# Supplementary material
Source: PubMed Central journal article supplement (PMC3886828)
Supplement: NIHMS511875-supplement-Sup_2.pdf [file NIHMS511875-supplement-Sup_2.pdf]

Supplementary Table 1A: Array CGH data on chromosome 9p using Agilent 244K chip

| Probe Name     | Chr Name | Start  | Stop   | Feature num | Name of Gene             | Colo824  | HCC70    | KYSE150   | HCC1954      |
|----------------|----------|--------|--------|-------------|--------------------------|----------|----------|-----------|--------------|
| A_16_P02044629 | 9        | 153131 | 153190 | 171546      | CBWD1                    | 0.433731 | 0.293122 | -0.809245 | -0.016788587 |
| A_16_P18525471 | 9        | 194193 | 194249 | 35918       | chr9:000194193-000194249 | 1.832383 | 1.29332  | -0.636128 | 0.68342555   |
| A_14_P110624   | 9        | 204367 | 204426 | 25082       | C9orf66                  | 1.912753 | 1.131713 | -0.096851 | 1.1985397    |
| A_16_P02044658 | 9        | 210253 | 210312 | 59264       | AB191037                 | 2.192887 | 1.468185 | -0.473934 | 1.2737765    |
| A_16_P02044673 | 9        | 219198 | 219257 | 138335      | AB191037                 | 2.270659 | 1.432514 | -0.586174 | 1.2138739    |
| A_16_P02044678 | 9        | 229426 | 229485 | 62872       | AB191037                 | 2.660892 | 1.757187 | -0.158736 | 1.3589735    |
| A_16_P18525568 | 9        | 235823 | 235882 | 41996       | AB191037                 | 2.405106 | 1.502859 | -0.288996 | 1.4074919    |
| A_16_P18525598 | 9        | 244654 | 244712 | 57857       | AB191037                 | 2.709812 | 1.819752 | 0.146253  | 1.9342985    |
| A_16_P18525624 | 9        | 256045 | 256104 | 225480      | AB191037                 | 2.038761 | 1.339149 | -0.681144 | 1.0595026    |
| A_16_P18525650 | 9        | 264517 | 264576 | 1341        | DOCK8                    | 2.460661 | 1.672433 | -0.328849 | 1.2034631    |
| A_16_P18525665 | 9        | 270255 | 270314 | 63067       | DOCK8                    | 2.33335  | 1.567588 | -0.382575 | 1.2408007    |
| A_16_P38622151 | 9        | 278161 | 278220 | 93205       | DOCK8                    | 1.991808 | 1.201274 | -1.001726 | 0.8813739    |
| A_16_P38622168 | 9        | 285346 | 285405 | 70710       | DOCK8                    | 2.483118 | 1.709968 | -0.194198 | 1.6406547    |
| A_16_P18525726 | 9        | 294586 | 294644 | 88811       | DOCK8                    | 2.443574 | 1.733573 | -0.427908 | 1.4522694    |
| A_16_P18525750 | 9        | 304969 | 305028 | 124529      | DOCK8                    | 2.407158 | 1.705373 | -0.279254 | 1.5096965    |
| A_16_P18525781 | 9        | 315713 | 315772 | 109125      | DOCK8                    | 2.357481 | 1.59609  | -0.255061 | 1.4646951    |
| A_14_P114068   | 9        | 322456 | 322515 | 16887       | DOCK8                    | 2.790039 | 1.974855 | 0.154581  | 1.9707965    |
| A_16_P18525828 | 9        | 330083 | 330142 | 42393       | DOCK8                    | 1.644288 | 0.773795 | -1.517733 | 0.3298949    |
| A_16_P02044875 | 9        | 346079 | 346138 | 210668      | DOCK8                    | 2.398873 | 1.54146  | -0.301818 | 1.3684162    |
| A_16_P18525899 | 9        | 351718 | 351777 | 23295       | DOCK8                    | 1.519393 | 0.731713 | -1.525558 | 0.43176782   |
| A_16_P02044904 | 9        | 360184 | 360243 | 59771       | DOCK8                    | 1.703955 | 0.854388 | -1.482733 | 0.38475618   |
| A_16_P38622437 | 9        | 371430 | 371489 | 94557       | DOCK8                    | 1.866426 | 1.093972 | -0.893938 | 0.7728381    |
| A_16_P02044941 | 9        | 380404 | 380463 | 72041       | DOCK8                    | 1.461016 | 0.515418 | -1.442722 | 0.052192777  |
| A_16_P02044954 | 9        | 386848 | 386907 | 129245      | DOCK8                    | 2.124766 | 1.194068 | -0.785654 | 1.054759     |
| A_16_P02044966 | 9        | 394997 | 395056 | 130789      | DOCK8                    | 1.648511 | 0.985246 | -1.234253 | 0.48362413   |
| A_16_P38622533 | 9        | 406292 | 406351 | 61791       | DOCK8                    | 2.193832 | 1.333472 | -0.547132 | 0.9532699    |
| A_16_P18526069 | 9        | 411985 | 412044 | 159810      | DOCK8                    | 2.217325 | 1.500577 | -0.456603 | 1.1872449    |
| A_16_P38622598 | 9        | 424742 | 424797 | 1109        | DOCK8                    | 2.247896 | 1.505688 | -0.45888  | 1.162071     |
| A_16_P02045040 | 9        | 433402 | 433461 | 7251        | DOCK8                    | 2.072725 | 1.109401 | -0.721235 | 1.0692648    |
| A_16_P02045053 | 9        | 442074 | 442133 | 1026        | DOCK8                    | 2.172603 | 1.452059 | -0.334503 | 1.0717281    |
| A_16_P02045064 | 9        | 449017 | 449076 | 135263      | DOCK8                    | 2.607589 | 1.784229 | -0.095227 | 1.5277491    |
| A_16_P18526190 | 9        | 454917 | 454976 | 111428      | DOCK8                    | 1.635123 | 0.213865 | -1.345501 | 0.4993542    |
| A_16_P02045085 | 9        | 462086 | 462145 | 135443      | BC037495                 | 1.82124  | 1.00871  | -1.074507 | 0.6771273    |
| A_16_P02045095 | 9        | 468814 | 468873 | 174720      | BC037495                 | 2.40297  | 1.567494 | -0.361242 | 1.2750993    |
| A_16_P18526249 | 9        | 476071 | 476130 | 33782       | BC037495                 | 2.226903 | 1.457103 | -0.674627 | 1.0121493    |
| A_16_P02045118 | 9        | 482289 | 482348 | 213135      | BC037495                 | 1.650553 | 0.894686 | -1.274017 | 0.48361218   |
| A_16_P18526283 | 9        | 490525 | 490584 | 107146      | BC037495                 | 2.119034 | 1.313674 | -0.620888 | 1.0635829    |
| A_16_P18526307 | 9        | 499521 | 499580 | 144276      | ANKRD15                  | 1.521577 | 1.012349 | -1.19126  | -0.13801548  |
| A_16_P18526327 | 9        | 507485 | 507544 | 28076       | ANKRD15                  | 1.662017 | 0.613804 | -1.386505 | 0.33514944   |
| A_16_P18526347 | 9        | 512936 | 512995 | 95843       | ANKRD15                  | 2.440338 | 1.486142 | -0.281113 | 1.2861575    |
| A_16_P02045178 | 9        | 522700 | 522759 | 157202      | ANKRD15                  | 2.315639 | 1.244091 | -0.299842 | 1.1012683    |
| A_16_P18526388 | 9        | 528529 | 528588 | 176999      | ANKRD15                  | 2.242752 | 1.425984 | -0.614255 | 1.2566147    |
| A_16_P02045193 | 9        | 534450 | 534509 | 163750      | ANKRD15                  | 1.988868 | 1.042021 | -1.073563 | 0.5588395    |
| A_16_P18526429 | 9        | 546625 | 546684 | 223368      | ANKRD15                  | 1.176054 | 0.533465 | -1.331749 | -0.20045584  |
| A_16_P38622949 | 9        | 553286 | 553345 | 97182       | ANKRD15                  | 1.307063 | 0.575556 | -1.711598 | 0.040945724  |
| A_16_P38622966 | 9        | 559898 | 559957 | 219197      | ANKRD15                  | 2.083398 | 1.268023 | -0.770343 | 1.0671463    |
| A_16_P02045246 | 9        | 569790 | 569849 | 200015      | ANKRD15                  | 2.20702  | 1.556628 | -0.763693 | 1.2207733    |
| A_16_P38623019 | 9        | 577359 | 577418 | 103320      | ANKRD15                  | 2.021944 | 1.178062 | -1.008437 | 0.7992527    |
| A_16_P18526525 | 9        | 584647 | 584706 | 149602      | ANKRD15                  | 1.86217  | 1.132067 | -1.121749 | 0.5520787    |
| A_16_P18526541 | 9        | 593494 | 593553 | 118743      | ANKRD15                  | 2.548894 | 1.682466 | -0.1711   | 1.632769     |
| A_14_P135177   | 9        | 601628 | 601687 | 219349      | ANKRD15                  | 2.162953 | 1.274526 | -0.774813 | 1.0868937    |
| A_16_P18526583 | 9        | 607082 | 607141 | 185808      | ANKRD15                  | 2.025039 | 1.202489 | -0.81926  | 1.0156455    |
| A_16_P02045332 | 9        | 623115 | 623174 | 30517       | ANKRD15                  | 2.177187 | 1.500272 | -0.494752 | 1.2480689    |
| A_16_P18526643 | 9        | 629010 | 629069 | 139832      | ANKRD15                  | 1.819657 | 0.956722 | -1.129403 | 0.51513577   |
| A_16_P02045366 | 9        | 640801 | 640860 | 50452       | ANKRD15                  | 2.398132 | 1.739595 | -0.309538 | 1.807214     |
| A_16_P18526698 | 9        | 649280 | 649339 | 140002      | ANKRD15                  | 2.405319 | 1.652434 | -0.42267  | 1.2548764    |
| A_16_P02045393 | 9        | 666870 | 666929 | 159944      | ANKRD15                  | 2.066442 | 1.204882 | -0.798076 | 0.9330224    |
| A_16_P38623264 | 9        | 675081 | 675140 | 240185      | ANKRD15                  | 1.652434 | 0.876826 | -1.387969 | 0.42112708   |
| A_16_P38623282 | 9        | 681104 | 681163 | 196657      | ANKRD15                  | 1.713884 | 0.914197 | -1.255359 | 0.5609784    |
| A_16_P02045450 | 9        | 693634 | 693693 | 15550       | ANKRD15                  | 2.793801 | 1.886581 | -0.113128 | 1.6964104    |
| A_16_P02045462 | 9        | 700775 | 700834 | 168835      | ANKRD15                  | 2.154394 | 1.416473 | -0.58922  | 1.1324744    |
| A_16_P38623377 | 9        | 710090 | 710149 | 25787       | ANKRD15                  | 2.332708 | 1.487741 | -0.621628 | 1.0311158    |
| A_14_P101255   | 9        | 720034 | 720088 | 189197      | ANKRD15                  | 0.861685 | 0.761138 | 0.033955  | 0.41256773   |
| A_16_P18526908 | 9        | 728215 | 728274 | 37748       | ANKRD15                  | 2.398445 | 1.605558 | -0.256225 | 1.1380923    |
| A_16_P18526935 | 9        | 735863 | 735922 | 129260      | ANKRD15                  | 1.691349 | 0.873647 | -1.37827  | 0.35581046   |
| A_16_P02045538 | 9        | 743255 | 743314 | 196474      | chr9:000743255-000743314 | 1.737379 | 0.938312 | -1.105422 | 0.57648563   |
| A_14_P134606   | 9        | 752947 | 753006 | 175187      | chr9:000752947-000753006 | 2.532961 | 1.304872 | -0.318968 | 1.4144937    |
| A_16_P02045564 | 9        | 763442 | 763494 | 171544      | chr9:000763442-000763494 | 2.625765 | 1.789259 | -0.015364 | 1.6555995    |
| A_16_P02045571 | 9        | 779786 | 779845 | 203887      | chr9:000779786-000779845 | 1.563857 | 0.706465 | -1.27102  | 0.6285428    |
| A_16_P18527055 | 9        | 795606 | 795665 | 124133      | AK126531                 | 2.512255 | 1.490889 | -0.404441 | 1.4254967    |
| A_16_P02045598 | 9        | 803540 | 803599 | 113823      | chr9:000803540-000803599 | 1.994369 | 1.152417 | -0.801061 | 0.85803103   |

|                |   |         |         |        |                          |          |          |           |            |
|----------------|---|---------|---------|--------|--------------------------|----------|----------|-----------|------------|
| A_16_P18527096 | 9 | 817900  | 817959  | 191613 | chr9:000817900-000817959 | 2.132748 | 1.295599 | -0.387918 | 0.8739963  |
| A_16_P02045620 | 9 | 829152  | 829211  | 178152 | chr9:000829152-000829211 | 2.210507 | 1.156824 | -0.69317  | 0.8675761  |
| A_16_P18527164 | 9 | 842989  | 843048  | 7063   | DMRT1                    | 2.021944 | 1.062067 | -0.972299 | 0.7010138  |
| A_16_P02045655 | 9 | 849182  | 849241  | 231740 | DMRT1                    | 2.30632  | 1.223418 | -0.608456 | 1.1592883  |
| A_14_P137073   | 9 | 855779  | 855838  | 82235  | DMRT1                    | 2.085394 | 1.164379 | -0.775958 | 0.88785374 |
| A_16_P18527221 | 9 | 867542  | 867601  | 122879 | DMRT1                    | 1.916979 | 0.944407 | -1.049725 | 0.670478   |
| A_16_P18527237 | 9 | 873877  | 873936  | 226680 | DMRT1                    | 2.051119 | 1.168186 | -0.756852 | 0.9383215  |
| A_14_P121763   | 9 | 883500  | 883559  | 14582  | DMRT1                    | 2.102156 | 1.33571  | -0.826687 | 0.9156258  |
| A_16_P18527290 | 9 | 892248  | 892307  | 106445 | DMRT1                    | 1.849847 | 1.319746 | -0.476672 | 1.3176574  |
| A_16_P18527317 | 9 | 900389  | 900448  | 30742  | DMRT1                    | 2.418669 | 1.524604 | -0.415301 | 1.3169545  |
| A_16_P18527347 | 9 | 909439  | 909498  | 133392 | DMRT1                    | 2.085385 | 1.356154 | -0.825259 | 0.803629   |
| A_16_P18527370 | 9 | 918142  | 918201  | 214563 | DMRT1                    | 1.489535 | 0.578528 | -1.578679 | 0.34375286 |
| A_16_P18527388 | 9 | 925735  | 925794  | 198806 | DMRT1                    | 2.490099 | 1.622328 | -0.160379 | 1.379211   |
| A_16_P18527402 | 9 | 934286  | 934345  | 138882 | DMRT1                    | 2.051794 | 1.246545 | -0.775278 | 0.8764462  |
| A_16_P02045805 | 9 | 942275  | 942334  | 84697  | DMRT1                    | 1.849642 | 0.82599  | -1.592994 | 0.504806   |
| A_16_P02045814 | 9 | 947632  | 947691  | 190324 | DMRT1                    | 1.855606 | 1.006356 | -1.183731 | 0.6817341  |
| A_16_P18527459 | 9 | 954094  | 954153  | 114009 | DMRT1                    | 1.838154 | 1.195    | -1.058167 | 0.95085096 |
| A_16_P02045843 | 9 | 958751  | 958810  | 196371 | DMRT1                    | 2.338996 | 1.448055 | -0.501778 | 1.2811073  |
| A_16_P02045853 | 9 | 963803  | 963862  | 126364 | chr9:000963803-000963862 | 2.379174 | 1.385809 | -0.561141 | 1.2627591  |
| A_14_P115828   | 9 | 973204  | 973263  | 113730 | DMRT3                    | 1.436612 | 0.575039 | -1.639406 | 0.33679742 |
| A_14_P132576   | 9 | 979894  | 979953  | 211796 | DMRT3                    | 2.056835 | 1.223925 | -0.835741 | 1.0115407  |
| A_14_P121618   | 9 | 980025  | 980073  | 176217 | DMRT3                    | 1.838859 | 0.894413 | -0.772637 | 0.6102022  |
| A_16_P18527572 | 9 | 986407  | 986466  | 110771 | chr9:000986407-000986466 | 2.321616 | 1.445309 | -0.601191 | 1.1790878  |
| A_16_P02045915 | 9 | 991974  | 992033  | 138692 | BC052949                 | 2.32244  | 1.414481 | -0.683585 | 1.2833339  |
| A_16_P18527610 | 9 | 1000349 | 1000408 | 97451  | chr9:001000349-001000408 | 1.998262 | 1.081183 | -1.003983 | 0.72984886 |
| A_16_P38624185 | 9 | 1019484 | 1019543 | 40919  | chr9:001019484-001019543 | 2.129571 | 1.223954 | -0.703583 | 1.0837687  |
| A_16_P18527693 | 9 | 1030254 | 1030313 | 217497 | chr9:001030254-001030313 | 2.003716 | 0.995291 | -1.107527 | 0.71636933 |
| A_16_P18527728 | 9 | 1039524 | 1039583 | 123694 | chr9:001039524-001039583 | 1.782715 | 0.968847 | -1.117027 | 0.574615   |
| A_14_P113138   | 9 | 1046309 | 1046368 | 34962  | DMRT2                    | 2.530826 | 1.542722 | -0.259376 | 1.6274761  |
| A_16_P18527775 | 9 | 1053728 | 1053787 | 83591  | chr9:001053728-001053787 | 2.032392 | 1.109372 | -0.854239 | 0.78979415 |
| A_16_P18527781 | 9 | 1060429 | 1060488 | 210479 | chr9:001060429-001060488 | 1.875285 | 0.827777 | -0.945063 | 0.63211703 |
| A_16_P02046045 | 9 | 1069463 | 1069522 | 70918  | chr9:001069463-001069522 | 2.73812  | 1.816851 | 0.067152  | 1.7871879  |
| A_16_P38624365 | 9 | 1081643 | 1081702 | 139991 | chr9:001081643-001081702 | 1.669262 | 0.996597 | -1.089868 | 0.3863521  |
| A_16_P02046077 | 9 | 1091407 | 1091466 | 97665  | chr9:001091407-001091466 | 2.207011 | 1.16654  | -0.786987 | 0.9313778  |
| A_16_P02046094 | 9 | 1110594 | 1110653 | 187568 | chr9:001110594-001110653 | 1.512863 | 0.555261 | -1.267062 | 0.2121107  |
| A_16_P18527921 | 9 | 1133457 | 1133516 | 65268  | chr9:001133457-001133516 | 1.914749 | 1.007554 | -1.024226 | 2.4454577  |
| A_14_P135575   | 9 | 1147109 | 1147168 | 55260  | chr9:001147109-001147168 | 2.044109 | 0.825269 | -0.762641 | 2.6538947  |
| A_16_P18528008 | 9 | 1167143 | 1167202 | 7404   | chr9:001167143-001167202 | 2.245842 | 1.388181 | -0.501265 | 2.779884   |
| A_16_P18528049 | 9 | 1189217 | 1189276 | 134597 | chr9:001189217-001189276 | 1.836056 | 0.471249 | -1.099446 | 2.1488671  |
| A_16_P18528110 | 9 | 1209198 | 1209257 | 30519  | chr9:001209198-001209257 | 2.12045  | 1.261354 | -0.585798 | 2.4239273  |
| A_16_P02046232 | 9 | 1222282 | 1222341 | 184117 | chr9:001222282-001222341 | 1.975809 | 1.156028 | -1.065209 | 2.2877371  |
| A_16_P18528149 | 9 | 1233178 | 1233237 | 82423  | chr9:001233178-001233237 | 1.721758 | 0.955184 | -1.108998 | 2.1268988  |
| A_16_P18528180 | 9 | 1242397 | 1242456 | 234077 | chr9:001242397-001242456 | 2.342173 | 1.571108 | -0.504547 | 2.9292889  |
| A_16_P18528218 | 9 | 1255595 | 1255654 | 106988 | chr9:001255595-001255654 | 1.994282 | 1.158121 | -0.795958 | 2.458285   |
| A_16_P18528250 | 9 | 1269051 | 1269110 | 221146 | chr9:001269051-001269110 | 1.685319 | 0.796265 | -1.376055 | 2.0969424  |
| A_16_P02046323 | 9 | 1278054 | 1278113 | 201518 | chr9:001278054-001278113 | 1.499428 | 0.906655 | -1.082895 | 2.2693822  |
| A_16_P02046336 | 9 | 1286477 | 1286536 | 173041 | chr9:001286477-001286536 | 2.274193 | 1.453784 | -0.500202 | 2.8120012  |
| A_16_P18528349 | 9 | 1299415 | 1299474 | 165944 | chr9:001299415-001299474 | 1.555374 | 0.802923 | -1.420302 | 2.009272   |
| A_16_P18528372 | 9 | 1310587 | 1310646 | 216    | chr9:001310587-001310646 | 1.827494 | 1.064844 | -0.66067  | 2.2989736  |
| A_16_P18528438 | 9 | 1330131 | 1330190 | 16450  | chr9:001330131-001330190 | 1.872966 | 1.031956 | -1.114191 | 2.1921983  |
| A_16_P18528467 | 9 | 1342782 | 1342841 | 162766 | chr9:001342782-001342841 | 1.538399 | 0.690886 | -1.301511 | 2.0892172  |
| A_14_P112976   | 9 | 1352641 | 1352700 | 47339  | chr9:001352641-001352700 | 1.876995 | 1.026224 | -0.436747 | 2.3053217  |
| A_16_P38625023 | 9 | 1362972 | 1363031 | 25023  | chr9:001362972-001363031 | 2.398131 | 1.584672 | -0.32748  | 2.9593425  |
| A_16_P38625050 | 9 | 1376143 | 1376202 | 100063 | chr9:001376143-001376202 | 1.801144 | 0.965603 | -1.067931 | 1.8284426  |
| A_16_P38625083 | 9 | 1395372 | 1395431 | 177143 | chr9:001395372-001395431 | 2.159787 | 1.15528  | -0.905797 | 1.9486495  |
| A_16_P18528607 | 9 | 1409154 | 1409213 | 121098 | chr9:001409154-001409213 | 2.424862 | 1.615538 | -0.139129 | 2.5084844  |
| A_16_P18528631 | 9 | 1418886 | 1418945 | 122039 | chr9:001418886-001418945 | 1.634949 | 0.843481 | -1.136721 | 1.5325172  |
| A_16_P18528677 | 9 | 1434560 | 1434619 | 821    | chr9:001434560-001434619 | 2.102349 | 1.304792 | -0.596956 | 2.1466477  |
| A_16_P18528705 | 9 | 1447606 | 1447665 | 103255 | chr9:001447606-001447665 | 1.881357 | 0.984973 | -0.925491 | 1.8789469  |
| A_16_P18528762 | 9 | 1467660 | 1467719 | 146888 | chr9:001467660-001467719 | 1.588876 | 0.583214 | -1.480844 | 1.3136395  |
| A_16_P38625294 | 9 | 1481277 | 1481336 | 143048 | chr9:001481277-001481336 | 2.080339 | 1.513951 | -0.86902  | 2.317987   |
| A_16_P38625308 | 9 | 1495137 | 1495196 | 136106 | chr9:001495137-001495196 | 1.953775 | 1.248245 | -0.798948 | 1.9651815  |
| A_16_P18528815 | 9 | 1506308 | 1506367 | 191692 | chr9:001506308-001506367 | 2.126666 | 1.376597 | -0.563159 | 2.185038   |
| A_16_P02046650 | 9 | 1517050 | 1517109 | 103518 | chr9:001517050-001517109 | 1.956745 | 1.123819 | -0.956871 | 1.9063109  |
| A_16_P18528878 | 9 | 1530440 | 1530499 | 62994  | chr9:001530440-001530499 | 2.27965  | 1.561833 | -0.316704 | 2.3210495  |
| A_16_P38625413 | 9 | 1538943 | 1539002 | 23251  | chr9:001538943-001539002 | 2.00695  | 1.251163 | -0.850961 | 1.9357972  |
| A_16_P38625438 | 9 | 1555527 | 1555586 | 24944  | chr9:001555527-001555586 | 1.635552 | 0.924129 | -1.210404 | 1.5670447  |
| A_14_P134334   | 9 | 1569408 | 1569467 | 28633  | chr9:001569408-001569467 | 1.915239 | 0.974897 | -0.662101 | 1.6026812  |
| A_16_P18528950 | 9 | 1582306 | 1582365 | 9734   | chr9:001582306-001582365 | 2.197682 | 1.370524 | -0.617245 | 2.129538   |
| A_16_P02046738 | 9 | 1601053 | 1601112 | 229719 | chr9:001601053-001601112 | 1.938992 | 1.105851 | -0.707746 | 1.8708588  |
| A_16_P02046758 | 9 | 1615654 | 1615713 | 164281 | chr9:001615654-001615713 | 2.404178 | 1.517476 | -0.269567 | 2.3320148  |
| A_16_P02046762 | 9 | 1624646 | 1624705 | 134415 | chr9:001624646-001624705 | 2.486704 | 1.546876 | -0.126653 | 2.7702925  |
| A_16_P18529080 | 9 | 1643251 | 1643310 | 15243  | chr9:001643251-001643310 | 2.056489 | 1.077651 | -0.811971 | 1.3313967  |

|                |   |         |         |        |                          |          |          |           |            |
|----------------|---|---------|---------|--------|--------------------------|----------|----------|-----------|------------|
| A_16_P18529111 | 9 | 1655235 | 1655294 | 82876  | chr9:001655235-001655294 | 1.467633 | 0.907725 | -1.560457 | 0.7138634  |
| A_16_P38625641 | 9 | 1664663 | 1664722 | 66619  | chr9:001664663-001664722 | 2.29969  | 1.615753 | -0.273167 | 1.8448783  |
| A_16_P18529150 | 9 | 1675740 | 1675799 | 214526 | chr9:001675740-001675799 | 2.223746 | 1.371649 | -0.571767 | 1.6154962  |
| A_16_P38625675 | 9 | 1690815 | 1690874 | 179008 | chr9:001690815-001690874 | 2.259846 | 1.292361 | -0.533497 | 1.4156133  |
| A_16_P02046850 | 9 | 1699690 | 1699749 | 1316   | chr9:001699690-001699749 | 2.322915 | 1.321505 | -0.366555 | 1.494046   |
| A_16_P18529234 | 9 | 1714047 | 1714106 | 203745 | chr9:001714047-001714106 | 2.071603 | 1.187009 | -0.941398 | 1.1891078  |
| A_14_P123587   | 9 | 1728515 | 1728574 | 139996 | chr9:001728515-001728574 | 1.427392 | 0.877552 | -0.622166 | 0.7938428  |
| A_16_P02046927 | 9 | 1748228 | 1748287 | 63694  | chr9:001748228-001748287 | 1.911027 | 1.002535 | -0.997423 | 1.0749614  |
| A_16_P18529344 | 9 | 1757584 | 1757643 | 49053  | chr9:001757584-001757643 | 2.078853 | 1.368339 | -0.631697 | 1.3663363  |
| A_16_P18529354 | 9 | 1767483 | 1767542 | 140634 | chr9:001767483-001767542 | 1.894191 | 1.071833 | -1.180256 | 0.96404153 |
| A_16_P02046967 | 9 | 1783496 | 1783555 | 63844  | chr9:001783496-001783555 | 2.509826 | 1.04657  | -0.89461  | 1.1880811  |
| A_16_P18529409 | 9 | 1793603 | 1793662 | 52852  | chr9:001793603-001793662 | 2.013605 | 1.160909 | -0.902137 | 1.3867548  |
| A_16_P02047001 | 9 | 1808052 | 1808111 | 136519 | chr9:001808052-001808111 | 1.567503 | 0.531481 | -1.368714 | 0.78320396 |
| A_16_P38625979 | 9 | 1817515 | 1817574 | 72655  | chr9:001817515-001817574 | 1.803227 | 1.035674 | -0.97408  | 1.115284   |
| A_16_P18529494 | 9 | 1827447 | 1827506 | 15077  | chr9:001827447-001827506 | 1.268985 | 0.42235  | -1.464811 | 0.3216792  |
| A_16_P18529540 | 9 | 1846461 | 1846520 | 37653  | chr9:001846461-001846520 | 2.394616 | 1.552309 | -0.247315 | 1.7571144  |
| A_16_P02047067 | 9 | 1864080 | 1864139 | 92596  | chr9:001864080-001864139 | 2.558792 | 1.472724 | -0.021236 | 1.8429558  |
| A_16_P38626132 | 9 | 1882616 | 1882675 | 151858 | chr9:001882616-001882675 | 1.930714 | 1.104874 | -1.236659 | 1.1834705  |
| A_16_P38626164 | 9 | 1897935 | 1897994 | 63123  | chr9:001897935-001897994 | 2.053275 | 1.107867 | -0.619674 | 1.3341873  |
| A_16_P02047150 | 9 | 1916175 | 1916234 | 119502 | chr9:001916175-001916234 | 1.521327 | 0.715207 | -1.391808 | 0.8698927  |
| A_16_P38626230 | 9 | 1928740 | 1928799 | 6951   | chr9:001928740-001928799 | 2.64815  | 1.840528 | -0.039629 | 2.169964   |
| A_16_P02047186 | 9 | 1939505 | 1939564 | 227314 | chr9:001939505-001939564 | 1.962838 | 1.1089   | -0.905361 | 1.4140966  |
| A_16_P18529784 | 9 | 1951740 | 1951799 | 1612   | chr9:001951740-001951799 | 2.027416 | 1.23649  | -0.764211 | 1.5724784  |
| A_14_P110528   | 9 | 1972355 | 1972414 | 179399 | chr9:001972355-001972414 | 1.893947 | 1.054565 | -1.039889 | 1.3757206  |
| A_16_P18529868 | 9 | 1981903 | 1981962 | 170222 | chr9:001981903-001981962 | 2.017611 | 1.136608 | -0.643599 | 1.546504   |
| A_16_P18529893 | 9 | 1989111 | 1989170 | 194343 | chr9:001989111-001989170 | 1.922704 | 1.017104 | -0.945949 | 1.4668715  |
| A_16_P18529919 | 9 | 1997646 | 1997705 | 95088  | chr9:001997646-001997705 | 2.233243 | 1.2394   | -0.294805 | 1.8596976  |
| A_16_P02047296 | 9 | 2003757 | 2003816 | 23455  | chr9:002003757-002003816 | 2.437369 | 1.395147 | -0.347134 | 1.8351197  |
| A_16_P18529970 | 9 | 2013418 | 2013477 | 136476 | SMARCA2                  | 2.371671 | 1.438118 | -0.25581  | 1.9309131  |
| A_16_P18529991 | 9 | 2019231 | 2019290 | 221087 | SMARCA2                  | 2.16435  | 1.17565  | -0.65829  | 1.5225781  |
| A_14_P112263   | 9 | 2029442 | 2029500 | 53132  | SMARCA2                  | 2.404835 | 1.595308 | 0.162227  | 2.2416894  |
| A_16_P18530059 | 9 | 2039845 | 2039904 | 24725  | SMARCA2                  | 1.950269 | 1.18022  | -0.829688 | 1.7297693  |
| A_16_P02047390 | 9 | 2048268 | 2048327 | 103367 | SMARCA2                  | 1.753004 | 1.057377 | -0.937871 | 1.4836813  |
| A_16_P18530113 | 9 | 2055784 | 2055843 | 77575  | SMARCA2                  | 1.88454  | 0.895762 | -1.078864 | 1.2589371  |
| A_16_P02047433 | 9 | 2066268 | 2066327 | 36330  | SMARCA2                  | 2.231864 | 1.349774 | -0.353793 | 1.8965808  |
| A_16_P38626690 | 9 | 2071979 | 2072038 | 97124  | SMARCA2                  | 2.176622 | 1.334773 | -0.491027 | 1.6264387  |
| A_14_P112573   | 9 | 2078528 | 2078587 | 129852 | SMARCA2                  | 1.686745 | 0.966755 | -1.021524 | 1.2848796  |
| A_16_P18530210 | 9 | 2084861 | 2084920 | 235726 | SMARCA2                  | 1.60636  | 0.81951  | -1.309109 | 0.9936948  |
| A_16_P02047485 | 9 | 2091580 | 2091639 | 183791 | SMARCA2                  | 1.952271 | 1.061319 | -0.909839 | 1.461432   |
| A_16_P38626788 | 9 | 2100192 | 2100251 | 47836  | SMARCA2                  | 2.270988 | 1.206426 | -0.604226 | 1.419334   |
| A_14_P132731   | 9 | 2109502 | 2109561 | 127219 | SMARCA2                  | 2.198965 | 1.324771 | -0.588634 | 1.7332675  |
| A_16_P18530315 | 9 | 2115256 | 2115315 | 80502  | SMARCA2                  | 2.271162 | 1.527762 | -0.482052 | 1.8965919  |
| A_16_P18530333 | 9 | 2122147 | 2122206 | 193468 | SMARCA2                  | 1.924781 | 1.425331 | -0.867588 | 1.6637868  |
| A_16_P02047568 | 9 | 2131771 | 2131830 | 64153  | SMARCA2                  | 2.205556 | 1.357004 | -0.561793 | 1.6207335  |
| A_16_P18530379 | 9 | 2138129 | 2138188 | 4183   | SMARCA2                  | 1.935648 | 0.959818 | -0.91557  | 1.3856262  |
| A_16_P02047602 | 9 | 2151856 | 2151915 | 81340  | SMARCA2                  | 2.804826 | 1.808758 | -0.009427 | 2.1729298  |
| A_16_P18530437 | 9 | 2160457 | 2160516 | 194033 | SMARCA2                  | 1.506646 | 1.444097 | -0.783141 | 1.514815   |
| A_16_P38626995 | 9 | 2166245 | 2166304 | 215624 | SMARCA2                  | 1.992485 | 1.157493 | -0.733447 | 1.3889389  |
| A_16_P18530476 | 9 | 2171506 | 2171565 | 219285 | SMARCA2                  | 1.630054 | 0.825505 | -1.197961 | 1.0833734  |
| A_14_P123409   | 9 | 2182590 | 2182649 | 15621  | SMARCA2                  | 2.271466 | 1.41295  | -0.52911  | 1.8422154  |
| A_14_P201162   | 9 | 2187800 | 2187859 | 91704  | chr9:002187800-002187859 | 2.802156 | 1.749283 | 0.151859  | 2.1490352  |
| A_16_P02047680 | 9 | 2198793 | 2198852 | 105302 | chr9:002198793-002198852 | 1.974752 | 0.975886 | -0.914981 | 1.3575635  |
| A_16_P18530552 | 9 | 2205180 | 2205239 | 139734 | chr9:002205180-002205239 | 1.68155  | 0.802414 | -1.33405  | 1.0133286  |
| A_16_P38627129 | 9 | 2220300 | 2220359 | 165175 | chr9:002220300-002220359 | 2.657778 | 1.685127 | 0.034608  | 2.3641815  |
| A_16_P02047729 | 9 | 2239164 | 2239223 | 227472 | chr9:002239164-002239223 | 2.527241 | 1.549444 | -0.115129 | 2.1455855  |
| A_16_P02047762 | 9 | 2257812 | 2257871 | 65963  | chr9:002257812-002257871 | 1.953701 | 1.174141 | -0.752308 | 1.6103258  |
| A_16_P18530744 | 9 | 2284322 | 2284381 | 49907  | chr9:002284322-002284381 | 2.605912 | 1.551629 | -0.212223 | 2.0391936  |
| A_16_P38627319 | 9 | 2293563 | 2293622 | 50993  | chr9:002293563-002293622 | 2.468941 | 1.530552 | -0.217294 | 2.1202621  |
| A_16_P18530806 | 9 | 2314333 | 2314392 | 101538 | chr9:002314333-002314392 | 2.182014 | 1.320642 | -0.631725 | 1.6464291  |
| A_16_P18530834 | 9 | 2325671 | 2325730 | 77005  | chr9:002325671-002325730 | 2.458131 | 1.518961 | -0.341986 | 1.8762234  |
| A_16_P38627404 | 9 | 2335993 | 2336052 | 345    | chr9:002335993-002336052 | 2.308055 | 1.481059 | -0.373027 | 1.8837895  |
| A_16_P18530869 | 9 | 2344226 | 2344285 | 160817 | chr9:002344226-002344285 | 2.0062   | 1.000146 | -0.796968 | 1.3914906  |
| A_16_P18530917 | 9 | 2370959 | 2371018 | 25348  | chr9:002370959-002371018 | 2.32885  | 1.424655 | -0.466411 | 1.9162544  |
| A_16_P38627498 | 9 | 2380613 | 2380672 | 47407  | chr9:002380613-002380672 | 2.209643 | 1.252301 | -0.533842 | 1.5303725  |
| A_16_P18530967 | 9 | 2397981 | 2398040 | 153692 | chr9:002397981-002398040 | 1.485159 | 0.331586 | -1.323947 | 0.8513699  |
| A_14_P105740   | 9 | 2408075 | 2408134 | 175922 | chr9:002408075-002408134 | 1.321697 | 0.569334 | -1.314567 | 0.76783293 |
| A_16_P18531028 | 9 | 2420897 | 2420956 | 7090   | AK092343                 | 2.309049 | 1.440305 | -0.293633 | 2.019041   |
| A_16_P18531042 | 9 | 2443370 | 2443429 | 126060 | AK092343                 | 2.572853 | 1.571479 | -0.170287 | 2.0619197  |
| A_16_P18531071 | 9 | 2454034 | 2454093 | 46048  | AK092343                 | 2.176313 | 1.21793  | -0.420364 | 1.784546   |
| A_16_P38627653 | 9 | 2467624 | 2467683 | 7079   | AK092343                 | 2.678718 | 1.50645  | -0.070524 | 2.0299265  |
| A_16_P18531123 | 9 | 2476482 | 2476541 | 162739 | AK092343                 | 2.166867 | 1.142078 | -0.402377 | 1.9905888  |
| A_16_P18531160 | 9 | 2490971 | 2491030 | 16793  | AK092343                 | 2.147202 | 1.201853 | -0.537941 | 1.749882   |
| A_16_P18531193 | 9 | 2518286 | 2518345 | 122070 | AK092343                 | 2.530917 | 1.685779 | -0.114189 | 2.1914434  |

|                |   |         |         |        |                          |          |           |           |            |
|----------------|---|---------|---------|--------|--------------------------|----------|-----------|-----------|------------|
| A_14_P109730   | 9 | 2525632 | 2525691 | 68049  | AK092343                 | 2.525021 | 1.65656   | -0.026779 | 2.1521254  |
| A_16_P18531250 | 9 | 2537615 | 2537674 | 19437  | AK092343                 | 2.20028  | 1.251114  | -1.03272  | 1.3430389  |
| A_16_P18531273 | 9 | 2555507 | 2555566 | 151572 | AK092343                 | 2.225069 | 1.316639  | -0.543207 | 1.7471741  |
| A_16_P18531321 | 9 | 2572022 | 2572081 | 207765 | AK092343                 | 2.036275 | 1.105849  | -0.824532 | 1.6567154  |
| A_16_P18531328 | 9 | 2580562 | 2580621 | 231373 | AK092343                 | 1.9184   | 1.108403  | -0.942788 | 1.6495545  |
| A_16_P18531358 | 9 | 2592123 | 2592182 | 161744 | AK092343                 | 2.233099 | 1.35734   | -0.445549 | 1.9235747  |
| A_16_P02048181 | 9 | 2603443 | 2603502 | 69975  | AK092343                 | 2.495911 | 1.585351  | -0.105637 | 2.0653174  |
| A_16_P02048192 | 9 | 2610066 | 2610125 | 143514 | AK092343                 | 2.537001 | 1.556619  | 0.00108   | 2.1861286  |
| A_14_P130747   | 9 | 2615492 | 2615551 | 85787  | VLDLR                    | 1.980221 | 1.214282  | -0.664993 | 1.523045   |
| A_14_P109602   | 9 | 2619346 | 2619405 | 201430 | VLDLR                    | 1.888828 | 0.988221  | -0.538013 | 1.372693   |
| A_16_P02048228 | 9 | 2629829 | 2629888 | 37721  | VLDLR                    | 2.452188 | 1.66622   | -0.349028 | 2.1180434  |
| A_16_P18531488 | 9 | 2634972 | 2635031 | 202773 | VLDLR                    | 2.477701 | 1.371789  | -0.211773 | 1.8202176  |
| A_16_P18531505 | 9 | 2640507 | 2640566 | 117606 | VLDLR                    | 1.891369 | 0.938317  | -0.988983 | 1.5930656  |
| A_16_P18531547 | 9 | 2651697 | 2651756 | 163628 | chr9:002651697-002651756 | 2.66102  | 1.776247  | 0.10603   | 2.4657269  |
| A_16_P02048294 | 9 | 2660643 | 2660702 | 187584 | chr9:002660643-002660702 | 2.141571 | 1.341482  | -0.323291 | 1.9415891  |
| A_16_P18531598 | 9 | 2674213 | 2674272 | 22608  | chr9:002674213-002674272 | 1.960506 | 1.066141  | -0.912157 | 1.6602507  |
| A_16_P38628192 | 9 | 2681813 | 2681872 | 205889 | chr9:002681813-002681872 | 1.741526 | 0.791998  | -1.144373 | 1.3623127  |
| A_16_P38628336 | 9 | 2689712 | 2689771 | 145957 | chr9:002689712-002689771 | 0.724045 | -0.106488 | -2.274206 | 0.44582474 |
| A_16_P38628230 | 9 | 2697050 | 2697109 | 109304 | chr9:002697050-002697109 | 1.364941 | 0.597924  | -1.411865 | 1.0535381  |
| A_16_P02048352 | 9 | 2701186 | 2701245 | 118637 | chr9:002701186-002701245 | 1.983061 | 1.03213   | -0.741769 | 1.608796   |
| A_14_P108753   | 9 | 2709261 | 2709320 | 191051 | KCNV2                    | 1.991214 | 1.187855  | -0.695099 | 1.7031058  |
| A_16_P02048375 | 9 | 2714158 | 2714217 | 237572 | KCNV2                    | 2.051795 | 1.018468  | -0.929538 | 1.8018204  |
| A_16_P02048387 | 9 | 2719722 | 2719781 | 211273 | KCNV2                    | 1.87597  | 1.16851   | -0.708146 | 1.5871813  |
| A_16_P02048387 | 9 | 2719722 | 2719781 | 199529 | KCNV2                    | 1.880849 | 0.959155  | -0.707143 | 1.6436708  |
| A_16_P02048387 | 9 | 2719722 | 2719781 | 184613 | KCNV2                    | 1.793347 | 1.112822  | -0.608195 | 1.6224289  |
| A_16_P02048402 | 9 | 2727466 | 2727525 | 191246 | chr9:002727466-002727525 | 2.617413 | 1.488966  | -0.409316 | 2.0699918  |
| A_16_P38628336 | 9 | 2733114 | 2733173 | 18334  | chr9:002733114-002733173 | 1.777413 | 0.947225  | -0.952053 | 1.4429587  |
| A_16_P02048413 | 9 | 2739420 | 2739479 | 23605  | chr9:002739420-002739479 | 2.721409 | 1.839978  | 0.064412  | 2.6563158  |
| A_16_P38628357 | 9 | 2749076 | 2749135 | 163072 | chr9:002749076-002749135 | 2.349838 | 1.391109  | -0.380882 | 2.0930786  |
| A_16_P18531796 | 9 | 2756723 | 2756782 | 133200 | chr9:002756723-002756782 | 1.893457 | 1.04862   | -0.766561 | 1.5038518  |
| A_16_P18531838 | 9 | 2780359 | 2780418 | 240594 | chr9:002780359-002780418 | 1.769758 | 0.935414  | -0.957833 | 1.4745276  |
| A_16_P18531874 | 9 | 2794077 | 2794136 | 203734 | chr9:002794077-002794136 | 1.862058 | 0.828937  | -1.138022 | 1.4028349  |
| A_16_P18531900 | 9 | 2802153 | 2802212 | 75511  | KIAA0020                 | 2.595655 | 1.555435  | -0.250828 | 2.3361435  |
| A_16_P18531917 | 9 | 2807915 | 2807974 | 10121  | KIAA0020                 | 1.454977 | 0.566189  | -0.026323 | 2.4062037  |
| A_16_P38628523 | 9 | 2816755 | 2816814 | 56672  | KIAA0020                 | 1.875846 | 0.976866  | -0.960462 | 1.5353364  |
| A_14_P121559   | 9 | 2822701 | 2822760 | 77714  | KIAA0020                 | 2.228129 | 1.249023  | -0.582013 | 2.1549532  |
| A_16_P02048546 | 9 | 2833078 | 2833137 | 194245 | KIAA0020                 | 1.536613 | 0.734911  | -1.487758 | 1.1884272  |
| A_16_P18532005 | 9 | 2838513 | 2838572 | 150975 | chr9:002838513-002838572 | 1.507116 | 0.581513  | -1.562733 | 1.0263478  |
| A_16_P02048558 | 9 | 2844940 | 2844999 | 10995  | chr9:002844940-002844999 | 2.244432 | 1.427144  | -0.460432 | 1.7388793  |
| A_16_P18532031 | 9 | 2854423 | 2854482 | 120475 | chr9:002854423-002854482 | 2.498455 | 1.413657  | -0.25032  | 2.2132475  |
| A_16_P02048600 | 9 | 2870481 | 2870540 | 16795  | chr9:002870481-002870540 | 2.236924 | 1.626637  | -0.306841 | 1.8929033  |
| A_16_P18532103 | 9 | 2891047 | 2891106 | 81594  | chr9:002891047-002891106 | 2.141421 | 1.105682  | -1.028389 | 1.6726482  |
| A_14_P121347   | 9 | 2906200 | 2906259 | 219469 | chr9:002906200-002906259 | 2.109195 | 1.421415  | -0.722055 | 2.0179214  |
| A_16_P02048657 | 9 | 2914912 | 2914971 | 152271 | chr9:002914912-002914971 | 2.5333   | 1.666248  | -0.181835 | 2.3859832  |
| A_16_P18532226 | 9 | 2938656 | 2938715 | 10394  | chr9:002938656-002938715 | 1.521035 | 0.754366  | -1.277033 | 1.1344209  |
| A_16_P18532268 | 9 | 2952674 | 2952733 | 171139 | chr9:002952674-002952733 | 1.985729 | 1.075916  | -0.840688 | 1.6440803  |
| A_16_P02048739 | 9 | 2974222 | 2974281 | 87107  | chr9:002974222-002974281 | 2.641569 | 1.681295  | -0.216517 | 2.3327563  |
| A_16_P18532331 | 9 | 2982927 | 2982986 | 205145 | chr9:002982927-002982986 | 2.624183 | 1.705344  | -0.06441  | 2.394533   |
| A_16_P02048773 | 9 | 2993931 | 2993990 | 77680  | chr9:002993931-002993990 | 2.292097 | 1.327228  | -0.442523 | 2.0442266  |
| A_16_P38629002 | 9 | 3012488 | 3012547 | 130886 | chr9:003012488-003012547 | 2.137139 | 1.32447   | -0.72321  | 2.029736   |
| A_16_P18532449 | 9 | 3026276 | 3026335 | 131434 | chr9:003026276-003026335 | 2.222791 | 1.465832  | -0.31582  | 2.112019   |
| A_16_P38629062 | 9 | 3037754 | 3037813 | 215863 | chr9:003037754-003037813 | 1.954382 | 1.085706  | -0.806528 | 1.779827   |
| A_16_P02048856 | 9 | 3053146 | 3053205 | 202230 | chr9:003053146-003053205 | 2.175709 | 1.508538  | -0.468804 | 2.003055   |
| A_16_P02048882 | 9 | 3070493 | 3070552 | 152826 | chr9:003070493-003070552 | 2.061907 | 1.142092  | -0.599727 | 1.8806238  |
| A_16_P18532584 | 9 | 3088538 | 3088597 | 123561 | chr9:003088538-003088597 | 1.510292 | 0.719041  | -1.576286 | 1.0694754  |
| A_16_P18532599 | 9 | 3104401 | 3104460 | 89228  | chr9:003104401-003104460 | 1.791763 | 1.024476  | -0.957283 | 1.6760747  |
| A_16_P18532627 | 9 | 3116706 | 3116765 | 190421 | chr9:003116706-003116765 | 2.075895 | 1.192651  | -0.721415 | 1.7206037  |
| A_16_P38629259 | 9 | 3130251 | 3130310 | 150552 | chr9:003130251-003130310 | 2.07457  | 1.337231  | -0.396489 | 1.9614896  |
| A_16_P18532679 | 9 | 3143359 | 3143418 | 134651 | chr9:003143359-003143418 | 1.907224 | 0.873991  | -0.866165 | 1.6261553  |
| A_16_P38629283 | 9 | 3152579 | 3152638 | 78753  | chr9:003152579-003152638 | 1.744328 | 0.876721  | -1.071203 | 1.5364742  |
| A_16_P18532711 | 9 | 3161960 | 3162019 | 205875 | chr9:003161960-003162019 | 1.935198 | 1.025234  | -0.810138 | 1.7253355  |
| A_16_P02049001 | 9 | 3170451 | 3170510 | 197278 | chr9:003170451-003170510 | 2.888605 | 1.97286   | 0.212895  | 2.8592203  |
| A_14_P138223   | 9 | 3187162 | 3187221 | 146787 | BC041456                 | 1.907901 | 0.951953  | -0.81834  | 1.9113245  |
| A_16_P38629404 | 9 | 3196884 | 3196943 | 32786  | chr9:003196884-003196943 | 1.89161  | 1.048012  | -0.869238 | 2.1053724  |
| A_16_P18532850 | 9 | 3211616 | 3211675 | 176060 | AK127804                 | 2.359471 | 1.526177  | -0.120563 | 2.261608   |
| A_16_P18532876 | 9 | 3218384 | 3218443 | 213127 | RFX3                     | 1.774342 | 1.116971  | -0.687587 | 1.8242134  |
| A_16_P02049107 | 9 | 3231237 | 3231296 | 60801  | RFX3                     | 2.11456  | 1.334153  | -0.645327 | 2.24881    |
| A_14_P129070   | 9 | 3237110 | 3237169 | 65920  | RFX3                     | 2.185149 | 1.24252   | -0.45713  | 2.4094765  |
| A_16_P18532961 | 9 | 3245215 | 3245274 | 94392  | RFX3                     | 1.9626   | 1.206722  | -0.641707 | 2.1092296  |
| A_16_P38629574 | 9 | 3252862 | 3252921 | 1811   | RFX3                     | 2.296347 | 1.16583   | -0.501374 | 2.6160078  |
| A_16_P18533008 | 9 | 3260737 | 3260796 | 172071 | RFX3                     | 1.676585 | 0.718384  | -1.083253 | 1.8246946  |
| A_16_P38629630 | 9 | 3267306 | 3267365 | 229857 | RFX3                     | 2.297083 | 1.531099  | -0.094397 | 2.5291762  |
| A_16_P02049209 | 9 | 3278211 | 3278270 | 137361 | RFX3                     | 2.264107 | 1.237782  | -0.451153 | 2.3418674  |

|                |   |         |         |        |                          |          |          |           |           |
|----------------|---|---------|---------|--------|--------------------------|----------|----------|-----------|-----------|
| A_16_P38629691 | 9 | 3283494 | 3283553 | 224686 | RFX3                     | 1.836432 | 1.0936   | -0.970033 | 1.883496  |
| A_16_P18533110 | 9 | 3289339 | 3289398 | 106809 | RFX3                     | 1.960838 | 1.036137 | -0.89055  | 2.024413  |
| A_16_P18533141 | 9 | 3298176 | 3298235 | 100466 | RFX3                     | 2.198861 | 1.281353 | -0.659118 | 2.4690683 |
| A_16_P38629769 | 9 | 3313022 | 3313081 | 212096 | RFX3                     | 1.815349 | 1.053166 | -1.02624  | 2.0299397 |
| A_16_P38629795 | 9 | 3320071 | 3320130 | 60509  | RFX3                     | 1.745224 | 0.975411 | -1.066108 | 1.8302101 |
| A_16_P02049296 | 9 | 3327199 | 3327258 | 154664 | RFX3                     | 2.248941 | 1.397386 | -0.443111 | 2.459954  |
| A_14_P112297   | 9 | 3336643 | 3336702 | 59641  | RFX3                     | 1.460336 | 0.66649  | -1.46433  | 1.4489307 |
| A_16_P18533255 | 9 | 3348548 | 3348607 | 11113  | RFX3                     | 1.764129 | 0.873958 | -0.960632 | 1.7085679 |
| A_16_P38629893 | 9 | 3357701 | 3357760 | 36424  | RFX3                     | 2.037342 | 1.172996 | -0.522692 | 2.184064  |
| A_16_P18533303 | 9 | 3363304 | 3363363 | 184427 | RFX3                     | 1.403572 | 0.630128 | -0.684456 | 1.4665352 |
| A_16_P18533315 | 9 | 3370357 | 3370416 | 187103 | RFX3                     | 2.1231   | 1.321527 | -1.339496 | 2.4247663 |
| A_14_P101607   | 9 | 3385562 | 3385616 | 122327 | RFX3                     | 1.807177 | 1.121985 | -0.750094 | 1.9195685 |
| A_16_P18533399 | 9 | 3397881 | 3397940 | 98852  | RFX3                     | 1.735251 | 0.921399 | -1.231678 | 1.8849747 |
| A_16_P18533427 | 9 | 3405897 | 3405956 | 104802 | RFX3                     | 2.328234 | 1.513172 | -0.112889 | 2.6528785 |
| A_16_P18533447 | 9 | 3413022 | 3413081 | 86061  | RFX3                     | 1.878522 | 1.057144 | -0.912345 | 2.0922558 |
| A_16_P02049444 | 9 | 3419941 | 3420000 | 146482 | RFX3                     | 1.85168  | 0.980774 | -0.888795 | 2.0476213 |
| A_16_P18533476 | 9 | 3427016 | 3427075 | 194372 | RFX3                     | 1.881985 | 1.184051 | -1.064191 | 1.9400355 |
| A_16_P18533481 | 9 | 3435106 | 3435165 | 190364 | RFX3                     | 1.869592 | 1.149941 | -0.796596 | 1.9846541 |
| A_16_P18533510 | 9 | 3444648 | 3444707 | 72838  | RFX3                     | 2.057857 | 1.242153 | -0.585778 | 2.3442373 |
| A_16_P38630134 | 9 | 3450329 | 3450388 | 194389 | RFX3                     | 1.822963 | 1.142614 | -0.666205 | 2.1411748 |
| A_16_P18533556 | 9 | 3462726 | 3462785 | 28643  | RFX3                     | 2.119773 | 1.321266 | -0.537636 | 2.16436   |
| A_14_P122241   | 9 | 3470606 | 3470665 | 140522 | RFX3                     | 1.352827 | 0.417085 | -1.339496 | 1.4863414 |
| A_16_P38630205 | 9 | 3477532 | 3477591 | 126899 | RFX3                     | 2.092516 | 1.232875 | -0.473862 | 2.2543855 |
| A_16_P18533630 | 9 | 3487920 | 3487979 | 164164 | RFX3                     | 2.155813 | 1.332301 | -0.596125 | 2.3371341 |
| A_16_P38630286 | 9 | 3502870 | 3502929 | 13809  | RFX3                     | 1.902423 | 1.101293 | -0.909965 | 2.059187  |
| A_14_P128525   | 9 | 3509377 | 3509436 | 96631  | RFX3                     | 1.99855  | 1.135446 | -1.072053 | 1.903863  |
| A_16_P18533736 | 9 | 3519295 | 3519354 | 139783 | chr9:003519295-003519354 | 1.922523 | 0.961204 | -1.231041 | 1.7679619 |
| A_16_P18533765 | 9 | 3535395 | 3535454 | 13089  | chr9:003535395-003535454 | 1.85338  | 1.11262  | -0.917884 | 1.7996812 |
| A_16_P18533794 | 9 | 3546485 | 3546541 | 29338  | chr9:003546485-003546541 | 2.382772 | 1.490099 | -0.448267 | 2.1828756 |
| A_16_P02049664 | 9 | 3559883 | 3559942 | 150784 | chr9:003559883-003559942 | 2.313798 | 1.583746 | -0.237943 | 2.3501074 |
| A_16_P38630443 | 9 | 3579641 | 3579700 | 220660 | chr9:003579641-003579700 | 1.772088 | 1.053018 | -0.76061  | 1.7648302 |
| A_16_P18533872 | 9 | 3592155 | 3592214 | 154418 | chr9:003592155-003592214 | 2.02628  | 1.201664 | -0.814599 | 2.0455256 |
| A_16_P38630485 | 9 | 3603973 | 3604032 | 103989 | chr9:003603973-003604032 | 2.026658 | 1.440968 | -0.478563 | 2.2135212 |
| A_16_P18533906 | 9 | 3626356 | 3626415 | 197147 | chr9:003626356-003626415 | 2.003151 | 1.266976 | -0.480196 | 2.11266   |
| A_16_P18533922 | 9 | 3635877 | 3635936 | 232944 | chr9:003635877-003635936 | 1.881984 | 1.138892 | -0.786323 | 1.9323949 |
| A_16_P18533955 | 9 | 3652377 | 3652436 | 114381 | chr9:003652377-003652436 | 2.63956  | 1.879272 | 0.036254  | 2.8743396 |
| A_16_P02049760 | 9 | 3660989 | 3661048 | 131098 | chr9:003660989-003661048 | 1.923597 | 1.126461 | -0.87195  | 1.9088199 |
| A_16_P18534001 | 9 | 3670060 | 3670119 | 23755  | AK126819                 | 2.515557 | 1.607959 | 0.068242  | 2.7444453 |
| A_16_P38630643 | 9 | 3686696 | 3686755 | 73100  | chr9:003686696-003686755 | 2.115644 | 1.447412 | -0.455512 | 2.4426894 |
| A_16_P02049821 | 9 | 3696059 | 3696115 | 11164  | chr9:003696059-003696115 | 2.110623 | 1.459964 | -0.461868 | 2.3748808 |
| A_16_P18534075 | 9 | 3709596 | 3709655 | 54939  | AK128171                 | 2.117281 | 1.542159 | -0.276378 | 2.4419692 |
| A_14_P110000   | 9 | 3718444 | 3718503 | 12465  | chr9:003718444-003718503 | 1.960208 | 1.129033 | -0.798615 | 2.0122538 |
| A_16_P38630724 | 9 | 3728438 | 3728497 | 9207   | BC047388                 | 1.92638  | 1.245125 | -0.773894 | 2.192865  |
| A_16_P02049868 | 9 | 3736640 | 3736699 | 160074 | BC047388                 | 2.393596 | 1.709624 | -0.235876 | 2.5523915 |
| A_16_P18534179 | 9 | 3744972 | 3745031 | 95761  | BC047388                 | 2.122929 | 1.453986 | -0.375807 | 2.4485996 |
| A_16_P02049906 | 9 | 3761025 | 3761084 | 133057 | BC047388                 | 2.512695 | 1.652712 | 0.085264  | 2.8776755 |
| A_16_P18534261 | 9 | 3773949 | 3774008 | 230172 | BC047388                 | 2.371685 | 1.953037 | -0.129789 | 2.750555  |
| A_16_P02049939 | 9 | 3783317 | 3783376 | 200936 | BC047388                 | 2.324873 | 1.533871 | -0.279436 | 2.631633  |
| A_16_P18534301 | 9 | 3795626 | 3795685 | 230705 | chr9:003795626-003795685 | 2.113337 | 1.281118 | -0.515464 | 2.2520177 |
| A_16_P02049969 | 9 | 3809269 | 3809328 | 238976 | chr9:003809269-003809328 | 2.611738 | 1.775366 | 0.276391  | 2.940181  |
| A_14_P109891   | 9 | 3817677 | 3817736 | 231742 | GLIS3                    | 2.290077 | 1.495106 | -0.30314  | 2.6382647 |
| A_16_P18534390 | 9 | 3829918 | 3829977 | 181824 | GLIS3                    | 2.179345 | 1.491633 | -0.515414 | 2.3941324 |
| A_16_P02050032 | 9 | 3841630 | 3841689 | 39822  | GLIS3                    | 2.873961 | 1.998574 | 0.258807  | 3.1423042 |
| A_16_P02050032 | 9 | 3841630 | 3841689 | 86346  | GLIS3                    | 2.774449 | 2.042345 | 0.261984  | 3.111177  |
| A_16_P02050032 | 9 | 3841630 | 3841689 | 13545  | GLIS3                    | 2.860442 | 2.057713 | 0.307236  | 3.160581  |
| A_16_P18534453 | 9 | 3848757 | 3848816 | 142983 | GLIS3                    | 1.643383 | 0.616015 | -1.098183 | 1.7576901 |
| A_16_P38631085 | 9 | 3858065 | 3858124 | 185100 | GLIS3                    | 2.196812 | 1.490188 | -0.400635 | 2.519627  |
| A_16_P38631098 | 9 | 3865881 | 3865940 | 53235  | GLIS3                    | 1.619193 | 0.853636 | -1.010877 | 1.9890748 |
| A_16_P18534517 | 9 | 3873457 | 3873516 | 24947  | GLIS3                    | 1.999926 | 1.249346 | -0.625561 | 2.229026  |
| A_14_P138328   | 9 | 3888848 | 3888894 | 223556 | GLIS3                    | 2.100025 | 1.346067 | -0.534108 | 2.1285923 |
| A_16_P02050132 | 9 | 3895362 | 3895421 | 63710  | GLIS3                    | 2.376821 | 1.626253 | -0.312048 | 2.6045122 |
| A_16_P02050154 | 9 | 3906244 | 3906303 | 180984 | GLIS3                    | 2.443859 | 1.622318 | -0.093959 | 2.707304  |
| A_14_P104307   | 9 | 3922332 | 3922391 | 110022 | GLIS3                    | 1.723985 | 0.962645 | -0.882515 | 1.8707268 |
| A_16_P18534705 | 9 | 3931954 | 3932013 | 235403 | GLIS3                    | 1.697741 | 0.901271 | -0.69663  | 2.2738056 |
| A_16_P38631329 | 9 | 3939218 | 3939277 | 87136  | GLIS3                    | 1.816885 | 0.98263  | -0.862683 | 1.8849373 |
| A_16_P18534755 | 9 | 3945653 | 3945712 | 127211 | GLIS3                    | 1.733537 | 0.938836 | -0.96034  | 1.8994201 |
| A_16_P18534787 | 9 | 3955490 | 3955549 | 8547   | GLIS3                    | 1.889715 | 0.520982 | -0.054644 | 2.558685  |
| A_16_P18534810 | 9 | 3962272 | 3962331 | 22456  | GLIS3                    | 2.311015 | 1.51029  | -0.24292  | 2.5938418 |
| A_16_P18534837 | 9 | 3969350 | 3969409 | 54843  | GLIS3                    | 2.519858 | 1.877018 | 0.03585   | 2.7773936 |
| A_16_P18534851 | 9 | 3975467 | 3975526 | 25122  | GLIS3                    | 1.616939 | 0.790355 | -0.909182 | 1.6508995 |
| A_16_P18534860 | 9 | 3981024 | 3981083 | 186034 | GLIS3                    | 2.096306 | 1.253055 | -0.622179 | 2.2968166 |
| A_16_P38631463 | 9 | 3991260 | 3991319 | 118197 | GLIS3                    | 1.951172 | 0.991282 | -0.703848 | 2.0088093 |
| A_14_P122098   | 9 | 4002525 | 4002584 | 50229  | GLIS3                    | 1.957154 | 1.33109  | -0.60337  | 2.2281675 |

|                |   |         |         |        |                          |          |          |           |           |
|----------------|---|---------|---------|--------|--------------------------|----------|----------|-----------|-----------|
| A_16_P18534930 | 9 | 4008023 | 4008082 | 159737 | GLIS3                    | 2.431432 | 1.691343 | 0.125305  | 2.8672059 |
| A_16_P02050336 | 9 | 4013519 | 4013578 | 22829  | GLIS3                    | 2.521219 | 1.743535 | -0.171454 | 2.7834322 |
| A_16_P38631549 | 9 | 4019105 | 4019164 | 143344 | GLIS3                    | 1.917884 | 1.060189 | -0.903102 | 2.1426744 |
| A_16_P02050360 | 9 | 4026702 | 4026761 | 124637 | GLIS3                    | 2.322763 | 1.598986 | -0.046403 | 3.5021396 |
| A_16_P02050377 | 9 | 4035101 | 4035160 | 122104 | GLIS3                    | 2.518563 | 1.759177 | -0.120497 | 2.6838467 |
| A_16_P18535025 | 9 | 4041471 | 4041530 | 680    | GLIS3                    | 2.041092 | 1.210189 | -0.580445 | 2.2652583 |
| A_16_P38631639 | 9 | 4050233 | 4050292 | 238377 | GLIS3                    | 2.237448 | 1.489961 | -0.265186 | 2.5895996 |
| A_16_P18535068 | 9 | 4055626 | 4055685 | 180908 | GLIS3                    | 1.977491 | 1.097909 | -0.688881 | 2.1805625 |
| A_16_P18535095 | 9 | 4063029 | 4063088 | 228465 | GLIS3                    | 1.968352 | 1.219635 | -0.517696 | 2.100857  |
| A_16_P02050438 | 9 | 4068415 | 4068474 | 83964  | GLIS3                    | 2.179694 | 1.341488 | -0.33993  | 2.3196518 |
| A_16_P02050458 | 9 | 4077879 | 4077938 | 195027 | GLIS3                    | 1.810072 | 1.092776 | -0.539967 | 2.1832252 |
| A_16_P18535181 | 9 | 4091853 | 4091912 | 83010  | GLIS3                    | 2.260671 | 1.549882 | -0.07102  | 2.6623862 |
| A_16_P38631816 | 9 | 4106616 | 4106675 | 194471 | GLIS3                    | 2.102358 | 1.216866 | -0.671717 | 1.9423764 |
| A_16_P18535247 | 9 | 4111837 | 4111896 | 242207 | GLIS3                    | 1.963118 | 1.002997 | -0.727329 | 1.988367  |
| A_16_P18535270 | 9 | 4118618 | 4118677 | 120942 | GLIS3                    | 2.16868  | 1.384802 | -0.321353 | 2.5352275 |
| A_16_P18535281 | 9 | 4125075 | 4125134 | 153422 | GLIS3                    | 1.715669 | 1.292014 | -0.758634 | 2.060145  |
| A_16_P18535318 | 9 | 4135968 | 4136027 | 132305 | GLIS3                    | 1.580172 | 0.550936 | -1.222871 | 1.5853729 |
| A_14_P100760   | 9 | 4142060 | 4142119 | 10502  | GLIS3                    | 2.276806 | 1.404812 | -0.280214 | 2.5198188 |
| A_14_P200901   | 9 | 4146589 | 4146648 | 95156  | GLIS3                    | 1.973492 | 1.208286 | -0.438359 | 2.361483  |
| A_16_P18535375 | 9 | 4154149 | 4154208 | 128348 | GLIS3                    | 2.266167 | 1.465451 | -0.307745 | 2.4867623 |
| A_16_P18535407 | 9 | 4163348 | 4163407 | 212354 | GLIS3                    | 1.628872 | 0.962986 | -0.90361  | 1.982641  |
| A_16_P18535447 | 9 | 4181507 | 4181566 | 214832 | GLIS3                    | 2.058409 | 1.362789 | -0.316861 | 2.307025  |
| A_16_P18535471 | 9 | 4200276 | 4200335 | 213486 | GLIS3                    | 2.341767 | 1.62259  | -0.182088 | 2.5941722 |
| A_16_P38632105 | 9 | 4215484 | 4215543 | 166027 | GLIS3                    | 1.969642 | 1.340306 | -0.657558 | 2.1455512 |
| A_16_P18535573 | 9 | 4235080 | 4235139 | 130077 | GLIS3                    | 2.339767 | 1.510422 | -0.089878 | 2.5736654 |
| A_16_P18535592 | 9 | 4249876 | 4249935 | 161821 | GLIS3                    | 2.550052 | 1.835339 | -0.0697   | 2.784358  |
| A_16_P38632228 | 9 | 4267561 | 4267620 | 28427  | GLIS3                    | 2.322666 | 1.599884 | -0.184813 | 2.6571462 |
| A_16_P02050800 | 9 | 4286652 | 4286711 | 153046 | GLIS3                    | 2.6344   | 1.740554 | 0.114039  | 2.8922753 |
| A_16_P18535742 | 9 | 4299732 | 4299791 | 140093 | DQ438885                 | 1.696659 | 1.067584 | -0.936318 | 1.9047613 |
| A_16_P02050859 | 9 | 4319063 | 4319122 | 164970 | DQ438885                 | 1.89697  | 1.177882 | -0.897752 | 1.8772993 |
| A_16_P02050879 | 9 | 4329054 | 4329113 | 192465 | DQ438885                 | 2.485214 | 1.740114 | 0.203705  | 2.9593556 |
| A_16_P38632424 | 9 | 4339422 | 4339481 | 237835 | chr9:004339422-004339481 | 1.8044   | 1.082007 | -0.705844 | 1.95585   |
| A_16_P38632468 | 9 | 4352484 | 4352543 | 170508 | chr9:004352484-004352543 | 2.601064 | 1.781278 | 0.427131  | 3.047596  |
| A_16_P18535909 | 9 | 4364001 | 4364060 | 69764  | chr9:004364001-004364060 | 2.396818 | 1.779505 | 0.115489  | 2.7917492 |
| A_16_P02050954 | 9 | 4372484 | 4372543 | 138664 | chr9:004372484-004372543 | 2.655594 | 1.930598 | 0.380632  | 3.0226078 |
| A_16_P38632552 | 9 | 4383875 | 4383934 | 157415 | chr9:004383875-004383934 | 2.374564 | 1.284576 | -0.232336 | 2.5830562 |
| A_16_P18536009 | 9 | 4409992 | 4410051 | 30532  | chr9:004409992-004410051 | 2.375497 | 1.57323  | -0.089192 | 2.7639797 |
| A_16_P02051011 | 9 | 4418574 | 4418633 | 118868 | chr9:004418574-004418633 | 2.260559 | 1.159493 | -0.10684  | 2.1889825 |
| A_14_P113556   | 9 | 4434820 | 4434879 | 186166 | chr9:004434820-004434879 | 1.66794  | 0.971999 | -1.059804 | 1.8447517 |
| A_16_P18536083 | 9 | 4444773 | 4444832 | 223664 | chr9:004444773-004444832 | 2.339662 | 1.665056 | 0.001525  | 2.8133118 |
| A_16_P02051051 | 9 | 4455914 | 4455973 | 116044 | chr9:004455914-004455973 | 1.997081 | 1.252218 | -0.636928 | 2.1950893 |
| A_16_P38632703 | 9 | 4466124 | 4466183 | 154888 | chr9:004466124-004466183 | 1.438862 | 0.700377 | -1.257858 | 1.4183522 |
| A_16_P18536121 | 9 | 4473336 | 4473395 | 214362 | chr9:004473336-004473395 | 2.589556 | 1.839049 | 0.045062  | 2.817868  |
| A_16_P38632726 | 9 | 4479545 | 4479604 | 221555 | chr9:004479545-004479604 | 2.116242 | 1.212739 | -0.465688 | 2.255188  |
| A_14_P102455   | 9 | 4488207 | 4488266 | 147353 | SLC1A1                   | 1.792678 | 0.867641 | -1.182661 | 1.6613815 |
| A_16_P38632774 | 9 | 4493809 | 4493868 | 110353 | SLC1A1                   | 2.192335 | 1.167872 | -0.524466 | 2.2959077 |
| A_16_P02051109 | 9 | 4501092 | 4501151 | 152958 | SLC1A1                   | 2.13308  | 1.362045 | -0.364772 | 2.2815592 |
| A_16_P02051115 | 9 | 4506438 | 4506497 | 52755  | SLC1A1                   | 2.286635 | 1.523071 | -0.068199 | 2.645468  |
| A_14_P131198   | 9 | 4518230 | 4518289 | 129439 | SLC1A1                   | 2.072467 | 1.470089 | -0.306907 | 2.36556   |
| A_16_P18536267 | 9 | 4533057 | 4533116 | 186371 | SLC1A1                   | 1.526196 | 0.849972 | -1.432714 | 1.4982998 |
| A_16_P18536286 | 9 | 4538911 | 4538970 | 30127  | SLC1A1                   | 1.268985 | 0.668997 | -1.295554 | 1.4473116 |
| A_16_P38632904 | 9 | 4545292 | 4545351 | 56408  | SLC1A1                   | 2.048632 | 1.271375 | -0.512497 | 2.2995646 |
| A_16_P18536338 | 9 | 4556002 | 4556061 | 19351  | SLC1A1                   | 1.917809 | 1.281606 | -0.625661 | 2.1607645 |
| A_14_P117164   | 9 | 4565987 | 4566046 | 218121 | SLC1A1                   | 2.211285 | 1.526726 | -0.13289  | 2.6176388 |
| A_14_P105964   | 9 | 4577083 | 4577142 | 68151  | SLC1A1                   | 2.322287 | 1.3582   | -0.736275 | 2.4246976 |
| A_16_P02051250 | 9 | 4585482 | 4585541 | 126471 | AK000920                 | 2.60853  | 1.810925 | 0.120712  | 2.955775  |
| A_16_P02051260 | 9 | 4590692 | 4590751 | 21424  | C9orf68                  | 2.165954 | 1.527313 | -0.262331 | 2.4816408 |
| A_16_P02051282 | 9 | 4608034 | 4608093 | 9035   | C9orf68                  | 2.302249 | 1.528943 | -0.328535 | 2.3555436 |
| A_14_P121350   | 9 | 4617565 | 4617624 | 241163 | C9orf68                  | 1.860952 | 0.854739 | -0.886996 | 1.8657144 |
| A_16_P38633135 | 9 | 4624174 | 4624233 | 86263  | C9orf68                  | 1.823    | 0.812229 | -0.983003 | 2.191885  |
| A_16_P38633160 | 9 | 4630916 | 4630975 | 34172  | C9orf68                  | 1.481902 | 0.823039 | -1.271298 | 1.6315356 |
| A_16_P18536566 | 9 | 4639634 | 4639693 | 168157 | C9orf68                  | 2.680577 | 1.83374  | 0.293429  | 3.0030775 |
| A_16_P18536570 | 9 | 4645469 | 4645528 | 158707 | C9orf68                  | 2.040734 | 1.015337 | -0.170342 | 2.4997518 |
| A_16_P02051342 | 9 | 4651872 | 4651931 | 216780 | C9orf68                  | 1.907186 | 1.153997 | -0.450376 | 2.1505961 |
| A_16_P18536612 | 9 | 4661030 | 4661089 | 223357 | chr9:004661030-004661089 | 2.091503 | 1.350996 | -0.351599 | 2.3770602 |
| A_16_P18536618 | 9 | 4665456 | 4665515 | 53453  | chr9:004665456-004665515 | 2.515513 | 1.801141 | 0.109612  | 2.942799  |
| A_16_P18536631 | 9 | 4671887 | 4671946 | 30682  | CDC37L1                  | 2.092671 | 1.229057 | -0.575695 | 2.0602622 |
| A_16_P02051386 | 9 | 4678542 | 4678601 | 222497 | CDC37L1                  | 1.708159 | 0.917293 | -0.878092 | 1.8081881 |
| A_14_P132707   | 9 | 4687068 | 4687127 | 84575  | CDC37L1                  | 1.578775 | 0.916387 | -1.211203 | 1.4145486 |
| A_16_P18536687 | 9 | 4691926 | 4691985 | 242506 | CDC37L1                  | 1.703179 | 1.164312 | -0.709635 | 1.8290093 |
| A_16_P38633333 | 9 | 4696392 | 4696451 | 112917 | CDC37L1                  | 1.928735 | 1.166459 | -0.643404 | 1.9475052 |
| A_16_P18536720 | 9 | 4701116 | 4701175 | 32733  | BX640794                 | 2.360165 | 1.218676 | -0.275324 | 2.0742393 |
| A_16_P18536741 | 9 | 4708651 | 4708710 | 139522 | AK3                      | 1.708645 | 0.865082 | -1.169854 | 1.466967  |

|                |   |         |         |        |                          |          |          |           |           |
|----------------|---|---------|---------|--------|--------------------------|----------|----------|-----------|-----------|
| A_14_P115092   | 9 | 4714235 | 4714294 | 205664 | AK3                      | 1.886523 | 1.066747 | -0.743862 | 1.8134197 |
| A_16_P38633402 | 9 | 4724592 | 4724651 | 95987  | AK3                      | 1.763748 | 1.086782 | -0.885629 | 1.8299314 |
| A_14_P107187   | 9 | 4730392 | 4730451 | 167648 | AK3                      | 2.05733  | 1.356224 | -0.579449 | 2.1354113 |
| A_16_P18536792 | 9 | 4734770 | 4734829 | 7502   | chr9:004734770-004734829 | 1.704669 | 1.007764 | -0.772736 | 1.6623733 |
| A_16_P02051471 | 9 | 4752225 | 4752284 | 183287 | chr9:004752225-004752284 | 2.12731  | 1.436432 | -0.269132 | 1.9414232 |
| A_16_P02051477 | 9 | 4758744 | 4758803 | 5093   | chr9:004758744-004758803 | 2.640272 | 1.746827 | 0.271846  | 2.7366228 |
| A_16_P18536844 | 9 | 4771753 | 4771803 | 218717 | chr9:004771753-004771803 | 2.376343 | 1.755304 | 0.338162  | 2.509152  |
| A_14_P125252   | 9 | 4784084 | 4784143 | 186230 | RCL1                     | 2.009817 | 1.219421 | -0.60285  | 1.9654987 |
| A_16_P02051509 | 9 | 4798791 | 4798850 | 236738 | RCL1                     | 1.97665  | 1.369573 | -0.794141 | 1.4322873 |
| A_16_P18536889 | 9 | 4806748 | 4806807 | 161496 | RCL1                     | 1.611672 | 0.95894  | -1.027034 | 1.6625897 |
| A_16_P02051522 | 9 | 4812144 | 4812203 | 13185  | RCL1                     | 2.394752 | 1.626329 | -0.180334 | 2.5334065 |
| A_16_P18536918 | 9 | 4815650 | 4815709 | 15637  | RCL1                     | 1.847546 | 1.112231 | -0.697079 | 1.9285729 |
| A_16_P02051540 | 9 | 4819748 | 4819807 | 11708  | RCL1                     | 2.065636 | 1.365863 | -0.366021 | 2.148679  |
| A_16_P02051547 | 9 | 4823192 | 4823251 | 108246 | RCL1                     | 1.573263 | 0.892846 | -1.147221 | 1.4651203 |
| A_16_P18536955 | 9 | 4827123 | 4827182 | 179139 | RCL1                     | 2.510048 | 1.684531 | -0.131768 | 2.4526982 |
| A_16_P02051568 | 9 | 4831297 | 4831356 | 19342  | RCL1                     | 1.769388 | 0.996865 | -0.648016 | 1.8391964 |
| A_16_P02051579 | 9 | 4835518 | 4835577 | 150254 | RCL1                     | 2.471638 | 1.697803 | 0.10445   | 2.6130803 |
| A_16_P18537000 | 9 | 4839536 | 4839595 | 80398  | RCL1                     | 2.171992 | 1.384091 | -0.437339 | 2.2552228 |
| A_16_P18537015 | 9 | 4843002 | 4843061 | 127286 | RCL1                     | 2.149169 | 1.136854 | -0.525002 | 1.7672272 |
| A_16_P02051603 | 9 | 4846324 | 4846383 | 179881 | RCL1                     | 2.503673 | 1.508965 | 0.075598  | 2.4230459 |
| A_14_P123360   | 9 | 4850997 | 4851056 | 131089 | RCL1                     | 1.702295 | 1.116368 | -1.14236  | 1.4904643 |
| A_14_P201754   | 9 | 4851027 | 4851086 | 74091  | RCL1                     | 1.844363 | 1.065238 | -0.86285  | 1.4067148 |
| A_16_P02051623 | 9 | 4857864 | 4857923 | 202494 | AK021739                 | 2.65147  | 1.828033 | 0.008738  | 2.671652  |
| A_16_P02051629 | 9 | 4861146 | 4861205 | 46633  | AK021739                 | 2.28854  | 1.521794 | -0.184766 | 2.3044934 |
| A_16_P02051637 | 9 | 4866171 | 4866230 | 201887 | AK021739                 | 1.886826 | 1.275642 | -0.685212 | 1.8807391 |
| A_16_P38633764 | 9 | 4878799 | 4878858 | 193687 | chr9:004878799-004878858 | 2.329345 | 1.525927 | -0.13013  | 2.3691516 |
| A_16_P02051662 | 9 | 4885956 | 4886015 | 224434 | chr9:004885956-004886015 | 1.973881 | 1.298534 | -0.621579 | 1.8491777 |
| A_16_P18537134 | 9 | 4894693 | 4894752 | 132986 | chr9:004894693-004894752 | 1.875802 | 1.27735  | -0.664192 | 2.0042129 |
| A_16_P18537156 | 9 | 4903169 | 4903228 | 105428 | chr9:004903169-004903228 | 1.792989 | 1.082948 | -0.591671 | 1.6874777 |
| A_16_P18537167 | 9 | 4918438 | 4918497 | 1616   | chr9:004918438-004918497 | 1.814639 | 1.159895 | -0.69615  | 1.7186768 |
| A_16_P38633846 | 9 | 4929057 | 4929116 | 95238  | chr9:004929057-004929116 | 2.165019 | 1.389512 | -0.532852 | 2.241966  |
| A_16_P38633870 | 9 | 4936528 | 4936587 | 212600 | chr9:004936528-004936587 | 1.966075 | 1.365085 | -0.58377  | 2.0439484 |
| A_16_P18537225 | 9 | 4947148 | 4947207 | 240584 | chr9:004947148-004947207 | 1.985541 | 1.291264 | -0.365024 | 1.9875604 |
| A_16_P18537244 | 9 | 4960093 | 4960152 | 141059 | chr9:004960093-004960152 | 2.343931 | 1.571253 | -0.219338 | 2.3683474 |
| A_16_P18537260 | 9 | 4969564 | 4969623 | 236506 | chr9:004969564-004969623 | 1.676895 | 1.109109 | -0.860424 | 1.8667288 |
| A_16_P18537279 | 9 | 4975852 | 4975911 | 197821 | JAK2                     | 2.326775 | 1.529087 | -0.364178 | 2.4371483 |
| A_16_P18537311 | 9 | 4989198 | 4989257 | 171414 | JAK2                     | 1.643487 | 0.876447 | -0.986596 | 1.6234148 |
| A_16_P38633969 | 9 | 4999291 | 4999350 | 166288 | JAK2                     | 2.501769 | 1.762857 | 0.191123  | 2.6885116 |
| A_16_P38633985 | 9 | 5005830 | 5005889 | 137005 | JAK2                     | 2.071871 | 1.367333 | -0.403713 | 2.259201  |
| A_14_P105543   | 9 | 5012053 | 5012112 | 28332  | JAK2                     | 1.876678 | 1.170756 | -0.750583 | 1.9863454 |
| A_16_P02051790 | 9 | 5019766 | 5019825 | 171690 | JAK2                     | 1.657752 | 0.957188 | -1.125482 | 1.5569103 |
| A_16_P18537365 | 9 | 5027866 | 5027925 | 5842   | JAK2                     | 1.679004 | 0.861129 | -1.178043 | 1.5029224 |
| A_16_P18537384 | 9 | 5037501 | 5037560 | 187779 | JAK2                     | 1.967461 | 1.274955 | -0.543072 | 2.0096889 |
| A_16_P02051821 | 9 | 5044579 | 5044638 | 187847 | JAK2                     | 1.007309 | 0.470629 | -1.642518 | 1.0159416 |
| A_16_P38634079 | 9 | 5052940 | 5052999 | 78127  | JAK2                     | 1.3638   | 0.720971 | -1.400402 | 1.1228065 |
| A_16_P02051838 | 9 | 5059092 | 5059151 | 74409  | JAK2                     | 1.914033 | 1.141663 | -0.621577 | 1.8186041 |
| A_16_P38634126 | 9 | 5068283 | 5068342 | 145901 | JAK2                     | 1.607701 | 0.857324 | -1.323296 | 1.4027598 |
| A_16_P38634169 | 9 | 5080443 | 5080502 | 226196 | JAK2                     | 1.867268 | 1.116268 | -0.743798 | 1.7494156 |
| A_16_P02051887 | 9 | 5085740 | 5085799 | 215519 | JAK2                     | 1.915134 | 1.314159 | -0.364662 | 2.1586502 |
| A_16_P18537543 | 9 | 5099824 | 5099883 | 214011 | JAK2                     | 2.122443 | 1.419836 | -0.210477 | 2.3369796 |
| A_16_P38634241 | 9 | 5106731 | 5106790 | 194525 | JAK2                     | 1.627348 | 0.941296 | -0.870393 | 1.7319183 |
| A_14_P127099   | 9 | 5117767 | 5117826 | 228943 | JAK2                     | 1.967671 | 1.072406 | -0.732931 | 1.8733338 |
| A_14_P136058   | 9 | 5117827 | 5117886 | 114132 | JAK2                     | 1.773662 | 1.041096 | -0.711502 | 2.0887973 |
| A_16_P02051945 | 9 | 5130396 | 5130455 | 181863 | chr9:005130396-005130455 | 1.907387 | 1.309769 | -0.567038 | 2.0560408 |
| A_16_P02051946 | 9 | 5138840 | 5138888 | 94632  | chr9:005138840-005138888 | 1.602981 | 0.597    | -0.759443 | 1.2812512 |
| A_16_P18537608 | 9 | 5152145 | 5152204 | 218345 | chr9:005152145-005152204 | 1.871292 | 1.077098 | -1.097481 | 1.8576957 |
| A_14_P110162   | 9 | 5155709 | 5155768 | 72266  | INSL6                    | 1.276199 | 0.367264 | -1.663683 | 1.2661785 |
| A_16_P18537623 | 9 | 5166527 | 5166586 | 23592  | INSL6                    | 1.973275 | 1.140747 | -0.794367 | 2.0993948 |
| A_16_P18537639 | 9 | 5175255 | 5175314 | 184285 | INSL6                    | 2.689521 | 1.51312  | 0.285093  | 3.0307925 |
| A_16_P18537658 | 9 | 5183334 | 5183393 | 194300 | chr9:005183334-005183393 | 1.601927 | 0.835898 | -1.142224 | 1.6362514 |
| A_16_P02051990 | 9 | 5193717 | 5193776 | 81951  | chr9:005193717-005193776 | 1.581145 | 0.869205 | -1.278547 | 1.5600393 |
| A_16_P18537706 | 9 | 5201960 | 5202019 | 203672 | chr9:005201960-005202019 | 2.153298 | 1.348549 | 2.598441  | 2.2934046 |
| A_16_P38634390 | 9 | 5206903 | 5206962 | 61921  | chr9:005206903-005206962 | 1.817673 | 1.059875 | 2.086806  | 2.0517259 |
| A_16_P18537721 | 9 | 5211754 | 5211810 | 206350 | chr9:005211754-005211810 | 1.799654 | 1.404932 | 2.5229    | 2.4759383 |
| A_14_P132861   | 9 | 5221815 | 5221874 | 1818   | INSL4                    | 1.933282 | 1.142036 | 2.019321  | 1.8457067 |
| A_16_P02052021 | 9 | 5225765 | 5225824 | 78181  | chr9:005225765-005225824 | 1.864913 | 1.221165 | 1.993998  | 1.869459  |
| A_16_P18537747 | 9 | 5256340 | 5256397 | 306    | chr9:005256340-005256397 | 2.853047 | 1.826869 | 3.167243  | 2.9171262 |
| A_16_P18537764 | 9 | 5274731 | 5274775 | 104185 | chr9:005274731-005274775 | 1.767021 | 1.034808 | 2.208775  | 1.9956784 |
| A_16_P38634441 | 9 | 5281649 | 5281708 | 114010 | chr9:005281649-005281708 | 2.095258 | 1.421777 | 2.505984  | 2.2453716 |
| A_14_P116102   | 9 | 5289937 | 5289996 | 222314 | RLN2                     | 1.367633 | 0.796617 | 1.709468  | 1.418954  |
| A_16_P18537802 | 9 | 5298149 | 5298208 | 52469  | chr9:005298149-005298208 | 2.836292 | 1.741073 | 3.061043  | 2.8636644 |
| A_16_P38634503 | 9 | 5309472 | 5309531 | 85199  | chr9:005309472-005309531 | 2.126366 | 1.140663 | 2.070842  | 1.7919768 |
| A_16_P38634523 | 9 | 5315976 | 5316035 | 66391  | chr9:005315976-005316035 | 1.976622 | 0.962526 | 2.096778  | 1.8191409 |

|                |   |         |         |        |                          |          |          |          |           |
|----------------|---|---------|---------|--------|--------------------------|----------|----------|----------|-----------|
| A_14_P114773   | 9 | 5325065 | 5325124 | 130296 | RLN1                     | 2.258214 | 1.099203 | 2.228152 | 1.9571224 |
| A_16_P18537868 | 9 | 5330015 | 5330074 | 2136   | chr9:005330015-005330074 | 1.852497 | 1.17859  | 2.117419 | 1.9340224 |
| A_16_P18537876 | 9 | 5338569 | 5338628 | 111929 | chr9:005338569-005338628 | 1.069818 | 0.402277 | 1.34909  | 1.0853747 |
| A_16_P02052090 | 9 | 5342284 | 5342343 | 121387 | chr9:005342284-005342343 | 2.272262 | 1.491264 | 2.748927 | 2.5833414 |
| A_16_P02052104 | 9 | 5348182 | 5348241 | 84545  | C9orf46                  | 1.820619 | 1.096719 | 2.188857 | 1.9169798 |
| A_16_P18537925 | 9 | 5356453 | 5356512 | 184122 | C9orf46                  | 2.195809 | 1.335419 | 2.581044 | 2.2828157 |
| A_16_P38634630 | 9 | 5365424 | 5365483 | 26516  | C9orf46                  | 1.490425 | 0.834653 | 1.93074  | 1.7567899 |
| A_16_P18537962 | 9 | 5375239 | 5375298 | 51394  | C9orf46                  | 2.091781 | 1.49966  | 2.596066 | 2.4261599 |
| A_16_P02052155 | 9 | 5385733 | 5385792 | 193348 | C9orf46                  | 1.830349 | 0.626742 | 1.836884 | 1.4291992 |
| A_16_P18538023 | 9 | 5399965 | 5400024 | 221675 | C9orf46                  | 1.749416 | 1.016896 | 2.137409 | 2.0540113 |
| A_14_P116588   | 9 | 5410412 | 5410471 | 58135  | C9orf46                  | 2.008574 | 1.407403 | 2.278729 | 2.137813  |
| A_16_P18538052 | 9 | 5416040 | 5416099 | 191081 | C9orf46                  | 2.332682 | 1.466178 | 2.665316 | 2.5679312 |
| A_16_P18538067 | 9 | 5421993 | 5422052 | 220090 | C9orf46                  | 1.760117 | 0.967407 | 2.278634 | 1.9421796 |
| A_14_P127466   | 9 | 5427501 | 5427549 | 70539  | C9orf46                  | 1.830095 | 1.175505 | 2.24459  | 2.1293464 |
| A_16_P02052215 | 9 | 5437495 | 5437554 | 149273 | BC036853                 | 2.112654 | 1.36393  | 2.543279 | 2.710501  |
| A_16_P02052226 | 9 | 5442456 | 5442515 | 149444 | CD274                    | 2.107348 | 1.426988 | 2.524209 | 2.2674134 |
| A_16_P18538134 | 9 | 5447101 | 5447160 | 56984  | CD274                    | 2.331918 | 1.513157 | 2.930917 | 2.7440276 |
| A_14_P120124   | 9 | 5453902 | 5453961 | 18901  | CD274                    | 2.413986 | 1.632643 | 2.739432 | 2.604832  |
| A_16_P02052257 | 9 | 5458427 | 5458486 | 55932  | CD274                    | 2.210537 | 1.44736  | 2.667153 | 2.5364184 |
| A_16_P18538187 | 9 | 5470112 | 5470171 | 7733   | BC036853                 | 1.266406 | 0.614072 | 1.519814 | 1.1553696 |
| A_16_P02052283 | 9 | 5479269 | 5479328 | 109034 | BC036853                 | 2.178776 | 1.424208 | 2.896584 | 2.5641308 |
| A_16_P18538233 | 9 | 5488200 | 5488259 | 43542  | BC036853                 | 1.927167 | 1.19992  | 2.395863 | 1.9670738 |
| A_14_P111176   | 9 | 5500695 | 5500754 | 55329  | PDCD1LG2                 | 1.879395 | 1.261572 | 2.313174 | 2.1662421 |
| A_16_P02052317 | 9 | 5512516 | 5512575 | 11531  | PDCD1LG2                 | 2.065679 | 1.382145 | 2.405537 | 2.2754269 |
| A_16_P02052334 | 9 | 5523277 | 5523336 | 41464  | PDCD1LG2                 | 1.703796 | 1.381207 | 2.128775 | 2.275259  |
| A_16_P38635018 | 9 | 5528747 | 5528806 | 188593 | PDCD1LG2                 | 0.644083 | 1.28783  | 2.754661 | 2.327961  |
| A_14_P102548   | 9 | 5536660 | 5536719 | 9534   | PDCD1LG2                 | 2.17086  | 1.349114 | 2.682376 | 2.1028996 |
| A_16_P18538336 | 9 | 5542701 | 5542760 | 30559  | PDCD1LG2                 | 2.001329 | 1.153697 | 2.579108 | 2.0730324 |
| A_16_P18538355 | 9 | 5548534 | 5548593 | 11290  | PDCD1LG2                 | 2.476715 | 1.533866 | 3.054473 | 2.649994  |
| A_16_P18538373 | 9 | 5554309 | 5554368 | 122534 | PDCD1LG2                 | 2.348088 | 1.489787 | 2.767121 | 2.5442216 |
| A_16_P02052388 | 9 | 5560263 | 5560322 | 92416  | PDCD1LG2                 | 1.919991 | 1.258488 | 2.319753 | 1.9027396 |
| A_16_P02052397 | 9 | 5568591 | 5568650 | 161568 | BC036853                 | 2.050485 | 1.23179  | 2.38171  | 2.2287624 |
| A_16_P18538451 | 9 | 5587430 | 5587489 | 237919 | BC036853                 | 2.188953 | 1.489754 | 2.526555 | 2.438527  |
| A_16_P18538487 | 9 | 5605531 | 5605590 | 230612 | BC036853                 | 1.894889 | 1.166556 | 2.303689 | 1.9455326 |
| A_16_P18538503 | 9 | 5616011 | 5616070 | 148061 | BC036853                 | 2.460265 | 1.763951 | 3.020806 | 2.6158893 |
| A_16_P18538528 | 9 | 5623484 | 5623543 | 162450 | AL136875                 | 2.043762 | 1.238722 | 2.498626 | 2.2002103 |
| A_16_P18538533 | 9 | 5633829 | 5633888 | 179175 | AL136875                 | 1.939855 | 1.351222 | 2.305536 | 2.1099145 |
| A_16_P18538540 | 9 | 5647674 | 5647733 | 104490 | KIAA1432                 | 1.623614 | 0.962852 | 1.925648 | 1.6468334 |
| A_16_P02052482 | 9 | 5660083 | 5660142 | 173329 | KIAA1432                 | 1.797979 | 0.931472 | 2.147419 | 1.9948196 |
| A_16_P38635272 | 9 | 5666608 | 5666667 | 73183  | KIAA1432                 | 1.607435 | 0.915337 | 1.983385 | 1.453082  |
| A_16_P02052498 | 9 | 5679948 | 5680007 | 55527  | KIAA1432                 | 1.85406  | 1.128228 | 2.27397  | 1.9433649 |
| A_16_P18538598 | 9 | 5689927 | 5689986 | 93397  | KIAA1432                 | 2.124762 | 1.519205 | 2.507467 | 2.25884   |
| A_16_P38635330 | 9 | 5703843 | 5703902 | 174359 | KIAA1432                 | 1.812552 | 1.028162 | 2.092771 | 1.8596494 |
| A_16_P02052543 | 9 | 5710699 | 5710758 | 125327 | KIAA1432                 | 1.929507 | 1.190291 | 2.478855 | 2.2190228 |
| A_16_P18538662 | 9 | 5726990 | 5727049 | 167587 | KIAA1432                 | 2.006384 | 1.289332 | 2.385926 | 1.9927571 |
| A_16_P02052565 | 9 | 5735668 | 5735727 | 119725 | KIAA1432                 | 2.181935 | 1.483557 | 2.663766 | 2.4308856 |
| A_16_P02052588 | 9 | 5744878 | 5744937 | 9635   | KIAA1432                 | 1.61644  | 0.888106 | 1.949149 | 1.7348006 |
| A_16_P02052600 | 9 | 5753393 | 5753452 | 146665 | KIAA1432                 | 1.651306 | 0.946194 | 2.047117 | 1.7787523 |
| A_14_P201168   | 9 | 5758572 | 5758631 | 193290 | KIAA1432                 | 2.41499  | 1.729232 | 3.145937 | 2.628996  |
| A_14_P101695   | 9 | 5760926 | 5760985 | 117564 | KIAA1432                 | 1.019434 | 0.599605 | 1.170804 | 1.0821347 |
| A_14_P202469   | 9 | 5764592 | 5764651 | 200812 | AB037853                 | 1.58153  | 0.950434 | 2.068612 | 1.5394161 |
| A_16_P02052628 | 9 | 5775791 | 5775850 | 239594 | KIAA1815                 | 1.739133 | 1.085069 | 2.12552  | 1.793816  |
| A_16_P18538792 | 9 | 5782445 | 5782504 | 210097 | KIAA1815                 | 1.70841  | 1.141968 | 2.007891 | 1.874252  |
| A_16_P02052645 | 9 | 5791251 | 5791310 | 73643  | KIAA1815                 | 2.141364 | 1.43795  | 2.55843  | 2.2514958 |
| A_16_P38635584 | 9 | 5802871 | 5802930 | 18629  | KIAA1815                 | 2.133498 | 1.434139 | 2.581605 | 2.4245615 |
| A_16_P02052687 | 9 | 5815083 | 5815142 | 44732  | KIAA1815                 | 1.726888 | 1.028562 | 2.085892 | 1.7956588 |
| A_16_P18538885 | 9 | 5821028 | 5821087 | 11009  | KIAA1815                 | 2.370745 | 1.65798  | 2.785807 | 2.6643374 |
| A_16_P38635662 | 9 | 5833071 | 5833130 | 19257  | chr9:005833071-005833130 | 2.263586 | 1.468113 | 2.840779 | 2.480057  |
| A_16_P02052734 | 9 | 5843483 | 5843542 | 178604 | chr9:005843483-005843542 | 2.688967 | 1.940522 | 3.369474 | 3.017632  |
| A_16_P02052751 | 9 | 5854904 | 5854963 | 181513 | chr9:005854904-005854963 | 2.27153  | 1.471896 | 2.864699 | 2.447795  |
| A_16_P18539010 | 9 | 5871429 | 5871488 | 101973 | chr9:005871429-005871488 | 2.403298 | 1.835177 | 3.012899 | 2.7256985 |
| A_16_P38635796 | 9 | 5883013 | 5883072 | 195500 | MLANA                    | 2.365472 | 1.903266 | 2.992909 | 2.7182252 |
| A_14_P103344   | 9 | 5887594 | 5887646 | 103671 | MLANA                    | 2.647924 | 1.827119 | 3.113884 | 2.7459044 |
| A_14_P119048   | 9 | 5890207 | 5890266 | 57761  | MLANA                    | 1.844097 | 1.286258 | 2.190398 | 2.071557  |
| A_14_P124382   | 9 | 5898765 | 5898824 | 175857 | MLANA                    | 1.919264 | 1.336899 | 2.321507 | 2.056168  |
| A_16_P02052817 | 9 | 5903345 | 5903404 | 217635 | chr9:005903345-005903404 | 1.970044 | 1.451846 | 2.471095 | 2.3151438 |
| A_16_P38635860 | 9 | 5909395 | 5909454 | 158551 | KIAA2026                 | 1.718717 | 1.071394 | 1.93141  | 1.8387196 |
| A_16_P18539122 | 9 | 5914640 | 5914699 | 23555  | KIAA2026                 | 2.101242 | 1.690056 | 2.84653  | 2.5639577 |
| A_16_P18539153 | 9 | 5924955 | 5925014 | 201224 | KIAA2026                 | 1.44027  | 0.942365 | 2.010602 | 1.6932994 |
| A_16_P18539173 | 9 | 5931060 | 5931119 | 193848 | KIAA2026                 | 1.956371 | 1.576031 | 2.503579 | 2.289667  |
| A_16_P18539209 | 9 | 5941333 | 5941392 | 127098 | KIAA2026                 | 1.793015 | 1.037568 | 2.091538 | 1.9758724 |
| A_16_P18539237 | 9 | 5949198 | 5949257 | 26138  | BC108654                 | 1.808592 | 1.228699 | 2.007957 | 1.9529796 |
| A_14_P122666   | 9 | 5957327 | 5957386 | 65275  | BC108654                 | 2.340879 | 2.031473 | 2.570016 | 2.1885507 |



|                |   |         |         |        |                          |          |          |          |           |
|----------------|---|---------|---------|--------|--------------------------|----------|----------|----------|-----------|
| A_16_P18539280 | 9 | 5968795 | 5968854 | 5060   | chr9:005968795-005968854 | 2.26954  | 1.450064 | 2.722973 | 2.3802207 |
| A_16_P02052945 | 9 | 5978479 | 5978538 | 112574 | chr9:005978479-005978538 | 2.341527 | 1.561577 | 2.751362 | 2.4710703 |
| A_16_P18539313 | 9 | 5984467 | 5984526 | 176823 | chr9:005984467-005984526 | 2.044812 | 1.411031 | 2.444966 | 2.2326977 |
| A_16_P38636089 | 9 | 5989383 | 5989442 | 111115 | chr9:005989383-005989442 | 1.555683 | 1.073654 | 1.889779 | 1.6198102 |
| A_16_P18539350 | 9 | 5995102 | 5995161 | 203248 | chr9:005995102-005995161 | 1.989023 | 1.183276 | 2.330916 | 1.9786987 |
| A_16_P02052992 | 9 | 6004774 | 6004833 | 50117  | RANBP6                   | 1.630668 | 0.833292 | 1.84782  | 1.6365618 |
| A_16_P18539393 | 9 | 6009634 | 6009693 | 120306 | chr9:006009634-006009693 | 2.047248 | 1.276993 | 2.401532 | 1.999886  |
| A_16_P18539406 | 9 | 6017999 | 6018058 | 192616 | chr9:006017999-006018058 | 1.752243 | 1.105376 | 2.151689 | 1.8745136 |
| A_16_P18539417 | 9 | 6023590 | 6023649 | 85662  | chr9:006023590-006023649 | 2.308716 | 1.504037 | 3.230292 | 2.2659242 |
| A_16_P18539449 | 9 | 6045497 | 6045556 | 80411  | chr9:006045497-006045556 | 2.404727 | 1.425395 | 2.874098 | 2.186159  |
| A_16_P02053048 | 9 | 6062942 | 6063001 | 23016  | chr9:006062942-006063001 | 1.656868 | 1.212672 | 1.999313 | 1.8502239 |
| A_14_P122767   | 9 | 6089101 | 6089160 | 18219  | chr9:006089101-006089160 | 2.504553 | 1.608884 | 3.040534 | 2.7172985 |
| A_16_P18539609 | 9 | 6132473 | 6132532 | 188000 | chr9:006132473-006132532 | 2.048961 | 1.296359 | 2.34841  | 1.97314   |
| A_16_P02053128 | 9 | 6156682 | 6156741 | 137726 | chr9:006156682-006156741 | 1.476987 | 0.819565 | 1.602872 | 1.5911907 |
| A_16_P02053146 | 9 | 6179414 | 6179473 | 186299 | chr9:006179414-006179473 | 2.061527 | 1.075666 | 2.400955 | 2.1011333 |
| A_16_P02053157 | 9 | 6188539 | 6188598 | 72162  | chr9:006188539-006188598 | 2.090605 | 1.333916 | 2.448526 | 2.202852  |
| A_14_P119264   | 9 | 6205819 | 6205878 | 29576  | BC047085                 | 1.85898  | 0.948033 | 2.126144 | 1.9914778 |
| A_16_P18539756 | 9 | 6220796 | 6220855 | 33208  | BC047085                 | 2.272129 | 1.503394 | 2.633034 | 2.5421064 |
| A_16_P18539779 | 9 | 6228555 | 6228613 | 49708  | BC047085                 | 2.119024 | 1.309539 | 2.422876 | 2.15697   |
| A_14_P108559   | 9 | 6234664 | 6234723 | 181904 | IL33                     | 2.072974 | 1.312459 | 2.436374 | 2.3090436 |
| A_16_P02053224 | 9 | 6241214 | 6241273 | 58878  | IL33                     | 2.348327 | 1.562603 | 2.808623 | 2.5394025 |
| A_16_P38636577 | 9 | 6246061 | 6246120 | 75796  | IL33                     | 1.961877 | 1.225428 | 2.236458 | 2.0719626 |
| A_16_P18539825 | 9 | 6254454 | 6254513 | 202047 | chr9:006254454-006254513 | 1.821715 | 0.953179 | 2.241355 | 2.0967689 |
| A_14_P118373   | 9 | 6262516 | 6262575 | 180005 | chr9:006262516-006262575 | 2.141907 | 1.419981 | 2.611095 | 2.268967  |
| A_16_P38636627 | 9 | 6272907 | 6272966 | 167605 | chr9:006272907-006272966 | 2.403932 | 1.52515  | 2.759632 | 2.5830123 |
| A_16_P18539887 | 9 | 6292412 | 6292471 | 88422  | chr9:006292412-006292471 | 2.208012 | 1.438398 | 2.539893 | 2.053506  |
| A_16_P38636673 | 9 | 6302800 | 6302859 | 93733  | chr9:006302800-006302859 | 1.909829 | 1.176053 | 2.05197  | 1.9360911 |
| A_16_P18539919 | 9 | 6315108 | 6315167 | 408    | chr9:006315108-006315167 | 2.280039 | 1.632971 | 3.140182 | 2.3387315 |
| A_14_P102889   | 9 | 6318511 | 6318564 | 65296  | TPD52L3                  | 2.344147 | 1.697503 | 2.828963 | 2.6719525 |
| A_14_P130340   | 9 | 6320667 | 6320726 | 220729 | TPD52L3                  | 2.274761 | 1.749685 | 2.996129 | 2.6299086 |
| A_14_P129759   | 9 | 6321081 | 6321140 | 70257  | TPD52L3                  | 2.19556  | 1.359989 | 2.622703 | 2.1916895 |
| A_16_P38636717 | 9 | 6322918 | 6322968 | 218473 | chr9:006322918-006322968 | 2.225486 | 1.514718 | 3.010834 | 2.7548738 |
| A_16_P38636718 | 9 | 6339863 | 6339919 | 97786  | chr9:006339863-006339919 | 2.725263 | 1.86393  | 2.332175 | 2.9130702 |
| A_16_P18539974 | 9 | 6349593 | 6349652 | 123912 | chr9:006349593-006349652 | 1.560733 | 0.843998 | 1.730688 | 1.4066205 |
| A_16_P18539998 | 9 | 6387159 | 6387218 | 30374  | chr9:006387159-006387218 | 2.381787 | 1.511289 | 2.73372  | 2.4560637 |
| A_16_P18540014 | 9 | 6396603 | 6396662 | 211688 | chr9:006396603-006396662 | 1.605466 | 0.861086 | 1.727269 | 1.3948411 |
| A_14_P124207   | 9 | 6405111 | 6405170 | 138919 | UHRF2                    | 1.903001 | 0.997455 | 2.152458 | 1.875853  |
| A_16_P18540056 | 9 | 6410789 | 6410848 | 229582 | UHRF2                    | 2.057862 | 1.228665 | 2.283846 | 1.8987169 |
| A_16_P02053381 | 9 | 6421592 | 6421651 | 46067  | UHRF2                    | 1.288709 | 0.868736 | 1.941318 | 1.8160785 |
| A_16_P18540099 | 9 | 6429600 | 6429659 | 9276   | UHRF2                    | 0.897339 | 0.523105 | 1.2249   | 1.1285974 |
| A_16_P18540124 | 9 | 6441073 | 6441132 | 152364 | UHRF2                    | 1.837579 | 0.989927 | 2.211026 | 1.9568074 |
| A_16_P38636919 | 9 | 6450788 | 6450847 | 231390 | UHRF2                    | 1.670107 | 1.094586 | 2.052722 | 1.8534135 |
| A_14_P124483   | 9 | 6458389 | 6458448 | 113442 | UHRF2                    | 1.618104 | 0.915823 | 1.931323 | 1.7592247 |
| A_16_P18540169 | 9 | 6465338 | 6465397 | 241444 | UHRF2                    | 1.71924  | 1.102457 | 2.259921 | 2.014453  |
| A_16_P18540191 | 9 | 6476776 | 6476835 | 237975 | UHRF2                    | 1.885265 | 1.02932  | 2.024837 | 1.8566846 |
| A_16_P18540233 | 9 | 6491006 | 6491065 | 39069  | UHRF2                    | 2.207609 | 1.41785  | 2.33455  | 2.35481   |
| A_16_P02053487 | 9 | 6500132 | 6500191 | 234708 | chr9:006500132-006500191 | 1.945144 | 1.172146 | 2.071118 | 1.9917029 |
| A_16_P38637069 | 9 | 6507535 | 6507594 | 61898  | chr9:006507535-006507594 | 1.899954 | 1.322188 | 2.092212 | 2.0683756 |
| A_14_P104884   | 9 | 6516152 | 6516211 | 161930 | chr9:006516152-006516211 | 1.664626 | 0.857752 | 1.61048  | 1.6808283 |
| A_16_P02053523 | 9 | 6531400 | 6531459 | 63980  | GLDC                     | 1.719439 | 1.079003 | 1.856317 | 1.7606053 |
| A_16_P18540340 | 9 | 6537424 | 6537483 | 200638 | GLDC                     | 2.264613 | 1.523235 | 2.546684 | 2.4128838 |
| A_16_P38637185 | 9 | 6548442 | 6548501 | 164249 | GLDC                     | 2.834199 | 1.839699 | 2.910752 | 2.958831  |
| A_16_P18540411 | 9 | 6559981 | 6560036 | 186117 | GLDC                     | 1.777582 | 1.13802  | 1.92681  | 1.9446605 |
| A_16_P02053580 | 9 | 6565628 | 6565687 | 237239 | GLDC                     | 2.444531 | 1.564789 | 2.606668 | 2.209512  |
| A_16_P18540444 | 9 | 6574139 | 6574198 | 149441 | GLDC                     | 1.788668 | 1.088299 | 1.829213 | 1.7144744 |
| A_14_P119183   | 9 | 6582113 | 6582172 | 157262 | GLDC                     | 2.181129 | 1.494251 | 1.957035 | 2.1004834 |
| A_16_P18540476 | 9 | 6588697 | 6588756 | 162535 | GLDC                     | 2.585889 | 1.706392 | 2.44001  | 2.6024554 |
| A_16_P18540493 | 9 | 6594524 | 6594583 | 172078 | GLDC                     | 2.2062   | 1.446762 | 1.992504 | 2.1227148 |
| A_16_P38637330 | 9 | 6600940 | 6600999 | 152953 | GLDC                     | 1.711076 | 0.661085 | 1.328773 | 1.3855202 |
| A_14_P134429   | 9 | 6610160 | 6610214 | 25535  | GLDC                     | 2.289065 | 1.57245  | 2.186161 | 2.5501828 |
| A_16_P02053665 | 9 | 6623341 | 6623400 | 219604 | GLDC                     | 1.120994 | 1.592797 | 2.143761 | 2.2694247 |
| A_16_P38637409 | 9 | 6631759 | 6631818 | 190143 | GLDC                     | 1.338554 | 0.470839 | 1.01935  | 1.0858512 |
| A_16_P38637434 | 9 | 6641516 | 6641575 | 151162 | chr9:006641516-006641575 | 2.120055 | 1.386493 | 1.778373 | 1.6725593 |
| A_16_P18540622 | 9 | 6648841 | 6648900 | 50030  | chr9:006648841-006648900 | 2.017373 | 1.336913 | 1.70923  | 2.0039945 |
| A_16_P38637470 | 9 | 6662380 | 6662439 | 209538 | chr9:006662380-006662439 | 2.417753 | 1.581584 | 2.229968 | 2.3023884 |
| A_14_P111588   | 9 | 6684944 | 6685003 | 237842 | chr9:006684944-006685003 | 1.873657 | 1.190583 | 1.638896 | 1.8814509 |
| A_16_P18540712 | 9 | 6704941 | 6705000 | 57942  | chr9:006704941-006705000 | 1.835665 | 1.089592 | 1.439463 | 1.6165084 |
| A_16_P18540731 | 9 | 6716297 | 6716356 | 135008 | chr9:006716297-006716356 | 2.618692 | 1.770947 | 2.364075 | 2.0006785 |
| A_16_P18540737 | 9 | 6724596 | 6724655 | 234804 | chr9:006724596-006724655 | 2.46879  | 1.540114 | 2.160792 | 2.1512063 |
| A_16_P18540746 | 9 | 6733393 | 6733452 | 233010 | chr9:006733393-006733452 | 2.056925 | 1.171278 | 1.738667 | 2.1381216 |
| A_16_P02053761 | 9 | 6746371 | 6746430 | 49562  | chr9:006746371-006746430 | 2.600858 | 1.717567 | 2.34822  | 2.4755688 |
| A_16_P02053770 | 9 | 6753430 | 6753489 | 56500  | JMJD2C                   | 2.709864 | 2.047748 | 2.567099 | 2.6469383 |
| A_16_P18540809 | 9 | 6760235 | 6760294 | 2949   | JMJD2C                   | 2.320743 | 1.345977 | 2.068306 | 2.0334728 |

|                |   |         |         |        |                          |          |          |          |           |
|----------------|---|---------|---------|--------|--------------------------|----------|----------|----------|-----------|
| A_16_P02053791 | 9 | 6767815 | 6767874 | 182352 | JMJD2C                   | 2.297139 | 1.36731  | 1.769834 | 1.8421198 |
| A_16_P02053800 | 9 | 6773966 | 6774024 | 240717 | JMJD2C                   | 1.500512 | 0.708136 | 1.043565 | 1.3097326 |
| A_16_P02053809 | 9 | 6780884 | 6780943 | 240420 | JMJD2C                   | 2.272614 | 1.46776  | 1.988487 | 2.0964112 |
| A_16_P02053820 | 9 | 6787759 | 6787818 | 75219  | JMJD2C                   | 2.444176 | 1.597012 | 2.110833 | 2.0417295 |
| A_16_P38637711 | 9 | 6795980 | 6796039 | 168871 | JMJD2C                   | 2.208471 | 1.527037 | 1.95218  | 2.184903  |
| A_14_P126908   | 9 | 6804678 | 6804737 | 201190 | JMJD2C                   | 1.454898 | 0.534969 | 0.873538 | 1.160589  |
| A_16_P38637753 | 9 | 6813069 | 6813128 | 230315 | JMJD2C                   | 1.996337 | 1.254852 | 1.494561 | 1.8146279 |
| A_16_P18540962 | 9 | 6828207 | 6828266 | 59169  | JMJD2C                   | 2.139692 | 1.34097  | 1.738748 | 1.9965429 |
| A_16_P18540993 | 9 | 6838701 | 6838760 | 134794 | JMJD2C                   | 2.075483 | 1.437378 | 1.769456 | 2.188788  |
| A_14_P122422   | 9 | 6848179 | 6848238 | 116594 | JMJD2C                   | 2.143358 | 1.298795 | 1.868051 | 1.9026068 |
| A_16_P02053933 | 9 | 6861820 | 6861879 | 198477 | JMJD2C                   | 2.383836 | 1.357294 | 1.865354 | 2.1523027 |
| A_16_P18541084 | 9 | 6874498 | 6874557 | 26450  | JMJD2C                   | 1.96504  | 1.113277 | 1.647274 | 1.9073322 |
| A_14_P119617   | 9 | 6883176 | 6883235 | 103936 | JMJD2C                   | 2.237667 | 1.150039 | 1.545613 | 1.7764224 |
| A_16_P38637966 | 9 | 6896978 | 6897037 | 51551  | JMJD2C                   | 2.018258 | 1.203594 | 1.529127 | 1.8663162 |
| A_16_P18541191 | 9 | 6905644 | 6905703 | 156252 | JMJD2C                   | 1.697488 | 1.047838 | 1.339857 | 1.6706629 |
| A_16_P38638035 | 9 | 6913528 | 6913587 | 99725  | JMJD2C                   | 2.092396 | 1.261221 | 1.789454 | 2.0175023 |
| A_14_P123456   | 9 | 6923756 | 6923815 | 182928 | JMJD2C                   | 2.322436 | 1.582638 | 2.080459 | 2.3895254 |
| A_16_P18541261 | 9 | 6931525 | 6931584 | 241795 | JMJD2C                   | 2.450196 | 1.480801 | 2.040683 | 2.338663  |
| A_16_P18541280 | 9 | 6937618 | 6937677 | 172537 | JMJD2C                   | 2.111554 | 1.124264 | 1.570497 | 1.8480068 |
| A_16_P02054086 | 9 | 6942794 | 6942853 | 172855 | JMJD2C                   | 2.204348 | 1.475844 | 1.84634  | 2.1699333 |
| A_16_P18541341 | 9 | 6958665 | 6958724 | 238171 | JMJD2C                   | 1.668057 | 0.899626 | 1.170729 | 1.5038695 |
| A_14_P135386   | 9 | 6967940 | 6967999 | 105259 | JMJD2C                   | 2.029779 | 1.22159  | 1.604114 | 1.7520173 |
| A_16_P02054154 | 9 | 6974370 | 6974429 | 83304  | JMJD2C                   | 2.092536 | 1.284324 | 1.72848  | 2.0275822 |
| A_16_P18541419 | 9 | 6980907 | 6980966 | 96049  | JMJD2C                   | 1.999116 | 1.111723 | 1.486885 | 1.7285656 |
| A_16_P18541452 | 9 | 6990683 | 6990742 | 164028 | JMJD2C                   | 1.718777 | 0.766754 | 1.080612 | 1.4155433 |
| A_16_P18541472 | 9 | 6996858 | 6996917 | 232601 | JMJD2C                   | 1.540641 | 0.878538 | 1.018475 | 1.3384551 |
| A_16_P02054208 | 9 | 7003793 | 7003852 | 38944  | JMJD2C                   | 2.32688  | 1.508484 | 2.040837 | 2.3475726 |
| A_14_P114621   | 9 | 7019186 | 7019245 | 57468  | JMJD2C                   | 1.570842 | 0.569369 | 1.039645 | 1.1954265 |
| A_16_P18541537 | 9 | 7028243 | 7028302 | 101320 | JMJD2C                   | 1.417345 | 0.747335 | 1.089025 | 1.3445805 |
| A_16_P18541547 | 9 | 7033351 | 7033410 | 154913 | JMJD2C                   | 1.531199 | 0.65761  | 0.969742 | 1.3328505 |
| A_16_P18541566 | 9 | 7038808 | 7038867 | 97135  | JMJD2C                   | 1.793972 | 1.098824 | 1.37963  | 1.6896278 |
| A_16_P02054279 | 9 | 7047815 | 7047874 | 75159  | JMJD2C                   | 2.049311 | 1.557298 | 2.030327 | 2.0423641 |
| A_14_P117140   | 9 | 7058096 | 7058155 | 227404 | JMJD2C                   | 1.355146 | 0.713825 | 0.83221  | 1.1608498 |
| A_16_P18541654 | 9 | 7069629 | 7069688 | 160329 | JMJD2C                   | 2.199907 | 1.241417 | 1.741166 | 1.9836367 |
| A_16_P38638521 | 9 | 7079657 | 7079716 | 45691  | JMJD2C                   | 2.472057 | 1.609493 | 2.216048 | 2.4092064 |
| A_16_P18541717 | 9 | 7088178 | 7088237 | 226120 | JMJD2C                   | 1.987792 | 1.228646 | 1.647636 | 1.8854966 |
| A_14_P101010   | 9 | 7096343 | 7096402 | 235282 | JMJD2C                   | 2.23712  | 1.321204 | 1.780811 | 2.0356405 |
| A_16_P18541784 | 9 | 7107342 | 7107401 | 217407 | JMJD2C                   | 2.633852 | 1.667648 | 2.665038 | 2.7388067 |
| A_16_P02054419 | 9 | 7123384 | 7123443 | 239442 | JMJD2C                   | 2.57024  | 1.830507 | 2.107513 | 2.40438   |
| A_16_P18541853 | 9 | 7129465 | 7129524 | 184104 | JMJD2C                   | 2.185835 | 1.539897 | 1.920499 | 2.115437  |
| A_16_P18541878 | 9 | 7139781 | 7139840 | 161652 | JMJD2C                   | 2.192426 | 1.314392 | 1.894497 | 2.2320888 |
| A_16_P18541895 | 9 | 7145062 | 7145121 | 168707 | JMJD2C                   | 1.779732 | 0.896677 | 1.20216  | 1.5139909 |
| A_14_P123515   | 9 | 7160033 | 7160092 | 72131  | JMJD2C                   | 1.922896 | 1.104157 | 1.609697 | 1.6319634 |
| A_16_P38638802 | 9 | 7171314 | 7171373 | 72972  | chr9:007171314-007171373 | 2.025723 | 1.238319 | 1.61327  | 1.8737239 |
| A_16_P18541981 | 9 | 7178472 | 7178531 | 156443 | chr9:007178472-007178531 | 1.510541 | 0.916808 | 1.449918 | 1.6133206 |
| A_14_P109465   | 9 | 7192876 | 7192935 | 17897  | chr9:007192876-007192935 | 1.940118 | 1.094352 | 1.507903 | 1.7465464 |
| A_16_P18542061 | 9 | 7212414 | 7212473 | 142298 | chr9:007212414-007212473 | 2.11633  | 1.473611 | 1.694529 | 2.0568287 |
| A_16_P18542116 | 9 | 7235058 | 7235117 | 12449  | chr9:007235058-007235117 | 1.475405 | 0.968862 | 1.162606 | 1.4180942 |
| A_16_P02054626 | 9 | 7263688 | 7263747 | 39535  | chr9:007263688-007263747 | 2.371395 | 1.649787 | 2.107469 | 2.2288425 |
| A_16_P18542304 | 9 | 7319454 | 7319513 | 234052 | chr9:007319454-007319513 | 1.888253 | 1.131863 | 1.456192 | 1.6551163 |
| A_14_P105421   | 9 | 7356869 | 7356928 | 201785 | chr9:007356869-007356928 | 2.505129 | 1.61275  | 2.070757 | 2.352032  |
| A_16_P02054843 | 9 | 7396754 | 7396813 | 126785 | chr9:007396754-007396813 | 2.214155 | 1.492946 | 1.862738 | 2.0487535 |
| A_16_P02054872 | 9 | 7434397 | 7434456 | 163602 | chr9:007434397-007434456 | 1.800381 | 1.027152 | 1.244293 | 1.7730831 |
| A_14_P139891   | 9 | 7447792 | 7447851 | 213154 | chr9:007447792-007447851 | 1.569554 | 0.822293 | 1.089798 | 1.233531  |
| A_16_P02054914 | 9 | 7457889 | 7457948 | 34506  | chr9:007457889-007457948 | 2.433567 | 1.567264 | 2.140111 | 2.178553  |
| A_16_P18542693 | 9 | 7466036 | 7466095 | 139707 | chr9:007466036-007466095 | 2.258648 | 1.241575 | 1.763871 | 1.862348  |
| A_16_P18542733 | 9 | 7483625 | 7483684 | 61058  | chr9:007483625-007483684 | 2.208284 | 1.315254 | 1.697798 | 1.7575617 |
| A_16_P38639599 | 9 | 7495776 | 7495835 | 48523  | chr9:007495776-007495835 | 2.031804 | 1.221515 | 1.652539 | 1.7480873 |
| A_16_P18542873 | 9 | 7534498 | 7534557 | 159898 | chr9:007534498-007534557 | 2.081851 | 1.366493 | 1.72758  | 1.9267732 |
| A_16_P18542974 | 9 | 7575139 | 7575198 | 25421  | chr9:007575139-007575198 | 1.602014 | 0.999684 | 0.947745 | 1.693676  |
| A_16_P02055131 | 9 | 7598025 | 7598084 | 127580 | chr9:007598025-007598084 | 2.003763 | 1.305932 | 1.756353 | 1.9541702 |
| A_16_P18543055 | 9 | 7625806 | 7625865 | 99312  | chr9:007625806-007625865 | 2.124054 | 1.273401 | 1.647282 | 1.7513525 |
| A_14_P110790   | 9 | 7649807 | 7649866 | 92888  | chr9:007649807-007649866 | 1.803817 | 1.059054 | 1.341981 | 1.43952   |
| A_16_P02055221 | 9 | 7672729 | 7672788 | 43139  | chr9:007672729-007672788 | 2.159865 | 1.336103 | 1.82385  | 1.9064857 |
| A_16_P38640044 | 9 | 7700353 | 7700412 | 68538  | chr9:007700353-007700412 | 1.307627 | 0.329094 | 0.787823 | 0.8343857 |
| A_16_P18543259 | 9 | 7723767 | 7723826 | 180040 | chr9:007723767-007723826 | 2.051441 | 1.27614  | 1.584879 | 1.7940326 |
| A_16_P38640159 | 9 | 7751878 | 7751937 | 243053 | chr9:007751878-007751937 | 1.692903 | 0.798526 | 1.102631 | 1.3095328 |
| A_14_P113536   | 9 | 7769255 | 7769314 | 76672  | chr9:007769255-007769314 | 1.811178 | 1.024497 | NaN      | 1.5749608 |
| A_16_P18543387 | 9 | 7782148 | 7782207 | 211399 | chr9:007782148-007782207 | 1.404334 | 0.695146 | 0.909134 | 0.6907577 |
| A_16_P38640235 | 9 | 7786439 | 7786498 | 163587 | chr9:007786439-007786498 | 1.790486 | 0.867461 | 1.361643 | 1.5129372 |
| A_16_P18543418 | 9 | 7794748 | 7794807 | 31005  | chr9:007794748-007794807 | 2.071249 | 1.32094  | 1.835395 | 2.253879  |
| A_16_P02055371 | 9 | 7799142 | 7799201 | 181585 | chr9:007799142-007799201 | 2.084035 | 1.171591 | 1.74537  | 1.9286178 |
| A_16_P18543447 | 9 | 7806075 | 7806134 | 174574 | chr9:007806075-007806134 | 2.042767 | 1.273401 | 1.723566 | 1.9937882 |

|                |   |         |         |        |                          |          |           |          |            |
|----------------|---|---------|---------|--------|--------------------------|----------|-----------|----------|------------|
| A_16_P18543473 | 9 | 7817345 | 7817404 | 177571 | chr9:007817345-007817404 | 1.590509 | 0.81238   | 0.967108 | 1.440431   |
| A_16_P18543541 | 9 | 7850424 | 7850483 | 31551  | chr9:007850424-007850483 | 1.877043 | 1.117538  | 1.492417 | 1.946777   |
| A_16_P38640431 | 9 | 7877728 | 7877787 | 105841 | chr9:007877728-007877787 | 2.101565 | -0.100537 | 1.953703 | 0.64582783 |
| A_16_P18543703 | 9 | 7920913 | 7920972 | 237770 | chr9:007920913-007920972 | 1.661375 | 0.958481  | 1.568292 | 1.8166975  |
| A_14_P119597   | 9 | 7952282 | 7952341 | 13559  | chr9:007952282-007952341 | 2.137771 | 1.423214  | 1.887918 | 2.198226   |
| A_16_P38640721 | 9 | 7980675 | 7980734 | 85207  | chr9:007980675-007980734 | 2.034385 | 1.304805  | 1.828781 | 2.2088459  |
| A_16_P18543928 | 9 | 8004429 | 8004488 | 221947 | chr9:008004429-008004488 | 2.333427 | 1.602135  | 1.870119 | 2.2538176  |
| A_16_P38640835 | 9 | 8029875 | 8029934 | 111798 | chr9:008029875-008029934 | 1.987388 | 1.083839  | 1.436297 | 1.921865   |
| A_16_P18544005 | 9 | 8055133 | 8055192 | 208969 | chr9:008055133-008055192 | 2.169531 | 1.385685  | 1.909036 | 2.2702444  |
| A_16_P18544055 | 9 | 8084096 | 8084155 | 6956   | chr9:008084096-008084155 | 2.141069 | 1.353399  | 1.727052 | 2.1229482  |
| A_14_P138604   | 9 | 8106434 | 8106493 | 152884 | chr9:008106434-008106493 | 1.672743 | 0.935333  | 1.237468 | 1.6407543  |
| A_16_P18544205 | 9 | 8147531 | 8147590 | 97033  | chr9:008147531-008147590 | 2.430381 | 1.543678  | 2.018601 | 2.3991277  |
| A_16_P18544349 | 9 | 8207768 | 8207827 | 185699 | chr9:008207768-008207827 | 2.100549 | 1.323585  | 1.749011 | 2.0335586  |
| A_14_P103249   | 9 | 8256433 | 8256492 | 154516 | chr9:008256433-008256492 | 1.784336 | 1.104252  | 1.499314 | 1.9159373  |
| A_16_P02056081 | 9 | 8289920 | 8289979 | 150980 | chr9:008289920-008289979 | 1.731807 | 0.907403  | 1.181076 | 1.6087035  |
| A_16_P18544602 | 9 | 8299913 | 8299972 | 232588 | chr9:008299913-008299972 | 1.906432 | 1.330491  | 1.489627 | 2.102209   |
| A_14_P133738   | 9 | 8307372 | 8307431 | 68977  | PTPRD                    | 1.637844 | 1.197746  | 1.51971  | 1.9231409  |
| A_16_P18544643 | 9 | 8321541 | 8321598 | 149354 | PTPRD                    | 1.648018 | 1.014205  | 1.409585 | 1.2073087  |
| A_16_P18544664 | 9 | 8331065 | 8331124 | 188231 | PTPRD                    | 2.363025 | 1.600384  | 2.213906 | 2.5562897  |
| A_16_P18544696 | 9 | 8340800 | 8340859 | 214309 | PTPRD                    | 1.382081 | 0.782393  | 0.991447 | 1.3674407  |
| A_16_P02056168 | 9 | 8351089 | 8351148 | 57541  | PTPRD                    | 2.153616 | 1.272672  | 1.718047 | 2.1720424  |
| A_16_P38641589 | 9 | 8358946 | 8359005 | 30190  | PTPRD                    | 1.860722 | 0.851305  | 1.299573 | 1.7447821  |
| A_16_P02056203 | 9 | 8366582 | 8366641 | 153412 | PTPRD                    | 1.46489  | 0.714758  | 1.014262 | 1.4124081  |
| A_16_P02056233 | 9 | 8379216 | 8379275 | 26458  | PTPRD                    | 1.833454 | 0.930098  | 1.348562 | 1.7286702  |
| A_16_P02056271 | 9 | 8394560 | 8394619 | 32758  | PTPRD                    | 1.755269 | 0.972733  | 1.548077 | 1.9027729  |
| A_16_P02056291 | 9 | 8402746 | 8402805 | 19687  | PTPRD                    | 1.921964 | 1.07805   | 1.648167 | 1.9691285  |
| A_16_P18544942 | 9 | 8408869 | 8408928 | 214025 | PTPRD                    | 1.967121 | 1.30702   | 1.677925 | 2.196311   |
| A_16_P18544977 | 9 | 8418400 | 8418459 | 121112 | PTPRD                    | 1.569615 | 0.660463  | 0.961686 | 1.3252479  |
| A_16_P02056341 | 9 | 8426578 | 8426637 | 63260  | PTPRD                    | 1.787876 | 1.060771  | 1.253789 | 1.8278052  |
| A_16_P02056358 | 9 | 8435549 | 8435608 | 187542 | PTPRD                    | 1.892201 | 1.140717  | 1.572507 | 1.8721296  |
| A_16_P18545047 | 9 | 8441584 | 8441643 | 144729 | PTPRD                    | 2.506804 | 1.508465  | 2.278565 | 2.5334485  |
| A_16_P38641916 | 9 | 8450367 | 8450426 | 97472  | PTPRD                    | 2.014546 | 1.298338  | 1.667934 | 2.264097   |
| A_16_P02056402 | 9 | 8455462 | 8455521 | 159848 | PTPRD                    | 2.092827 | 1.218984  | 1.724271 | 2.0139275  |
| A_16_P02056419 | 9 | 8462415 | 8462474 | 176139 | PTPRD                    | 2.316312 | 1.323523  | 1.859968 | 2.0814042  |
| A_16_P18545140 | 9 | 8469165 | 8469224 | 165322 | PTPRD                    | 1.867349 | 0.941101  | 1.508135 | 1.8832022  |
| A_16_P02056444 | 9 | 8475268 | 8475327 | 40024  | PTPRD                    | 2.232407 | 1.456615  | 2.034301 | 2.342941   |
| A_16_P18545185 | 9 | 8482959 | 8483018 | 196234 | PTPRD                    | 2.156991 | 1.53263   | 2.019484 | 2.4779027  |
| A_16_P38642073 | 9 | 8494493 | 8494552 | 203287 | PTPRD                    | 1.99393  | 1.201082  | 1.63921  | 2.0679588  |
| A_16_P18545252 | 9 | 8501585 | 8501644 | 106919 | PTPRD                    | 1.877195 | 0.976115  | 1.432795 | 1.7141098  |
| A_14_P131834   | 9 | 8508294 | 8508353 | 9796   | PTPRD                    | 1.824921 | 1.10371   | 1.467215 | 1.7879     |
| A_16_P18545326 | 9 | 8522912 | 8522971 | 201254 | PTPRD                    | 2.068791 | 1.365004  | 1.8179   | 2.2608767  |
| A_16_P02056566 | 9 | 8532029 | 8532088 | 106833 | PTPRD                    | 2.292616 | 1.419624  | 1.90082  | 2.2488422  |
| A_16_P18545393 | 9 | 8543166 | 8543225 | 239382 | PTPRD                    | 1.971856 | 1.334266  | 1.78675  | 2.140151   |
| A_16_P18545434 | 9 | 8556794 | 8556853 | 21232  | PTPRD                    | 2.294803 | 1.465625  | 2.071973 | 2.3736825  |
| A_16_P18545455 | 9 | 8562742 | 8562801 | 41121  | PTPRD                    | 2.017585 | 1.118653  | 1.614503 | 2.1353898  |
| A_16_P38642332 | 9 | 8572032 | 8572091 | 141442 | PTPRD                    | 1.353761 | 0.651072  | 0.930191 | 1.3277637  |
| A_16_P18545509 | 9 | 8580577 | 8580636 | 54512  | PTPRD                    | 1.918324 | 1.101067  | 1.54422  | 1.9252872  |
| A_16_P02056673 | 9 | 8585863 | 8585922 | 80141  | PTPRD                    | 1.738807 | 0.927472  | 1.38416  | 1.8270714  |
| A_16_P18545544 | 9 | 8592177 | 8592236 | 55419  | PTPRD                    | 2.069671 | 1.323746  | 1.793735 | 2.1900816  |
| A_16_P18545576 | 9 | 8602204 | 8602263 | 172596 | PTPRD                    | 1.598143 | 0.946326  | 1.240753 | 1.6634321  |
| A_16_P38642446 | 9 | 8608494 | 8608553 | 24652  | PTPRD                    | 1.923774 | 1.178875  | 1.526295 | 2.057056   |
| A_16_P38642482 | 9 | 8619537 | 8619596 | 237811 | PTPRD                    | 1.937856 | 1.23448   | 1.470439 | 1.9400097  |
| A_14_P134087   | 9 | 8626698 | 8626757 | 96051  | PTPRD                    | 1.734896 | 1.040941  | 1.36634  | 1.8804274  |
| A_16_P18545699 | 9 | 8638776 | 8638835 | 35846  | PTPRD                    | 1.753296 | 0.9671    | 1.447512 | 1.9623711  |
| A_16_P02056795 | 9 | 8644149 | 8644208 | 221752 | PTPRD                    | 1.571169 | 0.818217  | 1.041836 | 1.5906951  |
| A_16_P18545732 | 9 | 8649354 | 8649413 | 7354   | PTPRD                    | 1.729337 | 1.076242  | 1.434528 | 1.8092197  |
| A_16_P38642597 | 9 | 8655581 | 8655640 | 162186 | PTPRD                    | 2.039595 | 1.213349  | 1.645939 | 2.1236222  |
| A_16_P18545773 | 9 | 8661827 | 8661886 | 47634  | PTPRD                    | 1.708685 | 0.989974  | 1.279613 | 1.6386578  |
| A_16_P02056848 | 9 | 8670463 | 8670522 | 197626 | PTPRD                    | 1.690163 | 0.807485  | 1.128089 | 1.3168544  |
| A_16_P18545842 | 9 | 8681889 | 8681948 | 53544  | PTPRD                    | 2.010705 | 1.526299  | 2.011293 | 2.4143012  |
| A_16_P18545870 | 9 | 8689993 | 8690052 | 53263  | PTPRD                    | 1.856549 | 0.732257  | 1.620025 | 2.119555   |
| A_16_P18545898 | 9 | 8699750 | 8699809 | 43072  | PTPRD                    | 1.936689 | 1.200535  | 1.589307 | 1.8953227  |
| A_16_P38642770 | 9 | 8708615 | 8708674 | 166663 | PTPRD                    | 2.009072 | 1.308794  | 1.789432 | 2.2375407  |
| A_16_P18545955 | 9 | 8717555 | 8717614 | 4864   | PTPRD                    | 2.146255 | 1.504208  | 1.852054 | 2.227934   |
| A_16_P18545973 | 9 | 8722920 | 8722979 | 32853  | PTPRD                    | 2.00919  | 1.163238  | 1.746606 | 2.1270685  |
| A_16_P38642830 | 9 | 8728245 | 8728304 | 204956 | PTPRD                    | 2.055907 | 1.379578  | 1.912821 | 2.0106375  |
| A_16_P02056970 | 9 | 8733456 | 8733515 | 121698 | PTPRD                    | 1.959018 | 1.238866  | 1.629038 | 2.0129023  |
| A_16_P18546022 | 9 | 8741167 | 8741226 | 200034 | PTPRD                    | 1.522077 | 0.669256  | 1.190867 | 1.607383   |
| A_16_P18546032 | 9 | 8746447 | 8746506 | 228660 | PTPRD                    | 1.253282 | 0.501123  | 0.840615 | 1.0209441  |
| A_16_P02057007 | 9 | 8759633 | 8759692 | 27019  | PTPRD                    | 2.045514 | 1.133554  | 1.60029  | 1.9390258  |
| A_16_P18546085 | 9 | 8765946 | 8766005 | 227800 | PTPRD                    | 1.852264 | 0.927535  | 1.410544 | 1.8090369  |
| A_16_P02057033 | 9 | 8772944 | 8773003 | 186216 | PTPRD                    | 2.02515  | 1.205622  | 1.70068  | 2.123841   |
| A_16_P38642971 | 9 | 8778656 | 8778715 | 192729 | PTPRD                    | 1.972003 | 1.155091  | 1.673999 | 2.1004868  |

|                |   |         |         |        |       |          |          |           |           |
|----------------|---|---------|---------|--------|-------|----------|----------|-----------|-----------|
| A_16_P18546148 | 9 | 8785002 | 8785061 | 136080 | PTPRD | 1.730497 | 0.891715 | 1.161218  | 1.7388963 |
| A_16_P02057082 | 9 | 8797702 | 8797761 | 152714 | PTPRD | 2.199272 | 1.386402 | 1.657626  | 2.18887   |
| A_16_P38643046 | 9 | 8802777 | 8802836 | 158574 | PTPRD | 2.082335 | 1.318205 | 1.907291  | 2.3119967 |
| A_16_P02057111 | 9 | 8810794 | 8810853 | 117300 | PTPRD | 1.721896 | 0.942409 | 1.270437  | 1.6073929 |
| A_16_P18546259 | 9 | 8823200 | 8823259 | 15013  | PTPRD | 1.520074 | 0.856913 | 1.498249  | 1.5330747 |
| A_14_P124062   | 9 | 8832502 | 8832561 | 190779 | PTPRD | 1.60708  | 0.682623 | 1.053552  | 1.396321  |
| A_16_P18546321 | 9 | 8841903 | 8841962 | 72277  | PTPRD | 1.863614 | 0.943031 | 0.879811  | 1.6405656 |
| A_16_P18546351 | 9 | 8850151 | 8850210 | 203992 | PTPRD | 1.784828 | 0.986206 | 1.343279  | 1.7889471 |
| A_16_P18546390 | 9 | 8861565 | 8861624 | 117967 | PTPRD | 1.752381 | 0.692282 | 1.32384   | 1.7579789 |
| A_16_P18546443 | 9 | 8875919 | 8875978 | 118943 | PTPRD | 2.083175 | 1.34623  | 1.670203  | 2.1195369 |
| A_16_P18546458 | 9 | 8881036 | 8881095 | 191999 | PTPRD | 1.896551 | 1.248909 | 1.617193  | 1.9350392 |
| A_16_P02057272 | 9 | 8893382 | 8893441 | 23689  | PTPRD | 2.378378 | 1.176016 | 1.676476  | 2.1711955 |
| A_16_P38643351 | 9 | 8903114 | 8903173 | 154555 | PTPRD | 1.655933 | 0.761291 | 1.173744  | 1.4839523 |
| A_16_P18546524 | 9 | 8908793 | 8908852 | 88179  | PTPRD | 1.667007 | 0.941928 | 1.237555  | 1.6850367 |
| A_16_P18546554 | 9 | 8923995 | 8924054 | 27676  | PTPRD | 1.666703 | 0.976174 | 1.427888  | 1.575663  |
| A_16_P38643412 | 9 | 8931713 | 8931772 | 128976 | PTPRD | 2.330817 | 1.391572 | 1.753943  | 2.4042816 |
| A_16_P02057327 | 9 | 8937531 | 8937590 | 195219 | PTPRD | 1.788808 | 1.017808 | 1.372746  | 1.8432704 |
| A_16_P18546610 | 9 | 8945956 | 8946015 | 85266  | PTPRD | 1.627882 | 1.02234  | 1.270128  | 1.7760742 |
| A_16_P02057352 | 9 | 8951722 | 8951781 | 31217  | PTPRD | 1.837624 | 0.936806 | 1.289173  | 1.8569393 |
| A_16_P02057362 | 9 | 8962137 | 8962196 | 153879 | PTPRD | 2.406577 | 1.586683 | 2.135673  | 2.5618072 |
| A_16_P18546663 | 9 | 8968842 | 8968901 | 141297 | PTPRD | 1.721434 | 0.816601 | 1.298607  | 1.3621119 |
| A_16_P18546678 | 9 | 8974083 | 8974142 | 149622 | PTPRD | 1.647826 | 0.743761 | 1.160043  | 1.529373  |
| A_16_P18546705 | 9 | 8982038 | 8982097 | 6449   | PTPRD | 2.158411 | 1.346424 | 1.794003  | 2.159443  |
| A_16_P18546736 | 9 | 8993820 | 8993879 | 216000 | PTPRD | 2.086337 | 1.244437 | 1.711886  | 2.122356  |
| A_16_P38643604 | 9 | 9004802 | 9004861 | 14509  | PTPRD | 1.589829 | 1.02658  | 1.5969    | 2.0150995 |
| A_16_P38643641 | 9 | 9018125 | 9018184 | 228664 | PTPRD | 2.056171 | 1.253408 | 1.659057  | 1.9982681 |
| A_16_P38643666 | 9 | 9026005 | 9026064 | 47156  | PTPRD | 1.913171 | 1.153311 | 1.416151  | 1.9735509 |
| A_16_P18546859 | 9 | 9033312 | 9033371 | 44886  | PTPRD | 1.744248 | 0.855821 | 1.218225  | 1.6404291 |
| A_16_P18546885 | 9 | 9043325 | 9043384 | 20666  | PTPRD | 1.838871 | 0.998392 | 1.328436  | 1.7845508 |
| A_16_P18546911 | 9 | 9051321 | 9051380 | 41108  | PTPRD | 1.75742  | 0.892446 | 1.153323  | 1.861683  |
| A_16_P18546933 | 9 | 9059514 | 9059573 | 166280 | PTPRD | 2.278011 | 1.468818 | 2.049922  | 2.4224918 |
| A_16_P18546953 | 9 | 9067923 | 9067982 | 109936 | PTPRD | 1.610216 | 0.926013 | 0.93577   | 1.6563433 |
| A_16_P18546962 | 9 | 9075487 | 9075546 | 111117 | PTPRD | 1.763773 | 0.90113  | 1.120095  | 1.5617222 |
| A_16_P38643813 | 9 | 9082111 | 9082170 | 2003   | PTPRD | 1.553223 | 0.725399 | 1.096817  | 1.4727464 |
| A_16_P38643836 | 9 | 9091605 | 9091664 | 233538 | PTPRD | 1.936047 | 1.121023 | 1.838108  | 1.9095155 |
| A_16_P18547049 | 9 | 9104504 | 9104563 | 142942 | PTPRD | 1.815383 | 0.946352 | 1.652489  | 1.7691089 |
| A_16_P18547073 | 9 | 9112101 | 9112160 | 225390 | PTPRD | 1.575527 | 0.945121 | 1.470329  | 1.643974  |
| A_16_P38643928 | 9 | 9120371 | 9120430 | 13333  | PTPRD | 1.886093 | 0.949496 | 1.528371  | 1.4288985 |
| A_16_P02057659 | 9 | 9139965 | 9140024 | 104168 | PTPRD | 1.762503 | 0.8811   | 1.553337  | 1.7230293 |
| A_16_P18547196 | 9 | 9159262 | 9159321 | 230185 | PTPRD | 1.764817 | 0.94057  | 1.384003  | 1.5192881 |
| A_16_P18547229 | 9 | 9169013 | 9169072 | 107155 | PTPRD | 1.680748 | 0.91302  | 1.54394   | 1.5042422 |
| A_16_P18547271 | 9 | 9185377 | 9185436 | 229846 | PTPRD | 1.840413 | 0.97387  | 1.459521  | 1.6871953 |
| A_16_P18547319 | 9 | 9203376 | 9203435 | 15432  | PTPRD | 1.874871 | 1.190149 | 1.824311  | 1.6933638 |
| A_14_P138484   | 9 | 9215465 | 9215524 | 6778   | PTPRD | 2.036709 | 1.240441 | 1.799315  | 1.8947451 |
| A_16_P18547383 | 9 | 9225900 | 9225959 | 228673 | PTPRD | 1.853628 | 1.103056 | 1.621894  | 1.7894905 |
| A_16_P18547405 | 9 | 9241954 | 9242013 | 194570 | PTPRD | 1.560978 | 0.872099 | 1.192905  | 1.3036786 |
| A_16_P18547434 | 9 | 9251214 | 9251273 | 39735  | PTPRD | 2.150416 | 1.426719 | 2.050257  | 2.036709  |
| A_16_P18547480 | 9 | 9272791 | 9272850 | 65104  | PTPRD | 2.263079 | 1.502999 | 1.96242   | 2.1343112 |
| A_16_P18547505 | 9 | 9282196 | 9282255 | 110174 | PTPRD | 1.54899  | 0.851764 | 1.361704  | 1.2459193 |
| A_16_P18547546 | 9 | 9298181 | 9298240 | 204940 | PTPRD | 2.097475 | 1.435756 | 2.188587  | 2.0641403 |
| A_16_P18547587 | 9 | 9310906 | 9310965 | 56513  | PTPRD | 2.076266 | 1.299114 | 1.887185  | 1.9102757 |
| A_16_P18547628 | 9 | 9325203 | 9325262 | 15261  | PTPRD | 2.072442 | 1.07892  | 1.238651  | 1.2551085 |
| A_14_P107785   | 9 | 9335062 | 9335121 | 159753 | PTPRD | 1.627051 | 0.792849 | 1.695208  | 1.5059496 |
| A_16_P18547717 | 9 | 9353262 | 9353321 | 85642  | PTPRD | 1.955123 | 1.392276 | 1.967047  | 1.8312317 |
| A_16_P18547744 | 9 | 9366449 | 9366508 | 32914  | PTPRD | 1.65046  | 1.014819 | 1.455179  | 1.3741796 |
| A_16_P02058038 | 9 | 9375635 | 9375694 | 34562  | PTPRD | 2.07163  | 1.370455 | 1.796632  | 2.2092655 |
| A_16_P02058066 | 9 | 9390269 | 9390328 | 41529  | PTPRD | 2.171897 | 1.286308 | -1.575216 | 2.1067204 |
| A_16_P18547840 | 9 | 9401421 | 9401480 | 14616  | PTPRD | 2.015576 | 1.424967 | -1.527496 | 1.9026623 |
| A_16_P18547896 | 9 | 9423588 | 9423647 | 168956 | PTPRD | 1.336346 | 0.655682 | -2.590909 | 1.1206524 |
| A_14_P130978   | 9 | 9443833 | 9443892 | 71046  | PTPRD | 1.271976 | 0.712424 | -2.009073 | 1.1275438 |
| A_16_P18547982 | 9 | 9452886 | 9452945 | 79283  | PTPRD | 1.737906 | 1.07754  | -1.981027 | 1.3809714 |
| A_16_P18548017 | 9 | 9465324 | 9465383 | 21012  | PTPRD | 1.597079 | 0.794428 | -2.056365 | 1.4235065 |
| A_16_P18548055 | 9 | 9476593 | 9476652 | 15815  | PTPRD | 1.653074 | 0.956516 | 1.521275  | 1.5274097 |
| A_16_P18548064 | 9 | 9487786 | 9487845 | 164922 | PTPRD | 1.800878 | 0.786292 | 1.503844  | 1.539528  |
| A_16_P18548135 | 9 | 9511545 | 9511604 | 139517 | PTPRD | 2.081005 | 1.302618 | -0.584691 | 2.0265574 |
| A_16_P18548179 | 9 | 9527608 | 9527667 | 39650  | PTPRD | 1.366525 | 0.598371 | -1.507986 | 1.2870415 |
| A_16_P18548209 | 9 | 9542560 | 9542619 | 241909 | PTPRD | 1.695379 | 1.075537 | -0.875537 | 1.7354589 |
| A_16_P18548249 | 9 | 9557477 | 9557536 | 184428 | PTPRD | 1.813791 | 0.997978 | -1.000789 | 1.5812823 |
| A_16_P18548297 | 9 | 9574584 | 9574643 | 231748 | PTPRD | 1.691541 | 1.134054 | -1.044935 | 1.6776028 |
| A_16_P18548345 | 9 | 9591018 | 9591077 | 92224  | PTPRD | 2.141013 | 1.44239  | -0.320115 | 2.1393251 |
| A_14_P101993   | 9 | 9612217 | 9612276 | 104157 | PTPRD | 1.659893 | 0.899144 | -1.016213 | 1.336197  |
| A_16_P18548458 | 9 | 9623899 | 9623958 | 143471 | PTPRD | 1.668945 | 1.001672 | -0.949669 | 1.5287014 |
| A_16_P18548483 | 9 | 9634352 | 9634411 | 115926 | PTPRD | 2.165759 | 1.398893 | -0.571617 | 1.9757812 |

|                |   |          |          |        |                          |          |           |           |           |
|----------------|---|----------|----------|--------|--------------------------|----------|-----------|-----------|-----------|
| A_16_P18548522 | 9 | 9651633  | 9651692  | 222439 | PTPRD                    | 1.743331 | 0.794493  | -1.288301 | 1.4833692 |
| A_16_P18548555 | 9 | 9662075  | 9662134  | 44351  | PTPRD                    | 1.892634 | 1.146056  | -0.728507 | 1.7857078 |
| A_16_P18548601 | 9 | 9678509  | 9678568  | 202181 | PTPRD                    | 1.558498 | 0.751238  | -1.329583 | 1.2927532 |
| A_16_P18548623 | 9 | 9694304  | 9694363  | 232119 | PTPRD                    | 1.604576 | 0.705717  | -1.602935 | 1.2152559 |
| A_16_P18548650 | 9 | 9702960  | 9703019  | 81376  | PTPRD                    | 2.041455 | 1.220557  | -0.688997 | 1.8677152 |
| A_16_P18548669 | 9 | 9711702  | 9711761  | 13849  | PTPRD                    | 2.266597 | 1.44019   | -0.461885 | 2.076301  |
| A_16_P18548713 | 9 | 9725748  | 9725807  | 124057 | PTPRD                    | 1.775942 | 1.099137  | -1.263886 | 1.513265  |
| A_16_P18548778 | 9 | 9747813  | 9747872  | 136022 | PTPRD                    | 1.820323 | 0.969502  | -0.995806 | 1.5759658 |
| A_16_P18548800 | 9 | 9756235  | 9756294  | 52525  | PTPRD                    | 1.578925 | 0.513692  | -1.311754 | 1.0675466 |
| A_16_P18548844 | 9 | 9772827  | 9772886  | 224841 | PTPRD                    | 1.55604  | 0.907998  | -1.069215 | 1.3771169 |
| A_16_P38645696 | 9 | 9783019  | 9783078  | 144701 | PTPRD                    | 1.690585 | 0.906888  | -0.987982 | 1.3144261 |
| A_14_P123159   | 9 | 9793920  | 9793979  | 234711 | PTPRD                    | 2.115712 | 1.22918   | -0.854398 | 1.7507347 |
| A_16_P38645749 | 9 | 9807232  | 9807291  | 17262  | PTPRD                    | 1.552562 | 1.326171  | -0.805874 | 1.4414743 |
| A_16_P18548951 | 9 | 9818819  | 9818878  | 22480  | PTPRD                    | 1.479518 | 0.747508  | -1.394488 | 1.191356  |
| A_16_P18549001 | 9 | 9838129  | 9838188  | 1133   | PTPRD                    | 1.080872 | 0.266072  | -2.33717  | 0.5181279 |
| A_16_P18549038 | 9 | 9851130  | 9851189  | 21949  | PTPRD                    | 2.113465 | 1.211967  | -0.741849 | 1.8514085 |
| A_16_P18549077 | 9 | 9862073  | 9862132  | 7501   | PTPRD                    | 1.922347 | 1.065602  | -0.912097 | 1.6504918 |
| A_16_P18549109 | 9 | 9870763  | 9870822  | 227467 | PTPRD                    | 1.917163 | 1.229018  | -0.825484 | 1.7633162 |
| A_16_P38645951 | 9 | 9881585  | 9881644  | 215472 | PTPRD                    | 1.682409 | 0.86559   | -1.269643 | 1.6478693 |
| A_16_P18549171 | 9 | 9895054  | 9895113  | 108020 | PTPRD                    | 1.990719 | 1.136092  | -0.795757 | 2.0425587 |
| A_16_P38646037 | 9 | 9915681  | 9915740  | 205351 | PTPRD                    | 1.719247 | 0.96418   | -1.107066 | 1.68823   |
| A_16_P02058928 | 9 | 9933340  | 9933399  | 202479 | PTPRD                    | 1.939734 | 1.039856  | -0.888168 | 2.051116  |
| A_16_P18549304 | 9 | 9953296  | 9953355  | 221673 | PTPRD                    | 1.512838 | 0.634601  | -1.363484 | 1.3992682 |
| A_16_P18549333 | 9 | 9962017  | 9962076  | 174525 | PTPRD                    | 1.681938 | 1.03882   | -1.136912 | 1.6738633 |
| A_16_P38646180 | 9 | 9975359  | 9975418  | 11206  | PTPRD                    | 1.832586 | 1.122464  | -1.027895 | 1.8373239 |
| A_16_P18549386 | 9 | 9984638  | 9984697  | 53034  | PTPRD                    | 1.873895 | 1.257782  | -0.734761 | 1.9888785 |
| A_16_P18549409 | 9 | 9996230  | 9996289  | 218350 | PTPRD                    | 1.635333 | 0.991485  | -1.142132 | 1.7611777 |
| A_16_P18549459 | 9 | 10013842 | 10013901 | 34395  | PTPRD                    | 1.277522 | 0.50213   | -1.197276 | 1.0401759 |
| A_16_P18549489 | 9 | 10026427 | 10026486 | 236814 | PTPRD                    | 2.20975  | 1.581887  | -0.154248 | 2.591856  |
| A_16_P18549532 | 9 | 10039652 | 10039711 | 70221  | PTPRD                    | 2.037919 | 1.177877  | -0.839443 | 1.9651766 |
| A_16_P18549564 | 9 | 10050015 | 10050074 | 155261 | PTPRD                    | 1.159575 | 0.331647  | -1.558098 | 1.2666065 |
| A_16_P38646416 | 9 | 10063702 | 10063761 | 124140 | PTPRD                    | 2.664827 | 1.704256  | -0.066864 | 2.6837418 |
| A_16_P38646445 | 9 | 10072126 | 10072185 | 173730 | PTPRD                    | 1.800091 | 1.125385  | -0.941492 | 2.04373   |
| A_16_P18549689 | 9 | 10091388 | 10091447 | 225772 | PTPRD                    | 2.232621 | 1.342305  | -0.406403 | 2.2318306 |
| A_16_P18549733 | 9 | 10105548 | 10105607 | 232609 | PTPRD                    | 1.744266 | 1.055096  | -1.140382 | 1.8548223 |
| A_16_P18549763 | 9 | 10116221 | 10116280 | 130888 | PTPRD                    | 1.135024 | -0.387517 | -1.82044  | 1.1417544 |
| A_16_P02059268 | 9 | 10138017 | 10138076 | 164859 | PTPRD                    | 1.8698   | 1.152368  | -0.970452 | 1.9976571 |
| A_16_P02059277 | 9 | 10154896 | 10154955 | 163139 | PTPRD                    | 1.856037 | 1.049651  | -0.914039 | 1.6833547 |
| A_16_P02059302 | 9 | 10166368 | 10166427 | 191025 | PTPRD                    | 1.632057 | 0.640964  | -1.310619 | 1.2225864 |
| A_16_P18549896 | 9 | 10180803 | 10180862 | 40234  | PTPRD                    | 2.036173 | 1.150068  | -0.774562 | 2.1852407 |
| A_16_P38646770 | 9 | 10196418 | 10196477 | 162556 | PTPRD                    | 2.258271 | 1.40217   | -0.431223 | 2.307611  |
| A_16_P18549985 | 9 | 10208517 | 10208576 | 155978 | PTPRD                    | 1.712913 | 0.872062  | -1.345091 | 1.5348201 |
| A_16_P38646843 | 9 | 10221142 | 10221201 | 240625 | PTPRD                    | 2.181354 | 1.235241  | -0.868286 | 2.1914678 |
| A_16_P02059431 | 9 | 10239116 | 10239175 | 140783 | PTPRD                    | 1.93943  | 1.198544  | -0.782079 | 2.1114469 |
| A_16_P18550128 | 9 | 10258438 | 10258497 | 732    | PTPRD                    | 1.978538 | 1.095595  | -0.804357 | 1.9135393 |
| A_16_P02059499 | 9 | 10276927 | 10276986 | 15819  | PTPRD                    | 1.690123 | 1.019425  | -1.014416 | 1.6515366 |
| A_16_P18550221 | 9 | 10286985 | 10287044 | 153934 | PTPRD                    | 1.442683 | 0.589367  | -1.335484 | 1.3432456 |
| A_16_P18550233 | 9 | 10296637 | 10296696 | 210985 | PTPRD                    | 1.809998 | 1.178386  | -0.845956 | 1.9617281 |
| A_14_P113716   | 9 | 10310424 | 10310483 | 212259 | PTPRD                    | 1.732961 | 0.833676  | -0.874759 | 1.5934721 |
| A_16_P38647116 | 9 | 10318756 | 10318815 | 164282 | PTPRD                    | 2.046456 | 1.294696  | -0.421059 | 2.2774549 |
| A_16_P02059594 | 9 | 10330720 | 10330779 | 95153  | PTPRD                    | 1.828473 | 0.979609  | -1.169405 | 1.6478366 |
| A_16_P18550367 | 9 | 10344381 | 10344440 | 88978  | PTPRD                    | 1.990186 | 1.088024  | -0.632617 | 2.0098152 |
| A_16_P18550394 | 9 | 10353708 | 10353767 | 98533  | PTPRD                    | 1.787856 | 0.924069  | -1.02987  | 1.8386567 |
| A_16_P18550421 | 9 | 10362530 | 10362589 | 5963   | PTPRD                    | 2.101969 | 1.263781  | -0.646883 | 2.1954706 |
| A_16_P18550443 | 9 | 10371123 | 10371182 | 56718  | PTPRD                    | 1.985137 | 1.18588   | -0.723706 | 2.1633782 |
| A_16_P18550496 | 9 | 10387996 | 10388055 | 79476  | PTPRD                    | 2.126076 | 1.379342  | -0.516849 | 2.250201  |
| A_16_P38647397 | 9 | 10415554 | 10415613 | 76810  | PTPRD                    | 1.871367 | 1.11463   | -0.790753 | 1.8849468 |
| A_14_P118980   | 9 | 10430655 | 10430714 | 187848 | PTPRD                    | 2.452186 | 1.572252  | -0.198133 | 2.521894  |
| A_16_P18550649 | 9 | 10440953 | 10441012 | 20956  | PTPRD                    | 1.820748 | 0.67587   | -1.516209 | 1.1769247 |
| A_16_P18550666 | 9 | 10452528 | 10452587 | 115906 | PTPRD                    | 1.87424  | 1.516656  | -0.060024 | 1.5964012 |
| A_16_P18550697 | 9 | 10463268 | 10463327 | 81323  | PTPRD                    | 1.880699 | 1.061426  | -0.907616 | 1.5227708 |
| A_16_P18550713 | 9 | 10471642 | 10471701 | 179    | PTPRD                    | 1.686854 | 1.164752  | -0.769365 | 1.7685481 |
| A_16_P18550727 | 9 | 10485345 | 10485404 | 153421 | PTPRD                    | 1.267072 | 0.532595  | -1.422147 | 1.1708121 |
| A_16_P02059880 | 9 | 10505202 | 10505261 | 62714  | PTPRD                    | 2.13113  | 1.218352  | -1.601918 | 1.9841517 |
| A_16_P18550802 | 9 | 10517668 | 10517727 | 90113  | PTPRD                    | 1.755465 | 1.043734  | -1.048679 | 1.7671309 |
| A_16_P18550839 | 9 | 10530358 | 10530417 | 134324 | PTPRD                    | 2.050748 | 1.277151  | -0.693705 | 1.7332703 |
| A_16_P18550900 | 9 | 10548927 | 10548986 | 47129  | PTPRD                    | 1.675161 | 1.048412  | -0.942571 | 1.7523041 |
| A_16_P02059980 | 9 | 10560711 | 10560770 | 147070 | PTPRD                    | 1.672232 | 0.775684  | -1.017133 | 1.6470896 |
| A_14_P126142   | 9 | 10571443 | 10571502 | 14901  | PTPRD                    | 1.833948 | 0.959692  | -0.702821 | 1.9867798 |
| A_16_P18551018 | 9 | 10585886 | 10585945 | 126608 | PTPRD                    | 2.051756 | 1.072737  | -0.740418 | 1.8931682 |
| A_16_P18551070 | 9 | 10600765 | 10600824 | 141082 | PTPRD                    | 1.553748 | 0.548731  | -1.295954 | 1.3637804 |
| A_16_P38647945 | 9 | 10612425 | 10612484 | 56111  | chr9:010612425-010612484 | 1.999081 | 1.23495   | -0.660129 | 2.11548   |
| A_16_P18551181 | 9 | 10638009 | 10638068 | 62640  | chr9:010638009-010638068 | 1.385019 | 0.499007  | -1.514983 | 1.188262  |

|                |   |          |          |        |                          |          |           |           |           |
|----------------|---|----------|----------|--------|--------------------------|----------|-----------|-----------|-----------|
| A_14_P112889   | 9 | 10676662 | 10676721 | 78988  | chr9:010676662-010676721 | 2.208891 | 1.429002  | -0.307297 | 2.0857322 |
| A_16_P18551346 | 9 | 10711924 | 10711983 | 92961  | chr9:010711924-010711983 | 2.104599 | 1.233452  | -0.533857 | 1.9730313 |
| A_16_P18551440 | 9 | 10747704 | 10747763 | 43909  | chr9:010747704-010747763 | 1.914129 | 1.238174  | -0.722854 | 2.0724306 |
| A_16_P18551474 | 9 | 10776075 | 10776134 | 234341 | chr9:010776075-010776134 | 1.717917 | 1.144206  | -1.116074 | 1.7289612 |
| A_16_P18551535 | 9 | 10814734 | 10814793 | 235404 | chr9:010814734-010814793 | 1.857592 | 0.99592   | -0.988824 | 1.7400808 |
| A_16_P02060370 | 9 | 10842627 | 10842686 | 175812 | chr9:010842627-010842686 | 1.996214 | 1.200449  | -0.523755 | 2.1039414 |
| A_14_P101597   | 9 | 10872873 | 10872932 | 24165  | chr9:010872873-010872932 | 1.709547 | 0.968828  | -0.990372 | 1.8592541 |
| A_16_P18551689 | 9 | 10894372 | 10894431 | 208261 | chr9:010894372-010894431 | 1.567283 | 0.784289  | -1.232596 | 1.525571  |
| A_16_P18551779 | 9 | 10927040 | 10927099 | 68600  | chr9:010927040-010927099 | 1.608727 | 0.852835  | -1.193955 | 1.5018795 |
| A_16_P18551845 | 9 | 10962765 | 10962824 | 8624   | chr9:010962765-010962824 | 1.962409 | 1.059569  | -0.717317 | 1.8233802 |
| A_16_P18551910 | 9 | 10995880 | 10995939 | 4613   | chr9:010995880-010995939 | 1.201094 | 0.126225  | -1.077083 | 1.4223257 |
| A_14_P137320   | 9 | 11027385 | 11027444 | 38823  | chr9:011027385-011027444 | 0.990191 | -0.021221 | -2.264572 | 0.8456519 |
| A_16_P18552093 | 9 | 11076096 | 11076155 | 161042 | chr9:011076096-011076155 | 1.673305 | 0.802349  | -1.067706 | 1.7405692 |
| A_16_P38649008 | 9 | 11109628 | 11109687 | 146737 | chr9:011109628-011109687 | 1.409432 | 1.064107  | -0.898417 | 1.9632097 |
| A_16_P18552206 | 9 | 11130881 | 11130940 | 92481  | chr9:011130881-011130940 | 2.207314 | 1.353359  | -0.422182 | 2.2779834 |
| A_16_P18552250 | 9 | 11163090 | 11163149 | 178819 | chr9:011163090-011163149 | 1.255513 | 1.001143  | -1.035317 | 1.7150435 |
| A_16_P18552295 | 9 | 11185618 | 11185677 | 16120  | chr9:011185618-011185677 | 2.424303 | 1.279955  | -0.298447 | 2.3305256 |
| A_14_P103148   | 9 | 11209549 | 11209608 | 5112   | chr9:011209549-011209608 | 1.613    | 0.973857  | -1.207765 | 1.5532515 |
| A_16_P18552391 | 9 | 11234011 | 11234070 | 70268  | chr9:011234011-011234070 | 1.794495 | 1.050572  | -1.082643 | 1.8149493 |
| A_16_P02060875 | 9 | 11267711 | 11267770 | 125316 | chr9:011267711-011267770 | 1.557123 | 0.763778  | -1.33282  | 1.6034036 |
| A_16_P18552457 | 9 | 11308830 | 11308889 | 137204 | chr9:011308830-011308889 | 2.354892 | 1.554685  | -0.181213 | 2.5082657 |
| A_16_P38649357 | 9 | 11330763 | 11330822 | 124740 | chr9:011330763-011330822 | 1.255365 | 0.493025  | -1.545813 | 1.1988151 |
| A_16_P38649430 | 9 | 11361700 | 11361759 | 143191 | chr9:011361700-011361759 | 2.106393 | 1.398355  | -0.447164 | 2.304443  |
| A_16_P18552635 | 9 | 11395537 | 11395596 | 228797 | chr9:011395537-011395596 | 2.225815 | 1.308113  | -0.337669 | 2.147448  |
| A_16_P38649571 | 9 | 11425603 | 11425662 | 74658  | chr9:011425603-011425662 | 2.367419 | 1.531705  | -0.101545 | 2.654437  |
| A_14_P105529   | 9 | 11447340 | 11447399 | 150649 | chr9:011447340-011447399 | 1.489643 | 0.829327  | -1.096456 | 1.3399289 |
| A_16_P18552917 | 9 | 11520555 | 11520614 | 94996  | chr9:011520555-011520614 | 1.883867 | 1.194963  | -0.914774 | 1.9152476 |
| A_14_P122576   | 9 | 11563531 | 11563590 | 167806 | chr9:011563531-011563590 | 1.623484 | 0.866716  | -1.220732 | 1.6826184 |
| A_16_P18553069 | 9 | 11600241 | 11600300 | 154112 | chr9:011600241-011600300 | 1.959626 | 1.240236  | -1.170792 | 1.8887933 |
| A_16_P18553114 | 9 | 11622688 | 11622747 | 34232  | chr9:011622688-011622747 | 1.687205 | 0.776548  | -1.015028 | 1.6572351 |
| A_16_P18553166 | 9 | 11649296 | 11649355 | 179466 | chr9:011649296-011649355 | 1.483217 | 0.873771  | -1.327193 | 1.4366354 |
| A_14_P135865   | 9 | 11687635 | 11687694 | 48808  | chr9:011687635-011687694 | 1.060163 | 0.289817  | -1.479063 | 0.6509861 |
| A_16_P18553268 | 9 | 11703632 | 11703691 | 242667 | chr9:011703632-011703691 | 1.655144 | 0.885196  | -1.368205 | 1.2386225 |
| A_16_P18553298 | 9 | 11719189 | 11719248 | 101309 | chr9:011719189-011719248 | 2.147303 | 1.194046  | -0.64884  | 2.160902  |
| A_16_P18553326 | 9 | 11736422 | 11736481 | 221090 | chr9:011736422-011736481 | 2.321097 | 1.415791  | -0.295029 | 2.2901297 |
| A_16_P18553366 | 9 | 11750141 | 11750200 | 82177  | chr9:011750141-011750200 | 1.55078  | 0.681749  | -1.165328 | 1.3278177 |
| A_16_P18553366 | 9 | 11750141 | 11750200 | 233383 | chr9:011750141-011750200 | 1.570136 | 0.715921  | -1.263413 | 1.2809565 |
| A_16_P18553366 | 9 | 11750141 | 11750200 | 33664  | chr9:011750141-011750200 | 1.559805 | 0.781198  | -1.300909 | 1.3992709 |
| A_16_P18553403 | 9 | 11770402 | 11770461 | 128389 | chr9:011770402-011770461 | 1.641867 | 0.903327  | -1.363408 | 1.3435972 |
| A_16_P38650305 | 9 | 11789421 | 11789480 | 148765 | chr9:011789421-011789480 | 1.60159  | 0.824062  | -1.180957 | 1.4346942 |
| A_14_P118017   | 9 | 11808291 | 11808350 | 240246 | chr9:011808291-011808350 | 1.806125 | 0.998818  | -0.826497 | 1.6273155 |
| A_16_P18553507 | 9 | 11819736 | 11819795 | 20723  | chr9:011819736-011819795 | 1.811937 | 0.989766  | -0.919947 | 1.5346014 |
| A_16_P38650459 | 9 | 11858524 | 11858583 | 204220 | chr9:011858524-011858583 | 2.25133  | 1.44972   | -0.277956 | 2.2689505 |
| A_16_P18553684 | 9 | 11894249 | 11894308 | 226145 | chr9:011894249-011894308 | 1.469501 | 0.48362   | -1.380489 | 1.2097715 |
| A_16_P38650567 | 9 | 11917681 | 11917740 | 141920 | chr9:011917681-011917740 | 1.787578 | 0.805878  | -1.024527 | 1.5996931 |
| A_16_P18553759 | 9 | 11942522 | 11942581 | 68083  | chr9:011942522-011942581 | 1.668105 | 0.911675  | -1.087995 | 1.5428572 |
| A_16_P18553840 | 9 | 11971564 | 11971623 | 216016 | chr9:011971564-011971623 | 1.544985 | 0.839155  | -1.414245 | 1.5894905 |
| A_16_P18553886 | 9 | 11997047 | 11997106 | 68036  | chr9:011997047-011997106 | 1.589562 | 0.529352  | -1.18872  | 1.3181129 |
| A_16_P38650771 | 9 | 12021727 | 12021786 | 200231 | chr9:012021727-012021786 | 1.564813 | 0.664292  | -1.111612 | 1.3704003 |
| A_14_P136630   | 9 | 12038553 | 12038612 | 99212  | chr9:012038553-012038612 | 1.56987  | 0.752642  | -1.133151 | 1.3264683 |
| A_16_P18554008 | 9 | 12064176 | 12064235 | 124131 | chr9:012064176-012064235 | 1.774724 | 0.829327  | -1.188455 | 1.5064423 |
| A_16_P18554057 | 9 | 12104238 | 12104297 | 175442 | chr9:012104238-012104297 | 1.647225 | 0.944604  | -1.174094 | 1.4957557 |
| A_16_P18554110 | 9 | 12137751 | 12137810 | 205732 | chr9:012137751-012137810 | 2.014462 | 1.206884  | -0.760137 | 1.939565  |
| A_16_P18554156 | 9 | 12153230 | 12153289 | 172320 | chr9:012153230-012153289 | 1.559223 | 0.662459  | -1.289078 | 1.3922487 |
| A_16_P18554237 | 9 | 12186142 | 12186201 | 17726  | chr9:012186142-012186201 | 1.759724 | 1.233694  | -0.799966 | 1.6645553 |
| A_16_P38651132 | 9 | 12203622 | 12203681 | 206104 | chr9:012203622-012203681 | 1.663692 | 0.72762   | -1.185251 | 1.5783165 |
| A_16_P18554321 | 9 | 12219427 | 12219486 | 175045 | chr9:012219427-012219486 | 2.159812 | 1.437273  | -0.310479 | 2.1321516 |
| A_16_P18554365 | 9 | 12239507 | 12239566 | 116947 | chr9:012239507-012239566 | 1.838062 | 1.003213  | -1.163839 | 1.5905559 |
| A_14_P131277   | 9 | 12265118 | 12265177 | 70024  | chr9:012265118-012265177 | 2.125262 | 1.370026  | -0.329543 | 2.1545095 |
| A_16_P02062106 | 9 | 12292713 | 12292772 | 26108  | chr9:012292713-012292772 | 2.003344 | 1.264142  | -0.575593 | 1.8351648 |
| A_16_P38651372 | 9 | 12313439 | 12313498 | 63090  | chr9:012313439-012313498 | 1.962059 | 1.228922  | -0.459501 | 1.923765  |
| A_16_P18554546 | 9 | 12332481 | 12332540 | 154521 | chr9:012332481-012332540 | 2.1607   | 1.296932  | -0.531201 | 2.124183  |
| A_16_P18554585 | 9 | 12347014 | 12347073 | 178278 | chr9:012347014-012347073 | 1.796927 | 0.962155  | -1.561995 | 1.5228561 |
| A_16_P18554661 | 9 | 12377840 | 12377899 | 153995 | chr9:012377840-012377899 | 1.516339 | 0.84409   | -1.259531 | 1.3789322 |
| A_14_P101834   | 9 | 12395964 | 12396020 | 24085  | chr9:012395964-012396020 | 1.498058 | 1.063048  | -0.378617 | 1.5422508 |
| A_16_P18554761 | 9 | 12414341 | 12414400 | 121708 | chr9:012414341-012414400 | 2.316093 | 1.467189  | -0.613368 | 2.244741  |
| A_16_P38651648 | 9 | 12445191 | 12445250 | 59792  | chr9:012445191-012445250 | 2.224536 | 1.592617  | -0.434697 | 2.0034513 |
| A_16_P38651700 | 9 | 12469086 | 12469145 | 209838 | chr9:012469086-012469145 | 1.388276 | 0.674731  | -1.519002 | 1.266576  |
| A_16_P38651784 | 9 | 12505544 | 12505603 | 65375  | chr9:012505544-012505603 | 1.984136 | 1.344755  | -0.481536 | 2.0179296 |
| A_14_P101283   | 9 | 12527982 | 12528041 | 64238  | chr9:012527982-012528041 | 2.017343 | 1.399978  | -0.614266 | 1.9590424 |
| A_16_P02062439 | 9 | 12544853 | 12544912 | 187897 | chr9:012544853-012544912 | 2.554574 | 1.949157  | 0.302615  | 2.960959  |
| A_16_P38651921 | 9 | 12560676 | 12560735 | 148594 | chr9:012560676-012560735 | 2.558339 | 1.778429  | -0.013981 | 2.6760657 |
| A_16_P18555133 | 9 | 12574786 | 12574845 | 89165  | chr9:012574786-012574845 | 1.933331 | 1.230166  | -0.85862  | 1.9998567 |

|                |   |          |          |        |                          |          |          |           |           |
|----------------|---|----------|----------|--------|--------------------------|----------|----------|-----------|-----------|
| A_16_P18555182 | 9 | 12590504 | 12590563 | 9665   | chr9:012590504-012590563 | 1.976061 | 1.239423 | -0.643244 | 2.033949  |
| A_16_P38652084 | 9 | 12611362 | 12611421 | 86486  | chr9:012611362-012611421 | 2.127784 | 1.388095 | -0.589106 | 2.059484  |
| A_16_P18555342 | 9 | 12641199 | 12641258 | 35681  | chr9:012641199-012641258 | 1.736884 | 1.075693 | -0.792057 | 1.7785082 |
| A_14_P201851   | 9 | 12656200 | 12656259 | 8071   | chr9:012656200-012656259 | 1.804803 | 1.048821 | -0.754945 | 1.8266628 |
| A_16_P18555400 | 9 | 12670188 | 12670247 | 190516 | chr9:012670188-012670247 | 1.645928 | 0.779168 | -1.320043 | 1.3844508 |
| A_16_P18555408 | 9 | 12676560 | 12676619 | 215894 | chr9:012676560-012676619 | 2.246822 | 1.508724 | 0.393277  | 2.4485602 |
| A_14_P110126   | 9 | 12683407 | 12683466 | 177244 | X51420                   | 2.18551  | 1.433529 | -0.406562 | 2.2109008 |
| A_14_P101680   | 9 | 12688542 | 12688598 | 202694 | TYRP1                    | 2.387077 | 1.545316 | -0.196236 | 2.2992146 |
| A_16_P38652292 | 9 | 12692208 | 12692267 | 81076  | TYRP1                    | 1.867238 | 1.197265 | -0.869337 | 1.8247254 |
| A_16_P18555481 | 9 | 12699899 | 12699958 | 27796  | TYRP1                    | 2.267917 | 1.668556 | -0.29456  | 2.3855236 |
| A_16_P02062722 | 9 | 12710832 | 12710891 | 54528  | chr9:012710832-012710891 | 2.15111  | 1.447824 | -0.556682 | 2.1103125 |
| A_16_P18555541 | 9 | 12722919 | 12722978 | 55425  | chr9:012722919-012722978 | 2.314279 | 1.591708 | -0.238608 | 2.4089007 |
| A_16_P18555588 | 9 | 12748407 | 12748466 | 239315 | chr9:012748407-012748466 | 1.897583 | 0.99742  | -0.945031 | 1.7705483 |
| A_14_P110857   | 9 | 12762471 | 12762530 | 73553  | chr9:012762471-012762530 | 2.213629 | 1.562872 | -0.251032 | 2.3754075 |
| A_16_P02062817 | 9 | 12770110 | 12770169 | 65598  | C9orf150                 | 2.008568 | 1.186988 | -0.8339   | 1.758774  |
| A_16_P38652524 | 9 | 12776989 | 12777048 | 3877   | C9orf150                 | 1.970125 | 1.317151 | -0.613097 | 1.8759549 |
| A_16_P18555698 | 9 | 12784563 | 12784622 | 201101 | C9orf150                 | 1.737686 | 1.051739 | -0.94685  | 1.4707041 |
| A_16_P38652570 | 9 | 12790972 | 12791031 | 130127 | C9orf150                 | 1.718999 | 1.035127 | -1.06519  | 1.4807403 |
| A_16_P18555739 | 9 | 12796880 | 12796939 | 238561 | C9orf150                 | 2.175638 | 1.517384 | -0.585462 | 2.2167108 |
| A_16_P38652609 | 9 | 12806707 | 12806766 | 71495  | C9orf150                 | 2.124349 | 1.412669 | -0.455372 | 2.0117316 |
| A_16_P18555778 | 9 | 12812061 | 12812120 | 58261  | C9orf150                 | 1.914379 | 1.248373 | -0.65642  | 1.7446746 |
| A_16_P18555816 | 9 | 12825414 | 12825473 | 117926 | chr9:012825414-012825473 | 2.189134 | 1.513966 | -0.6039   | 2.1628015 |
| A_16_P18555883 | 9 | 12849897 | 12849956 | 50735  | chr9:012849897-012849956 | 2.154382 | 1.468682 | -0.365132 | 2.2278748 |
| A_14_P126048   | 9 | 12897767 | 12897826 | 107763 | chr9:012897767-012897826 | 1.489855 | 0.861741 | -0.926611 | 1.3429902 |
| A_16_P38652925 | 9 | 12931193 | 12931252 | 78019  | chr9:012931193-012931252 | 2.302861 | 1.656633 | -0.148658 | 2.3564537 |
| A_16_P18556127 | 9 | 12955311 | 12955370 | 173827 | chr9:012955311-012955370 | 2.225512 | 1.618017 | -0.359419 | 2.1595209 |
| A_16_P18556178 | 9 | 12974099 | 12974158 | 179531 | chr9:012974099-012974158 | 1.819641 | 1.143756 | -1.265979 | 1.573819  |
| A_14_P121826   | 9 | 12993652 | 12993711 | 104016 | chr9:012993652-012993711 | 2.039557 | 1.457603 | -0.650136 | 1.9836419 |
| A_16_P18556351 | 9 | 13039647 | 13039706 | 77054  | chr9:013039647-013039706 | 2.450775 | 1.623428 | -0.494232 | 2.1099105 |
| A_16_P18556416 | 9 | 13059524 | 13059583 | 104300 | chr9:013059524-013059583 | 2.58048  | 1.775094 | -0.190568 | 2.5638545 |
| A_16_P02063272 | 9 | 13079076 | 13079135 | 217913 | chr9:013079076-013079135 | 2.500924 | 1.614185 | -0.25944  | 2.4665391 |
| A_16_P18556470 | 9 | 13090240 | 13090299 | 154026 | chr9:013090240-013090299 | 2.117872 | 1.351386 | -0.809216 | 1.9588758 |
| A_14_P102069   | 9 | 13096806 | 13096865 | 65547  | MPDZ                     | 2.286456 | 1.576224 | -0.552934 | 2.264378  |
| A_14_P124786   | 9 | 13105036 | 13105093 | 148957 | MPDZ                     | 2.368299 | 1.545453 | -0.091542 | 2.1827216 |
| A_16_P38653417 | 9 | 13116511 | 13116570 | 154903 | MPDZ                     | 2.254448 | 1.64055  | -0.37843  | 2.2055728 |
| A_14_P121943   | 9 | 13126136 | 13126195 | 116169 | MPDZ                     | 2.330897 | 1.525375 | -0.455375 | 2.202279  |
| A_16_P18556625 | 9 | 13136793 | 13136852 | 32554  | MPDZ                     | 2.184668 | 1.450396 | -0.574718 | 2.0995193 |
| A_16_P18556648 | 9 | 13144751 | 13144810 | 128295 | MPDZ                     | 1.608105 | 0.71021  | -1.083665 | 1.5382451 |
| A_16_P18556672 | 9 | 13152889 | 13152948 | 184470 | MPDZ                     | 1.735417 | 0.652032 | -1.316634 | 1.2856231 |
| A_16_P18556693 | 9 | 13158317 | 13158376 | 139426 | MPDZ                     | 1.702747 | 0.785123 | -1.375356 | 1.4266281 |
| A_16_P38653589 | 9 | 13166058 | 13166117 | 25720  | MPDZ                     | 2.224521 | 1.336927 | -0.543824 | 2.1038704 |
| A_14_P126447   | 9 | 13173475 | 13173534 | 150380 | MPDZ                     | 2.525311 | 1.707563 | -0.195793 | 2.4317746 |
| A_16_P18556779 | 9 | 13182268 | 13182327 | 40126  | MPDZ                     | 1.934193 | 1.353567 | -0.676853 | 1.7526276 |
| A_16_P02063510 | 9 | 13195895 | 13195954 | 1020   | MPDZ                     | 1.860875 | 1.030255 | -1.042996 | 1.4777743 |
| A_16_P38653701 | 9 | 13201421 | 13201480 | 59407  | MPDZ                     | 1.878678 | 1.247733 | -0.784554 | 1.6298611 |
| A_14_P108991   | 9 | 13207213 | 13207272 | 190893 | MPDZ                     | 1.802443 | 0.785947 | -1.299364 | 1.5785441 |
| A_16_P02063542 | 9 | 13212393 | 13212452 | 189957 | MPDZ                     | 2.118625 | 1.150978 | -0.528944 | 2.1468534 |
| A_16_P18556882 | 9 | 13217983 | 13218042 | 62076  | MPDZ                     | 2.167292 | 1.270527 | -0.747252 | 1.9334178 |
| A_16_P18556894 | 9 | 13224895 | 13224954 | 66733  | MPDZ                     | 2.221966 | 1.288327 | -0.71567  | 1.9494318 |
| A_16_P18556909 | 9 | 13231203 | 13231262 | 190945 | MPDZ                     | 1.733836 | 0.746862 | -1.235703 | 1.3479979 |
| A_14_P120596   | 9 | 13240280 | 13240339 | 75500  | MPDZ                     | 2.08468  | 1.082933 | -0.65071  | 1.9964415 |
| A_16_P18556957 | 9 | 13248657 | 13248716 | 7739   | AB210041                 | 2.027647 | 1.11623  | -0.974858 | 1.7999418 |
| A_16_P38653898 | 9 | 13265993 | 13266052 | 149238 | AB210041                 | 2.354495 | 1.591104 | -0.523429 | 2.3247848 |
| A_16_P38653960 | 9 | 13290989 | 13291048 | 240868 | chr9:013290989-013291048 | 2.106432 | 1.171411 | -0.708427 | 1.7271541 |
| A_16_P18557117 | 9 | 13313956 | 13314015 | 143923 | chr9:013313956-013314015 | 1.893914 | 1.267804 | -0.993114 | 1.5018167 |
| A_16_P18557163 | 9 | 13342644 | 13342703 | 44261  | chr9:013342644-013342703 | 2.825268 | 1.966229 | 0.095196  | 2.9839723 |
| A_14_P122672   | 9 | 13364245 | 13364304 | 18924  | chr9:013364245-013364304 | 2.252706 | 1.41499  | -0.536191 | 2.206488  |
| A_16_P38654228 | 9 | 13405849 | 13405908 | 14572  | AK123194                 | 2.256544 | 1.308098 | -0.735073 | 1.5874068 |
| A_16_P18557408 | 9 | 13424456 | 13424515 | 145925 | chr9:013424456-013424515 | 2.268583 | 1.529654 | -0.5576   | 2.1205096 |
| A_16_P38654364 | 9 | 13444659 | 13444718 | 205257 | chr9:013444659-013444718 | 2.058608 | 1.205179 | -0.781148 | 1.8914849 |
| A_16_P18557527 | 9 | 13468491 | 13468550 | 231174 | chr9:013468491-013468550 | 1.883851 | 0.995487 | -1.131307 | 1.5080537 |
| A_14_P139386   | 9 | 13491678 | 13491737 | 144132 | chr9:013491678-013491737 | 2.233876 | 1.480679 | -0.137895 | 2.0744982 |
| A_16_P18557673 | 9 | 13516090 | 13516149 | 207947 | chr9:013516090-013516149 | 2.270708 | 1.397553 | -0.57883  | 2.1154327 |
| A_16_P02064089 | 9 | 13553668 | 13553727 | 161128 | chr9:013553668-013553727 | 2.222384 | 1.387096 | -0.634433 | 1.9963645 |
| A_14_P120872   | 9 | 13585855 | 13585914 | 21779  | chr9:013585855-013585914 | 1.484646 | 0.955266 | -0.977609 | 1.191383  |
| A_16_P02064192 | 9 | 13628428 | 13628487 | 235927 | chr9:013628428-013628487 | 1.973374 | 1.178756 | -1.001563 | 1.8279032 |
| A_16_P18558044 | 9 | 13666446 | 13666505 | 109449 | chr9:013666446-013666505 | 2.271005 | 1.439877 | -0.523931 | 2.2701614 |
| A_16_P18558116 | 9 | 13706177 | 13706236 | 23909  | chr9:013706177-013706236 | 2.077264 | 1.241771 | -0.849528 | 1.8328049 |
| A_14_P123311   | 9 | 13742900 | 13742959 | 40832  | chr9:013742900-013742959 | 2.77053  | 1.988084 | 0.202328  | 2.6628048 |
| A_16_P02064422 | 9 | 13797272 | 13797331 | 44024  | chr9:013797272-013797331 | 2.292126 | 1.498488 | -0.471457 | 2.1478603 |
| A_16_P18558430 | 9 | 13832546 | 13832605 | 89205  | chr9:013832546-013832605 | 2.077039 | 1.064303 | -0.778842 | 1.7886193 |
| A_14_P135954   | 9 | 13867280 | 13867339 | 181049 | chr9:013867280-013867339 | 1.609899 | 0.8205   | -0.269551 | 1.4602486 |
| A_16_P38655437 | 9 | 13888365 | 13888424 | 207555 | chr9:013888365-013888424 | 2.192646 | 1.395224 | -0.435328 | 2.0537586 |

|                |   |          |          |        |                          |          |          |           |           |
|----------------|---|----------|----------|--------|--------------------------|----------|----------|-----------|-----------|
| A_16_P38655508 | 9 | 13912048 | 13912107 | 124937 | chr9:013912048-013912107 | 1.746091 | 0.926258 | -1.115805 | 1.7294129 |
| A_16_P18558678 | 9 | 13932278 | 13932337 | 113913 | chr9:013932278-013932337 | 2.313524 | 1.490181 | -0.479917 | 2.1651409 |
| A_16_P18558770 | 9 | 13964040 | 13964099 | 143269 | chr9:013964040-013964099 | 2.116603 | 1.075533 | -0.668698 | 2.0447402 |
| A_14_P126505   | 9 | 14015606 | 14015665 | 102301 | chr9:014015606-014015665 | 2.192173 | 1.340746 | -0.568571 | 2.0062318 |
| A_16_P38655893 | 9 | 14053079 | 14053138 | 1631   | chr9:014053079-014053138 | 2.257117 | 1.293184 | -0.491209 | 2.0679111 |
| A_16_P02064850 | 9 | 14064086 | 14064145 | 38808  | chr9:014064086-014064145 | 2.577198 | 1.579729 | -0.056801 | 2.3599458 |
| A_14_P123749   | 9 | 14077982 | 14078041 | 4197   | NFIB                     | 2.789549 | 1.818962 | 0.087404  | 2.6260257 |
| A_16_P38656008 | 9 | 14085074 | 14085133 | 147463 | NFIB                     | 2.130127 | 1.194931 | -0.668689 | 1.9286544 |
| A_16_P38656034 | 9 | 14091864 | 14091923 | 160458 | NFIB                     | 1.926377 | 1.173259 | -1.038906 | 1.6616817 |
| A_16_P38656054 | 9 | 14097188 | 14097247 | 168358 | NFIB                     | 2.055132 | 1.243405 | -0.510518 | 1.8718945 |
| A_16_P18559199 | 9 | 14106842 | 14106901 | 95267  | NFIB                     | 1.852369 | 1.098825 | -0.755461 | 1.7092857 |
| A_16_P02064976 | 9 | 14118789 | 14118848 | 203191 | NFIB                     | 2.321934 | 1.390029 | -0.421193 | 2.153978  |
| A_16_P18559277 | 9 | 14129669 | 14129728 | 61941  | NFIB                     | 1.782166 | 1.036927 | -0.996872 | 1.5228035 |
| A_14_P120779   | 9 | 14136754 | 14136813 | 119541 | NFIB                     | 1.750812 | 1.037446 | -0.858822 | 1.6174409 |
| A_16_P18559332 | 9 | 14145838 | 14145897 | 222912 | NFIB                     | 1.618698 | 0.724451 | -1.355129 | 1.1834154 |
| A_16_P18559361 | 9 | 14156628 | 14156687 | 240383 | NFIB                     | 2.498031 | 1.553208 | -0.222073 | 2.2444236 |
| A_14_P128032   | 9 | 14169741 | 14169792 | 3211   | NFIB                     | 1.745563 | 0.937931 | -0.987089 | 1.3955842 |
| A_16_P18559428 | 9 | 14175535 | 14175594 | 150544 | NFIB                     | 2.513184 | 1.540664 | -0.207617 | 2.2232683 |
| A_16_P38656357 | 9 | 14184216 | 14184275 | 45688  | NFIB                     | 2.130301 | 1.242138 | -0.644776 | 1.8071415 |
| A_16_P18559484 | 9 | 14190359 | 14190418 | 204795 | NFIB                     | 2.022938 | 1.193625 | -0.743745 | 1.6509018 |
| A_16_P18559516 | 9 | 14200804 | 14200863 | 43819  | NFIB                     | 1.708077 | 0.874699 | -1.447743 | 1.1872492 |
| A_16_P18559550 | 9 | 14209933 | 14209992 | 94832  | NFIB                     | 1.586442 | 0.716439 | -1.214014 | 1.3642601 |
| A_16_P18559603 | 9 | 14225535 | 14225594 | 177334 | NFIB                     | 1.834722 | 1.004994 | -0.828862 | 1.5172318 |
| A_16_P02065228 | 9 | 14234957 | 14235016 | 72234  | NFIB                     | 1.99155  | 1.222963 | -0.666704 | 1.6758238 |
| A_16_P38656552 | 9 | 14243220 | 14243279 | 17836  | NFIB                     | 2.010136 | 1.102129 | -0.790651 | 1.7391737 |
| A_16_P02065259 | 9 | 14249391 | 14249450 | 87342  | NFIB                     | 2.14276  | 1.426961 | -0.518534 | 1.9658308 |
| A_16_P18559697 | 9 | 14254565 | 14254624 | 87454  | NFIB                     | 1.730318 | 0.898828 | -1.168364 | 1.4397634 |
| A_14_P118937   | 9 | 14260425 | 14260484 | 182983 | NFIB                     | 1.341845 | 0.458668 | -1.491342 | 1.006367  |
| A_16_P02065316 | 9 | 14276209 | 14276268 | 901    | NFIB                     | 0.586938 | 1.372284 | -0.583536 | 2.0017018 |
| A_16_P02065332 | 9 | 14283592 | 14283651 | 142828 | NFIB                     | 0.967801 | 1.553592 | -0.249619 | 2.241434  |
| A_16_P18559818 | 9 | 14289550 | 14289609 | 135907 | NFIB                     | 0.56638  | 1.427434 | -0.632339 | 1.9621228 |
| A_14_P131058   | 9 | 14297028 | 14297079 | 210211 | NFIB                     | 1.371862 | 0.859621 | 0.10743   | 1.3167518 |
| A_16_P38656785 | 9 | 14309445 | 14309504 | 105753 | AK131233                 | 2.200636 | 1.263895 | -0.610036 | 1.9217558 |
| A_16_P18559918 | 9 | 14316902 | 14316961 | 86716  | AK131233                 | 1.698632 | 0.840859 | -1.301043 | 1.4372447 |
| A_16_P18559951 | 9 | 14329118 | 14329177 | 208378 | AK131233                 | 2.350845 | 1.403132 | -0.535956 | 2.2238703 |
| A_16_P02065457 | 9 | 14344176 | 14344235 | 19840  | AK131233                 | 2.216059 | 1.292359 | -0.419691 | 2.0314617 |
| A_16_P02065477 | 9 | 14356339 | 14356398 | 220641 | AK131233                 | 2.263011 | 1.437438 | -0.385183 | 2.10386   |
| A_16_P38656960 | 9 | 14365090 | 14365149 | 177044 | AK131233                 | 2.970548 | 1.867682 | 0.44978   | 2.870113  |
| A_16_P18560096 | 9 | 14374575 | 14374634 | 221819 | AK131233                 | 2.522232 | 1.681563 | -0.048512 | 2.50919   |
| A_14_P127735   | 9 | 14387186 | 14387245 | 10170  | AK131233                 | 1.942086 | 1.113872 | -0.838181 | 1.7276154 |
| A_16_P02065561 | 9 | 14400594 | 14400653 | 29367  | chr9:014400594-014400653 | 1.88726  | 1.059685 | -1.007585 | 1.7135687 |
| A_16_P18560230 | 9 | 14419257 | 14419316 | 171605 | chr9:014419257-014419316 | 1.634786 | 0.847923 | -1.075604 | 1.5371437 |
| A_16_P02065641 | 9 | 14443359 | 14443418 | 183196 | chr9:014443359-014443418 | 1.888475 | 0.866446 | -1.039848 | 1.4912643 |
| A_16_P18560386 | 9 | 14473290 | 14473349 | 146062 | chr9:014473290-014473349 | 1.584281 | 0.814971 | -1.211269 | 1.3596824 |
| A_14_P112423   | 9 | 14496695 | 14496754 | 87307  | chr9:014496695-014496754 | 1.356284 | 0.578705 | -1.475428 | 0.9905394 |
| A_16_P38657411 | 9 | 14513881 | 14513940 | 53298  | chr9:014513881-014513940 | 1.646611 | 0.874702 | -1.087057 | 1.4509763 |
| A_16_P18560564 | 9 | 14532081 | 14532140 | 85581  | chr9:014532081-014532140 | 2.385538 | 1.469629 | -0.384706 | 2.330597  |
| A_16_P18560616 | 9 | 14553266 | 14553325 | 53578  | AF161360                 | 2.287537 | 1.400564 | -0.292669 | 2.083276  |
| A_16_P38657549 | 9 | 14566055 | 14566114 | 208910 | AF161360                 | 2.245835 | 1.438593 | -0.401051 | 2.2130344 |
| A_16_P02065861 | 9 | 14574656 | 14574715 | 96487  | AF161360                 | 2.212392 | 1.405765 | -0.359173 | 2.201429  |
| A_16_P18560675 | 9 | 14586720 | 14586779 | 234158 | AF161360                 | 1.833057 | 0.906616 | -1.135981 | 1.5486267 |
| A_14_P111726   | 9 | 14600351 | 14600410 | 137198 | AF161360                 | 1.581638 | 0.91961  | -1.315908 | 1.1937218 |
| A_16_P02065902 | 9 | 14607072 | 14607131 | 88818  | ZDHHC21                  | 1.861139 | 1.098298 | -1.045247 | 1.5733674 |
| A_16_P38657649 | 9 | 14612561 | 14612620 | 88395  | ZDHHC21                  | 2.795877 | 1.680018 | -0.050361 | 2.549209  |
| A_16_P02065929 | 9 | 14619296 | 14619355 | 179286 | ZDHHC21                  | 2.146244 | 1.328682 | -0.718564 | 2.1095514 |
| A_14_P125182   | 9 | 14629912 | 14629971 | 121194 | ZDHHC21                  | 2.181785 | 1.356022 | -0.568343 | 2.0125158 |
| A_16_P18560784 | 9 | 14640701 | 14640760 | 134970 | ZDHHC21                  | 2.270038 | 1.923521 | -0.361221 | 2.171654  |
| A_16_P02065966 | 9 | 14652271 | 14652330 | 1089   | ZDHHC21                  | 2.456292 | 1.458579 | -0.508155 | 2.3088515 |
| A_16_P18560836 | 9 | 14662226 | 14662285 | 181625 | ZDHHC21                  | 2.021704 | 1.1964   | -0.872298 | 1.7468166 |
| A_14_P132360   | 9 | 14670121 | 14670180 | 124664 | ZDHHC21                  | 1.660836 | 0.864936 | -1.195014 | 1.3698804 |
| A_16_P18560874 | 9 | 14679466 | 14679525 | 40379  | ZDHHC21                  | 1.699609 | 0.944289 | -1.241435 | 1.5417992 |
| A_16_P02066010 | 9 | 14685436 | 14685495 | 208763 | chr9:014685436-014685495 | 2.728077 | 1.702099 | -0.13903  | 2.4529188 |
| A_16_P02066022 | 9 | 14691922 | 14691981 | 74710  | chr9:014691922-014691981 | 2.79992  | 1.819869 | -0.250714 | 2.5886574 |
| A_16_P18560922 | 9 | 14696065 | 14696124 | 207234 | chr9:014696065-014696124 | 1.982262 | 1.199051 | -0.787503 | 1.7435632 |
| A_16_P18560928 | 9 | 14703562 | 14703621 | 197491 | chr9:014703562-014703621 | 1.979374 | 1.119551 | -0.873357 | 1.8579609 |
| A_14_P128784   | 9 | 14710333 | 14710392 | 11258  | CER1                     | 2.106248 | 1.116947 | -0.62466  | 1.9942427 |
| A_16_P18560963 | 9 | 14714078 | 14714137 | 209151 | chr9:014714078-014714137 | 1.449782 | 0.605866 | -1.411348 | 1.1916668 |
| A_16_P18560987 | 9 | 14721515 | 14721574 | 75653  | chr9:014721515-014721574 | 2.081126 | 1.118096 | -0.999105 | 1.8255072 |
| A_16_P38657919 | 9 | 14727255 | 14727314 | 78833  | FREM1                    | 2.161093 | 1.430591 | -0.65667  | 1.8981017 |
| A_16_P18561026 | 9 | 14733756 | 14733815 | 119920 | FREM1                    | 2.17751  | 1.397005 | -0.526374 | 2.1965008 |
| A_14_P104174   | 9 | 14740215 | 14740274 | 72934  | FREM1                    | 2.344778 | 1.444367 | -0.417927 | 2.2570174 |
| A_16_P02066127 | 9 | 14752351 | 14752410 | 181838 | FREM1                    | 2.245592 | 1.362834 | -0.722006 | 1.916915  |
| A_14_P202219   | 9 | 14765761 | 14765819 | 109953 | FREM1                    | 2.502633 | 1.698096 | -0.323002 | 2.5651    |



|                |   |          |          |        |                          |           |          |           |            |
|----------------|---|----------|----------|--------|--------------------------|-----------|----------|-----------|------------|
| A_16_P02066190 | 9 | 14782811 | 14782870 | 173233 | FREM1                    | 2.374993  | 1.440772 | -0.398568 | 2.487416   |
| A_16_P02066212 | 9 | 14795108 | 14795167 | 178117 | FREM1                    | 2.252441  | 1.49436  | -0.431442 | 2.2340279  |
| A_16_P38658185 | 9 | 14801142 | 14801201 | 42477  | FREM1                    | 2.138226  | 1.2134   | -0.679613 | 2.1609707  |
| A_16_P02066243 | 9 | 14809210 | 14809269 | 239018 | FREM1                    | 2.172319  | 1.383176 | -0.509425 | 2.1326609  |
| A_16_P38658231 | 9 | 14814722 | 14814781 | 175616 | FREM1                    | 1.294932  | 0.500459 | -1.519188 | 1.2497743  |
| A_16_P38658263 | 9 | 14832243 | 14832302 | 203105 | FREM1                    | 2.40793   | 1.502143 | -0.18699  | 2.4054084  |
| A_16_P02066286 | 9 | 14838725 | 14838784 | 90507  | FREM1                    | 2.398419  | 1.564453 | -0.252914 | 2.4659555  |
| A_16_P02066309 | 9 | 14849130 | 14849189 | 204192 | FREM1                    | 2.567566  | 1.57002  | -0.289473 | 2.311897   |
| A_16_P02066317 | 9 | 14854769 | 14854828 | 235371 | FREM1                    | 2.172073  | 1.417155 | -0.558923 | 2.0902047  |
| A_16_P18561419 | 9 | 14868777 | 14868836 | 208430 | FREM1                    | 2.011691  | 1.153625 | -0.708072 | 1.834193   |
| A_14_P118605   | 9 | 14877042 | 14877101 | 239232 | FREM1                    | 1.940806  | 1.184472 | -0.80499  | 1.8142548  |
| A_16_P18561477 | 9 | 14892991 | 14893050 | 116981 | FREM1                    | 1.422144  | 0.444195 | -1.691456 | 1.0103538  |
| A_16_P02066380 | 9 | 14900884 | 14900943 | 196982 | BX537574                 | 1.843033  | 0.975105 | -1.087714 | 1.6632646  |
| A_16_P18561531 | 9 | 14915216 | 14915275 | 52609  | chr9:014915216-014915275 | 1.774183  | 0.870596 | -1.079019 | 1.4943736  |
| A_16_P18561566 | 9 | 14926541 | 14926600 | 194778 | chr9:014926541-014926600 | 1.851198  | 1.021893 | -0.440908 | 1.7716167  |
| A_16_P38658531 | 9 | 14939025 | 14939084 | 242861 | chr9:014939025-014939084 | 2.186352  | 1.352932 | -0.575477 | 2.0349135  |
| A_16_P18561607 | 9 | 14965815 | 14965873 | 184789 | chr9:014965815-014965873 | 1.455031  | 0.583804 | -0.796497 | 1.5802726  |
| A_16_P18561639 | 9 | 14976339 | 14976398 | 135596 | chr9:014976339-014976398 | 2.080147  | 1.197058 | -1.179956 | 1.7535464  |
| A_16_P18561662 | 9 | 14987094 | 14987153 | 118139 | AK127963                 | 2.212606  | 1.510457 | -0.500243 | 2.2649896  |
| A_16_P02066473 | 9 | 14994045 | 14994104 | 177048 | AK127963                 | 2.042972  | 1.430102 | -0.728547 | 2.0171862  |
| A_16_P18561713 | 9 | 15003711 | 15003770 | 209137 | AK127963                 | 1.780758  | 1.148113 | -1.120806 | 1.665241   |
| A_16_P18561739 | 9 | 15012314 | 15012373 | 200527 | AK127963                 | 1.228109  | 0.404357 | -1.14278  | 1.1501417  |
| A_16_P02066516 | 9 | 15030963 | 15031022 | 196335 | AK127963                 | 1.741784  | 1.005785 | -1.139782 | 1.4961362  |
| A_16_P02066528 | 9 | 15045243 | 15045302 | 111882 | AK127963                 | 2.316606  | 1.538615 | -0.303873 | 2.2989268  |
| A_16_P18561823 | 9 | 15059504 | 15059563 | 136052 | AK127963                 | 1.89063   | 1.168945 | -0.891957 | 1.8157051  |
| A_16_P38658811 | 9 | 15076757 | 15076816 | 39843  | AK127963                 | 1.83893   | 1.10589  | -0.949907 | 1.661462   |
| A_14_P126687   | 9 | 15094399 | 15094458 | 183126 | AK127963                 | 1.73538   | 0.997806 | -1.156471 | 1.4779736  |
| A_16_P18561910 | 9 | 15103102 | 15103161 | 111097 | AK127963                 | 2.326644  | 1.55004  | -0.34408  | 2.210016   |
| A_16_P18561936 | 9 | 15112934 | 15112993 | 61759  | AK127963                 | 2.320746  | 1.581808 | -0.270138 | 2.187729   |
| A_16_P18561952 | 9 | 15123135 | 15123194 | 141617 | AK127963                 | 2.106757  | 1.24924  | -0.670423 | 1.9399724  |
| A_16_P18562022 | 9 | 15148464 | 15148523 | 142599 | chr9:015148464-015148523 | -6.508333 | 1.541699 | -0.222199 | 2.2641056  |
| A_16_P18562034 | 9 | 15154403 | 15154462 | 74348  | AK093996                 | 1.97386   | 1.204452 | -0.800521 | 1.8848447  |
| A_16_P18562058 | 9 | 15161603 | 15161662 | 7104   | C9orf52                  | 1.679307  | 0.848995 | -1.215657 | 1.4674629  |
| A_16_P02066705 | 9 | 15167665 | 15167724 | 135805 | C9orf52                  | 1.647641  | 0.946376 | -1.075705 | 1.4467118  |
| A_14_P130440   | 9 | 15175692 | 15175751 | 173940 | C9orf52                  | 1.265839  | 0.145561 | -2.21976  | 0.37278178 |
| A_16_P18562125 | 9 | 15182527 | 15182586 | 200649 | C9orf52                  | 2.069564  | 1.370702 | -0.553074 | 1.9654729  |
| A_16_P18562136 | 9 | 15189812 | 15189871 | 29187  | C9orf52                  | 1.628628  | 0.726736 | -1.633076 | 1.0622435  |
| A_16_P18562162 | 9 | 15197595 | 15197654 | 147117 | C9orf52                  | 2.249974  | 1.494615 | -0.160599 | 2.4978306  |
| A_16_P18562182 | 9 | 15204090 | 15204149 | 69162  | C9orf52                  | 1.710332  | 0.926639 | -0.857618 | 1.6713309  |
| A_14_P111870   | 9 | 15215981 | 15216038 | 157919 | C9orf52                  | 2.516547  | 1.688697 | 0.083505  | 2.6065128  |
| A_16_P18562232 | 9 | 15221799 | 15221858 | 184334 | C9orf52                  | 2.357372  | 1.444145 | -1.048596 | 2.3120856  |
| A_16_P02066800 | 9 | 15234497 | 15234556 | 75604  | C9orf52                  | 2.536572  | 1.620663 | 0.045406  | 2.6759796  |
| A_16_P18562293 | 9 | 15250627 | 15250686 | 7807   | C9orf52                  | 2.141238  | 1.3213   | -0.749157 | 2.2506006  |
| A_14_P135249   | 9 | 15257912 | 15257965 | 187815 | C9orf52                  | 1.693449  | 0.830938 | -1.108521 | 1.3859582  |
| A_16_P38659304 | 9 | 15263240 | 15263299 | 30614  | C9orf52                  | 1.846664  | 1.050211 | -0.887322 | 1.82258    |
| A_16_P38659322 | 9 | 15268468 | 15268527 | 93730  | C9orf52                  | 1.623465  | 0.934657 | -0.869848 | 1.7409128  |
| A_16_P02066869 | 9 | 15279703 | 15279762 | 56176  | C9orf52                  | 2.058283  | 1.316449 | -0.66787  | 2.1524224  |
| A_16_P02066877 | 9 | 15286197 | 15286256 | 193363 | C9orf52                  | 2.39623   | 1.693285 | 0.083004  | 2.5576057  |
| A_14_P111040   | 9 | 15295842 | 15295901 | 102181 | C9orf52                  | 2.457193  | 1.62988  | -0.131934 | 2.4439502  |
| A_16_P02066900 | 9 | 15307439 | 15307498 | 185982 | chr9:015307439-015307498 | 2.095089  | 1.319209 | -0.552038 | 2.2167282  |
| A_16_P02066911 | 9 | 15325490 | 15325549 | 213469 | chr9:015325490-015325549 | 2.669371  | 1.832341 | -0.241996 | 2.707994   |
| A_16_P02066926 | 9 | 15341273 | 15341332 | 91642  | chr9:015341273-015341332 | 2.084213  | 1.325894 | -0.644088 | 2.0767257  |
| A_16_P02066943 | 9 | 15368135 | 15368194 | 193326 | chr9:015368135-015368194 | 2.119346  | 1.31339  | -0.308301 | 2.0712037  |
| A_16_P02066970 | 9 | 15393983 | 15394042 | 4812   | chr9:015393983-015394042 | 1.914817  | 1.039467 | -0.811243 | 1.8134086  |
| A_16_P02066978 | 9 | 15407029 | 15407088 | 113137 | chr9:015407029-015407088 | 2.680725  | 1.761906 | 0.168223  | 2.8298328  |
| A_16_P02066983 | 9 | 15413878 | 15413937 | 162243 | SNAPC3                   | 2.666064  | 1.799894 | 0.067182  | 2.6853368  |
| A_14_P202180   | 9 | 15423811 | 15423870 | 148651 | SNAPC3                   | 2.576495  | 1.750154 | 0.091055  | 2.8275616  |
| A_14_P110174   | 9 | 15434582 | 15434638 | 169038 | SNAPC3                   | 1.871063  | 1.061402 | -0.77939  | 1.9391377  |
| A_16_P18562637 | 9 | 15443065 | 15443124 | 230115 | SNAPC3                   | 2.219815  | 1.368073 | -0.465976 | 2.358936   |
| A_16_P02067026 | 9 | 15451943 | 15452002 | 190946 | BC036031                 | 1.838148  | 1.108972 | -1.100774 | 1.8750138  |
| A_16_P38659702 | 9 | 15462577 | 15462636 | 76765  | PSIP1                    | 2.325798  | 1.481677 | -0.509941 | 2.5323918  |
| A_14_P128808   | 9 | 15468451 | 15468510 | 13372  | PSIP1                    | 1.713813  | 0.915825 | -0.900277 | 1.6357516  |
| A_16_P18562741 | 9 | 15476778 | 15476837 | 71455  | PSIP1                    | 1.876751  | 1.084554 | -0.854008 | 1.8947825  |
| A_16_P18562758 | 9 | 15484769 | 15484828 | 118793 | PSIP1                    | 1.707123  | 0.889752 | -1.23247  | 1.6020236  |
| A_16_P02067099 | 9 | 15490809 | 15490868 | 101615 | PSIP1                    | 1.937419  | 1.230106 | -0.743689 | 1.9962056  |
| A_14_P105718   | 9 | 15496545 | 15496601 | 218787 | PSIP1                    | 1.622048  | 0.862014 | -1.333427 | 1.4939859  |
| A_16_P38659841 | 9 | 15506802 | 15506861 | 135605 | chr9:015506802-015506861 | 2.289011  | 1.505088 | -0.401199 | 2.4186625  |
| A_16_P38659852 | 9 | 15512553 | 15512612 | 48627  | chr9:015512553-015512612 | 2.087912  | 0.170686 | -0.54971  | 2.214312   |
| A_16_P02067132 | 9 | 15518326 | 15518385 | 37664  | chr9:015518326-015518385 | 2.722191  | 1.869739 | -0.170188 | 2.9216712  |
| A_16_P18562859 | 9 | 15525784 | 15525843 | 232625 | chr9:015525784-015525843 | 1.814907  | 0.982565 | -0.997399 | 2.0204334  |
| A_16_P18562874 | 9 | 15533012 | 15533071 | 123362 | chr9:015533012-015533071 | 1.883466  | 1.116273 | -0.764515 | 1.964576   |
| A_16_P18562879 | 9 | 15539731 | 15539790 | 67131  | chr9:015539731-015539790 | 1.802559  | 1.046862 | -0.918783 | 1.9230894  |
| A_16_P18562903 | 9 | 15554099 | 15554158 | 181818 | C9orf93                  | 2.253815  | 1.385729 | -0.487131 | 2.410542   |

|                |   |          |          |        |                          |          |          |           |           |
|----------------|---|----------|----------|--------|--------------------------|----------|----------|-----------|-----------|
| A_16_P38659935 | 9 | 15561664 | 15561723 | 21405  | C9orf93                  | 1.989181 | 1.07801  | -0.774226 | 1.9214681 |
| A_16_P38659956 | 9 | 15568785 | 15568844 | 31947  | C9orf93                  | 1.618061 | 0.891203 | -1.120422 | 1.6104838 |
| A_14_P118169   | 9 | 15581401 | 15581460 | 134734 | C9orf93                  | 1.837453 | 1.101829 | -1.170617 | 1.8596181 |
| A_16_P18562964 | 9 | 15591864 | 15591923 | 10969  | C9orf93                  | 1.889539 | 0.98374  | -0.828942 | 1.9963126 |
| A_16_P38660004 | 9 | 15597236 | 15597295 | 173757 | C9orf93                  | 2.08053  | 1.33925  | -0.687772 | 2.1273522 |
| A_16_P38660011 | 9 | 15605655 | 15605714 | 233000 | C9orf93                  | 2.004047 | 1.173321 | -0.734522 | 2.1409168 |
| A_16_P18562994 | 9 | 15613080 | 15613139 | 62709  | C9orf93                  | 1.737361 | 0.850564 | -1.135357 | 1.7687414 |
| A_16_P18563008 | 9 | 15628307 | 15628366 | 98710  | C9orf93                  | 1.502176 | 0.711113 | -1.058756 | 1.8156785 |
| A_16_P18563028 | 9 | 15633471 | 15633530 | 224379 | C9orf93                  | 2.172133 | 1.44829  | -0.218603 | 2.5478384 |
| A_16_P02067242 | 9 | 15647106 | 15647165 | 212865 | C9orf93                  | 1.915424 | 1.136867 | -0.831885 | 2.015081  |
| A_16_P18563055 | 9 | 15653232 | 15653291 | 179332 | C9orf93                  | 2.245457 | 1.398915 | -0.627068 | 2.3449736 |
| A_16_P38660099 | 9 | 15661170 | 15661229 | 163259 | C9orf93                  | 1.870499 | 1.143987 | -0.860898 | 1.9175602 |
| A_16_P38660105 | 9 | 15668828 | 15668887 | 153281 | C9orf93                  | 2.139517 | 1.254237 | -0.391005 | 1.9833934 |
| A_16_P18563120 | 9 | 15686065 | 15686124 | 60737  | C9orf93                  | 1.72909  | 0.838602 | -1.179036 | 1.848056  |
| A_16_P18563139 | 9 | 15698223 | 15698282 | 70441  | C9orf93                  | 2.425597 | 1.601282 | 0.028806  | 2.8784168 |
| A_16_P38660183 | 9 | 15706361 | 15706420 | 194998 | C9orf93                  | 1.6479   | 1.086831 | -0.828211 | 1.9646095 |
| A_16_P18563171 | 9 | 15713672 | 15713731 | 156872 | C9orf93                  | 1.338406 | 0.759821 | -1.486083 | 1.5572895 |
| A_16_P18563194 | 9 | 15720709 | 15720768 | 185206 | C9orf93                  | 1.450626 | 0.916419 | -1.184809 | 1.8176993 |
| A_16_P02067344 | 9 | 15729142 | 15729201 | 141235 | C9orf93                  | 2.113967 | 1.527324 | -0.319959 | 2.51623   |
| A_14_P115692   | 9 | 15735493 | 15735552 | 98408  | C9orf93                  | 2.08121  | 1.431779 | -0.443245 | 2.5222185 |
| A_16_P02067358 | 9 | 15743135 | 15743194 | 88532  | C9orf93                  | 2.099407 | 1.480118 | -0.366459 | 2.58873   |
| A_16_P18563247 | 9 | 15750636 | 15750695 | 200576 | C9orf93                  | 1.73405  | 1.049572 | -0.801754 | 2.0811477 |
| A_16_P18563266 | 9 | 15763591 | 15763650 | 198698 | C9orf93                  | 1.456096 | 0.845999 | -1.897334 | 1.1997111 |
| A_14_P137240   | 9 | 15769098 | 15769157 | 142131 | C9orf93                  | 1.658926 | 1.010655 | -0.526413 | 2.0289574 |
| A_16_P02067401 | 9 | 15774494 | 15774553 | 54870  | C9orf93                  | 1.815822 | 1.004117 | -0.437778 | 1.9978904 |
| A_16_P18563311 | 9 | 15784921 | 15784980 | 236154 | C9orf93                  | 1.698734 | 1.029987 | -0.691286 | 1.9904423 |
| A_16_P02067414 | 9 | 15802255 | 15802314 | 96253  | C9orf93                  | 1.775287 | 1.094162 | -0.707858 | 1.9475037 |
| A_16_P38660375 | 9 | 15813954 | 15814013 | 167505 | C9orf93                  | 1.827957 | 1.091637 | -0.748493 | 2.0320601 |
| A_16_P18563380 | 9 | 15827900 | 15827959 | 180158 | C9orf93                  | 1.730122 | 1.250379 | -0.851284 | 2.2104928 |
| A_14_P112723   | 9 | 15835641 | 15835700 | 194847 | C9orf93                  | 1.635    | 1.062407 | -0.255482 | 2.1922321 |
| A_16_P02067475 | 9 | 15838886 | 15838945 | 199994 | C9orf93                  | 1.340788 | 0.830561 | -1.292268 | 1.6591253 |
| A_16_P38660470 | 9 | 15855052 | 15855111 | 213356 | C9orf93                  | 1.472717 | 0.798704 | -1.255057 | 1.6956861 |
| A_14_P115272   | 9 | 15865748 | 15865807 | 113301 | C9orf93                  | 0.875098 | 0.247621 | -1.435893 | 1.238056  |
| A_16_P18563481 | 9 | 15871011 | 15871070 | 7521   | C9orf93                  | 1.748851 | 1.321747 | -0.647077 | 2.2339153 |
| A_16_P38660552 | 9 | 15880891 | 15880950 | 141592 | C9orf93                  | 1.647572 | 1.237396 | -0.697776 | 1.9751656 |
| A_16_P18563523 | 9 | 15886644 | 15886703 | 122642 | C9orf93                  | 1.744314 | 1.250671 | -0.760516 | 2.2561827 |
| A_16_P38660578 | 9 | 15899745 | 15899804 | 206481 | C9orf93                  | 1.367537 | 1.071276 | -0.927825 | 1.9066085 |
| A_14_P121116   | 9 | 15910301 | 15910360 | 49430  | C9orf93                  | 1.322442 | 1.086969 | -1.099935 | 1.8242205 |
| A_16_P18563566 | 9 | 15917413 | 15917472 | 188423 | C9orf93                  | 1.260661 | 0.92953  | -1.032953 | 1.739473  |
| A_16_P18563594 | 9 | 15929568 | 15929627 | 213714 | C9orf93                  | 1.531009 | 1.238763 | -0.676066 | 2.1871543 |
| A_16_P02067596 | 9 | 15946088 | 15946147 | 69483  | C9orf93                  | 1.474187 | 1.289799 | -0.890505 | 2.0384285 |
| A_16_P18563636 | 9 | 15951601 | 15951660 | 52960  | C9orf93                  | 1.344096 | 0.989389 | -1.102911 | 1.8215597 |
| A_16_P02067625 | 9 | 15961584 | 15961643 | 109095 | C9orf93                  | 1.08846  | 0.713055 | -1.385932 | 1.4392729 |
| A_16_P18563687 | 9 | 15967788 | 15967847 | 113535 | AL832443                 | 1.429056 | 1.223091 | -0.91475  | 1.9819404 |
| A_16_P02067651 | 9 | 15975310 | 15975369 | 143458 | AL832443                 | 1.754801 | 1.566439 | 0.24408   | 2.6977007 |
| A_16_P18563733 | 9 | 15993053 | 15993112 | 319    | AL832443                 | 1.824808 | 1.472884 | -0.284867 | 2.4514742 |
| A_14_P107760   | 9 | 16005445 | 16005504 | 200121 | AL832443                 | 1.651907 | 1.274203 | -0.605504 | 2.1949596 |
| A_16_P18563803 | 9 | 16020267 | 16020326 | 96774  | AL832443                 | 1.655373 | 1.249214 | -0.728164 | 2.1848102 |
| A_16_P38660888 | 9 | 16031848 | 16031907 | 12606  | AL832443                 | 1.569641 | 1.092691 | -0.755994 | 1.8220783 |
| A_16_P18563874 | 9 | 16047005 | 16047064 | 117698 | AL832443                 | 1.435514 | 0.966707 | -0.761252 | 1.7206254 |
| A_16_P02067809 | 9 | 16083483 | 16083542 | 129359 | chr9:016083483-016083542 | 1.981808 | 1.68044  | -0.010154 | 2.6563256 |
| A_16_P02067856 | 9 | 16114031 | 16114090 | 146177 | chr9:016114031-016114090 | 2.228785 | 1.827575 | 0.166491  | 2.9139597 |
| A_16_P02067927 | 9 | 16150324 | 16150383 | 47124  | chr9:016150324-016150383 | 1.834144 | 1.480013 | -0.262855 | 2.3472126 |
| A_16_P18564218 | 9 | 16172001 | 16172060 | 73036  | chr9:016172001-016172060 | 1.691451 | 1.170082 | -0.634543 | 2.230365  |
| A_16_P02068044 | 9 | 16220786 | 16220845 | 156588 | chr9:016220786-016220845 | 1.753596 | 1.423608 | -0.187599 | 2.2045782 |
| A_16_P02068092 | 9 | 16246409 | 16246468 | 25838  | chr9:016246409-016246468 | 1.525069 | 1.283807 | -0.597591 | 1.8866466 |
| A_16_P02068137 | 9 | 16271246 | 16271305 | 29702  | chr9:016271246-016271305 | 2.056139 | 1.641393 | -0.141098 | 2.650367  |
| A_14_P124281   | 9 | 16297883 | 16297942 | 149452 | chr9:016297883-016297942 | 1.043822 | 0.963511 | -0.876148 | 1.4848828 |
| A_16_P38661746 | 9 | 16339525 | 16339584 | 58230  | chr9:016339525-016339584 | 1.65588  | 1.349432 | -0.597104 | 2.3467147 |
| A_16_P02068301 | 9 | 16376365 | 16376424 | 212590 | chr9:016376365-016376424 | 1.692821 | 1.489974 | -0.252502 | 2.3976507 |
| A_16_P02068327 | 9 | 16391595 | 16391654 | 160653 | chr9:016391595-016391654 | 1.417787 | 1.242462 | -0.663691 | 2.0490384 |
| A_14_P137212   | 9 | 16408754 | 16408813 | 37378  | BNC2                     | 1.201804 | 0.976911 | -0.99662  | 1.6342242 |
| A_16_P02068382 | 9 | 16419237 | 16419296 | 91445  | BNC2                     | 1.38601  | 0.940265 | -0.891755 | 1.8629394 |
| A_14_P123856   | 9 | 16424825 | 16424884 | 152997 | BNC2                     | 2.255979 | 1.970428 | 0.315589  | 3.1561754 |
| A_16_P02068423 | 9 | 16438191 | 16438250 | 149714 | BNC2                     | 1.384423 | 0.969502 | -0.991307 | 1.778131  |
| A_16_P38662060 | 9 | 16444625 | 16444684 | 131460 | BNC2                     | 1.636519 | 1.302143 | -0.487206 | 2.2702045 |
| A_16_P18565037 | 9 | 16455531 | 16455590 | 233561 | BNC2                     | 0.660005 | 1.500347 | -0.632315 | 2.4813862 |
| A_16_P38662106 | 9 | 16462584 | 16462643 | 70559  | BNC2                     | 1.851048 | 1.207178 | -0.017776 | 2.6925228 |
| A_16_P02068477 | 9 | 16469398 | 16469457 | 147274 | BNC2                     | 1.490597 | 1.102873 | -0.593654 | 2.172646  |
| A_16_P18565109 | 9 | 16482217 | 16482276 | 89098  | BNC2                     | 1.842983 | 1.526096 | -0.130999 | 2.5870793 |
| A_16_P18565124 | 9 | 16488698 | 16488757 | 218495 | BNC2                     | 1.341065 | 1.086849 | -0.959632 | 2.0441375 |
| A_16_P02068538 | 9 | 16500885 | 16500944 | 70933  | BNC2                     | 1.935612 | 1.497481 | -0.070928 | 2.6769896 |
| A_14_P116156   | 9 | 16516550 | 16516609 | 142441 | BNC2                     | 1.638577 | 1.306603 | -0.508477 | 2.3429718 |

|                |   |          |          |        |                          |          |          |           |           |
|----------------|---|----------|----------|--------|--------------------------|----------|----------|-----------|-----------|
| A_14_P202290   | 9 | 16517601 | 16517656 | 211840 | BNC2                     | 0.939013 | 0.582793 | -1.017359 | 1.4214978 |
| A_16_P18565264 | 9 | 16530406 | 16530465 | 238313 | BNC2                     | 1.507837 | 1.18444  | -0.903947 | 2.0192504 |
| A_16_P18565294 | 9 | 16538881 | 16538940 | 95191  | BNC2                     | 0.82555  | 0.5249   | -1.604416 | 1.2484119 |
| A_16_P18565314 | 9 | 16544068 | 16544127 | 194176 | BNC2                     | 1.693594 | 1.716898 | -0.514425 | 2.205396  |
| A_16_P18565339 | 9 | 16555150 | 16555209 | 8539   | BNC2                     | 1.92498  | 1.645371 | -0.230602 | 2.5948324 |
| A_16_P38662441 | 9 | 16564453 | 16564512 | 141453 | BNC2                     | 1.840279 | 1.563059 | -0.377661 | 2.476665  |
| A_16_P18565402 | 9 | 16573851 | 16573910 | 60898  | BNC2                     | 1.243189 | 0.90564  | -1.047782 | 1.7845211 |
| A_16_P18565423 | 9 | 16581045 | 16581104 | 224703 | BNC2                     | 1.137761 | 0.843859 | -1.178769 | 1.5750062 |
| A_16_P18565472 | 9 | 16595000 | 16595059 | 3552   | BNC2                     | 1.714456 | 1.364279 | -0.618718 | 2.0728745 |
| A_16_P18565496 | 9 | 16602378 | 16602437 | 166410 | BNC2                     | 1.254969 | 0.960705 | -1.065724 | 1.624338  |
| A_16_P18565541 | 9 | 16616448 | 16616507 | 7080   | BNC2                     | 2.119098 | 1.828988 | 0.149713  | 2.6057336 |
| A_16_P18565588 | 9 | 16630519 | 16630578 | 37034  | BNC2                     | 1.79558  | 1.268832 | -0.440686 | 2.2759318 |
| A_16_P18565626 | 9 | 16641350 | 16641409 | 68396  | BNC2                     | 1.573125 | 1.106397 | -0.727314 | 1.9036355 |
| A_14_P121758   | 9 | 16650469 | 16650528 | 167694 | BNC2                     | 0.909321 | 0.640846 | -1.119634 | 1.1003134 |
| A_16_P18565688 | 9 | 16659895 | 16659954 | 14019  | BNC2                     | 0.886771 | 0.55684  | -0.705742 | 1.9497616 |
| A_16_P38662790 | 9 | 16666504 | 16666563 | 112538 | BNC2                     | 1.242325 | 0.935317 | -0.917188 | 1.5163969 |
| A_16_P18565749 | 9 | 16676616 | 16676675 | 207600 | BNC2                     | 1.138734 | 0.952596 | -1.146585 | 1.4373474 |
| A_16_P38662854 | 9 | 16684298 | 16684357 | 242681 | BNC2                     | 1.61272  | 1.354091 | -0.47039  | 2.0609636 |
| A_16_P18565795 | 9 | 16689996 | 16690055 | 222150 | BNC2                     | 1.423182 | 1.171421 | -0.648525 | 1.888565  |
| A_16_P02068951 | 9 | 16695200 | 16695259 | 221912 | BNC2                     | 2.102243 | 1.736075 | 0.158044  | 2.6095867 |
| A_16_P18565833 | 9 | 16700275 | 16700334 | 195595 | BNC2                     | 1.329371 | 0.997558 | -1.019875 | 1.8127248 |
| A_16_P18565879 | 9 | 16712823 | 16712882 | 72845  | BNC2                     | 1.383475 | 1.177793 | -0.783442 | 1.9985857 |
| A_16_P38662989 | 9 | 16722960 | 16723019 | 77496  | BNC2                     | 1.662721 | 1.445469 | -0.546133 | 1.9942524 |
| A_16_P18565942 | 9 | 16732727 | 16732786 | 7835   | BNC2                     | 1.582231 | 1.195309 | -0.492379 | 1.8973743 |
| A_16_P02069052 | 9 | 16742992 | 16743051 | 35412  | BNC2                     | 1.918071 | 1.620541 | -0.203012 | 2.513738  |
| A_16_P38663085 | 9 | 16753706 | 16753765 | 209666 | BNC2                     | 1.656285 | 1.3056   | -0.455054 | 2.1546645 |
| A_16_P18566037 | 9 | 16763272 | 16763331 | 219578 | BNC2                     | 1.73311  | 1.370164 | -0.361574 | 2.0966835 |
| A_16_P38663135 | 9 | 16769373 | 16769432 | 75614  | BNC2                     | 1.199351 | 0.862512 | -1.138776 | 1.3011106 |
| A_16_P18566077 | 9 | 16776118 | 16776177 | 198087 | BNC2                     | 1.628785 | 1.359491 | -0.431819 | 2.0019603 |
| A_16_P38663200 | 9 | 16791008 | 16791067 | 146465 | BNC2                     | 1.707848 | 1.375941 | -0.442726 | 2.24263   |
| A_16_P02069161 | 9 | 16799362 | 16799421 | 160223 | BNC2                     | 1.542084 | 1.287388 | -0.75502  | 1.9302608 |
| A_16_P18566180 | 9 | 16808900 | 16808959 | 227717 | BNC2                     | 1.263744 | 0.926435 | -1.131685 | 1.5249639 |
| A_16_P18566193 | 9 | 16814095 | 16814154 | 232633 | BNC2                     | 1.589292 | 1.063286 | -0.725095 | 1.8172772 |
| A_14_P129982   | 9 | 16824893 | 16824952 | 115749 | BNC2                     | 1.521026 | 1.311698 | -0.407807 | 2.062691  |
| A_16_P02069223 | 9 | 16830222 | 16830281 | 71103  | BNC2                     | 1.987236 | 1.622001 | -0.141362 | 2.6055143 |
| A_16_P18566270 | 9 | 16837938 | 16837997 | 194194 | BNC2                     | 1.481771 | 1.108484 | -0.711528 | 1.9518595 |
| A_16_P38663370 | 9 | 16846821 | 16846880 | 19440  | BNC2                     | 1.501885 | 1.365529 | -0.793813 | 1.8150605 |
| A_16_P18566308 | 9 | 16855805 | 16855864 | 241993 | BNC2                     | 0.982283 | 0.704249 | -1.590777 | 1.1632491 |
| A_16_P18566336 | 9 | 16863222 | 16863281 | 222063 | chr9:016863222-016863281 | 1.127035 | 0.970008 | -1.029076 | 1.3134625 |
| A_16_P38663426 | 9 | 16871779 | 16871838 | 129625 | chr9:016871779-016871838 | 1.241918 | 0.852054 | -1.137484 | 1.3884919 |
| A_16_P18566379 | 9 | 16887519 | 16887578 | 58587  | chr9:016887519-016887578 | 1.996367 | 1.624522 | -0.149885 | 2.3544185 |
| A_16_P18566432 | 9 | 16907771 | 16907830 | 219708 | chr9:016907771-016907830 | 1.817577 | 1.408422 | -0.31403  | 2.1750584 |
| A_16_P18566486 | 9 | 16937288 | 16937347 | 206333 | chr9:016937288-016937347 | 1.689463 | 0.852886 | -0.153164 | 2.2615056 |
| A_16_P18566536 | 9 | 16960736 | 16960795 | 5703   | chr9:016960736-016960795 | 1.421228 | 1.024019 | -0.775095 | 1.735863  |
| A_16_P18566607 | 9 | 16990895 | 16990954 | 5657   | chr9:016990895-016990954 | 1.766588 | 1.382733 | -0.567045 | 2.1668665 |
| A_14_P113415   | 9 | 17010094 | 17010153 | 185347 | chr9:017010094-017010153 | 1.162047 | 0.927049 | -1.002263 | 1.3654364 |
| A_16_P02069498 | 9 | 17032766 | 17032825 | 204263 | chr9:017032766-017032825 | 1.502125 | 1.199385 | -0.800112 | 1.770095  |
| A_16_P18566758 | 9 | 17047595 | 17047654 | 64517  | chr9:017047595-017047654 | 1.582191 | 1.336671 | -0.528007 | 2.1409225 |
| A_16_P02069584 | 9 | 17084310 | 17084369 | 156287 | chr9:017084310-017084369 | 1.79576  | 1.44143  | -0.397161 | 2.0430448 |
| A_16_P02069586 | 9 | 17098406 | 17098465 | 15385  | chr9:017098406-017098465 | 1.614147 | 1.318634 | -0.592077 | 1.9491315 |
| A_16_P18566894 | 9 | 17111705 | 17111764 | 7960   | chr9:017111705-017111764 | 1.923575 | 1.611094 | -0.109225 | 2.421168  |
| A_16_P18566917 | 9 | 17120821 | 17120880 | 97552  | chr9:017120821-017120880 | 1.716385 | 1.321273 | -0.545112 | 1.9099295 |
| A_16_P18566932 | 9 | 17126231 | 17126290 | 66203  | C9orf39                  | 1.416363 | 1.106921 | -0.749255 | 1.6218779 |
| A_14_P111589   | 9 | 17133289 | 17133348 | 155837 | C9orf39                  | 1.396462 | 1.151787 | -0.737167 | 1.5943186 |
| A_16_P38664044 | 9 | 17147190 | 17147249 | 131542 | C9orf39                  | 1.230646 | 1.014572 | -0.994969 | 1.5564402 |
| A_16_P02069642 | 9 | 17152457 | 17152516 | 230008 | C9orf39                  | 1.388115 | 1.101509 | -0.774215 | 1.615057  |
| A_16_P02069649 | 9 | 17157590 | 17157649 | 159099 | C9orf39                  | 1.609918 | 1.298543 | -0.571516 | 1.8852519 |
| A_16_P18566986 | 9 | 17162718 | 17162777 | 91397  | C9orf39                  | 1.091772 | 0.840274 | -1.115015 | 1.4296396 |
| A_16_P38664091 | 9 | 17176326 | 17176385 | 207409 | C9orf39                  | 1.672992 | 1.214136 | -0.784893 | 1.7316114 |
| A_14_P139298   | 9 | 17185765 | 17185824 | 125963 | C9orf39                  | 1.405639 | 1.100412 | -0.710295 | 1.774823  |
| A_16_P18567027 | 9 | 17199790 | 17199849 | 110588 | C9orf39                  | 1.578938 | 1.191567 | -0.896482 | 1.7528236 |
| A_16_P18567042 | 9 | 17209597 | 17209656 | 124881 | C9orf39                  | 1.385569 | 1.161166 | -0.820851 | 1.8328407 |
| A_16_P38664134 | 9 | 17215015 | 17215074 | 85818  | C9orf39                  | 1.531099 | 1.154699 | -0.6605   | 2.01692   |
| A_14_P134003   | 9 | 17225697 | 17225756 | 131210 | C9orf39                  | 1.326782 | 1.055112 | -0.800867 | 1.654019  |
| A_16_P38664175 | 9 | 17228083 | 17228142 | 114565 | C9orf39                  | 1.271715 | 0.913317 | -0.994606 | 1.4525639 |
| A_16_P18567086 | 9 | 17260655 | 17260714 | 22843  | C9orf39                  | 1.271715 | 0.82097  | -1.19398  | 1.4747422 |
| A_16_P02069724 | 9 | 17269562 | 17269621 | 189774 | C9orf39                  | 1.662768 | 1.182676 | -0.821793 | 1.8489871 |
| A_16_P38664207 | 9 | 17285796 | 17285855 | 50875  | C9orf39                  | 0.840494 | 0.98135  | -0.540271 | 1.7420504 |
| A_14_P111571   | 9 | 17288850 | 17288909 | 84695  | C9orf39                  | 1.794403 | 1.456613 | -0.465294 | 1.9714309 |
| A_16_P02069743 | 9 | 17295984 | 17296043 | 99154  | C9orf39                  | 1.945118 | 1.424021 | -0.388291 | 2.1035006 |
| A_16_P18567171 | 9 | 17311219 | 17311278 | 198293 | C9orf39                  | 1.457193 | 1.118676 | -0.719691 | 1.7690285 |
| A_16_P18567208 | 9 | 17322539 | 17322598 | 313    | C9orf39                  | 1.276978 | 0.896327 | -1.098112 | 1.4500172 |
| A_14_P115836   | 9 | 17332315 | 17332374 | 62260  | C9orf39                  | 1.655495 | 1.131288 | -0.729188 | 1.8963897 |

|                |   |          |          |        |                          |          |          |           |           |
|----------------|---|----------|----------|--------|--------------------------|----------|----------|-----------|-----------|
| A_16_P18567248 | 9 | 17339596 | 17339655 | 227784 | C9orf39                  | 1.363033 | 0.893965 | -1.039505 | 1.3881266 |
| A_16_P18567264 | 9 | 17347695 | 17347754 | 60     | C9orf39                  | 0.727032 | 0.308227 | -1.636911 | 0.9384129 |
| A_16_P38664376 | 9 | 17354927 | 17354986 | 154403 | C9orf39                  | 1.341003 | 0.918533 | -0.607148 | 1.9493388 |
| A_16_P18567286 | 9 | 17369886 | 17369945 | 29806  | C9orf39                  | 1.40974  | 1.102097 | -0.875945 | 1.6200153 |
| A_16_P02069841 | 9 | 17378206 | 17378265 | 127031 | C9orf39                  | 1.016828 | 0.629922 | -1.255929 | 1.2442434 |
| A_16_P18567328 | 9 | 17384882 | 17384941 | 183641 | C9orf39                  | 0.692968 | 0.255811 | -1.603899 | 0.7427997 |
| A_16_P18567347 | 9 | 17392102 | 17392161 | 209963 | C9orf39                  | 1.43971  | 0.948379 | -1.050294 | 1.5699292 |
| A_16_P02069865 | 9 | 17399319 | 17399378 | 175843 | C9orf39                  | 1.50807  | 1.09781  | -0.903668 | 1.8010889 |
| A_16_P02069871 | 9 | 17405812 | 17405871 | 73622  | C9orf39                  | 1.183893 | 0.704399 | -0.954148 | 1.4233189 |
| A_16_P18567383 | 9 | 17414228 | 17414287 | 217467 | C9orf39                  | 1.258858 | 0.893317 | -1.105447 | 1.6100659 |
| A_16_P18567402 | 9 | 17423046 | 17423105 | 32343  | C9orf39                  | 1.240182 | 0.916213 | -1.16366  | 1.3548088 |
| A_16_P18567417 | 9 | 17429244 | 17429303 | 216036 | C9orf39                  | 1.13401  | 0.623576 | -1.525031 | 1.2542477 |
| A_16_P18567420 | 9 | 17434636 | 17434695 | 198028 | C9orf39                  | 1.550127 | 1.041667 | -0.787595 | 1.6911377 |
| A_16_P18567441 | 9 | 17441739 | 17441798 | 58588  | C9orf39                  | 1.607728 | 1.243033 | -0.573273 | 1.9250462 |
| A_16_P38664572 | 9 | 17447565 | 17447624 | 161179 | C9orf39                  | 1.662387 | 1.110612 | -0.604898 | 1.9649405 |
| A_14_P135776   | 9 | 17456848 | 17456907 | 80624  | C9orf39                  | 1.263367 | 0.85282  | -1.093117 | 1.6573923 |
| A_16_P02069966 | 9 | 17474422 | 17474481 | 158428 | C9orf39                  | 1.197882 | 0.787268 | -1.213015 | 1.4792356 |
| A_16_P38664669 | 9 | 17480845 | 17480904 | 239354 | C9orf39                  | 1.187909 | 0.737689 | -0.319728 | 1.3318713 |
| A_16_P18567569 | 9 | 17487706 | 17487765 | 166703 | C9orf39                  | 1.476111 | 0.967501 | -0.984346 | 1.608735  |
| A_14_P102486   | 9 | 17492885 | 17492944 | 37262  | C9orf39                  | 1.068788 | 0.643765 | -1.95699  | 1.0789131 |
| A_16_P38664718 | 9 | 17502109 | 17502168 | 128270 | chr9:017502109-017502168 | 2.236022 | 1.584621 | 0.013235  | 2.6028776 |
| A_16_P02070018 | 9 | 17511741 | 17511800 | 154695 | chr9:017511741-017511800 | 1.691883 | 1.174838 | -0.754318 | 1.6762595 |
| A_16_P18567650 | 9 | 17523269 | 17523328 | 183417 | chr9:017523269-017523328 | 1.774164 | 1.42999  | -0.440513 | 2.093522  |
| A_16_P38664803 | 9 | 17545943 | 17546002 | 151109 | chr9:017545943-017546002 | 1.718321 | 1.165967 | -0.441768 | 2.052836  |
| A_16_P18567696 | 9 | 17554830 | 17554889 | 23340  | chr9:017554830-017554889 | 1.677369 | 1.145176 | -0.657995 | 1.7727178 |
| A_14_P123391   | 9 | 17568661 | 17568717 | 183526 | chr9:017568661-017568717 | 2.300771 | 1.585673 | -0.159958 | 2.5322292 |
| A_16_P18567778 | 9 | 17585185 | 17585244 | 187174 | SH3GL2                   | 2.003835 | 1.467329 | -0.792153 | 2.1777258 |
| A_16_P02070131 | 9 | 17595929 | 17595988 | 148263 | SH3GL2                   | 2.098919 | 1.745775 | 0.0446    | 2.4751856 |
| A_16_P18567828 | 9 | 17601112 | 17601171 | 1557   | SH3GL2                   | 1.700533 | 1.226936 | -0.532458 | 1.8605632 |
| A_16_P18567849 | 9 | 17607645 | 17607704 | 203590 | SH3GL2                   | 1.74343  | 1.246303 | -0.703877 | 1.9421014 |
| A_14_P107438   | 9 | 17620872 | 17620931 | 124052 | SH3GL2                   | 1.457118 | 1.266453 | -0.216414 | 1.596245  |
| A_16_P18567909 | 9 | 17626610 | 17626669 | 228818 | SH3GL2                   | 1.809077 | 1.43349  | -0.560952 | 1.980619  |
| A_16_P18567931 | 9 | 17639657 | 17639716 | 125748 | SH3GL2                   | 1.371188 | 0.933528 | -0.779987 | 1.5459335 |
| A_16_P18567954 | 9 | 17646958 | 17647017 | 114636 | SH3GL2                   | 1.472335 | 1.074673 | -0.963209 | 1.5267149 |
| A_16_P38665092 | 9 | 17654330 | 17654389 | 92491  | SH3GL2                   | 1.564193 | 1.189457 | -0.778687 | 1.506555  |
| A_16_P18567997 | 9 | 17665345 | 17665404 | 154245 | SH3GL2                   | 1.318871 | 0.640528 | -1.099342 | 1.4499025 |
| A_16_P18568014 | 9 | 17677721 | 17677780 | 33383  | SH3GL2                   | 1.820885 | 1.087035 | -0.681218 | 1.8298247 |
| A_16_P02070273 | 9 | 17687863 | 17687922 | 152549 | SH3GL2                   | 1.989865 | 1.091878 | -0.873194 | 1.7693835 |
| A_14_P100445   | 9 | 17699065 | 17699124 | 14907  | SH3GL2                   | 1.557448 | 1.072493 | -0.803032 | 1.7253771 |
| A_16_P02070300 | 9 | 17710181 | 17710240 | 122830 | SH3GL2                   | 1.991616 | 1.67373  | -0.094482 | 2.4493167 |
| A_16_P02070324 | 9 | 17726642 | 17726701 | 232724 | SH3GL2                   | 1.60275  | 1.192546 | -0.637594 | 1.9304787 |
| A_16_P02070340 | 9 | 17735393 | 17735452 | 42041  | SH3GL2                   | 1.450415 | 1.063092 | -1.018634 | 1.7528077 |
| A_16_P18568176 | 9 | 17745851 | 17745910 | 112938 | SH3GL2                   | 1.424867 | 1.04924  | -1.018852 | 1.6257445 |
| A_14_P112252   | 9 | 17751453 | 17751511 | 112354 | SH3GL2                   | 1.987096 | 1.51861  | -0.13825  | 2.2743497 |
| A_16_P18568208 | 9 | 17756943 | 17757002 | 174589 | SH3GL2                   | 1.72443  | 1.120662 | -0.981988 | 1.5867101 |
| A_16_P02070391 | 9 | 17774371 | 17774430 | 112257 | SH3GL2                   | 1.787297 | 1.329285 | -0.464419 | 2.0702395 |
| A_14_P101372   | 9 | 17786669 | 17786728 | 41997  | SH3GL2                   | 1.557044 | 1.208953 | -0.450842 | 2.0735831 |
| A_16_P18568301 | 9 | 17792294 | 17792353 | 231567 | chr9:017792294-017792353 | 1.862047 | 1.475785 | -0.409518 | 2.2634304 |
| A_16_P02070452 | 9 | 17806929 | 17806988 | 7250   | chr9:017806929-017806988 | 1.434115 | 0.838472 | -1.05633  | 1.3268324 |
| A_16_P02070464 | 9 | 17818708 | 17818767 | 142924 | chr9:017818708-017818767 | 2.045221 | 1.550905 | -0.244346 | 2.2553744 |
| A_14_P123124   | 9 | 17841059 | 17841118 | 129602 | chr9:017841059-017841118 | 0.967011 | 0.191027 | -1.607132 | 0.8882913 |
| A_16_P18568486 | 9 | 17870008 | 17870067 | 196222 | chr9:017870008-017870067 | 1.422215 | 1.098798 | -0.880071 | 1.571761  |
| A_16_P02070614 | 9 | 17920993 | 17921052 | 74264  | chr9:017920993-017921052 | 1.803805 | 1.318181 | -0.420706 | 1.636194  |
| A_16_P18568676 | 9 | 17953821 | 17953880 | 106437 | chr9:017953821-017953880 | 1.758695 | 1.27781  | -0.438057 | 1.9483275 |
| A_14_P117097   | 9 | 17975541 | 17975600 | 153919 | chr9:017975541-017975600 | 1.412395 | 0.969226 | -0.897077 | 1.3977351 |
| A_16_P38665911 | 9 | 17995659 | 17995717 | 29675  | chr9:017995659-017995717 | 2.043001 | 1.469544 | -0.46125  | 2.3424332 |
| A_16_P02070756 | 9 | 18024295 | 18024354 | 99642  | chr9:018024295-018024354 | 2.030764 | 1.585227 | -0.11533  | 2.4024947 |
| A_16_P18568968 | 9 | 18063298 | 18063357 | 84637  | chr9:018063298-018063357 | 1.481963 | 0.979177 | -1.042694 | 1.4719615 |
| A_16_P18569071 | 9 | 18101168 | 18101227 | 128434 | chr9:018101168-018101227 | 1.981369 | 1.407495 | -0.405066 | 2.1240299 |
| A_16_P18569148 | 9 | 18124944 | 18125003 | 237899 | chr9:018124944-018125003 | 2.193233 | 1.635753 | -0.042869 | 2.2745104 |
| A_16_P02070968 | 9 | 18146540 | 18146599 | 50745  | chr9:018146540-018146599 | 1.476923 | 1.060497 | -1.037992 | 1.6343251 |
| A_14_P119503   | 9 | 18176747 | 18176806 | 203506 | chr9:018176747-018176806 | 1.439292 | 1.051234 | -0.857719 | 1.5505201 |
| A_16_P02071104 | 9 | 18233672 | 18233731 | 205873 | chr9:018233672-018233731 | 2.190215 | 1.866656 | 0.122292  | 2.539065  |
| A_14_P129588   | 9 | 18278809 | 18278868 | 39062  | chr9:018278809-018278868 | 2.143787 | 1.583149 | 0.074219  | 2.216376  |
| A_16_P18569600 | 9 | 18316614 | 18316673 | 109181 | chr9:018316614-018316673 | 1.686324 | 1.312939 | -0.521816 | 1.7656524 |
| A_16_P18569672 | 9 | 18341108 | 18341167 | 157417 | chr9:018341108-018341167 | 1.897711 | 1.554656 | -0.145412 | 2.0009801 |
| A_16_P18569758 | 9 | 18368491 | 18368550 | 47311  | chr9:018368491-018368550 | 1.631962 | 1.210897 | -0.741569 | 1.7468604 |
| A_14_P135045   | 9 | 18388255 | 18388314 | 188270 | chr9:018388255-018388314 | 1.690636 | 1.235224 | -0.31312  | 1.9955816 |
| A_16_P02071385 | 9 | 18421312 | 18421371 | 22316  | chr9:018421312-018421371 | 1.878696 | 1.337944 | -0.577442 | 1.8906637 |
| A_16_P02071414 | 9 | 18436209 | 18436268 | 37553  | chr9:018436209-018436268 | 1.80813  | 1.416442 | -0.461272 | 2.0040555 |
| A_16_P18569994 | 9 | 18456806 | 18456865 | 229457 | chr9:018456806-018456865 | 1.631487 | 1.170631 | -0.572062 | 1.8098726 |
| A_14_P121984   | 9 | 18464451 | 18464510 | 226321 | ADAMTSL1                 | 1.531063 | 1.153483 | -0.467612 | 1.8230901 |
| A_16_P38667161 | 9 | 18471849 | 18471908 | 231432 | ADAMTSL1                 | 1.476277 | 1.051874 | -0.833216 | 1.6049147 |

|                 |   |          |          |        |                          |          |          |           |              |
|-----------------|---|----------|----------|--------|--------------------------|----------|----------|-----------|--------------|
| A_16_P02071496  | 9 | 18478203 | 18478262 | 63163  | ADAMTSL1                 | 2.050314 | 1.559984 | -0.146448 | 2.153843     |
| A_16_P02071509  | 9 | 18484555 | 18484614 | 178702 | ADAMTSL1                 | 2.024924 | 1.662703 | -0.037434 | 2.3456795    |
| A_16_P02071522  | 9 | 18490344 | 18490403 | 149683 | ADAMTSL1                 | 1.81647  | 1.304552 | -0.518525 | 1.8649359    |
| A_16_P18570150  | 9 | 18505917 | 18505976 | 136448 | ADAMTSL1                 | 1.987328 | 1.483709 | -0.19047  | 2.2209797    |
| A_14_P124537    | 9 | 18523248 | 18523307 | 94830  | ADAMTSL1                 | 1.067573 | 0.61846  | -1.041219 | 1.2682495    |
| A_16_P18570203  | 9 | 18528550 | 18528609 | 204923 | ADAMTSL1                 | 1.673972 | 1.161244 | -0.461115 | 1.8921157    |
| A_16_P38667338  | 9 | 18535670 | 18535729 | 233804 | ADAMTSL1                 | 1.291906 | 0.709794 | -1.185603 | 1.2496656    |
| A_16_P02071600  | 9 | 18544519 | 18544578 | 237025 | ADAMTSL1                 | 2.313786 | 1.723671 | 0.131076  | 2.503267     |
| A_16_P18570260  | 9 | 18559352 | 18559411 | 223843 | ADAMTSL1                 | 1.905356 | 1.379506 | -0.349591 | 2.0527024    |
| A_14_P116569    | 9 | 18564217 | 18564273 | 163723 | ADAMTSL1                 | 1.618899 | 1.102012 | -0.548051 | 1.6641362    |
| A_16_P38667411  | 9 | 18575192 | 18575251 | 194313 | ADAMTSL1                 | 0.943333 | 0.465532 | -1.627299 | -1.057446    |
| A_16_P02071648  | 9 | 18590944 | 18591003 | 58305  | ADAMTSL1                 | 1.829153 | 1.41346  | -0.462719 | 0.36266607   |
| A_16_P18570353  | 9 | 18601611 | 18601670 | 14397  | ADAMTSL1                 | 1.785289 | 1.307899 | -0.571153 | 0.026564062  |
| A_16_P185701691 | 9 | 18613705 | 18613764 | 20735  | ADAMTSL1                 | 2.051129 | 1.537446 | -0.262118 | 0.3481142    |
| A_14_P121190    | 9 | 18629234 | 18629284 | 77631  | ADAMTSL1                 | 1.63231  | 1.216493 | -0.570923 | -0.059163272 |
| A_16_P02071731  | 9 | 18644753 | 18644812 | 144120 | ADAMTSL1                 | 1.678062 | 1.260103 | -0.623863 | 0.08462706   |
| A_16_P18570466  | 9 | 18649920 | 18649979 | 148549 | ADAMTSL1                 | 0.96667  | 0.466954 | -1.304851 | -0.8538604   |
| A_16_P18570489  | 9 | 18656044 | 18656103 | 183638 | ADAMTSL1                 | 1.793699 | 1.333706 | -0.586043 | 0.03987904   |
| A_16_P02071778  | 9 | 18665838 | 18665894 | 172745 | ADAMTSL1                 | 1.115322 | 0.584431 | -1.366328 | -0.500721    |
| A_14_P132270    | 9 | 18671030 | 18671089 | 48940  | ADAMTSL1                 | 1.493621 | 1.261454 | -0.896138 | -0.3851515   |
| A_16_P02071810  | 9 | 18680838 | 18680897 | 172904 | ADAMTSL1                 | 1.465701 | 1.041537 | -0.846683 | -0.15927774  |
| A_16_P18570588  | 9 | 18689102 | 18689161 | 171777 | ADAMTSL1                 | 1.353237 | 1.016744 | -0.896296 | -0.5603595   |
| A_16_P18570620  | 9 | 18698744 | 18698803 | 179953 | ADAMTSL1                 | 2.056569 | 1.605209 | -0.20714  | 0.21976295   |
| A_16_P02071852  | 9 | 18711114 | 18711173 | 50479  | ADAMTSL1                 | 2.485197 | 1.982309 | 0.378717  | 0.96404487   |
| A_16_P38667799  | 9 | 18720047 | 18720106 | 153514 | chr9:018720047-018720106 | 1.444679 | 1.145831 | -0.978272 | -0.2698846   |
| A_14_P124587    | 9 | 18733237 | 18733296 | 78880  | chr9:018733237-018733296 | 2.113657 | 1.712086 | 0.317865  | 0.57071275   |
| A_16_P18570741  | 9 | 18742827 | 18742886 | 207629 | chr9:018742827-018742886 | 1.394303 | 0.910495 | -1.237463 | -0.58269805  |
| A_16_P18570796  | 9 | 18761843 | 18761902 | 25765  | chr9:018761843-018761902 | 1.649701 | 1.23686  | -0.610109 | 0.021306187  |
| A_16_P02071999  | 9 | 18786432 | 18786491 | 132045 | BX640951                 | 2.061436 | 1.532007 | -0.21303  | 0.31616578   |
| A_16_P18570896  | 9 | 18794148 | 18794207 | 219335 | BX640951                 | 1.019116 | 0.461722 | -1.29606  | -0.7719669   |
| A_16_P18570928  | 9 | 18810734 | 18810793 | 72922  | BX640951                 | 1.819228 | 1.21985  | -0.542832 | 0.088880986  |
| A_16_P18570955  | 9 | 18819330 | 18819388 | 21340  | C9orf94                  | 1.92941  | 1.544814 | -0.351564 | 0.287736     |
| A_14_P118808    | 9 | 18828925 | 18828984 | 9493   | C9orf94                  | 1.58842  | 1.266398 | -0.570946 | -0.05268556  |
| A_16_P18570974  | 9 | 18835229 | 18835273 | 66679  | C9orf94                  | 1.971413 | 1.539922 | -0.171899 | 0.4999016    |
| A_16_P02072071  | 9 | 18841087 | 18841146 | 123897 | C9orf94                  | 1.407018 | 1.002651 | -1.028565 | -0.46046627  |
| A_16_P18571012  | 9 | 18846901 | 18846960 | 129079 | C9orf94                  | 1.767788 | 1.560678 | -0.569471 | 0.25999323   |
| A_16_P38668156  | 9 | 18852547 | 18852606 | 181534 | C9orf94                  | 2.185112 | 1.636001 | -0.374811 | 0.1795044    |
| A_16_P38668175  | 9 | 18860912 | 18860971 | 188814 | C9orf94                  | 1.699295 | 1.289481 | -0.562276 | -0.18560448  |
| A_16_P38668186  | 9 | 18872220 | 18872279 | 61366  | C9orf94                  | 2.148778 | 1.821823 | 0.105246  | 0.49982575   |
| A_14_P129080    | 9 | 18882921 | 18882980 | 14660  | C9orf94                  | 1.869662 | 1.563742 | -0.185498 | 0.3108437    |
| A_16_P02072136  | 9 | 18899604 | 18899663 | 87616  | BX640951                 | 1.75164  | 1.565173 | -0.525865 | -0.07115489  |
| A_16_P02072153  | 9 | 18906666 | 18906725 | 132997 | chr9:018906666-018906725 | 2.322921 | 1.925613 | 0.122726  | 0.764797     |
| A_16_P02072177  | 9 | 18917948 | 18918007 | 227368 | C9orf138                 | 1.109308 | 0.645863 | -1.683804 | -0.857195    |
| A_16_P02072184  | 9 | 18926518 | 18926577 | 134035 | C9orf138                 | 1.594249 | 1.169419 | -0.742441 | -0.073523074 |
| A_16_P38668338  | 9 | 18931715 | 18931773 | 223670 | C9orf138                 | 2.079475 | 1.97127  | 0.136775  | 0.8044988    |
| A_14_P100522    | 9 | 18940859 | 18940918 | 44298  | C9orf138                 | 2.376985 | 1.695413 | 0.189571  | 0.57352436   |
| A_16_P18571241  | 9 | 18947155 | 18947214 | 2195   | C9orf138                 | 1.863869 | 1.374598 | -0.431022 | 0.1716492    |
| A_16_P18571266  | 9 | 18961536 | 18961595 | 151025 | C9orf138                 | 1.093023 | 0.63215  | -1.462603 | -0.6083034   |
| A_16_P18571306  | 9 | 18972720 | 18972779 | 32652  | C9orf138                 | 1.664751 | 1.183914 | -1.068673 | -0.23464096  |
| A_14_P130412    | 9 | 18983768 | 18983827 | 195984 | C9orf138                 | 1.05238  | 0.577242 | -0.89956  | -0.5718142   |
| A_16_P02072288  | 9 | 18999711 | 18999770 | 54312  | C9orf138                 | 1.616835 | 1.120433 | -0.65164  | -0.12625954  |
| A_14_P106917    | 9 | 19012646 | 19012705 | 155379 | C9orf138                 | 1.538602 | 1.426755 | -0.55677  | 0.031876966  |
| A_16_P02072337  | 9 | 19025007 | 19025066 | 158949 | chr9:019025007-019025066 | 2.26297  | 1.806404 | 0.20464   | 0.792793     |
| A_16_P02072339  | 9 | 19029291 | 19029350 | 194642 | chr9:019029291-019029350 | 1.546651 | 1.193717 | -0.595508 | -0.16818067  |
| A_16_P18571437  | 9 | 19034310 | 19034369 | 240058 | chr9:019034310-019034369 | 1.132517 | 0.465868 | -1.34244  | -0.9673606   |
| A_14_P102520    | 9 | 19040855 | 19040914 | 203529 | RRAGA                    | 1.95522  | 1.555775 | -0.265078 | 0.18325093   |
| A_14_P110216    | 9 | 19047618 | 19047677 | 28460  | FAM29A                   | 1.585168 | 1.352291 | -0.268614 | 0.12530018   |
| A_14_P100674    | 9 | 19047891 | 19047950 | 150892 | FAM29A                   | 1.298707 | 1.014381 | -1.122542 | -0.53985065  |
| A_16_P18571487  | 9 | 19051850 | 19051908 | 210961 | FAM29A                   | 1.587985 | 1.253738 | -0.645107 | -0.06819007  |
| A_16_P18571500  | 9 | 19056516 | 19056575 | 129590 | FAM29A                   | 1.897473 | 1.402298 | -0.346979 | 0.26816496   |
| A_16_P18571532  | 9 | 19070660 | 19070719 | 160828 | FAM29A                   | 1.692061 | 1.204182 | -0.473536 | 0.095166676  |
| A_16_P38668707  | 9 | 19079530 | 19079589 | 129712 | FAM29A                   | 1.840824 | 1.545811 | -0.178946 | 0.4528521    |
| A_14_P106258    | 9 | 19086648 | 19086707 | 196653 | FAM29A                   | 0.885024 | 0.57899  | -0.697457 | -0.28168866  |
| A_14_P106258    | 9 | 19086648 | 19086707 | 208174 | FAM29A                   | 0.996681 | 0.550553 | -0.742502 | -0.31050897  |
| A_14_P106258    | 9 | 19086648 | 19086707 | 80217  | FAM29A                   | 0.946927 | 0.54161  | -0.664781 | -0.47278905  |
| A_16_P18571586  | 9 | 19092035 | 19092094 | 176769 | FAM29A                   | 1.477689 | 1.028882 | -0.095731 | -0.5881165   |
| A_16_P18571602  | 9 | 19102187 | 19102246 | 169121 | chr9:019102187-019102246 | 2.193566 | 1.656722 | -0.054033 | 0.56154406   |
| A_16_P02072427  | 9 | 19105743 | 19105802 | 359    | ADFP                     | 1.749788 | 1.318598 | -0.454104 | -0.21239942  |
| A_14_P118582    | 9 | 19110377 | 19110436 | 12890  | ADFP                     | 1.413225 | 1.032755 | -0.9561   | -0.45520288  |
| A_16_P18571642  | 9 | 19116423 | 19116482 | 196213 | ADFP                     | 2.235398 | 1.305144 | 0.015822  | -0.1818563   |
| A_16_P18571663  | 9 | 19127495 | 19127554 | 146191 | AKO94196                 | 2.59103  | 2.000003 | 0.456385  | 0.97666305   |
| A_16_P38668843  | 9 | 19133230 | 19133289 | 168743 | AKO94196                 | 2.490877 | 2.074184 | 0.621042  | 0.73341066   |
| A_16_P02072469  | 9 | 19139589 | 19139648 | 212647 | chr9:019139589-019139648 | 2.754432 | 2.255894 | 0.765749  | 1.1624033    |

|                |   |          |          |        |                          |          |          |           |              |
|----------------|---|----------|----------|--------|--------------------------|----------|----------|-----------|--------------|
| A_16_P18571716 | 9 | 19148673 | 19148732 | 183415 | chr9:019148673-019148732 | 2.000287 | 1.517983 | -0.076325 | 0.31470102   |
| A_16_P18571736 | 9 | 19166158 | 19166217 | 114250 | chr9:019166158-019166217 | 2.152648 | 1.792177 | 0.097341  | 0.51438856   |
| A_14_P105692   | 9 | 19203822 | 19203881 | 223994 | chr9:019203822-019203881 | 1.324173 | 0.828787 | -1.078705 | -0.58593285  |
| A_16_P38668997 | 9 | 19218097 | 19218156 | 126458 | chr9:019218097-019218156 | 2.149806 | 1.824787 | 0.167336  | 0.51665586   |
| A_16_P18571866 | 9 | 19243055 | 19243114 | 146015 | chr9:019243055-019243114 | 1.379767 | 1.022746 | -0.878768 | -0.32585967  |
| A_16_P18571880 | 9 | 19266977 | 19267036 | 112100 | chr9:019266977-019267036 | 2.479798 | 1.582164 | -0.167124 | 0.6965403    |
| A_16_P18571891 | 9 | 19273910 | 19273969 | 120432 | chr9:019273910-019273969 | 1.970351 | 1.692643 | -0.057586 | 0.43354473   |
| A_16_P38669075 | 9 | 19280555 | 19280614 | 9673   | AK000693                 | 1.692364 | 1.271439 | -0.662729 | -0.006619826 |
| A_14_P103673   | 9 | 19286099 | 19286158 | 186002 | DENND4C                  | 1.203852 | 0.605505 | -0.881295 | -0.27077827  |
| A_16_P18571946 | 9 | 19295428 | 19295487 | 40361  | DENND4C                  | 2.038843 | 1.678381 | -0.048066 | 0.65472376   |
| A_16_P18571955 | 9 | 19301448 | 19301507 | 176826 | DENND4C                  | 2.138884 | 1.710264 | 0.019474  | 0.55534554   |
| A_14_P108728   | 9 | 19314347 | 19314406 | 55249  | DENND4C                  | 1.722149 | 1.440669 | -0.149254 | 0.272707     |
| A_16_P02072630 | 9 | 19322152 | 19322211 | 137305 | DENND4C                  | 0.957348 | 0.641346 | -1.099387 | -0.7759585   |
| A_16_P02072641 | 9 | 19331009 | 19331067 | 233866 | DENND4C                  | 1.685358 | 1.289225 | -0.399895 | -0.059785426 |
| A_16_P18572049 | 9 | 19342116 | 19342175 | 56447  | DENND4C                  | 1.486725 | 1.118294 | -0.612751 | -0.15617329  |
| A_14_P101924   | 9 | 19347623 | 19347682 | 16901  | DENND4C                  | 0.508655 | 0.363486 | -1.781575 | -1.0682849   |
| A_16_P02072676 | 9 | 19358483 | 19358542 | 59667  | DENND4C                  | 1.801421 | 1.367332 | -0.241725 | 0.05281596   |
| A_16_P18572091 | 9 | 19362057 | 19362116 | 111461 | DENND4C                  | 1.801017 | 1.494175 | -0.458204 | 0.322414     |
| A_14_P135698   | 9 | 19368480 | 19368539 | 227894 | RPS6                     | 0.830505 | 0.68098  | 0.182662  | 0.5421772    |
| A_16_P18572137 | 9 | 19378267 | 19378326 | 12313  | chr9:019378267-019378326 | 1.971464 | 1.344947 | -0.416114 | 0.28747267   |
| A_14_P202313   | 9 | 19386608 | 19386667 | 167746 | chr9:019386608-019386667 | 1.383627 | 1.180733 | -0.40625  | 0.070155516  |
| A_16_P18572154 | 9 | 19391873 | 19391932 | 112205 | AF370405                 | 1.651549 | 1.207796 | -0.454144 | 0.03472449   |
| A_16_P18572166 | 9 | 19397100 | 19397159 | 34347  | AF370405                 | 1.628273 | 1.179339 | -0.515346 | -0.15796724  |
| A_16_P18572214 | 9 | 19415150 | 19415209 | 197582 | ASAH3L                   | 1.701105 | 1.297488 | -0.422911 | 0.09465938   |
| A_16_P18572234 | 9 | 19422134 | 19422193 | 132070 | ASAH3L                   | 1.780625 | 1.465433 | -0.320285 | 0.20506357   |
| A_16_P02072777 | 9 | 19431347 | 19431405 | 55446  | ASAH3L                   | 1.860332 | 1.317428 | -0.41065  | 0.21032268   |
| A_16_P18572273 | 9 | 19438615 | 19438674 | 103727 | ASAH3L                   | 1.517738 | 1.170783 | -0.681332 | -0.2339687   |
| A_16_P38669523 | 9 | 19448798 | 19448857 | 171591 | chr9:019448798-019448857 | 1.482608 | 1.06943  | -0.667623 | -0.21533087  |
| A_16_P18572339 | 9 | 19460403 | 19460462 | 214792 | chr9:019460403-019460462 | 1.865693 | 1.516402 | -0.524146 | 0.26343012   |
| A_16_P02072835 | 9 | 19470278 | 19470337 | 87325  | chr9:019470278-019470337 | 1.971601 | 1.437295 | -0.536471 | 0.244591     |
| A_16_P02072864 | 9 | 19487546 | 19487605 | 166156 | chr9:019487546-019487605 | 2.320666 | 1.922328 | 0.227071  | 0.8445951    |
| A_14_P105218   | 9 | 19501524 | 19501583 | 157387 | AK127092                 | 1.716075 | 1.346017 | -0.419307 | 0.20375901   |
| A_16_P38669690 | 9 | 19511081 | 19511140 | 136661 | SLC24A2                  | 1.951511 | 1.490402 | -0.279056 | 0.23651603   |
| A_16_P38669722 | 9 | 19523171 | 19523230 | 107999 | SLC24A2                  | 0.824338 | 0.486716 | -1.650942 | -0.9394195   |
| A_14_P110734   | 9 | 19540125 | 19540179 | 142870 | SLC24A2                  | 1.893332 | 1.585985 | -0.158102 | 0.29117253   |
| A_16_P18572532 | 9 | 19545983 | 19546042 | 127851 | SLC24A2                  | 1.689732 | 1.30218  | -0.505581 | 0.082555     |
| A_16_P18572562 | 9 | 19554273 | 19554332 | 109496 | SLC24A2                  | 1.462951 | 1.152868 | -0.693813 | -0.22975317  |
| A_16_P18572587 | 9 | 19566468 | 19566527 | 65640  | SLC24A2                  | 1.94908  | 1.416178 | -0.314903 | 0.18465081   |
| A_16_P18572622 | 9 | 19577317 | 19577376 | 81527  | SLC24A2                  | 1.590387 | 1.246557 | -0.682955 | -0.1159834   |
| A_14_P115404   | 9 | 19587233 | 19587292 | 160098 | SLC24A2                  | 1.633972 | 1.09248  | -0.549883 | -0.20366693  |
| A_16_P18572673 | 9 | 19593559 | 19593618 | 215211 | SLC24A2                  | 2.242058 | 1.820908 | 0.167201  | 0.8454897    |
| A_16_P02073048 | 9 | 19605204 | 19605263 | 176861 | SLC24A2                  | 1.849439 | 1.401472 | -0.392428 | 0.09208227   |
| A_16_P02073066 | 9 | 19612892 | 19612951 | 170143 | SLC24A2                  | 1.80103  | 1.451939 | -0.362784 | 0.2083503    |
| A_16_P18572760 | 9 | 19620553 | 19620612 | 128690 | SLC24A2                  | 0.913742 | 0.781416 | -1.383814 | -0.8172617   |
| A_16_P18572784 | 9 | 19628418 | 19628477 | 22785  | SLC24A2                  | 1.565113 | 1.172838 | -0.418452 | -0.07204682  |
| A_14_P100009   | 9 | 19636699 | 19636758 | 18574  | SLC24A2                  | 1.927296 | 1.641791 | -0.317515 | 0.43326813   |
| A_16_P18572857 | 9 | 19651342 | 19651401 | 13592  | SLC24A2                  | 1.771227 | 1.432386 | -0.503548 | -0.018787026 |
| A_16_P02073152 | 9 | 19658116 | 19658175 | 68763  | SLC24A2                  | 1.986369 | 1.530771 | -0.353389 | 0.29356837   |
| A_16_P02073160 | 9 | 19668794 | 19668853 | 216028 | SLC24A2                  | 1.559032 | 1.111796 | -0.78558  | -0.0586738   |
| A_16_P38670133 | 9 | 19677387 | 19677446 | 42893  | SLC24A2                  | 1.687029 | 1.113815 | -0.638896 | -0.021021381 |
| A_16_P18572947 | 9 | 19690843 | 19690902 | 183562 | SLC24A2                  | 1.555612 | 1.186469 | -0.71146  | -0.3848495   |
| A_16_P18572974 | 9 | 19703883 | 19703942 | 38592  | SLC24A2                  | 1.414832 | 0.948854 | -0.790651 | -0.24326432  |
| A_14_P116599   | 9 | 19716199 | 19716258 | 113352 | SLC24A2                  | 1.913577 | 1.491633 | -0.272825 | 0.39924568   |
| A_16_P38670267 | 9 | 19732116 | 19732175 | 123959 | SLC24A2                  | 1.660456 | 1.045586 | -0.912998 | -0.09865832  |
| A_16_P02073267 | 9 | 19738331 | 19738390 | 19063  | SLC24A2                  | 1.745068 | 1.431696 | -0.387469 | 0.35555977   |
| A_16_P18573093 | 9 | 19746132 | 19746191 | 198368 | SLC24A2                  | 2.166642 | 1.654866 | -0.20319  | 0.5167352    |
| A_16_P02073293 | 9 | 19760116 | 19760175 | 106775 | SLC24A2                  | 2.043131 | 1.469833 | -0.102173 | 0.30621234   |
| A_16_P18573134 | 9 | 19768036 | 19768095 | 133914 | SLC24A2                  | 1.739642 | 1.307676 | -0.535721 | -0.020300955 |
| A_14_P137232   | 9 | 19775974 | 19776033 | 171216 | SLC24A2                  | 1.417015 | 0.854912 | -0.906704 | -0.33103412  |
| A_16_P02073334 | 9 | 19783547 | 19783606 | 39552  | chr9:019783547-019783606 | 2.085589 | 1.549155 | -0.051507 | 0.50365365   |
| A_14_P109715   | 9 | 19804638 | 19804697 | 175382 | chr9:019804638-019804697 | 1.488796 | 1.101884 | -0.686839 | -0.003347054 |
| A_16_P18573280 | 9 | 19822387 | 19822446 | 85646  | chr9:019822387-019822446 | 1.707625 | 1.251732 | -0.699427 | -0.041546524 |
| A_16_P18573303 | 9 | 19846967 | 19847026 | 80982  | chr9:019846967-019847026 | 1.708269 | 1.330182 | -0.309128 | 0.30355743   |
| A_16_P38670525 | 9 | 19863894 | 19863953 | 178137 | chr9:019863894-019863953 | 1.686982 | 1.260985 | -0.690612 | -0.019849211 |
| A_16_P18573353 | 9 | 19882574 | 19882633 | 116458 | chr9:019882574-019882633 | 1.918489 | 1.508644 | -0.291405 | 0.4312942    |
| A_16_P02073446 | 9 | 19892639 | 19892698 | 242460 | chr9:019892639-019892698 | 1.93924  | 1.50555  | -0.29513  | 0.2650428    |
| A_14_P115522   | 9 | 19908661 | 19908720 | 59315  | chr9:019908661-019908720 | 2.400322 | 1.873131 | 0.102318  | 0.98238325   |
| A_16_P18573439 | 9 | 19917491 | 19917550 | 108640 | AK123856                 | 1.729974 | 1.25858  | -0.704491 | -0.054856956 |
| A_16_P02073517 | 9 | 19934911 | 19934970 | 122105 | chr9:019934911-019934970 | 1.930387 | 1.490508 | -0.363953 | 0.33033136   |
| A_16_P18573550 | 9 | 19956040 | 19956099 | 212504 | chr9:019956040-019956099 | 1.163447 | 0.867526 | -0.904662 | -0.37089437  |
| A_16_P02073591 | 9 | 19983767 | 19983826 | 46581  | chr9:019983767-019983826 | 2.247073 | 1.452393 | 0.09009   | 0.43820897   |
| A_16_P18573671 | 9 | 19997631 | 19997690 | 98521  | chr9:019997631-019997690 | 1.43455  | 0.932747 | -0.863991 | -0.53154355  |
| A_16_P18573694 | 9 | 20011931 | 20011990 | 170066 | chr9:020011931-020011990 | 2.045921 | 1.606053 | -0.336955 | 0.39742407   |

|                |   |          |          |        |                          |          |          |           |              |
|----------------|---|----------|----------|--------|--------------------------|----------|----------|-----------|--------------|
| A_16_P18573772 | 9 | 20038412 | 20038471 | 55451  | chr9:020038412-020038471 | 1.174083 | 0.843249 | -1.231257 | -0.5686737   |
| A_16_P38671024 | 9 | 20056456 | 20056515 | 101671 | chr9:020056456-020056515 | 1.571351 | 1.118171 | -0.658573 | 0.00972487   |
| A_16_P18573863 | 9 | 20086935 | 20086994 | 211747 | chr9:020086935-020086994 | 2.001985 | 1.606749 | -0.142574 | 0.28741357   |
| A_14_P119246   | 9 | 20111574 | 20111633 | 122717 | chr9:020111574-020111633 | 1.745826 | 1.372279 | -0.661509 | 0.18299508   |
| A_16_P38671217 | 9 | 20141095 | 20141154 | 134808 | chr9:020141095-020141154 | 1.702195 | 1.332999 | -0.523863 | 0.27079085   |
| A_16_P18574029 | 9 | 20166373 | 20166432 | 167011 | chr9:020166373-020166432 | 1.375517 | 0.895719 | -0.515347 | -0.37469953  |
| A_16_P38671295 | 9 | 20185733 | 20185792 | 118888 | chr9:020185733-020185792 | 1.256318 | 1.371151 | -0.620823 | 0.12531693   |
| A_14_P131247   | 9 | 20208937 | 20208996 | 185302 | chr9:020208937-020208996 | 1.31709  | 1.440525 | -0.28717  | 0.06512733   |
| A_16_P18574219 | 9 | 20240034 | 20240093 | 79828  | chr9:020240034-020240093 | 1.120728 | 1.226573 | -0.830347 | -0.19870323  |
| A_16_P18574262 | 9 | 20256431 | 20256490 | 39556  | chr9:020256431-020256490 | 1.336932 | 1.321112 | -0.678702 | 0.17744526   |
| A_16_P02074000 | 9 | 20280211 | 20280270 | 213834 | chr9:020280211-020280270 | 1.302141 | 1.254571 | -0.642729 | -0.0842334   |
| A_14_P127715   | 9 | 20300511 | 20300570 | 239481 | chr9:020300511-020300570 | 1.185113 | 1.13354  | -0.848366 | -0.066076815 |
| A_16_P02074059 | 9 | 20315891 | 20315950 | 125219 | chr9:020315891-020315950 | 1.61549  | 1.604783 | -0.29133  | 0.47975785   |
| A_16_P02074082 | 9 | 20330625 | 20330684 | 220963 | chr9:020330625-020330684 | 1.736243 | 1.710267 | -0.110688 | 0.62274194   |
| A_14_P116482   | 9 | 20336094 | 20336153 | 119225 | MLLT3                    | 1.532257 | 1.559629 | -0.058571 | 0.51150185   |
| A_16_P18574503 | 9 | 20344847 | 20344906 | 137085 | MLLT3                    | 0.934209 | 1.023436 | -0.831778 | -0.20730722  |
| A_16_P18574541 | 9 | 20355615 | 20355674 | 76301  | MLLT3                    | 0.929374 | 1.082923 | -0.736835 | -0.21754444  |
| A_16_P18574576 | 9 | 20368553 | 20368612 | 206255 | MLLT3                    | 0.868818 | 0.89284  | -1.239477 | -0.44629037  |
| A_16_P18574600 | 9 | 20375331 | 20375390 | 50662  | MLLT3                    | 1.013267 | 1.041198 | -0.721603 | -0.23501533  |
| A_16_P18574616 | 9 | 20380635 | 20380694 | 59561  | MLLT3                    | 0.914799 | 0.910675 | -0.731965 | -0.14843741  |
| A_16_P18574644 | 9 | 20389192 | 20389251 | 60738  | MLLT3                    | 1.135518 | 1.193218 | -0.613787 | -0.03790261  |
| A_16_P18574667 | 9 | 20397053 | 20397112 | 186411 | MLLT3                    | 1.045165 | 1.199058 | -0.436169 | -0.04458995  |
| A_16_P02074234 | 9 | 20403689 | 20403748 | 201779 | MLLT3                    | 1.32464  | 1.430898 | -0.502533 | 0.3390351    |
| A_16_P38671947 | 9 | 20412504 | 20412563 | 193723 | MLLT3                    | 1.366712 | 1.351252 | -0.438075 | 0.13574612   |
| A_16_P38671976 | 9 | 20426175 | 20426234 | 154162 | MLLT3                    | 1.279938 | 1.239501 | -0.725773 | -0.18745747  |
| A_16_P02074283 | 9 | 20431890 | 20431949 | 89826  | MLLT3                    | 0.914206 | 1.15413  | -0.724434 | -0.29920685  |
| A_16_P18574791 | 9 | 20437302 | 20437361 | 224646 | MLLT3                    | 1.391279 | 1.404934 | -0.268446 | 0.29543567   |
| A_14_P126758   | 9 | 20446703 | 20446762 | 142545 | MLLT3                    | 1.121315 | 1.202226 | -0.556634 | 0.065847576  |
| A_16_P38672099 | 9 | 20460847 | 20460906 | 121421 | MLLT3                    | 1.070179 | 1.132344 | -0.635971 | -0.09286156  |
| A_16_P02074356 | 9 | 20467426 | 20467485 | 189269 | MLLT3                    | 1.235694 | 1.371717 | -0.53028  | 0.0204961    |
| A_16_P38672158 | 9 | 20477253 | 20477312 | 61630  | MLLT3                    | 1.300887 | 1.207524 | -0.708826 | 0.058502734  |
| A_16_P18574951 | 9 | 20484667 | 20484726 | 88790  | MLLT3                    | 0.642762 | 0.590072 | -1.094466 | -0.56346756  |
| A_16_P18574990 | 9 | 20499690 | 20499749 | 203019 | MLLT3                    | 1.142066 | 1.350822 | -0.410918 | 0.048344985  |
| A_16_P18574990 | 9 | 20499690 | 20499749 | 210389 | MLLT3                    | 1.195545 | 1.229347 | -0.366013 | 0.22119483   |
| A_16_P18574990 | 9 | 20499690 | 20499749 | 137084 | MLLT3                    | 1.120401 | 1.193357 | -0.514584 | 0.109004326  |
| A_14_P111169   | 9 | 20510469 | 20510528 | 89776  | MLLT3                    | 1.06789  | 1.144135 | -0.686881 | -0.025756955 |
| A_16_P38672255 | 9 | 20517084 | 20517143 | 50770  | MLLT3                    | 1.12089  | 1.276636 | -0.761071 | -0.20421886  |
| A_16_P38672276 | 9 | 20524440 | 20524499 | 228298 | MLLT3                    | 0.886919 | 1.110477 | -0.794677 | -0.2120423   |
| A_16_P02074465 | 9 | 20538249 | 20538308 | 95954  | MLLT3                    | 1.248722 | 1.312708 | -0.519128 | 0.18512537   |
| A_16_P02074485 | 9 | 20548744 | 20548803 | 76484  | MLLT3                    | 0.609201 | 0.789896 | -1.259081 | -0.73139846  |
| A_16_P18575125 | 9 | 20555549 | 20555608 | 132842 | MLLT3                    | 1.127953 | 1.285045 | -0.657348 | -0.032426447 |
| A_16_P18575142 | 9 | 20560760 | 20560819 | 166580 | MLLT3                    | 1.204507 | 0.87701  | -0.488841 | 0.07211469   |
| A_16_P18575150 | 9 | 20567062 | 20567121 | 209000 | MLLT3                    | 1.138282 | 1.260123 | -0.643089 | -0.10237238  |
| A_16_P02074528 | 9 | 20576632 | 20576691 | 31874  | MLLT3                    | 1.532906 | 1.631956 | -0.125849 | 0.30825055   |
| A_16_P38672414 | 9 | 20582077 | 20582136 | 30153  | MLLT3                    | 1.404189 | 1.630823 | -0.213726 | 0.43560302   |
| A_16_P02074545 | 9 | 20589560 | 20589619 | 142952 | MLLT3                    | 1.282329 | 1.38246  | -0.261736 | 0.3905457    |
| A_16_P18575216 | 9 | 20595923 | 20595982 | 197197 | MLLT3                    | 0.956727 | 0.928113 | -0.778899 | -0.1093303   |
| A_14_P108723   | 9 | 20607752 | 20607811 | 45370  | MLLT3                    | 0.883787 | 1.088523 | -0.575319 | -0.15850797  |
| A_16_P18575288 | 9 | 20617643 | 20617702 | 59157  | chr9:020617643-020617702 | 0.87515  | 1.027278 | -0.825692 | -0.42087585  |
| A_16_P02074616 | 9 | 20626167 | 20626226 | 182279 | chr9:020626167-020626226 | 1.465675 | 1.515083 | -0.134431 | 0.2826069    |
| A_16_P02074624 | 9 | 20632374 | 20632433 | 219139 | chr9:020632374-020632433 | 1.638272 | 1.688089 | 0.031063  | 0.6004497    |
| A_14_P125380   | 9 | 20640349 | 20640408 | 38963  | chr9:020640349-020640408 | 1.508515 | 1.498886 | -0.072703 | 0.46100697   |
| A_16_P02074643 | 9 | 20653398 | 20653457 | 8264   | KIAA1797                 | 1.416634 | 1.501327 | -0.043811 | 0.47712275   |
| A_16_P18575383 | 9 | 20661715 | 20661774 | 139192 | KIAA1797                 | 1.118733 | 1.189006 | -0.505241 | -0.10310978  |
| A_16_P18575402 | 9 | 20669665 | 20669724 | 227641 | KIAA1797                 | 1.0661   | 1.251526 | -0.571843 | -0.010337576 |
| A_16_P18575428 | 9 | 20677769 | 20677828 | 240886 | KIAA1797                 | 1.067447 | 1.250672 | -0.666254 | 0.21360604   |
| A_14_P113345   | 9 | 20684462 | 20684521 | 148233 | KIAA1797                 | 0.884145 | 1.12371  | -0.724512 | -0.13963434  |
| A_16_P38672684 | 9 | 20688242 | 20688301 | 28605  | KIAA1797                 | 1.412961 | 1.535297 | -0.133108 | 0.39176625   |
| A_16_P02074700 | 9 | 20691786 | 20691845 | 192472 | KIAA1797                 | 0.988864 | 1.07246  | -0.943102 | -0.42941803  |
| A_16_P38672704 | 9 | 20694720 | 20694779 | 120670 | KIAA1797                 | 1.051955 | 1.00308  | -0.900316 | -0.5969475   |
| A_16_P38672717 | 9 | 20699329 | 20699388 | 184395 | KIAA1797                 | 1.048898 | 1.184685 | -0.799888 | -0.19047108  |
| A_16_P02074722 | 9 | 20705351 | 20705410 | 106066 | KIAA1797                 | 0.972475 | 0.960176 | -0.614209 | -0.12795657  |
| A_16_P18575502 | 9 | 20707840 | 20707899 | 201479 | KIAA1797                 | 1.10569  | 1.246942 | -0.749313 | -0.095431    |
| A_16_P38672751 | 9 | 20710169 | 20710228 | 19242  | KIAA1797                 | 1.47073  | 1.552881 | -0.356263 | 0.33757436   |
| A_16_P18575518 | 9 | 20712951 | 20713010 | 126    | KIAA1797                 | 0.591733 | 0.475548 | -1.084565 | -0.9839622   |
| A_16_P02074743 | 9 | 20715601 | 20715660 | 94626  | KIAA1797                 | 1.640849 | 1.793174 | 0.100321  | 0.59635293   |
| A_16_P38672779 | 9 | 20718837 | 20718896 | 74633  | KIAA1797                 | 1.487009 | 1.564107 | 0.014619  | 0.5216461    |
| A_16_P18575546 | 9 | 20723152 | 20723211 | 161711 | KIAA1797                 | 0.596184 | 0.832702 | -1.215707 | -0.56140846  |
| A_16_P38672794 | 9 | 20726049 | 20726108 | 115876 | KIAA1797                 | 0.747251 | 1.024178 | -1.05721  | -0.5029546   |
| A_16_P18575563 | 9 | 20729126 | 20729185 | 86122  | KIAA1797                 | 1.347331 | 1.548976 | -0.038047 | 0.5305647    |
| A_16_P02074776 | 9 | 20734048 | 20734107 | 52272  | KIAA1797                 | 1.525743 | 1.736989 | 0.00372   | 0.42992395   |
| A_16_P18575596 | 9 | 20739288 | 20739347 | 90986  | KIAA1797                 | 0.933963 | 1.034991 | -0.863794 | -0.4855067   |
| A_16_P18575615 | 9 | 20748052 | 20748111 | 9892   | KIAA1797                 | 1.016529 | 1.067315 | -0.661295 | -0.13955858  |

|                |   |          |          |        |                          |          |          |           |              |
|----------------|---|----------|----------|--------|--------------------------|----------|----------|-----------|--------------|
| A_16_P02074808 | 9 | 20754842 | 20754901 | 131812 | KIAA1797                 | 1.591165 | 1.581415 | -0.206704 | 0.35128635   |
| A_16_P18575651 | 9 | 20763148 | 20763207 | 138315 | KIAA1797                 | 0.837431 | 0.922275 | -0.994616 | -0.46054304  |
| A_14_P116892   | 9 | 20768714 | 20768773 | 54583  | KIAA1797                 | 0.469149 | 0.497331 | -0.797784 | -0.5883553   |
| A_16_P38672960 | 9 | 20783497 | 20783556 | 44509  | KIAA1797                 | 0.915594 | 1.014847 | -0.994717 | -0.42009056  |
| A_16_P02074881 | 9 | 20798129 | 20798188 | 69398  | KIAA1797                 | 1.534636 | 1.679181 | -0.062091 | 0.4678895    |
| A_14_P113538   | 9 | 20810273 | 20810332 | 918    | KIAA1797                 | 1.214392 | 1.20651  | -0.956676 | 0.027853593  |
| A_16_P18575807 | 9 | 20823666 | 20823725 | 214340 | KIAA1797                 | 1.279301 | 1.483308 | -0.333849 | 0.30166695   |
| A_16_P18575821 | 9 | 20829579 | 20829638 | 89719  | KIAA1797                 | 0.947962 | 0.99972  | -0.465535 | 0.0831605    |
| A_16_P02074936 | 9 | 20836666 | 20836725 | 11482  | KIAA1797                 | 1.557349 | 1.582285 | -0.140099 | 0.465466     |
| A_16_P02074946 | 9 | 20843789 | 20843848 | 124200 | KIAA1797                 | 1.186374 | 1.253676 | -0.408813 | 0.19330247   |
| A_16_P02074955 | 9 | 20852647 | 20852706 | 61835  | KIAA1797                 | 0.76346  | 0.81609  | -1.199793 | -0.3475839   |
| A_16_P18575886 | 9 | 20859484 | 20859543 | 90417  | KIAA1797                 | 1.07282  | 1.193998 | -0.565674 | -0.13145721  |
| A_14_P115355   | 9 | 20864659 | 20864718 | 86558  | KIAA1797                 | 0.895209 | 1.044008 | -0.84837  | -0.28339434  |
| A_16_P38673159 | 9 | 20871870 | 20871926 | 236666 | KIAA1797                 | 0.838024 | 0.653432 | -1.406186 | -0.6285058   |
| A_16_P18575935 | 9 | 20883453 | 20883512 | 17743  | KIAA1797                 | 0.791196 | 0.765848 | -1.093099 | -0.47777104  |
| A_16_P18575947 | 9 | 20892540 | 20892599 | 79657  | KIAA1797                 | 1.216969 | 1.191244 | -0.636155 | 0.002112284  |
| A_16_P38673235 | 9 | 20906836 | 20906895 | 185658 | KIAA1797                 | 1.188901 | 1.179972 | -0.853411 | -0.124509424 |
| A_16_P18576005 | 9 | 20913769 | 20913828 | 187855 | KIAA1797                 | 1.293191 | 1.346713 | -0.402363 | 0.09873293   |
| A_16_P18576032 | 9 | 20922979 | 20923038 | 100568 | KIAA1797                 | 1.170541 | 1.164845 | -0.592396 | -0.06363633  |
| A_16_P02075081 | 9 | 20936612 | 20936671 | 159689 | KIAA1797                 | 1.352278 | 1.294812 | -0.487033 | 0.20786816   |
| A_14_P132615   | 9 | 20943032 | 20943091 | 33923  | KIAA1797                 | 0.51606  | 0.51887  | -1.088567 | -0.63423467  |
| A_16_P18576117 | 9 | 20954440 | 20954499 | 187532 | KIAA1797                 | 1.323769 | 1.454836 | -0.345546 | 0.38722262   |
| A_16_P38673378 | 9 | 20961336 | 20961395 | 10541  | KIAA1797                 | 0.983326 | 1.030336 | -0.609264 | -0.05362931  |
| A_16_P18576138 | 9 | 20967887 | 20967946 | 42760  | KIAA1797                 | 1.127519 | 1.118215 | -0.882862 | -0.31512523  |
| A_16_P38673425 | 9 | 20978259 | 20978318 | 153590 | KIAA1797                 | 1.170042 | 1.263056 | -0.681591 | -0.014869988 |
| A_16_P38673449 | 9 | 20983329 | 20983388 | 63000  | KIAA1797                 | 1.890491 | 1.948273 | 0.522986  | 0.73022914   |
| A_14_P106161   | 9 | 20992866 | 20992925 | 243000 | BC114215                 | 0.446661 | 0.393435 | -1.548568 | -0.97551084  |
| A_16_P38673493 | 9 | 20998145 | 20998204 | 235583 | PTPLAD2                  | 1.363859 | 1.345564 | -0.490709 | 0.08697092   |
| A_16_P02075190 | 9 | 21008062 | 21008121 | 178969 | PTPLAD2                  | 1.136658 | 1.248621 | -0.573371 | -0.02258335  |
| A_16_P38673538 | 9 | 21014358 | 21014417 | 11899  | PTPLAD2                  | 1.007373 | 1.012911 | -0.790764 | -0.16072851  |
| A_16_P02075208 | 9 | 21019271 | 21019330 | 60202  | PTPLAD2                  | 0.912019 | 0.94137  | -1.010902 | -0.23930225  |
| A_16_P02075223 | 9 | 21026673 | 21026732 | 58750  | chr9:021026673-021026732 | 1.520047 | 1.573711 | -0.110441 | 0.57337844   |
| A_16_P18576334 | 9 | 21036758 | 21036817 | 41056  | chr9:021036758-021036817 | 1.541655 | 1.418859 | -0.319546 | 0.3383621    |
| A_16_P18576354 | 9 | 21044957 | 21045016 | 223163 | chr9:021044957-021045016 | 1.522575 | 1.408334 | -0.385073 | 0.31775895   |
| A_16_P02075267 | 9 | 21055167 | 21055226 | 172746 | chr9:021055167-021055226 | 0.927216 | 0.884012 | -1.077626 | -0.3668434   |
| A_14_P124911   | 9 | 21067574 | 21067633 | 52386  | IFNB1                    | 1.220473 | 1.10016  | -0.696969 | -0.19829091  |
| A_16_P18576437 | 9 | 21072470 | 21072529 | 66444  | chr9:021072470-021072529 | 1.170784 | 1.21706  | -0.631112 | -0.026390016 |
| A_16_P38673724 | 9 | 21083730 | 21083789 | 138538 | chr9:021083730-021083789 | 1.048406 | 1.0235   | -0.78881  | -0.06133175  |
| A_14_P102024   | 9 | 21095075 | 21095134 | 235108 | chr9:021095075-021095134 | 0.469369 | 0.45564  | -0.688238 | -0.4210958   |
| A_16_P18576490 | 9 | 21106004 | 21106063 | 196808 | chr9:021106004-021106063 | 0.720218 | 0.700029 | -1.325105 | -0.43824935  |
| A_16_P18576505 | 9 | 21114816 | 21114875 | 189734 | chr9:021114816-021114875 | 0.684547 | 0.691761 | -1.233083 | -0.8534305   |
| A_16_P02075344 | 9 | 21123314 | 21123373 | 14389  | chr9:021123314-021123373 | 1.51785  | 1.480906 | -0.340271 | 0.5057061    |
| A_14_P129669   | 9 | 21130864 | 21130923 | 74894  | IFNW1                    | 1.14296  | 1.175382 | -0.487809 | 0.005260468  |
| A_14_P131521   | 9 | 21131868 | 21131927 | 108702 | IFNW1                    | 0.305651 | 0.390731 | -1.617105 | -0.7595174   |
| A_16_P02075362 | 9 | 21135206 | 21135265 | 169965 | chr9:021135206-021135265 | 1.298087 | 1.222305 | -0.586056 | 0.14393406   |
| A_16_P38673845 | 9 | 21140819 | 21140878 | 85135  | chr9:021140819-021140878 | 1.539137 | 1.517804 | -0.518761 | 0.12095327   |
| A_16_P18576575 | 9 | 21149331 | 21149390 | 54502  | chr9:021149331-021149390 | 0.630381 | 1.174096 | -0.468162 | -0.34648895  |
| A_14_P136897   | 9 | 21154498 | 21154557 | 183346 | chr9:021154498-021154557 | 1.186028 | 1.290164 | -0.615655 | -0.021104217 |
| A_16_P38673886 | 9 | 21158189 | 21158248 | 29479  | chr9:021158189-021158248 | 0.959994 | 1.045484 | -0.94212  | -0.38815928  |
| A_16_P38673894 | 9 | 21164435 | 21164494 | 107048 | chr9:021164435-021164494 | 1.07097  | 1.098808 | -0.789589 | -0.08641276  |
| A_14_P105962   | 9 | 21168022 | 21168081 | 78682  | chr9:021168022-021168081 | 0.833662 | 0.957901 | -0.986198 | -0.36640185  |
| A_16_P18576616 | 9 | 21169241 | 21169288 | 40017  | chr9:021169241-021169288 | 0.325125 | 0.710876 | -1.157068 | -0.7634556   |
| A_16_P02075399 | 9 | 21179604 | 21179663 | 136410 | chr9:021179604-021179663 | 0.733674 | 0.800057 | -1.337937 | -0.5564321   |
| A_16_P38673935 | 9 | 21186354 | 21186413 | 43812  | chr9:021186354-021186413 | 1.072229 | 1.211017 | -1.109269 | -0.13023788  |
| A_16_P02075405 | 9 | 21193565 | 21193614 | 128680 | IFNA14                   | 0.836589 | 1.084577 | -1.044271 | -0.5006732   |
| A_16_P38673975 | 9 | 21203769 | 21203817 | 41394  | IFNA14                   | 1.50567  | 1.492806 | -0.179174 | 0.6075738    |
| A_16_P18576697 | 9 | 21208548 | 21208606 | 172042 | IFNA14                   | 0.834509 | 1.427918 | -1.557225 | -0.28727004  |
| A_16_P38674029 | 9 | 21228628 | 21228687 | 48864  | IFNA14                   | 0.797673 | 0.894044 | -1.318663 | -0.5044038   |
| A_14_P104628   | 9 | 21231471 | 21231530 | 159594 | chr9:021231471-021231530 | 0.619321 | 0.492492 | -1.350125 | -0.861588    |
| A_16_P38674062 | 9 | 21242517 | 21242576 | 206007 | chr9:021242517-021242576 | 1.642461 | 1.499618 | -0.118074 | 0.5057963    |
| A_16_P38674075 | 9 | 21252184 | 21252243 | 16321  | chr9:021252184-021252243 | 1.464343 | 1.475224 | -0.292055 | 0.30409253   |
| A_16_P18576815 | 9 | 21271976 | 21272035 | 50824  | chr9:021271976-021272035 | 1.360332 | 1.346509 | -0.355375 | 0.005425856  |
| A_16_P18576831 | 9 | 21282858 | 21282917 | 79851  | chr9:021282858-021282917 | 1.358482 | 1.34305  | -0.458189 | 0.09963043   |
| A_14_P116804   | 9 | 21294530 | 21294589 | 160785 | V00541                   | 0.663526 | 0.537016 | -1.36089  | -1.0028336   |
| A_16_P18576864 | 9 | 21299118 | 21299177 | 145956 | chr9:021299118-021299177 | 0.71746  | 0.719967 | -1.208142 | -0.56349933  |
| A_16_P02075498 | 9 | 21302633 | 21302692 | 13794  | chr9:021302633-021302692 | 1.423231 | 1.620077 | -1.151283 | 0.36348557   |
| A_16_P02075502 | 9 | 21306601 | 21306660 | 50304  | chr9:021306601-021306660 | 1.496145 | 1.334987 | -0.395336 | 0.39351004   |
| A_16_P18576901 | 9 | 21313778 | 21313837 | 28577  | chr9:021313778-021313837 | 1.420143 | 1.60233  | -0.235077 | 0.4804582    |
| A_14_P139584   | 9 | 21321182 | 21321241 | 156169 | KLHL9                    | 0.582318 | 0.317426 | -1.435071 | -0.7692478   |
| A_16_P02075542 | 9 | 21324395 | 21324454 | 33104  | KLHL9                    | 0.789514 | 0.874259 | -1.11488  | -0.5394635   |
| A_16_P18576962 | 9 | 21331663 | 21331722 | 10538  | chr9:021331663-021331722 | 1.765    | 1.714675 | 0.082333  | 0.70670146   |
| A_14_P105274   | 9 | 21337678 | 21337737 | 1822   | chr9:021337678-021337737 | 1.255645 | 1.498552 | -0.269395 | 0.22194779   |
| A_16_P18576977 | 9 | 21342256 | 21342315 | 35692  | chr9:021342256-021342315 | 1.182139 | 1.263945 | -0.496353 | 0.026389569  |



|                |   |          |          |        |                          |          |          |           |              |
|----------------|---|----------|----------|--------|--------------------------|----------|----------|-----------|--------------|
| A_16_P02075569 | 9 | 21346919 | 21346978 | 200670 | chr9:021346919-021346978 | 1.140173 | 1.189365 | -0.535533 | -0.047427908 |
| A_16_P02075576 | 9 | 21350172 | 21350231 | 77927  | chr9:021350172-021350231 | 1.433287 | 1.524614 | -0.096122 | 0.477035558  |
| A_16_P18577008 | 9 | 21353140 | 21353199 | 175848 | chr9:021353140-021353199 | 0.907244 | 1.00855  | -1.108763 | -0.6386602   |
| A_16_P38674325 | 9 | 21355845 | 21355904 | 169184 | chr9:021355845-021355904 | 0.658778 | 0.725543 | -1.390063 | -0.5386405   |
| A_16_P38674335 | 9 | 21359384 | 21359443 | 175665 | chr9:021359384-021359443 | 1.231474 | 1.312167 | -0.373571 | 0.05211465   |
| A_14_P127147   | 9 | 21362177 | 21362236 | 173561 | chr9:021362177-021362236 | 1.328658 | 1.308492 | -0.346322 | 0.08055077   |
| A_16_P02075591 | 9 | 21366120 | 21366179 | 109506 | chr9:021366120-021366179 | 1.5823   | 1.445469 | -0.293255 | 0.2717575    |
| A_16_P18577039 | 9 | 21371392 | 21371451 | 90950  | chr9:021371392-021371451 | 1.237364 | 1.275681 | -0.62914  | 0.08539259   |
| A_14_P104948   | 9 | 21374383 | 21374442 | 143503 | IFNA2                    | 0.287858 | 0.419303 | -1.34999  | -0.7139344   |
| A_16_P18577061 | 9 | 21381062 | 21381121 | 176460 | chr9:021381062-021381121 | 1.503994 | 1.426285 | -0.24636  | 0.41413102   |
| A_16_P38674395 | 9 | 21386491 | 21386550 | 57699  | chr9:021386491-021386550 | 1.305626 | 1.326781 | -0.717476 | 0.09478289   |
| A_16_P18577089 | 9 | 21389354 | 21389413 | 68128  | chr9:021389354-021389413 | 1.887132 | 1.985867 | 0.151387  | 0.486799     |
| A_16_P02075631 | 9 | 21394289 | 21394347 | 162550 | chr9:021394289-021394347 | 1.294714 | 1.385747 | -0.504467 | 0.18854006   |
| A_14_P109107   | 9 | 21399800 | 21399850 | 195080 | IFNA8                    | 0.988048 | 1.185167 | -0.796507 | -0.25665298  |
| A_16_P38674451 | 9 | 21404411 | 21404470 | 11172  | chr9:021404411-021404470 | 1.935687 | 1.709736 | -0.079783 | 0.52433586   |
| A_16_P38674468 | 9 | 21408944 | 21409003 | 142326 | chr9:021408944-021409003 | 1.149384 | 1.295917 | -0.841049 | -0.18752888  |
| A_16_P38674480 | 9 | 21418595 | 21418654 | 203751 | chr9:021418595-021418654 | 1.525488 | 1.573985 | 0.009097  | 0.47121853   |
| A_16_P18577175 | 9 | 21424756 | 21424815 | 140380 | chr9:021424756-021424815 | 0.887936 | 1.007966 | -0.028392 | -0.39738154  |
| A_14_P105901   | 9 | 21431614 | 21431673 | 227371 | chr9:021431614-021431673 | 1.335001 | 1.366936 | -0.423515 | 0.23721053   |
| A_16_P02075693 | 9 | 21438637 | 21438696 | 54385  | chr9:021438637-021438696 | 0.9028   | 1.312587 | -0.566029 | 0.004916385  |
| A_16_P18577228 | 9 | 21444717 | 21444776 | 185619 | AK124391                 | 1.38352  | 1.622281 | -0.260703 | 0.30624247   |
| A_16_P18577241 | 9 | 21452458 | 21452517 | 74069  | AK124391                 | 0.916177 | 1.099967 | -0.854702 | -0.082903326 |
| A_16_P18577258 | 9 | 21460816 | 21460875 | 179682 | AK124391                 | 1.483101 | 1.628193 | 0.011567  | 0.434945     |
| A_16_P18577258 | 9 | 21460816 | 21460875 | 116050 | AK124391                 | 1.446856 | 1.569378 | -0.207233 | 0.42543146   |
| A_16_P18577258 | 9 | 21460816 | 21460875 | 33067  | AK124391                 | 1.520555 | 1.694413 | -0.057913 | 0.54690444   |
| A_16_P18577279 | 9 | 21466463 | 21466522 | 10065  | AK124391                 | 1.068722 | 0.964473 | -0.868053 | -0.29575202  |
| A_14_P101271   | 9 | 21471540 | 21471599 | 140721 | IFNE1                    | 1.28772  | 1.246328 | -0.191076 | 0.17997047   |
| A_16_P18577304 | 9 | 21473384 | 21473443 | 96066  | AK124391                 | 0.8666   | 1.175203 | -0.769145 | -0.21001306  |
| A_16_P18577304 | 9 | 21481866 | 21481925 | 189659 | AK124391                 | 1.200337 | 1.32775  | -0.548075 | -0.1140033   |
| A_16_P18577318 | 9 | 21487001 | 21487060 | 32210  | AK124391                 | 1.087383 | 1.167539 | -0.727993 | -0.109166086 |
| A_16_P18577330 | 9 | 21490692 | 21490751 | 207274 | AK124391                 | 1.663305 | 1.586983 | -0.150725 | 0.40593934   |
| A_16_P18577344 | 9 | 21494568 | 21494627 | 147703 | AK124391                 | 0.876846 | 0.789743 | -0.885468 | -0.40274936  |
| A_16_P18577353 | 9 | 21497516 | 21497575 | 117957 | AK124391                 | 0.829252 | 1.004606 | -0.825349 | -0.23307738  |
| A_16_P18577368 | 9 | 21502385 | 21502444 | 232424 | AK124391                 | 1.413711 | 1.558177 | -0.225742 | 0.31460112   |
| A_16_P18577376 | 9 | 21504931 | 21504990 | 4271   | AK124391                 | 0.784859 | 0.905727 | -0.917207 | -0.3932718   |
| A_16_P02075806 | 9 | 21510354 | 21510413 | 157895 | AK124391                 | 1.060449 | 1.32442  | -0.342604 | 0.2648031    |
| A_16_P38674727 | 9 | 21521275 | 21521334 | 88030  | AK124391                 | 1.560359 | 1.646767 | -0.153631 | 0.50692403   |
| A_16_P18577407 | 9 | 21524780 | 21524839 | 50443  | AK124391                 | 0.940891 | 0.994856 | -0.918129 | -0.17779619  |
| A_14_P113652   | 9 | 21537336 | 21537395 | 37279  | AK124391                 | 1.628056 | 1.675698 | -0.092016 | 0.53603745   |
| A_16_P38674798 | 9 | 21548354 | 21548413 | 181064 | AK124391                 | 1.496275 | 1.68243  | -0.16424  | 0.54850908   |
| A_16_P02075945 | 9 | 21593915 | 21593974 | 20335  | chr9:021593915-021593974 | 1.55819  | 1.601744 | -0.045631 | 0.5378524    |
| A_16_P02076005 | 9 | 21648291 | 21648350 | 38931  | chr9:021648291-021648350 | 1.405743 | 1.624679 | -0.131725 | 0.45384383   |
| A_16_P02076088 | 9 | 21698371 | 21698430 | 32943  | chr9:021698371-021698430 | 1.10649  | 1.361038 | -0.757949 | 0.16944744   |
| A_14_P130737   | 9 | 21733410 | 21733469 | 155028 | chr9:021733410-021733469 | 0.92669  | 1.125312 | -0.768587 | -0.3760172   |
| A_16_P18578009 | 9 | 21753782 | 21753841 | 79014  | chr9:021753782-021753841 | 1.052851 | 1.17262  | -0.727284 | -0.47701347  |
| A_16_P18578048 | 9 | 21771805 | 21771864 | 131333 | chr9:021771805-021771864 | 1.021582 | 1.129545 | -0.541877 | -0.063815564 |
| A_16_P18578078 | 9 | 21780832 | 21780891 | 11680  | chr9:021780832-021780891 | 1.361384 | 1.566058 | -0.362674 | 0.38899708   |
| A_14_P105352   | 9 | 21795270 | 21795329 | 81817  | MTAP                     | 1.252028 | 1.176612 | -0.524595 | 0.007066891  |
| A_16_P18578151 | 9 | 21807082 | 21807141 | 225728 | MTAP                     | 1.913987 | 1.992547 | 0.202677  | 0.8359987    |
| A_16_P18578174 | 9 | 21822728 | 21822787 | 179166 | MTAP                     | 1.186583 | 1.216751 | -0.587047 | 0.26984102   |
| A_16_P18578189 | 9 | 21827873 | 21827932 | 196175 | MTAP                     | 1.143578 | 1.252573 | -0.44744  | -0.06691921  |
| A_14_P117235   | 9 | 21845114 | 21845173 | 226723 | MTAP                     | 0.911398 | 1.145944 | -1.058625 | -0.2889428   |
| A_14_P101143   | 9 | 21853204 | 21853263 | 139181 | MTAP                     | 1.221399 | 1.278964 | -0.581637 | 0.25231558   |
| A_16_P02076324 | 9 | 21862531 | 21862590 | 107197 | AF109294                 | 0.801391 | 0.984393 | -1.033585 | -0.59107363  |
| A_16_P18578257 | 9 | 21875149 | 21875202 | 14622  | AF109294                 | 0.925044 | 1.095435 | 0.010133  | 0.7052583    |
| A_16_P18578265 | 9 | 21892814 | 21892873 | 170246 | AF109294                 | 1.244527 | 1.433802 | -0.309764 | 0.12669125   |
| A_16_P18578276 | 9 | 21899332 | 21899391 | 208598 | AF109294                 | 1.330301 | 1.407438 | -0.295768 | 0.167758     |
| A_16_P18578279 | 9 | 21904800 | 21904859 | 228947 | AF109294                 | 0.559024 | 0.635181 | -1.187388 | -0.55805993  |
| A_16_P02076341 | 9 | 21910518 | 21910577 | 55567  | AF109294                 | 1.406475 | 1.480663 | -0.203948 | 0.23244064   |
| A_16_P02076345 | 9 | 21919810 | 21919869 | 142498 | AF109294                 | 0.984911 | 1.002525 | -0.859133 | -0.10386178  |
| A_16_P18578298 | 9 | 21926007 | 21926066 | 64899  | AF109294                 | 1.225889 | 1.337505 | -0.434071 | 0.16544199   |
| A_16_P02076353 | 9 | 21934037 | 21934096 | 221211 | AF109294                 | 1.744342 | 1.822871 | -0.089695 | 0.6855309    |
| A_16_P18578320 | 9 | 21947735 | 21947794 | 51857  | AF109294                 | 1.251684 | 1.282633 | -0.565258 | 0.087601885  |
| A_14_P121053   | 9 | 21957548 | 21957607 | 53218  | AF109294                 | 1.871388 | 2.013422 | 0.415387  | 0.89693993   |
| A_14_P129522   | 9 | 21958041 | 21958099 | 166469 | CDKN2A                   | 0.992854 | 1.125023 | -0.575389 | -0.046952263 |
| A_14_P130650   | 9 | 21968346 | 21968405 | 98225  | CDKN2A                   | 1.486594 | 1.558724 | -0.164585 | -0.33456296  |
| A_16_P18578387 | 9 | 21973069 | 21973128 | 167496 | CDKN2A                   | 1.354507 | 1.43987  | -0.21779  | 0.31066737   |
| A_14_P112983   | 9 | 21980522 | 21980581 | 164129 | CDKN2A                   | 1.366919 | 1.659734 | -0.283353 | 0.2789217    |
| A_16_P18578423 | 9 | 21983401 | 21983460 | 154616 | CDKN2A                   | 1.463486 | 1.580823 | -0.165361 | 0.56696737   |
| A_14_P102897   | 9 | 21993651 | 21993710 | 41688  | CDKN2B                   | 0.823237 | 1.218018 | -0.678238 | -0.096924454 |
| A_14_P103496   | 9 | 21998167 | 21998226 | 2164   | CDKN2B                   | 0.839548 | 0.939343 | -0.979809 | -0.5278842   |
| A_14_P127768   | 9 | 21998596 | 21998655 | 167037 | CDKN2B                   | 0.961164 | 0.955131 | -1.18707  | -0.69336945  |
| A_14_P118440   | 9 | 21998982 | 21999029 | 90565  | CDKN2B                   | 1.544698 | 1.768024 | -0.014481 | 0.75411177   |

|                |   |          |          |        |                          |          |          |           |              |
|----------------|---|----------|----------|--------|--------------------------|----------|----------|-----------|--------------|
| A_16_P38675850 | 9 | 22007835 | 22007894 | 85868  | AF109294                 | 1.239573 | 1.477866 | -0.33057  | 0.3114243    |
| A_16_P18578506 | 9 | 22018273 | 22018332 | 58347  | AF109294                 | 0.550478 | 0.625105 | -1.461136 | -0.6127848   |
| A_16_P18578532 | 9 | 22026446 | 22026505 | 237355 | chr9:022026446-022026505 | 1.094801 | 1.260512 | -0.423865 | 0.05503477   |
| A_16_P18578581 | 9 | 22042080 | 22042139 | 84886  | chr9:022042080-022042139 | 1.178645 | 1.124046 | -0.654935 | -0.046027347 |
| A_16_P18578628 | 9 | 22059983 | 22060042 | 227347 | chr9:022059983-022060042 | 1.032359 | 1.280241 | -1.023227 | 0.11747194   |
| A_16_P18578677 | 9 | 22076798 | 22076857 | 140195 | chr9:022076798-022076857 | 1.373026 | 1.140541 | -0.305371 | 0.2675796    |
| A_16_P18578763 | 9 | 22115405 | 22115464 | 26303  | chr9:022115405-022115464 | 1.276593 | 1.456107 | -0.202493 | 0.33506888   |
| A_14_P106813   | 9 | 22136626 | 22136685 | 212373 | chr9:022136626-022136685 | 1.141754 | 1.336823 | -0.549487 | -0.006724373 |
| A_16_P02076722 | 9 | 22166172 | 22166231 | 47105  | chr9:022166172-022166231 | 0.919318 | 1.178812 | -0.763443 | -0.3335235   |
| A_16_P02076730 | 9 | 22183169 | 22183228 | 58324  | chr9:022183169-022183228 | 1.179284 | 1.310522 | -0.509576 | 0.18875033   |
| A_16_P18578963 | 9 | 22202553 | 22202612 | 38751  | chr9:02202553-02202612   | 0.834918 | 0.899141 | -0.908905 | -0.51009923  |
| A_16_P02076790 | 9 | 22236765 | 22236824 | 35623  | chr9:022236765-022236824 | 1.288888 | 1.406447 | -0.485568 | 0.12708464   |
| A_16_P18579067 | 9 | 22271686 | 22271745 | 19312  | chr9:022271686-022271745 | 1.057201 | 1.194863 | -0.978268 | -0.16878718  |
| A_16_P18579111 | 9 | 22292223 | 22292282 | 77492  | chr9:022292223-02292282  | 1.171063 | 1.341107 | -0.429469 | 0.008970201  |
| A_14_P113515   | 9 | 22316165 | 22316224 | 29476  | chr9:022316165-022316224 | 1.169365 | 1.160325 | -0.741518 | -0.17615032  |
| A_16_P18579230 | 9 | 22346407 | 22346466 | 207951 | chr9:022346407-022346466 | 1.136822 | 1.070002 | -0.610385 | -0.085805535 |
| A_16_P18579289 | 9 | 22372290 | 22372349 | 229312 | chr9:022372290-022372349 | 0.983358 | 1.143976 | -0.591168 | -0.062746376 |
| A_16_P18579370 | 9 | 22406549 | 22406608 | 179402 | chr9:022406549-022406608 | 1.296065 | 1.409131 | -0.931129 | 0.06578533   |
| A_16_P38676769 | 9 | 22421085 | 22421144 | 99139  | chr9:022421085-022421144 | 1.030264 | 1.17963  | -0.71805  | -0.12909985  |
| A_16_P38676777 | 9 | 22434682 | 22434741 | 133030 | chr9:022434682-022434741 | 0.899697 | 1.059022 | -1.170077 | -0.42327732  |
| A_16_P02077035 | 9 | 22441145 | 22441204 | 115530 | DMRTA1                   | 0.974835 | 0.92294  | -0.989673 | -0.4264871   |
| A_16_P38676819 | 9 | 22445002 | 22445061 | 20100  | chr9:022445002-022445061 | 1.306827 | 1.371194 | -0.478092 | 0.2582391    |
| A_16_P18579463 | 9 | 22453166 | 22453225 | 80343  | chr9:022453166-022453225 | 0.852747 | 0.863858 | -1.045642 | -0.43401974  |
| A_16_P02077061 | 9 | 22462725 | 22462784 | 128919 | chr9:022462725-022462784 | 1.611519 | 1.841171 | 0.064052  | 0.6268177    |
| A_16_P18579511 | 9 | 22477358 | 22477417 | 59861  | chr9:022477358-022477417 | 1.201573 | 1.330421 | -0.471899 | 0.065393     |
| A_16_P18579539 | 9 | 22502565 | 22502624 | 211361 | chr9:022502565-022502624 | 1.451141 | 1.386306 | -0.382357 | 0.299924     |
| A_16_P18579614 | 9 | 22527010 | 22527069 | 28844  | chr9:022527010-022527069 | 1.109299 | 1.07341  | -0.776002 | -0.22622126  |
| A_16_P38677031 | 9 | 22545507 | 22545566 | 51413  | chr9:022545507-022545566 | 1.34796  | 1.327652 | -0.205978 | 0.23904094   |
| A_16_P18579693 | 9 | 22582720 | 22582779 | 43663  | chr9:022582720-022582779 | 0.936819 | 0.89796  | -0.983849 | -0.30384243  |
| A_16_P18579737 | 9 | 22596322 | 22596381 | 143040 | chr9:022596322-022596381 | 0.609798 | 0.568237 | -1.403731 | -0.65710866  |
| A_16_P18579786 | 9 | 22615986 | 22616045 | 27612  | chr9:022615986-022616045 | 0.775671 | 0.695485 | -1.160372 | -0.82399356  |
| A_16_P18579842 | 9 | 22638451 | 22638510 | 91679  | AK092601                 | 1.479933 | 1.436781 | -0.182677 | 0.32800108   |
| A_16_P38677245 | 9 | 22656569 | 22656628 | 128311 | AK092601                 | -5.35318 | 1.313314 | -0.932425 | 0.23024857   |
| A_16_P18579907 | 9 | 22664760 | 22664819 | 55247  | AK092601                 | 1.092128 | 1.158962 | -0.73837  | -0.011796817 |
| A_16_P18579947 | 9 | 22675780 | 22675839 | 178274 | AK092601                 | 0.92096  | 1.245428 | -0.88214  | -0.08730659  |
| A_14_P129139   | 9 | 22690103 | 22690162 | 222573 | AK092601                 | 1.200867 | 1.327974 | -0.480496 | 0.10699223   |
| A_16_P18580025 | 9 | 22712626 | 22712685 | 218173 | AK092601                 | 1.187333 | 1.260867 | -0.679828 | 0.11455043   |
| A_16_P18580046 | 9 | 22723912 | 22723971 | 95115  | AK092601                 | 1.207547 | 1.355789 | -0.41164  | 0.2401636    |
| A_16_P18580098 | 9 | 22745047 | 22745106 | 18673  | AK092601                 | 0.948275 | 1.079468 | -0.513075 | -0.25993404  |
| A_16_P02077445 | 9 | 22755222 | 22755281 | 81329  | AK092601                 | 1.495447 | 1.69527  | -0.046596 | 0.37977752   |
| A_16_P18580133 | 9 | 22768706 | 22768765 | 32111  | AK092601                 | 1.016357 | 1.035317 | -0.731442 | -0.0933885   |
| A_16_P02077471 | 9 | 22787299 | 22787358 | 179934 | AK092601                 | 1.241908 | 1.2485   | -0.538622 | 0.16370821   |
| A_16_P18580176 | 9 | 22797750 | 22797809 | 23958  | AK092601                 | 1.105931 | 1.214989 | -0.78886  | 8.40E-05     |
| A_16_P18580207 | 9 | 22808496 | 22808555 | 87851  | AK092601                 | 1.298628 | 1.307947 | -0.553176 | 0.276152     |
| A_16_P18580255 | 9 | 22842920 | 22842979 | 17179  | chr9:022842920-022842979 | 0.913476 | 1.014887 | -0.944451 | -0.2909526   |
| A_14_P127990   | 9 | 22889584 | 22889643 | 76917  | chr9:022889584-022889643 | 0.504144 | 0.64628  | -1.521658 | -0.7589897   |
| A_16_P38677756 | 9 | 22905506 | 22905565 | 224870 | chr9:022905506-022905565 | 1.018985 | 0.98472  | -1.012972 | -0.20040196  |
| A_16_P38677795 | 9 | 22919521 | 22919580 | 4025   | chr9:022919521-022919580 | 0.970997 | 1.104664 | -0.835052 | -0.06437963  |
| A_16_P18580477 | 9 | 22935656 | 22935715 | 25495  | chr9:022935656-022935715 | 0.833353 | 0.97348  | -0.966684 | -0.20863965  |
| A_16_P18580529 | 9 | 22963881 | 22963940 | 200982 | chr9:022963881-022963940 | 1.317727 | 1.273982 | -0.454721 | 0.2503895    |
| A_14_P116221   | 9 | 22992318 | 22992377 | 207012 | chr9:022992318-022992377 | 0.974751 | 1.285255 | -0.505713 | -0.099313766 |
| A_16_P38678003 | 9 | 23018614 | 23018673 | 177461 | chr9:023018614-023018673 | 0.666599 | 0.758047 | -1.36547  | -0.45258152  |
| A_16_P38678033 | 9 | 23032305 | 23032364 | 184169 | chr9:023032305-023032364 | 1.168136 | 1.013058 | -0.644579 | 0.15310213   |
| A_16_P38678049 | 9 | 23049932 | 23049991 | 105061 | chr9:023049932-023049991 | 1.090736 | 1.273728 | -0.594702 | 0.037073597  |
| A_16_P18580748 | 9 | 23071027 | 23071086 | 227970 | chr9:023071027-023071086 | 1.036747 | 1.078509 | -0.688347 | -0.07012084  |
| A_16_P18580793 | 9 | 23092507 | 23092566 | 34167  | chr9:023092507-023092566 | 1.018688 | 1.080036 | -0.792879 | -0.045655966 |
| A_16_P18580857 | 9 | 23122133 | 23122191 | 69079  | chr9:023122133-023122191 | 1.669796 | 2.103181 | 0.275893  | 0.640507     |
| A_16_P18580895 | 9 | 23146308 | 23146367 | 35675  | chr9:023146308-023146367 | 1.033597 | 1.091081 | -0.683495 | -0.23877797  |
| A_16_P38678279 | 9 | 23167135 | 23167194 | 123489 | chr9:023167135-023167194 | 1.104728 | 1.202548 | -0.73201  | 0.034809023  |
| A_16_P18581034 | 9 | 23203099 | 23203158 | 89832  | chr9:023203099-023203158 | 1.330487 | 1.455315 | -0.359294 | 0.39232633   |
| A_16_P18581084 | 9 | 23222087 | 23222146 | 146181 | chr9:023222087-023222146 | 0.664971 | 0.595946 | -1.222494 | -0.52419364  |
| A_16_P18581128 | 9 | 23247335 | 23247394 | 1653   | chr9:023247335-023247394 | 1.460871 | 1.193971 | -0.382726 | 0.10528782   |
| A_16_P18581209 | 9 | 23278698 | 23278757 | 173943 | chr9:023278698-023278757 | 0.977089 | 1.061659 | -0.994966 | -0.18638891  |
| A_16_P38678683 | 9 | 23316739 | 23316798 | 110917 | chr9:023316739-023316798 | 1.064811 | 0.924575 | -1.004917 | -0.22293577  |
| A_16_P18581362 | 9 | 23338535 | 23338594 | 76921  | chr9:023338535-023338594 | 1.277974 | 1.337335 | -0.682593 | 0.2835158    |
| A_16_P02078191 | 9 | 23365926 | 23365985 | 158112 | chr9:023365926-023365985 | 2.251245 | 2.112431 | -0.689168 | -0.48066407  |
| A_16_P02078229 | 9 | 23405562 | 23405621 | 103499 | chr9:023405562-023405621 | 1.166995 | 1.133963 | -0.842215 | -0.15794244  |
| A_14_P102923   | 9 | 23425976 | 23426035 | 108320 | chr9:023425976-023426035 | 1.404028 | 1.382575 | -0.437178 | 0.38761967   |
| A_16_P02078329 | 9 | 23476450 | 23476509 | 2039   | chr9:023476450-023476509 | 0.597906 | 0.520831 | -1.268202 | -0.9048127   |
| A_16_P18581686 | 9 | 23494118 | 23494177 | 36636  | CR627240                 | 1.073215 | 0.937285 | -0.97273  | -0.36725366  |
| A_16_P02078368 | 9 | 23505762 | 23505821 | 94359  | CR627240                 | 1.18579  | 1.14684  | -0.67964  | -0.033330515 |
| A_16_P18581743 | 9 | 23516657 | 23516716 | 10428  | CR627240                 | 1.522281 | 1.342092 | -0.327186 | 0.23367909   |
| A_16_P38679116 | 9 | 23526542 | 23526601 | 34344  | CR627240                 | 1.148759 | 1.129508 | -0.628196 | -0.16156274  |

|                |   |          |          |        |                          |          |          |           |              |
|----------------|---|----------|----------|--------|--------------------------|----------|----------|-----------|--------------|
| A_16_P18581833 | 9 | 23550029 | 23550088 | 169853 | CR627240                 | 1.540818 | 1.622575 | -0.201787 | 0.4941723    |
| A_16_P02078459 | 9 | 23559089 | 23559148 | 195902 | CR627240                 | 1.308708 | 1.208695 | -0.689661 | -0.1811854   |
| A_16_P02078492 | 9 | 23577355 | 23577414 | 101303 | CR627240                 | 1.475955 | 1.508457 | -0.157507 | 0.4163791    |
| A_16_P02078513 | 9 | 23588116 | 23588175 | 97861  | CR627240                 | 1.186067 | 1.20484  | -0.519119 | -0.03067422  |
| A_16_P38679344 | 9 | 23603549 | 23603608 | 53692  | CR627240                 | 1.435929 | 1.340664 | -0.259519 | 0.27965686   |
| A_16_P18582065 | 9 | 23624959 | 23625018 | 223773 | CR627240                 | 1.910159 | 1.970406 | 0.414834  | 1.0068026    |
| A_16_P18582104 | 9 | 23636699 | 23636758 | 150304 | CR627240                 | 1.239993 | 1.192675 | -0.548341 | 0.36751804   |
| A_14_P128755   | 9 | 23649971 | 23650030 | 13737  | CR627240                 | 1.738218 | 1.70827  | -0.11666  | 0.5552496    |
| A_16_P18582195 | 9 | 23665998 | 23666057 | 87123  | chr9:023665998-023666057 | 1.110377 | 1.173518 | -0.538637 | 0.09389213   |
| A_16_P18582221 | 9 | 23673529 | 23673588 | 185477 | chr9:023673529-023673588 | 1.455467 | 1.374294 | -0.422318 | 0.22739077   |
| A_14_P113744   | 9 | 23680273 | 23680332 | 217350 | ELAVL2                   | 0.942829 | 0.769368 | -0.966315 | -0.3576333   |
| A_16_P02078722 | 9 | 23691567 | 23691626 | 230790 | ELAVL2                   | 1.670141 | 1.51196  | -0.071477 | 0.4360584    |
| A_16_P38679673 | 9 | 23699486 | 23699545 | 89891  | ELAVL2                   | 1.651283 | 1.402226 | -0.076343 | 0.4392668    |
| A_16_P18582331 | 9 | 23704617 | 23704676 | 63836  | ELAVL2                   | 0.793149 | 0.782493 | -0.563065 | -0.09827295  |
| A_14_P101322   | 9 | 23714814 | 23714873 | 202800 | ELAVL2                   | 1.025278 | 1.15631  | -0.221687 | 0.19427475   |
| A_16_P02078788 | 9 | 23721004 | 23721063 | 36150  | ELAVL2                   | 0.518988 | 0.470954 | -1.620893 | -0.99255383  |
| A_16_P02078802 | 9 | 23726783 | 23726842 | 231525 | ELAVL2                   | 1.610704 | 1.561638 | 0.046418  | 0.70217866   |
| A_16_P38679821 | 9 | 23740648 | 23740707 | 88911  | ELAVL2                   | 1.118254 | 0.948288 | -0.647004 | -0.10097289  |
| A_16_P38679859 | 9 | 23751947 | 23752006 | 159294 | ELAVL2                   | 1.003679 | 1.017552 | -0.642732 | -0.03793469  |
| A_16_P38679891 | 9 | 23761266 | 23761325 | 147493 | ELAVL2                   | 0.840532 | 0.612386 | -1.270828 | -0.5197043   |
| A_16_P02078893 | 9 | 23767217 | 23767276 | 36924  | ELAVL2                   | 1.178774 | 1.060381 | -0.805375 | -0.035661772 |
| A_16_P18582559 | 9 | 23773205 | 23773264 | 172117 | ELAVL2                   | 1.047515 | 1.054706 | -0.59467  | -0.15245625  |
| A_14_P106458   | 9 | 23779157 | 23779216 | 72163  | ELAVL2                   | 1.536266 | 1.325139 | 0.128843  | 0.07552722   |
| A_16_P18582596 | 9 | 23784955 | 23785014 | 19909  | ELAVL2                   | 0.253208 | 0.239093 | -1.813177 | -1.2136819   |
| A_16_P02078946 | 9 | 23793345 | 23793404 | 70741  | ELAVL2                   | 1.113033 | 0.938927 | -0.969332 | -0.27927747  |
| A_16_P18582649 | 9 | 23800056 | 23800115 | 129454 | ELAVL2                   | 1.31321  | 1.121434 | -0.506822 | -0.003029078 |
| A_16_P18582677 | 9 | 23807986 | 23808045 | 142967 | ELAVL2                   | 1.082078 | 1.086236 | -0.690749 | -0.17026734  |
| A_14_P116494   | 9 | 23816193 | 23816243 | 183937 | U12431                   | 1.137755 | 0.992857 | -0.031691 | 0.20114475   |
| A_16_P18582752 | 9 | 23829468 | 23829527 | 166029 | chr9:023829468-023829527 | 1.370947 | 1.484503 | -0.240471 | 0.3474247    |
| A_14_P201280   | 9 | 23843392 | 23843451 | 97634  | chr9:023843392-023843451 | 0.940485 | 1.022898 | -0.55085  | 0.15378228   |
| A_16_P18582822 | 9 | 23857943 | 23858002 | 164848 | chr9:023857943-023858002 | 1.133989 | 1.061683 | -0.761361 | -0.10233587  |
| A_16_P02079117 | 9 | 23901804 | 23901863 | 161848 | chr9:023901804-023901863 | 1.097808 | 1.060466 | -0.700448 | -0.21104795  |
| A_16_P18582907 | 9 | 23923298 | 23923357 | 187775 | chr9:023923298-023923357 | 0.572792 | 0.668039 | -0.260258 | -0.66953605  |
| A_16_P02079153 | 9 | 23946053 | 23946112 | 13682  | chr9:023946053-023946112 | 1.380425 | 1.067694 | -0.784016 | -0.08089411  |
| A_16_P18582993 | 9 | 23971151 | 23971210 | 133730 | chr9:023971151-023971210 | 0.690839 | 0.80187  | -1.224927 | -0.62625545  |
| A_16_P18583009 | 9 | 23991794 | 23991853 | 231886 | chr9:023991794-023991853 | 1.30087  | 1.297877 | -0.429591 | 0.12728404   |
| A_14_P123655   | 9 | 24022718 | 24022777 | 51445  | chr9:024022718-024022777 | 1.56872  | 1.347465 | -0.313983 | 0.38576758   |
| A_16_P02079287 | 9 | 24053497 | 24053556 | 225337 | chr9:024053497-024053556 | 0.908509 | 0.965087 | -1.060336 | -0.40344012  |
| A_16_P18583223 | 9 | 24073476 | 24073535 | 196239 | chr9:024073476-024073535 | 0.770859 | 0.716148 | -1.470315 | -0.6351812   |
| A_16_P02079347 | 9 | 24101221 | 24101280 | 82114  | chr9:024101221-024101280 | 1.37704  | 1.072223 | -0.4308   | 0.39784968   |
| A_14_P124975   | 9 | 24136307 | 24136366 | 4510   | chr9:024136307-024136366 | 1.446248 | 1.374383 | -0.336539 | 0.22453186   |
| A_16_P02079421 | 9 | 24160666 | 24160725 | 34911  | chr9:024160666-024160725 | 1.371956 | 1.20883  | -0.119789 | 0.41677672   |
| A_16_P38680828 | 9 | 24197831 | 24197890 | 68999  | chr9:024197831-024197890 | 1.368228 | 1.413814 | -0.304287 | 0.3867944    |
| A_16_P18583528 | 9 | 24232825 | 24232884 | 129264 | chr9:024232825-024232884 | 1.400239 | 1.381623 | -0.296855 | 0.3683744    |
| A_16_P02079563 | 9 | 24279661 | 24279720 | 20110  | chr9:024279661-024279720 | 0.557788 | 0.787181 | -1.432994 | -0.69156146  |
| A_16_P18583678 | 9 | 24300474 | 24300533 | 236677 | chr9:024300474-024300533 | 0.747898 | 0.65396  | -1.447236 | -0.5260428   |
| A_16_P18583773 | 9 | 24339363 | 24339422 | 210539 | chr9:024339363-024339422 | 1.165703 | 1.072644 | -0.755829 | 0.073887214  |
| A_16_P18583837 | 9 | 24376546 | 24376605 | 95710  | chr9:024376546-024376605 | 1.040812 | 1.043756 | -0.933481 | -0.079215616 |
| A_16_P18583909 | 9 | 24416310 | 24416369 | 185827 | chr9:024416310-024416369 | 1.161331 | 1.193329 | -0.737106 | 0.061629027  |
| A_16_P18583958 | 9 | 24439339 | 24439398 | 4571   | chr9:024439339-024439398 | 1.188707 | 1.106208 | -0.917034 | 0.030800328  |
| A_16_P18584041 | 9 | 24469961 | 24470020 | 91954  | chr9:024469961-024470020 | 1.486884 | 1.339094 | -0.241286 | 0.23989218   |
| A_16_P18584119 | 9 | 24495765 | 24495824 | 179604 | chr9:024495765-024495824 | 1.571414 | 1.688679 | -0.014476 | 0.6398244    |
| A_16_P02079877 | 9 | 24517115 | 24517174 | 78651  | chr9:024517115-024517174 | 1.133339 | 1.134222 | -0.751358 | -0.029926091 |
| A_14_P133944   | 9 | 24538868 | 24538927 | 207797 | chr9:024538868-024538927 | 1.069679 | 0.945617 | -0.725046 | -0.054083437 |
| A_16_P38681703 | 9 | 24577294 | 24577353 | 13949  | chr9:024577294-024577353 | 1.06578  | 1.084032 | -0.702717 | 0.035214037  |
| A_16_P18584414 | 9 | 24603645 | 24603704 | 217310 | chr9:024603645-024603704 | 1.068949 | 1.00024  | -1.066603 | -0.23949176  |
| A_16_P18584498 | 9 | 24667137 | 24667196 | 179769 | chr9:024667137-024667196 | 0.830165 | 0.734952 | -1.148694 | -0.43905687  |
| A_14_P116740   | 9 | 24684752 | 24684811 | 7550   | chr9:024684752-024684811 | 0.740289 | 0.708764 | -1.16296  | -0.5036297   |
| A_16_P18584687 | 9 | 24744409 | 24744468 | 88299  | chr9:024744409-024744468 | 0.96697  | 0.714338 | -1.06018  | -0.25217852  |
| A_16_P02080226 | 9 | 24769705 | 24769764 | 91902  | chr9:024769705-024769764 | 1.322594 | 1.250841 | -0.503627 | 0.15012462   |
| A_16_P38682203 | 9 | 24804793 | 24804852 | 201628 | chr9:024804793-024804852 | 1.891783 | 1.749541 | 0.156543  | 0.87618667   |
| A_16_P18584883 | 9 | 24827828 | 24827887 | 135165 | chr9:024827828-024827887 | 0.737722 | 0.675333 | -1.258585 | -0.5759905   |
| A_14_P107920   | 9 | 24873989 | 24874048 | 146908 | chr9:024873989-024874048 | 1.035121 | 0.92289  | -0.85537  | 2.43E-04     |
| A_16_P18585127 | 9 | 24932348 | 24932407 | 209613 | chr9:024932348-024932407 | 1.143246 | 0.979486 | -0.724106 | 0.012492538  |
| A_16_P18585271 | 9 | 24986233 | 24986292 | 81397  | chr9:024986233-024986292 | 0.924135 | 0.856443 | -1.078219 | -0.3323362   |
| A_16_P18585355 | 9 | 25036145 | 25036204 | 237361 | chr9:025036145-025036204 | 1.164718 | 1.074599 | -0.584727 | 0.14735973   |
| A_16_P18585402 | 9 | 25057423 | 25057482 | 90513  | chr9:025057423-025057482 | 1.073809 | 1.030038 | -0.69416  | -0.027114749 |
| A_14_P103463   | 9 | 25081725 | 25081784 | 195760 | chr9:025081725-025081784 | 1.298767 | 1.07533  | 0.11662   | 0.61994004   |
| A_16_P18585523 | 9 | 25114915 | 25114974 | 42357  | chr9:025114915-025114974 | 0.927221 | 1.066635 | -1.003877 | -0.22055024  |
| A_16_P38682962 | 9 | 25144678 | 25144737 | 213096 | chr9:025144678-025144737 | 0.990442 | 1.069074 | -0.584878 | -0.12896124  |
| A_14_P115765   | 9 | 25195505 | 25195564 | 216474 | chr9:025195505-025195564 | 1.034363 | 1.009854 | -0.684792 | -0.042622745 |
| A_16_P18585743 | 9 | 25217246 | 25217305 | 222660 | chr9:025217246-025217305 | 1.487454 | 1.541998 | -0.460732 | 0.45009828   |
| A_16_P18585800 | 9 | 25249013 | 25249072 | 190294 | chr9:025249013-025249072 | 1.22472  | 1.289648 | -0.304623 | 0.26422507   |

|                |   |          |          |        |                          |          |          |           |              |
|----------------|---|----------|----------|--------|--------------------------|----------|----------|-----------|--------------|
| A_16_P38683265 | 9 | 25277213 | 25277272 | 7469   | chr9:025277213-025277272 | 0.593824 | 0.598993 | -1.35213  | -0.885618    |
| A_16_P02080962 | 9 | 25315601 | 25315660 | 171988 | chr9:025315601-025315660 | 1.264992 | 1.274835 | -0.542336 | 0.09123279   |
| A_16_P38683381 | 9 | 25336912 | 25336971 | 127376 | chr9:025336912-025336971 | 1.050787 | 1.101435 | -0.79992  | -0.03697659  |
| A_14_P125459   | 9 | 25357325 | 25357384 | 24805  | chr9:025357325-025357384 | 1.004648 | 0.994307 | -0.778006 | 0.032365143  |
| A_16_P18586070 | 9 | 25377669 | 25377728 | 240332 | chr9:025377669-025377728 | 0.896437 | 0.806072 | -1.101701 | -0.49637163  |
| A_16_P18586205 | 9 | 25439089 | 25439148 | 79368  | chr9:025439089-025439148 | 1.192212 | 1.011379 | -1.128938 | -0.15845329  |
| A_16_P18586273 | 9 | 25471638 | 25471697 | 219796 | chr9:025471638-025471697 | 1.653301 | 1.670356 | -0.394035 | 0.80363816   |
| A_16_P18586328 | 9 | 25494416 | 25494475 | 5618   | chr9:025494416-025494475 | 0.868313 | 0.952156 | -0.950109 | -0.32368195  |
| A_16_P18586371 | 9 | 25517395 | 25517454 | 205244 | chr9:025517395-025517454 | 1.277901 | 1.103721 | -0.539707 | 0.09499652   |
| A_16_P02081251 | 9 | 25538163 | 25538222 | 182986 | chr9:025538163-025538222 | 1.405407 | 1.354499 | -0.585917 | 0.1686279    |
| A_14_P104894   | 9 | 25573028 | 25573087 | 77694  | AK093337                 | 0.890729 | 0.945899 | -1.188927 | -0.46994138  |
| A_16_P18586616 | 9 | 25606019 | 25606078 | 57884  | chr9:025606019-025606078 | 0.82186  | 1.103782 | -1.296917 | -0.10625708  |
| A_16_P38684070 | 9 | 25630792 | 25630851 | 180547 | chr9:025630792-025630851 | 0.983111 | 0.960841 | -0.84813  | -0.33718246  |
| A_16_P18586423 | 9 | 25647493 | 25647552 | 200863 | chr9:025647493-025647552 | 1.498251 | 1.533907 | -0.12661  | 0.5279349    |
| A_16_P18586753 | 9 | 25657161 | 25657220 | 107179 | chr9:025657161-025657220 | 0.765515 | 0.871384 | -1.164536 | -0.23004958  |
| A_16_P18586761 | 9 | 25665903 | 25665962 | 207883 | chr9:025665903-025665962 | 1.140861 | 1.012382 | -0.690716 | -0.113986254 |
| A_16_P18586775 | 9 | 25670155 | 25670214 | 12906  | chr9:025670155-025670214 | 1.172302 | 1.213043 | -0.658637 | 0.036830068  |
| A_16_P18586795 | 9 | 25678698 | 25678757 | 134660 | chr9:025678698-025678757 | 0.860434 | 0.835689 | -0.974851 | -0.2574886   |
| A_16_P38684194 | 9 | 25685274 | 25685333 | 58204  | chr9:025685274-025685333 | 0.835973 | 0.753858 | -0.744057 | -0.32856762  |
| A_16_P38684216 | 9 | 25692847 | 25692906 | 98398  | chr9:025692847-025692906 | 1.106769 | 1.069221 | -0.483388 | 0.11084695   |
| A_16_P02081503 | 9 | 25703810 | 25703869 | 91294  | chr9:025703810-025703869 | 0.946632 | 0.780345 | -0.885749 | -0.26022583  |
| A_14_P109134   | 9 | 25728780 | 25728839 | 94206  | chr9:025728780-025728839 | 1.026751 | 1.024147 | -0.863303 | -0.031907767 |
| A_16_P18587013 | 9 | 25769222 | 25769281 | 77396  | chr9:025769222-025769281 | 1.198485 | 1.203286 | -0.559853 | -0.018137723 |
| A_16_P18587085 | 9 | 25796667 | 25796726 | 179924 | BC043546                 | 0.697865 | 0.612452 | -1.149733 | -0.50611126  |
| A_16_P38684550 | 9 | 25846578 | 25846637 | 64071  | chr9:025846578-025846637 | 1.436772 | 1.421234 | -0.751843 | 0.35491663   |
| A_14_P110074   | 9 | 25899346 | 25899405 | 3231   | chr9:025899346-025899405 | 1.021441 | 1.02655  | -0.812354 | -0.055893898 |
| A_16_P38684736 | 9 | 25943049 | 25943108 | 25173  | chr9:025943049-025943108 | 1.420932 | 1.3081   | -0.43066  | 0.35937658   |
| A_16_P18587402 | 9 | 25969531 | 25969590 | 191595 | chr9:025969531-025969590 | 1.28367  | 1.135069 | -0.525549 | 0.14415982   |
| A_16_P38684851 | 9 | 26005964 | 26006023 | 59368  | chr9:026005964-026006023 | 0.927779 | 0.788678 | -0.868762 | -0.24578616  |
| A_16_P18587537 | 9 | 26032329 | 26032388 | 174334 | chr9:026032329-026032388 | 1.089091 | 1.057527 | -0.616083 | -0.09357339  |
| A_16_P18587561 | 9 | 26042554 | 26042613 | 193906 | chr9:026042554-026042613 | 0.903004 | 0.84284  | -0.892546 | -0.23708123  |
| A_16_P02081936 | 9 | 26049517 | 26049576 | 93463  | chr9:026049517-026049576 | 1.363339 | 1.152673 | -0.510271 | 0.20415157   |
| A_16_P02081957 | 9 | 26060321 | 26060380 | 174255 | AK131322                 | 1.237364 | 1.066441 | -0.535017 | -0.15248495  |
| A_16_P18587637 | 9 | 26071304 | 26071363 | 107183 | AK131322                 | 1.076024 | 1.621115 | -0.692343 | 0.11020205   |
| A_16_P18587656 | 9 | 26080382 | 26080441 | 139384 | AK131322                 | 1.055481 | 1.128321 | -0.523973 | 0.04437551   |
| A_14_P106279   | 9 | 26086341 | 26086400 | 159879 | AK131322                 | 1.14965  | 1.149167 | -0.647312 | 0.06893799   |
| A_16_P02082004 | 9 | 26104455 | 26104514 | 129458 | AK131322                 | 1.266148 | 1.340406 | -0.288293 | 0.16594158   |
| A_16_P18587740 | 9 | 26116415 | 26116474 | 147045 | chr9:026116415-026116474 | 1.496176 | 1.207016 | -0.355094 | 0.22238207   |
| A_16_P02082042 | 9 | 26123251 | 26123310 | 199806 | chr9:026123251-026123310 | 1.027508 | 1.133338 | -0.392795 | 0.006523684  |
| A_16_P38685249 | 9 | 26152115 | 26152174 | 153330 | chr9:026152115-026152174 | 1.123005 | 1.143503 | -0.666353 | -0.11768046  |
| A_16_P18587965 | 9 | 26195023 | 26195082 | 148861 | chr9:026195023-026195082 | 1.192575 | 1.054852 | -0.633685 | -0.01618436  |
| A_16_P18588025 | 9 | 26215945 | 26216004 | 70522  | chr9:026215945-026216004 | 1.167208 | 1.030392 | -0.370584 | 0.08195662   |
| A_16_P18588108 | 9 | 26246129 | 26246188 | 101636 | chr9:026246129-026246188 | 0.43906  | 0.479099 | -1.298324 | -0.64745486  |
| A_16_P38685546 | 9 | 26264518 | 26264577 | 69215  | chr9:026264518-026264577 | 0.633397 | 0.657034 | -1.152224 | -0.36998022  |
| A_16_P18588206 | 9 | 26291109 | 26291168 | 39772  | chr9:026291109-026291168 | 1.154745 | 1.271818 | -0.462409 | 0.24837089   |
| A_14_P104406   | 9 | 26311885 | 26311944 | 112450 | chr9:026311885-026311944 | 1.756975 | 1.806136 | 0.362627  | 0.9747983    |
| A_16_P38685728 | 9 | 26347039 | 26347098 | 27909  | chr9:026347039-026347098 | 1.005276 | 1.0604   | -0.577128 | 0.04133001   |
| A_16_P18588388 | 9 | 26362320 | 26362379 | 85825  | chr9:026362320-026362379 | 1.209999 | 1.215786 | -0.391992 | 0.0467567    |
| A_16_P38685806 | 9 | 26376895 | 26376954 | 181338 | chr9:026376895-026376954 | 1.061304 | 1.157333 | -0.534464 | 0.09623594   |
| A_16_P18588453 | 9 | 26395992 | 26396051 | 168372 | chr9:026395992-026396051 | 1.217463 | 1.106443 | -0.371641 | 0.050651476  |
| A_16_P02082487 | 9 | 26413210 | 26413269 | 168786 | chr9:026413210-026413269 | 1.085558 | 1.20012  | -0.722526 | 0.007913724  |
| A_16_P18588551 | 9 | 26433722 | 26433781 | 65429  | chr9:026433722-026433781 | 1.058068 | 0.975596 | -0.870168 | -0.08781189  |
| A_14_P125576   | 9 | 26454989 | 26455048 | 63925  | chr9:026454989-026455048 | 1.002105 | 0.938834 | -0.748575 | -0.22891226  |
| A_16_P18588626 | 9 | 26473100 | 26473159 | 137964 | chr9:026473100-026473159 | 0.837421 | 0.8732   | -0.909842 | -0.4096086   |
| A_16_P18588634 | 9 | 26491363 | 26491422 | 155312 | chr9:026491363-026491422 | 1.69231  | 1.7705   | 0.163589  | 0.8245169    |
| A_16_P18588728 | 9 | 26521951 | 26522010 | 20832  | chr9:026521951-026522010 | 1.214561 | 1.120827 | -0.639125 | 0.037029177  |
| A_16_P18588771 | 9 | 26544355 | 26544414 | 131107 | chr9:026544355-026544414 | 0.884942 | 0.964302 | -1.037102 | -0.3167873   |
| A_16_P18588825 | 9 | 26566505 | 26566564 | 118655 | chr9:026566505-026566564 | 1.045172 | 0.94686  | -0.765824 | -0.08830428  |
| A_16_P02082709 | 9 | 26590444 | 26590503 | 21081  | chr9:026590444-026590503 | 1.300194 | 1.278737 | -0.458023 | 0.14130008   |
| A_16_P18588902 | 9 | 26613334 | 26613393 | 153638 | chr9:026613334-026613393 | 1.129324 | 1.209363 | -0.43466  | 0.089110605  |
| A_14_P111432   | 9 | 26639384 | 26639443 | 101542 | chr9:026639384-026639443 | 1.388574 | 1.503386 | 0.018767  | 0.5206852    |
| A_16_P18589114 | 9 | 26680984 | 26681043 | 34680  | chr9:026680984-026681043 | 1.25392  | 1.317464 | -0.506387 | 0.12689583   |
| A_16_P18589244 | 9 | 26736903 | 26736962 | 25199  | chr9:026736903-026736962 | 1.476294 | 1.51814  | -0.233681 | -0.08350086  |
| A_14_P135744   | 9 | 26790767 | 26790826 | 193179 | chr9:026790767-026790826 | 1.170839 | 1.17265  | -0.351545 | 0.07541944   |
| A_16_P18589429 | 9 | 26812713 | 26812772 | 67233  | chr9:026812713-026812772 | 0.705735 | 0.887259 | -0.7663   | -0.33169466  |
| A_16_P18589436 | 9 | 26821029 | 26821088 | 225560 | chr9:026821029-026821088 | 0.505143 | 0.436639 | -1.186804 | -0.7329991   |
| A_14_P118580   | 9 | 26831650 | 26831709 | 132287 | C9orf82                  | 1.185866 | 1.316454 | -0.41765  | 0.14644009   |
| A_16_P38686856 | 9 | 26840969 | 26841028 | 37502  | C9orf82                  | 1.376635 | 1.42009  | -0.314259 | 0.37251216   |
| A_16_P38686856 | 9 | 26840969 | 26841028 | 11157  | C9orf82                  | 1.467193 | 1.329828 | -0.139606 | 0.28915423   |
| A_16_P38686856 | 9 | 26840969 | 26841028 | 49597  | C9orf82                  | 1.431092 | 1.384692 | -0.233359 | 0.32437447   |
| A_16_P02083104 | 9 | 26854708 | 26854767 | 62592  | C9orf82                  | 0.762708 | 1.201441 | -0.552656 | 0.093133464  |
| A_16_P02083112 | 9 | 26860446 | 26860505 | 136769 | C9orf82                  | 1.342753 | 1.447555 | -0.410555 | 0.28760347   |
| A_14_P131102   | 9 | 26867539 | 26867598 | 170313 | C9orf82                  | 1.5141   | 1.552182 | 0.081262  | 0.52013385   |

|                |   |          |          |        |                          |          |           |           |              |
|----------------|---|----------|----------|--------|--------------------------|----------|-----------|-----------|--------------|
| A_16_P18589560 | 9 | 26873525 | 26873584 | 171178 | C9orf82                  | 1.086632 | 1.115789  | -0.692649 | -0.032903954 |
| A_16_P18589579 | 9 | 26879915 | 26879974 | 70935  | C9orf82                  | 1.17401  | 1.185482  | -0.300788 | 0.27019006   |
| A_16_P18589604 | 9 | 26890887 | 26890946 | 96568  | chr9:026890887-026890946 | 1.250137 | 1.241743  | -0.40944  | 0.14479831   |
| A_16_P38687016 | 9 | 26897970 | 26898029 | 2617   | PLAA                     | 1.174477 | 1.175742  | -0.486786 | -0.19391939  |
| A_14_P134594   | 9 | 26904780 | 26904839 | 57069  | PLAA                     | 0.717912 | 0.640859  | -1.219586 | -0.5832933   |
| A_16_P38687067 | 9 | 26913325 | 26913384 | 53837  | PLAA                     | 1.451289 | 1.453627  | -0.071387 | 0.50284827   |
| A_16_P18589687 | 9 | 26918356 | 26918415 | 102584 | PLAA                     | 1.044505 | 1.269694  | -0.482736 | 0.22929746   |
| A_16_P18589700 | 9 | 26925960 | 26926019 | 79497  | PLAA                     | 0.605969 | 0.559465  | -1.162125 | -0.8535092   |
| A_14_P127755   | 9 | 26933569 | 26933628 | 161065 | PLAA                     | 0.667018 | 0.638391  | -1.019473 | -0.67564386  |
| A_16_P38687135 | 9 | 26942603 | 26942662 | 201520 | chr9:026942603-026942662 | 1.466131 | 1.325792  | -0.190799 | 0.31403995   |
| A_16_P02083248 | 9 | 26951929 | 26951988 | 149739 | IFT74                    | 1.237168 | 1.22949   | -0.452029 | -0.032791317 |
| A_16_P18589768 | 9 | 26960230 | 26960289 | 14294  | IFT74                    | 0.913798 | 0.667648  | -0.947958 | -0.46501613  |
| A_16_P38687191 | 9 | 26970599 | 26970658 | 122424 | IFT74                    | 0.628917 | 0.669686  | -1.163844 | -0.60651976  |
| A_16_P18589793 | 9 | 26975915 | 26975974 | 97133  | IFT74                    | 1.170625 | 1.286394  | -0.410647 | 0.11177485   |
| A_16_P38687230 | 9 | 26983676 | 26983735 | 48894  | IFT74                    | 0.546087 | 1.045132  | -1.154943 | -0.5701419   |
| A_14_P120970   | 9 | 26989600 | 26989659 | 193502 | IFT74                    | 1.004383 | 0.983662  | -0.651855 | -0.22945201  |
| A_16_P18589847 | 9 | 26993783 | 26993842 | 57134  | IFT74                    | 1.17142  | 1.13106   | -0.543678 | 0.008731335  |
| A_16_P38687274 | 9 | 26999032 | 26999091 | 90444  | IFT74                    | 1.247073 | 1.335951  | -0.367906 | 0.18467018   |
| A_16_P02083322 | 9 | 27006983 | 27007042 | 889    | IFT74                    | 1.182787 | 1.292976  | -0.4694   | 0.08222658   |
| A_14_P120037   | 9 | 27019070 | 27019129 | 86779  | IFT74                    | 1.082535 | 1.087322  | -0.746857 | -0.16989294  |
| A_16_P38687330 | 9 | 27025300 | 27025359 | 30874  | IFT74                    | 0.846455 | 0.91478   | -0.985058 | -0.46808457  |
| A_16_P02083348 | 9 | 27033057 | 27033116 | 227907 | IFT74                    | 1.691213 | 1.638396  | 0.1293    | 0.57772017   |
| A_16_P38687373 | 9 | 27043788 | 27043847 | 213958 | IFT74                    | 0.901839 | 1.119166  | -0.788942 | -0.19468263  |
| A_14_P132422   | 9 | 27052817 | 27052876 | 2797   | AK225570                 | 0.310781 | 0.351342  | -1.624643 | -0.91985834  |
| A_16_P18590005 | 9 | 27058282 | 27058341 | 157942 | chr9:027058282-027058341 | 1.964786 | 1.835125  | 0.41827   | 0.7704891    |
| A_16_P18590027 | 9 | 27071659 | 27071718 | 216840 | chr9:027071659-027071718 | 0.866086 | 0.838159  | -0.956859 | -0.57753587  |
| A_16_P18590053 | 9 | 27084327 | 27084386 | 187328 | chr9:027084327-027084386 | 1.031724 | 1.133997  | -0.628372 | -0.08648163  |
| A_16_P18590062 | 9 | 27094550 | 27094609 | 178698 | chr9:027094550-027094609 | 0.796882 | 0.728724  | -1.105566 | -0.3670352   |
| A_14_P117680   | 9 | 27100164 | 27100223 | 19152  | TEK                      | 0.993933 | 1.191308  | 0.217441  | 0.50033474   |
| A_14_P137338   | 9 | 27111885 | 27111944 | 40504  | TEK                      | 1.623028 | 1.478174  | 0.047017  | 0.76056015   |
| A_16_P38687538 | 9 | 27119951 | 27120010 | 15662  | TEK                      | 1.109431 | 1.188599  | -0.720684 | -0.20730141  |
| A_16_P02083473 | 9 | 27130516 | 27130575 | 38315  | TEK                      | 1.471354 | 1.474033  | -0.241455 | 0.37371397   |
| A_16_P38687581 | 9 | 27135601 | 27135660 | 148901 | TEK                      | 1.397585 | 1.414567  | -0.152901 | 0.30137953   |
| A_16_P02083487 | 9 | 27140808 | 27140866 | 104743 | TEK                      | 0.630321 | 0.688237  | -0.810882 | -0.5502472   |
| A_14_P136657   | 9 | 27148028 | 27148087 | 116682 | TEK                      | 1.89278  | 1.780965  | 0.310596  | 0.6913011    |
| A_16_P18590230 | 9 | 27158586 | 27158645 | 131080 | TEK                      | 1.06686  | 1.050276  | -0.458565 | 0.08497498   |
| A_16_P02083543 | 9 | 27175468 | 27175527 | 183316 | TEK                      | 1.786332 | 1.634409  | -0.051686 | 0.5734384    |
| A_16_P38687712 | 9 | 27182459 | 27182518 | 61492  | TEK                      | 1.674092 | 1.291294  | -0.229701 | 0.65671027   |
| A_16_P18590320 | 9 | 27192734 | 27192793 | 238388 | TEK                      | 0.763732 | 0.599211  | -1.341467 | -0.8711084   |
| A_16_P02083599 | 9 | 27203502 | 27203561 | 79995  | TEK                      | 1.064358 | 1.30088   | -0.626174 | -0.08344655  |
| A_16_P18590377 | 9 | 27208901 | 27208960 | 110464 | TEK                      | 1.359326 | 1.235918  | -0.372905 | -2.67E-04    |
| A_14_P116356   | 9 | 27220105 | 27220164 | 49101  | TEK                      | 0.819052 | 0.76378   | -1.062699 | -0.4357121   |
| A_14_P116356   | 9 | 27220105 | 27220164 | 128944 | TEK                      | 0.84013  | 0.727556  | -0.955227 | -0.50654906  |
| A_14_P116356   | 9 | 27220105 | 27220164 | 160409 | TEK                      | 0.854402 | 0.753214  | -1.098805 | -0.44282728  |
| A_16_P02083625 | 9 | 27229184 | 27229243 | 51466  | chr9:027229184-027229243 | 1.103015 | 1.003807  | -0.685066 | -0.22557789  |
| A_16_P18590419 | 9 | 27239620 | 27239679 | 128173 | AF418573                 | 1.050785 | 1.263124  | -0.483073 | 0.16627821   |
| A_16_P18590426 | 9 | 27247713 | 27247772 | 68654  | AF418573                 | 0.734805 | 0.648708  | -1.152118 | -0.6774956   |
| A_14_P121378   | 9 | 27253839 | 27253898 | 143189 | AF418573                 | 1.691139 | 1.561883  | -0.039078 | 0.8303317    |
| A_16_P18590468 | 9 | 27262953 | 27263012 | 103070 | AF418573                 | 1.296195 | 1.337381  | -0.681279 | -0.20452169  |
| A_16_P18590490 | 9 | 27269672 | 27269731 | 74624  | AF418573                 | 1.042857 | 1.103545  | -0.735742 | -0.10794979  |
| A_16_P38687959 | 9 | 27274759 | 27274818 | 200434 | C9orf11                  | 1.018094 | 0.983173  | -0.638249 | -0.26199374  |
| A_16_P38687999 | 9 | 27286964 | 27287023 | 168014 | C9orf11                  | 1.038134 | 0.978777  | -0.902319 | -0.39978713  |
| A_16_P02083728 | 9 | 27294778 | 27294837 | 48202  | chr9:027294778-027294837 | 1.195986 | 1.335306  | -0.526831 | 0.13718444   |
| A_16_P02083741 | 9 | 27303395 | 27303454 | 106664 | chr9:027303395-027303454 | 1.21016  | 1.522009  | -0.040124 | 0.56534123   |
| A_14_P125261   | 9 | 27316598 | 27316657 | 93509  | MOBK2B                   | 1.703169 | 1.84065   | -0.066355 | 0.6530788    |
| A_16_P18590650 | 9 | 27327845 | 27327904 | 11414  | MOBK2B                   | 2.12546  | 2.00726   | 0.57454   | 1.1931574    |
| A_16_P02083787 | 9 | 27333824 | 27333883 | 99480  | MOBK2B                   | 1.330894 | 1.361871  | -0.331342 | 0.20247148   |
| A_16_P38688146 | 9 | 27340649 | 27340708 | 67185  | MOBK2B                   | 1.527268 | 1.183987  | -0.212495 | -0.048204243 |
| A_16_P38688164 | 9 | 27346909 | 27346968 | 221227 | MOBK2B                   | 1.508648 | 1.48756   | -0.067257 | 0.440732     |
| A_16_P18590732 | 9 | 27354856 | 27354915 | 76117  | MOBK2B                   | 1.033601 | 0.918534  | -0.638766 | -0.44173878  |
| A_14_P109949   | 9 | 27364468 | 27364527 | 124620 | MOBK2B                   | 1.91836  | 1.93869   | 0.333076  | 0.9632621    |
| A_16_P18590786 | 9 | 27374534 | 27374593 | 173773 | MOBK2B                   | 1.342076 | 1.343054  | -0.459722 | 0.1266081    |
| A_16_P18590806 | 9 | 27382491 | 27382550 | 141425 | MOBK2B                   | 1.021987 | 1.122846  | -0.616334 | -0.12879136  |
| A_16_P38688298 | 9 | 27391763 | 27391822 | 123961 | MOBK2B                   | 1.359657 | 1.274455  | -0.421929 | 0.21914476   |
| A_16_P02083898 | 9 | 27398324 | 27398383 | 195682 | MOBK2B                   | 1.810311 | 1.835117  | 0.228651  | 0.7236196    |
| A_16_P18590867 | 9 | 27405812 | 27405871 | 238055 | MOBK2B                   | 1.089129 | 1.094506  | -0.549327 | -0.14303213  |
| A_16_P18590887 | 9 | 27414822 | 27414879 | 86676  | MOBK2B                   | 1.696401 | 1.742649  | 0.12081   | 0.60020906   |
| A_16_P18590910 | 9 | 27421853 | 27421912 | 238876 | MOBK2B                   | 1.615987 | 1.555462  | -0.809136 | -0.30750757  |
| A_16_P18590934 | 9 | 27430770 | 27430827 | 94403  | MOBK2B                   | 0.209948 | -0.116573 | -1.432288 | -0.93664455  |
| A_16_P18590959 | 9 | 27440583 | 27440642 | 131393 | MOBK2B                   | 0.981321 | 1.250594  | -0.509089 | 0.116102256  |
| A_14_P103371   | 9 | 27445716 | 27445771 | 234047 | MOBK2B                   | 1.061606 | 1.093396  | -0.656246 | -0.17130342  |
| A_16_P02083998 | 9 | 27454336 | 27454395 | 164761 | MOBK2B                   | 1.3662   | 1.335414  | -0.2469   | 0.23631036   |
| A_16_P02084015 | 9 | 27464501 | 27464560 | 203026 | MOBK2B                   | 1.466261 | 1.312506  | 0.133583  | 0.56991255   |

|                |   |          |          |        |                          |          |          |           |              |
|----------------|---|----------|----------|--------|--------------------------|----------|----------|-----------|--------------|
| A_16_P18591039 | 9 | 27472218 | 27472277 | 20776  | MOBK2B                   | 2.0428   | 2.030922 | 0.676955  | 0.56039476   |
| A_16_P18591054 | 9 | 27477884 | 27477943 | 196464 | MOBK2B                   | 1.307163 | 1.22115  | -0.355655 | 7.36E-04     |
| A_16_P38688555 | 9 | 27489644 | 27489703 | 224054 | MOBK2B                   | 1.339605 | 1.208557 | -0.437605 | -1.3188195   |
| A_16_P18591114 | 9 | 27498621 | 27498680 | 220324 | MOBK2B                   | 1.689241 | 1.750321 | 0.156414  | 0.5066978    |
| A_16_P18591131 | 9 | 27504367 | 27504426 | 206000 | MOBK2B                   | 0.809756 | 0.818372 | -0.801921 | -0.7055007   |
| A_16_P02084085 | 9 | 27510099 | 27510158 | 38029  | MOBK2B                   | 0.628083 | 0.579601 | -1.257164 | -0.7280142   |
| A_14_P129027   | 9 | 27514323 | 27514382 | 28825  | MOBK2B                   | 1.353831 | 1.483717 | -0.270424 | 0.13131112   |
| A_16_P38688670 | 9 | 27524478 | 27524537 | 126143 | chr9:027524478-027524537 | 1.663956 | 1.443455 | -0.20986  | 0.36063558   |
| A_16_P38688687 | 9 | 27529471 | 27529530 | 98122  | chr9:027529471-027529530 | 1.430279 | 1.143648 | -0.773005 | -0.20113355  |
| A_16_P38688707 | 9 | 27537786 | 27537845 | 166557 | C9orf72                  | 1.247331 | 1.109491 | -0.520201 | 0.03159219   |
| A_14_P113409   | 9 | 27546647 | 27546704 | 225268 | C9orf72                  | 1.116391 | 0.985161 | -0.259616 | 0.1959892    |
| A_16_P02084160 | 9 | 27551446 | 27551505 | 7046   | C9orf72                  | 1.340636 | 1.193084 | -0.623067 | -0.1960491   |
| A_16_P02084171 | 9 | 27557144 | 27557203 | 37775  | C9orf72                  | 1.381849 | 1.17247  | -0.558349 | 0.46674433   |
| A_14_P200248   | 9 | 27562119 | 27562178 | 180797 | C9orf72                  | 1.117141 | 1.244048 | -0.7758   | 0.059190586  |
| A_16_P18591314 | 9 | 27569493 | 27569551 | 122084 | chr9:027569493-027569551 | 0.601524 | 0.662508 | -1.402667 | -0.8106595   |
| A_16_P02084202 | 9 | 27576132 | 27576191 | 66908  | chr9:027576132-027576191 | 0.996202 | 0.828377 | -0.755359 | -0.2998932   |
| A_16_P18591359 | 9 | 27590659 | 27590718 | 44022  | chr9:027590659-027590718 | 0.922972 | 0.878891 | -0.945807 | -0.5864986   |
| A_14_P131150   | 9 | 27616876 | 27616935 | 219055 | chr9:027616876-027616935 | 1.549475 | 1.424101 | -0.456619 | 0.37653658   |
| A_16_P18591477 | 9 | 27651511 | 27651570 | 101844 | chr9:027651511-027651570 | 1.029502 | 0.955457 | -0.891707 | -0.28566518  |
| A_16_P18591544 | 9 | 27676969 | 27677028 | 49217  | chr9:027676969-027677028 | 1.104827 | 1.187558 | -0.7322   | -0.059111804 |
| A_16_P18591661 | 9 | 27721268 | 27721327 | 6162   | chr9:027721268-027721327 | 1.032444 | 0.997971 | -0.773845 | -0.24994254  |
| A_16_P02084423 | 9 | 27745844 | 27745902 | 1572   | chr9:027745844-027745902 | 1.290637 | 1.308369 | -0.435764 | 0.14964196   |
| A_14_P134672   | 9 | 27767632 | 27767691 | 8038   | chr9:027767632-027767691 | 1.21614  | 1.299198 | -0.588358 | 0.063554004  |
| A_16_P02084476 | 9 | 27787975 | 27788034 | 190594 | chr9:027787975-027788034 | 1.380269 | 1.449359 | -0.446363 | 0.32827306   |
| A_16_P18591781 | 9 | 27820251 | 27820310 | 225807 | chr9:027820251-027820310 | 1.733082 | 1.6143   | 0.050738  | 0.3410242    |
| A_16_P38689376 | 9 | 27831723 | 27831782 | 28570  | chr9:027831723-027831782 | 1.107494 | 1.138207 | -0.804839 | -0.2136625   |
| A_16_P18591984 | 9 | 27865071 | 27865130 | 72158  | chr9:027865071-027865130 | 1.421892 | 1.364813 | -0.316235 | 0.22363584   |
| A_16_P18592064 | 9 | 27889652 | 27889711 | 145268 | chr9:027889652-027889711 | 1.060777 | 1.40136  | -0.828434 | -0.050492376 |
| A_14_P129354   | 9 | 27906783 | 27906842 | 101092 | chr9:027906783-027906842 | 1.585518 | 1.522798 | -0.176413 | 0.40702593   |
| A_16_P18592137 | 9 | 27920767 | 27920826 | 190844 | chr9:027920767-027920826 | 1.62289  | 1.542058 | -0.179692 | 0.47519812   |
| A_16_P18592174 | 9 | 27931962 | 27932021 | 28679  | BX538226                 | 1.275629 | 1.584116 | -0.161622 | 0.44897658   |
| A_14_P135485   | 9 | 27939969 | 27940028 | 95060  | LINGO2                   | 1.762136 | 1.696672 | -0.081575 | 0.6598873    |
| A_16_P18592216 | 9 | 27945291 | 27945350 | 92477  | LINGO2                   | 0.868401 | 0.968068 | -0.860584 | -0.09059417  |
| A_16_P38689717 | 9 | 27953308 | 27953367 | 19831  | LINGO2                   | 1.150985 | 1.218563 | -0.619556 | -0.0199534   |
| A_16_P18592247 | 9 | 27960580 | 27960639 | 36814  | LINGO2                   | 1.452281 | 1.40869  | -0.330163 | 0.32946056   |
| A_16_P18592266 | 9 | 27965909 | 27965968 | 72741  | LINGO2                   | 1.293132 | 1.3157   | -0.487801 | -0.1622247   |
| A_16_P02084779 | 9 | 27974198 | 27974257 | 189597 | LINGO2                   | 1.347449 | 1.344447 | -0.511574 | 0.13246629   |
| A_16_P38689810 | 9 | 27982821 | 27982880 | 152331 | LINGO2                   | 1.408918 | 1.142147 | -0.37648  | 0.44743288   |
| A_16_P18592339 | 9 | 27991821 | 27991880 | 120713 | LINGO2                   | 0.976082 | 0.998223 | -0.895276 | -0.31628478  |
| A_16_P18592370 | 9 | 28004311 | 28004370 | 169502 | LINGO2                   | 1.289118 | 1.324998 | -0.530839 | 0.15494537   |
| A_16_P38689877 | 9 | 28009432 | 28009491 | 205466 | LINGO2                   | 1.033984 | 1.07251  | -0.744137 | -0.006780878 |
| A_16_P18592398 | 9 | 28016855 | 28016914 | 179247 | LINGO2                   | 1.203127 | 1.32525  | -0.680132 | 0.100968145  |
| A_16_P18592422 | 9 | 28023204 | 28023263 | 74709  | LINGO2                   | 1.12636  | 1.284325 | -0.772462 | 0.13163206   |
| A_16_P18592442 | 9 | 28028897 | 28028956 | 44155  | LINGO2                   | 1.354341 | 1.389054 | -0.340865 | 0.2956575    |
| A_16_P38689973 | 9 | 28040562 | 28040621 | 82563  | LINGO2                   | 1.22182  | 1.638341 | -0.591733 | 0.2265837    |
| A_16_P38690008 | 9 | 28052304 | 28052363 | 81242  | LINGO2                   | 0.712648 | 0.604308 | -1.222292 | -0.5022027   |
| A_16_P18592537 | 9 | 28057657 | 28057716 | 67970  | LINGO2                   | 1.319639 | 1.403802 | -0.467057 | 0.30761063   |
| A_16_P18592565 | 9 | 28067265 | 28067324 | 40210  | LINGO2                   | 0.859777 | 0.843177 | -1.152541 | -0.31079102  |
| A_16_P18592578 | 9 | 28072556 | 28072615 | 242758 | LINGO2                   | 1.186035 | 1.455629 | -0.563441 | 0.14316052   |
| A_16_P02084966 | 9 | 28078412 | 28078471 | 193138 | LINGO2                   | 1.493172 | 1.566625 | -0.185193 | 0.24215975   |
| A_16_P02084976 | 9 | 28088731 | 28088790 | 36818  | LINGO2                   | 0.47441  | 0.531423 | -1.450098 | -0.5697735   |
| A_16_P18592643 | 9 | 28101534 | 28101593 | 148954 | LINGO2                   | 1.430587 | 1.386734 | -0.271956 | 0.4060821    |
| A_16_P02085012 | 9 | 28116628 | 28116687 | 152227 | LINGO2                   | 1.410438 | 1.397929 | -0.154575 | 0.32068536   |
| A_16_P18592703 | 9 | 28125008 | 28125067 | 151068 | LINGO2                   | 0.506868 | 0.888804 | -0.970921 | -0.3989303   |
| A_16_P38690220 | 9 | 28133347 | 28133406 | 91624  | LINGO2                   | 0.616715 | 0.865114 | -0.707548 | -0.20632762  |
| A_16_P18592771 | 9 | 28145064 | 28145123 | 153515 | LINGO2                   | 0.374437 | 0.592701 | -1.232626 | -0.4100269   |
| A_16_P38690292 | 9 | 28155086 | 28155145 | 9811   | LINGO2                   | 0.771843 | 1.211093 | -0.777558 | 0.010030761  |
| A_16_P18592824 | 9 | 28163232 | 28163291 | 162756 | LINGO2                   | 0.250524 | 0.666565 | -1.465665 | -0.8140943   |
| A_16_P18592863 | 9 | 28175930 | 28175989 | 71235  | LINGO2                   | 0.87719  | 1.289903 | -0.548018 | 0.11028499   |
| A_16_P18592878 | 9 | 28181461 | 28181520 | 130406 | LINGO2                   | 1.279312 | 1.444744 | 0.105176  | 0.5601522    |
| A_16_P18592895 | 9 | 28189070 | 28189129 | 19114  | LINGO2                   | 0.762062 | 1.238194 | -0.434837 | 0.16706882   |
| A_16_P18592917 | 9 | 28196294 | 28196353 | 141469 | LINGO2                   | 1.163459 | 1.233783 | -0.379758 | -0.109543025 |
| A_14_P101686   | 9 | 28203365 | 28203424 | 137111 | LINGO2                   | 0.80059  | 1.088372 | -0.359321 | 0.21298413   |
| A_16_P02085177 | 9 | 28209132 | 28209191 | 239097 | LINGO2                   | 1.076312 | 1.236355 | -0.335949 | 0.24982157   |
| A_16_P18592980 | 9 | 28216376 | 28216435 | 215849 | LINGO2                   | 0.665518 | 1.097992 | -0.482764 | 0.12346819   |
| A_16_P18593003 | 9 | 28223219 | 28223278 | 14905  | LINGO2                   | 0.654786 | 0.939731 | -0.606714 | -0.16657338  |
| A_16_P18593008 | 9 | 28239623 | 28239682 | 12432  | LINGO2                   | 0.930287 | 0.918207 | -1.002504 | -0.46376395  |
| A_16_P18593022 | 9 | 28245837 | 28245896 | 143633 | LINGO2                   | 0.848614 | 0.665121 | -0.670042 | 0.09831895   |
| A_16_P18593044 | 9 | 28251590 | 28251649 | 109267 | LINGO2                   | 0.389609 | 0.649022 | -1.206045 | -0.68810743  |
| A_16_P02085250 | 9 | 28265489 | 28265548 | 214199 | LINGO2                   | 1.030299 | 1.227041 | -0.355306 | 0.21559      |
| A_16_P38690590 | 9 | 28272347 | 28272406 | 68024  | LINGO2                   | 0.705792 | 0.966898 | -0.633437 | -0.003350377 |
| A_16_P18593126 | 9 | 28283812 | 28283871 | 216235 | LINGO2                   | 0.611912 | 1.011844 | -0.976196 | -0.2496967   |
| A_16_P18593160 | 9 | 28294971 | 28295030 | 149477 | LINGO2                   | 0.884877 | 1.247026 | -0.42871  | 0.21846262   |

|                |   |          |          |        |                          |          |          |           |              |
|----------------|---|----------|----------|--------|--------------------------|----------|----------|-----------|--------------|
| A_16_P18593197 | 9 | 28310731 | 28310790 | 193817 | LINGO2                   | 0.934837 | 1.183093 | -0.720878 | 0.001434639  |
| A_16_P18593214 | 9 | 28318562 | 28318621 | 156352 | LINGO2                   | 0.637152 | 1.071538 | -0.791208 | -0.07289961  |
| A_16_P38690736 | 9 | 28329106 | 28329165 | 118795 | LINGO2                   | 0.443014 | 0.826468 | -1.201055 | -0.5857124   |
| A_16_P38690757 | 9 | 28335772 | 28335831 | 232929 | LINGO2                   | 0.774539 | 1.285384 | -0.57918  | 0.2996015    |
| A_16_P18593279 | 9 | 28347447 | 28347506 | 202958 | LINGO2                   | 0.069657 | 0.393137 | -1.45469  | -0.7919937   |
| A_16_P18593299 | 9 | 28353982 | 28354041 | 150478 | LINGO2                   | 0.397054 | 0.623611 | -1.256231 | -0.4177606   |
| A_16_P18593339 | 9 | 28367878 | 28367937 | 113201 | LINGO2                   | 0.566877 | 0.955523 | -0.882004 | -0.12324861  |
| A_16_P02085428 | 9 | 28376175 | 28376234 | 226158 | LINGO2                   | 0.446089 | 0.406479 | -1.010328 | -0.57913756  |
| A_16_P18593380 | 9 | 28381666 | 28381725 | 137463 | LINGO2                   | 0.778222 | 1.052048 | -0.591107 | -0.018114626 |
| A_16_P18593404 | 9 | 28388919 | 28388978 | 147321 | LINGO2                   | 0.915169 | 1.387479 | -0.165924 | 0.11907101   |
| A_16_P38690935 | 9 | 28400285 | 28400344 | 112081 | LINGO2                   | 0.463754 | 1.033197 | -0.995703 | -0.1467703   |
| A_16_P18593466 | 9 | 28408992 | 28409051 | 68194  | LINGO2                   | 0.821035 | 1.256907 | -0.610123 | -0.08451933  |
| A_16_P18593495 | 9 | 28420005 | 28420064 | 116399 | LINGO2                   | 1.027199 | 1.324782 | -0.790279 | 0.22604932   |
| A_16_P38691006 | 9 | 28425170 | 28425229 | 190901 | LINGO2                   | 0.8289   | 1.088899 | -0.643205 | 0.022651926  |
| A_16_P18593530 | 9 | 28433076 | 28433135 | 119673 | LINGO2                   | 0.907394 | 1.177426 | -0.595942 | 0.16804096   |
| A_16_P18593546 | 9 | 28440634 | 28440693 | 192332 | LINGO2                   | 0.614536 | 0.879817 | -1.052656 | -0.12594858  |
| A_16_P18593587 | 9 | 28452103 | 28452162 | 46328  | LINGO2                   | 0.200005 | 1.009124 | -0.895901 | -0.4616716   |
| A_16_P18593600 | 9 | 28457391 | 28457450 | 183970 | LINGO2                   | 0.774527 | 1.008766 | -0.632459 | -0.06772539  |
| A_16_P38691117 | 9 | 28465880 | 28465939 | 79242  | LINGO2                   | 0.640195 | 1.000909 | -0.9578   | -0.20281705  |
| A_16_P18593639 | 9 | 28471519 | 28471578 | 143757 | LINGO2                   | 0.675787 | 1.039974 | -0.771779 | -0.08661237  |
| A_16_P18593657 | 9 | 28477524 | 28477583 | 210520 | LINGO2                   | 0.470597 | 0.809959 | -1.020337 | -0.47763002  |
| A_16_P02085616 | 9 | 28483236 | 28483295 | 39094  | LINGO2                   | 0.881057 | 1.188773 | -0.72531  | 0.016008615  |
| A_16_P02085620 | 9 | 28490238 | 28490297 | 213269 | LINGO2                   | 0.768245 | 1.046725 | -0.673358 | -0.06476262  |
| A_16_P18593704 | 9 | 28497312 | 28497371 | 199763 | LINGO2                   | 1.312667 | 1.689344 | -0.438076 | 0.6297853    |
| A_16_P18593719 | 9 | 28503790 | 28503849 | 197699 | LINGO2                   | 0.617761 | 0.954751 | -1.214563 | -0.318599    |
| A_14_P113468   | 9 | 28509569 | 28509628 | 156900 | LINGO2                   | 0.609942 | 0.707036 | -0.673856 | 0.06086628   |
| A_16_P38691253 | 9 | 28521421 | 28521480 | 64186  | LINGO2                   | 0.556869 | 0.958252 | -1.056796 | -0.5748534   |
| A_16_P18593783 | 9 | 28530732 | 28530791 | 89455  | LINGO2                   | 0.611171 | 0.874049 | -0.866513 | -0.2452094   |
| A_16_P02085694 | 9 | 28536934 | 28536993 | 46548  | LINGO2                   | 1.115612 | 1.404666 | -0.644981 | 0.3773117    |
| A_16_P18593822 | 9 | 28551981 | 28552040 | 166933 | LINGO2                   | 0.619345 | 1.028822 | -1.004265 | -0.20876348  |
| A_16_P18593856 | 9 | 28564371 | 28564430 | 21286  | LINGO2                   | 0.415356 | 0.756311 | -1.160449 | -0.45538825  |
| A_16_P02085737 | 9 | 28570284 | 28570343 | 99359  | LINGO2                   | 0.743017 | 1.13799  | -0.682041 | 0.020451799  |
| A_16_P18593888 | 9 | 28575812 | 28575871 | 108841 | LINGO2                   | 0.923114 | 1.340048 | -0.62563  | 0.27624154   |
| A_16_P02085760 | 9 | 28583541 | 28583600 | 135153 | LINGO2                   | 1.021696 | 1.456652 | -0.511681 | 0.23492287   |
| A_16_P38691419 | 9 | 28588904 | 28588963 | 164307 | LINGO2                   | 0.915184 | 1.241423 | -0.462478 | 0.15734331   |
| A_16_P18593944 | 9 | 28594283 | 28594342 | 7421   | LINGO2                   | 0.934423 | 1.063049 | -0.471032 | 0.3099743    |
| A_16_P18593980 | 9 | 28607633 | 28607692 | 174156 | LINGO2                   | 0.953932 | 1.370397 | -0.372378 | 0.17719531   |
| A_16_P18593995 | 9 | 28618391 | 28618450 | 161358 | LINGO2                   | 1.042236 | 1.29874  | -0.412057 | 0.2420563    |
| A_16_P38691506 | 9 | 28624165 | 28624224 | 100820 | LINGO2                   | 0.318951 | 0.611151 | -1.276882 | -0.5473787   |
| A_16_P38691514 | 9 | 28631593 | 28631652 | 93010  | LINGO2                   | 0.760051 | 1.071544 | -0.661537 | -0.033412814 |
| A_16_P18594035 | 9 | 28638337 | 28638396 | 211449 | LINGO2                   | 0.860037 | 1.190785 | -0.56063  | 0.1571091    |
| A_16_P18594062 | 9 | 28649097 | 28649156 | 178952 | LINGO2                   | 0.383685 | 0.846935 | -1.257619 | -0.37704307  |
| A_14_P201930   | 9 | 28660178 | 28660237 | 199899 | LINGO2                   | 0.419926 | 0.95064  | -0.985657 | -0.09906438  |
| A_14_P137718   | 9 | 28660476 | 28660535 | 7543   | LINGO2                   | 0.719463 | 1.11412  | -0.720866 | 0.05799736   |
| A_16_P38691622 | 9 | 28667672 | 28667731 | 165649 | LINGO2                   | 0.803048 | 1.290742 | -0.400474 | -0.03479542  |
| A_16_P18594139 | 9 | 28673257 | 28673316 | 125862 | LINGO2                   | 0.836558 | 1.252563 | -0.599203 | 0.08243499   |
| A_16_P18594166 | 9 | 28683054 | 28683113 | 4965   | LINGO2                   | 0.534266 | 1.086008 | -0.83771  | -0.3421234   |
| A_16_P38691683 | 9 | 28688497 | 28688556 | 36801  | LINGO2                   | 0.598457 | 0.96701  | -0.864282 | -0.27915046  |
| A_16_P18594188 | 9 | 28696126 | 28696185 | 62555  | LINGO2                   | 0.820587 | 1.353832 | -0.406421 | 0.2886635    |
| A_16_P18594231 | 9 | 28708395 | 28708454 | 94245  | LINGO2                   | 0.538922 | 0.988902 | -0.920499 | -0.12531525  |
| A_16_P02085979 | 9 | 28723296 | 28723355 | 142732 | chr9:028723296-028723355 | 0.300396 | 0.751664 | -1.416992 | -0.6352704   |
| A_14_P120186   | 9 | 28734987 | 28735046 | 101846 | chr9:028734987-028735046 | 0.543463 | 1.149168 | -0.908547 | -0.21360147  |
| A_16_P18594366 | 9 | 28767359 | 28767418 | 128856 | chr9:028767359-028767418 | 0.928434 | 1.363999 | -0.441709 | 0.22213241   |
| A_16_P18594440 | 9 | 28793548 | 28793607 | 202077 | chr9:028793548-028793607 | 0.589424 | 0.941713 | -0.959969 | -0.23302421  |
| A_16_P18594529 | 9 | 28822744 | 28822803 | 10861  | chr9:028822744-028822803 | 0.55276  | 0.942867 | -0.999448 | -0.21279359  |
| A_16_P18594578 | 9 | 28839082 | 28839141 | 45131  | chr9:028839082-028839141 | 0.187336 | 0.830291 | -1.366421 | -0.7723069   |
| A_16_P38692124 | 9 | 28856361 | 28856420 | 183991 | chr9:028856361-028856420 | 0.431644 | 0.828904 | -1.1383   | -0.5013716   |
| A_16_P18594683 | 9 | 28877359 | 28877418 | 134571 | chr9:028877359-028877418 | 0.611823 | 0.948113 | -1.007644 | -0.4236564   |
| A_16_P18594799 | 9 | 28922391 | 28922450 | 210173 | chr9:028922391-028922450 | 0.520604 | 0.939491 | -0.934507 | -0.26002812  |
| A_16_P18594862 | 9 | 28949450 | 28949509 | 135982 | chr9:028949450-028949509 | 0.804549 | 1.238334 | -0.78263  | 0.04704681   |
| A_16_P18594915 | 9 | 28971015 | 28971074 | 93382  | chr9:028971015-028971074 | 0.038344 | 0.591396 | -1.377567 | -0.60625905  |
| A_16_P18594958 | 9 | 28993990 | 28994049 | 202070 | chr9:028993990-028994049 | 0.524792 | 0.810434 | -1.142154 | -0.53754442  |
| A_14_P111082   | 9 | 29012489 | 29012548 | 177711 | chr9:029012489-029012548 | 0.67996  | 1.050712 | -0.981554 | -0.052292496 |
| A_16_P38692561 | 9 | 29030479 | 29030538 | 136502 | chr9:029030479-029030538 | 0.307474 | 0.789372 | -1.208131 | -0.6324598   |
| A_16_P18595102 | 9 | 29056874 | 29056933 | 225875 | chr9:029056874-029056933 | 0.150525 | 0.528199 | -1.453195 | -0.6157638   |
| A_16_P18595148 | 9 | 29075216 | 29075275 | 27673  | chr9:029075216-029075275 | 0.873668 | 1.273773 | -0.69267  | 0.21943977   |
| A_16_P18595229 | 9 | 29101303 | 29101362 | 172695 | chr9:029101303-029101362 | 0.886982 | 1.21722  | -0.964942 | -0.056075603 |
| A_16_P38692768 | 9 | 29116601 | 29116660 | 51710  | chr9:029116601-029116660 | 0.658847 | 1.043923 | -1.143331 | -0.21202824  |
| A_16_P18595302 | 9 | 29134790 | 29134849 | 187075 | chr9:029134790-029134849 | 0.963469 | 1.417315 | -0.64248  | 0.14866358   |
| A_16_P02086642 | 9 | 29155476 | 29155535 | 121188 | chr9:029155476-029155535 | 0.403137 | 0.917507 | -1.122325 | -0.35495573  |
| A_16_P18595454 | 9 | 29186207 | 29186266 | 133378 | chr9:029186207-029186266 | 0.66878  | 1.068282 | -0.925087 | -0.027738541 |
| A_14_P106446   | 9 | 29209997 | 29210056 | 6797   | chr9:029209997-029210056 | 0.764586 | 1.160582 | 0.092369  | 0.3432469    |
| A_16_P18595637 | 9 | 29245323 | 29245382 | 212366 | chr9:029245323-029245382 | 0.021899 | 0.289425 | -2.148706 | -1.0628438   |

|                |   |          |          |        |                          |           |          |           |              |
|----------------|---|----------|----------|--------|--------------------------|-----------|----------|-----------|--------------|
| A_16_P38693207 | 9 | 29289692 | 29289751 | 113268 | chr9:029289692-029289751 | 0.794139  | 1.25511  | -0.895684 | -0.07432428  |
| A_16_P18595815 | 9 | 29325739 | 29325798 | 72426  | chr9:029325739-029325798 | 0.187682  | 0.564471 | -1.628795 | -0.8739524   |
| A_16_P18595874 | 9 | 29358120 | 29358179 | 101536 | chr9:029358120-029358179 | 0.629262  | 1.198974 | -0.788108 | -0.21464366  |
| A_16_P18595986 | 9 | 29414766 | 29414825 | 95580  | chr9:029414766-029414825 | 0.765588  | 1.29232  | -0.537983 | 0.19626965   |
| A_14_P102285   | 9 | 29447747 | 29447806 | 211539 | chr9:029447747-029447806 | 0.426147  | 0.789937 | -1.211892 | -0.56722945  |
| A_16_P38693584 | 9 | 29475125 | 29475184 | 194081 | chr9:029475125-029475184 | 0.789594  | 1.204053 | -0.42605  | -0.057251066 |
| A_16_P38693691 | 9 | 29534064 | 29534123 | 46334  | chr9:029534064-029534123 | 0.620575  | 1.020542 | -0.720774 | -0.02528447  |
| A_16_P38693759 | 9 | 29565728 | 29565787 | 235212 | chr9:029565728-029565787 | 0.283058  | 0.690805 | -1.390017 | -0.5293584   |
| A_14_P128761   | 9 | 29591835 | 29591894 | 106753 | chr9:029591835-029591894 | 0.534259  | 0.975527 | -0.905671 | -0.17580014  |
| A_16_P18596381 | 9 | 29636351 | 29636410 | 222905 | chr9:029636351-029636410 | 0.599291  | 0.901997 | -1.158643 | -0.34505904  |
| A_16_P18596420 | 9 | 29657438 | 29657497 | 188454 | chr9:029657438-029657497 | 0.834745  | 1.15505  | -0.704067 | -0.04201828  |
| A_16_P02087296 | 9 | 29685999 | 29686058 | 202693 | chr9:029685999-029686058 | 1.315087  | 1.717866 | -0.049759 | 0.68100977   |
| A_14_P107553   | 9 | 29743333 | 29743392 | 143958 | chr9:029743333-029743392 | 0.555306  | 0.974522 | -0.770624 | -0.19801772  |
| A_16_P18596680 | 9 | 29778581 | 29778640 | 184903 | chr9:029778581-029778640 | 0.584955  | 1.016061 | -1.032774 | -0.36887777  |
| A_16_P18596741 | 9 | 29803526 | 29803585 | 188717 | chr9:029803526-029803585 | 0.480504  | 0.920202 | -1.118108 | -0.25729698  |
| A_16_P18596802 | 9 | 29839166 | 29839225 | 94306  | chr9:029839166-029839225 | 0.275101  | 0.792352 | -1.460779 | -0.42113543  |
| A_16_P18596887 | 9 | 29869482 | 29869541 | 181063 | chr9:029869482-029869541 | 0.667732  | 1.043367 | -0.500241 | -0.043303177 |
| A_14_P119736   | 9 | 29908743 | 29908802 | 55337  | chr9:029908743-029908802 | 0.907988  | 1.213312 | -0.53518  | 0.20191638   |
| A_16_P18597010 | 9 | 29932601 | 29932660 | 124586 | chr9:029932601-029932660 | 0.908874  | 1.242758 | -0.564493 | 0.3340985    |
| A_16_P18597091 | 9 | 29972920 | 29972979 | 54980  | chr9:029972920-029972979 | 0.64822   | 0.991126 | -1.049363 | -0.115326315 |
| A_16_P18597128 | 9 | 29996104 | 29996163 | 62288  | chr9:029996104-029996163 | 0.60946   | 0.877744 | -0.77574  | 0.046429455  |
| A_16_P38694708 | 9 | 30018272 | 30018331 | 208624 | chr9:030018272-030018331 | 0.816501  | 1.082348 | -0.752511 | -0.052873194 |
| A_16_P18597249 | 9 | 30042434 | 30042493 | 145438 | chr9:030042434-030042493 | 0.597869  | 1.020854 | -0.81186  | -0.082056224 |
| A_16_P38694822 | 9 | 30063588 | 30063647 | 34419  | chr9:030063588-030063647 | 0.72154   | 1.090268 | -0.624087 | -0.04171869  |
| A_16_P18597307 | 9 | 30086705 | 30086764 | 51595  | chr9:030086705-030086764 | 1.035119  | 1.222108 | -0.558015 | 0.3062083    |
| A_14_P106899   | 9 | 30134402 | 30134461 | 161386 | chr9:030134402-030134461 | 0.855789  | 1.229485 | -0.449645 | 0.05297555   |
| A_16_P18597620 | 9 | 30198326 | 30198385 | 162457 | chr9:030198326-030198385 | 0.514296  | 0.849838 | -0.998342 | -0.31233084  |
| A_16_P18597727 | 9 | 30237394 | 30237453 | 34357  | chr9:030237394-030237453 | 0.629083  | 1.06926  | -0.908783 | 0.03229031   |
| A_16_P18597822 | 9 | 30286393 | 30286452 | 219373 | chr9:030286393-030286452 | 0.495642  | 0.908737 | -1.118434 | -0.32928234  |
| A_16_P02088115 | 9 | 30311408 | 30311467 | 134612 | chr9:030311408-030311467 | 0.364705  | 0.769834 | -1.299501 | -0.38948458  |
| A_16_P18597912 | 9 | 30347226 | 30347285 | 42229  | chr9:030347226-030347285 | 0.930485  | 1.129056 | -0.599867 | -0.02726096  |
| A_16_P18597967 | 9 | 30374457 | 30374516 | 209342 | chr9:030374457-030374516 | 0.573394  | 0.982735 | -1.222215 | -0.35290092  |
| A_16_P38695495 | 9 | 30392242 | 30392301 | 209582 | BC022036                 | 0.071236  | 0.267634 | -1.17435  | -0.8157059   |
| A_14_P125500   | 9 | 30414069 | 30414128 | 216993 | BC022036                 | 0.727073  | 1.106237 | -1.10761  | -0.567318    |
| A_16_P02088224 | 9 | 30425335 | 30425394 | 19563  | BC022036                 | 0.106564  | 0.287272 | -1.18834  | -1.3731838   |
| A_16_P18598071 | 9 | 30444191 | 30444250 | 137494 | BC022036                 | 0.99595   | 1.30303  | -0.384726 | 0.41372913   |
| A_16_P18598091 | 9 | 30457031 | 30457090 | 39861  | BC022036                 | 0.678167  | 1.008908 | -0.874996 | -0.2020331   |
| A_16_P18598120 | 9 | 30468862 | 30468921 | 102941 | BC022036                 | 0.778858  | 1.015165 | -0.676578 | 0.099506624  |
| A_16_P18598148 | 9 | 30480741 | 30480800 | 68657  | BC022036                 | 0.5747    | 0.908513 | -0.817607 | -0.19000679  |
| A_16_P18598160 | 9 | 30490204 | 30490263 | 88756  | BC022036                 | 0.599264  | 1.180076 | -1.081776 | -0.5030834   |
| A_16_P18598202 | 9 | 30510898 | 30510957 | 168052 | BC022036                 | 0.48631   | 0.913601 | -1.130036 | -0.4945544   |
| A_16_P18598247 | 9 | 30524794 | 30524853 | 201950 | BC022036                 | 0.272263  | 0.558877 | -1.040554 | -0.4733653   |
| A_14_P133121   | 9 | 30542335 | 30542394 | 243489 | BC022036                 | 0.206008  | 0.469163 | -1.350781 | -0.6948773   |
| A_16_P18598290 | 9 | 30556050 | 30556109 | 151148 | BC022036                 | 0.622023  | 0.98313  | -0.919571 | -0.00934197  |
| A_16_P18598304 | 9 | 30566082 | 30566141 | 155972 | chr9:030566082-030566141 | 0.621017  | 1.382429 | -0.360497 | 0.2891667    |
| A_16_P18598349 | 9 | 30588350 | 30588409 | 39037  | chr9:030588350-030588409 | 0.254806  | 0.606674 | -1.371334 | -0.6771784   |
| A_16_P18598390 | 9 | 30608952 | 30609011 | 238413 | chr9:030608952-030609011 | 0.37227   | 0.716007 | -1.250495 | -0.47725272  |
| A_16_P18598430 | 9 | 30624087 | 30624146 | 10865  | chr9:030624087-030624146 | 0.710822  | 0.939802 | -0.757293 | -0.30860412  |
| A_16_P18598494 | 9 | 30650176 | 30650235 | 196645 | chr9:030650176-030650235 | 0.456317  | 0.752247 | -0.995349 | -0.27095762  |
| A_16_P18598584 | 9 | 30684198 | 30684257 | 176949 | chr9:030684198-030684257 | 0.508897  | 0.840373 | -0.822521 | -0.24096149  |
| A_16_P18598625 | 9 | 30701341 | 30701400 | 117265 | chr9:030701341-030701400 | 0.602978  | 0.897088 | -0.743783 | -0.4225725   |
| A_14_P116437   | 9 | 30737580 | 30737639 | 55110  | chr9:030737580-030737639 | 0.409564  | 0.740405 | -1.237303 | -0.97937465  |
| A_16_P18598841 | 9 | 30794907 | 30794966 | 196715 | chr9:030794907-030794966 | 0.501312  | 0.883148 | -0.807803 | -0.18064916  |
| A_16_P18598867 | 9 | 30804582 | 30804641 | 5664   | chr9:030804582-030804641 | 0.883574  | 1.133827 | -0.640227 | 0.05578102   |
| A_16_P18598888 | 9 | 30814798 | 30814857 | 98412  | chr9:030814798-030814857 | 0.712494  | 0.973859 | -0.80772  | -0.08071041  |
| A_16_P38696413 | 9 | 30823008 | 30823067 | 234960 | chr9:030823008-030823067 | 0.317572  | 0.702796 | -1.153469 | -0.6564845   |
| A_16_P18598913 | 9 | 30830303 | 30830362 | 14879  | chr9:030830303-030830362 | 0.567699  | 0.963264 | -0.846821 | -0.059744686 |
| A_16_P18598931 | 9 | 30839442 | 30839501 | 42034  | chr9:030839442-030839501 | -0.082673 | 0.723329 | -1.409059 | -0.9753512   |
| A_16_P18598965 | 9 | 30854697 | 30854756 | 52719  | chr9:030854697-030854756 | 0.513384  | 0.783343 | -1.022818 | -0.39763463  |
| A_16_P18599070 | 9 | 30898283 | 30898342 | 27265  | chr9:030898283-030898342 | 0.336825  | 0.802194 | -1.016192 | -0.38116395  |
| A_16_P02088872 | 9 | 30923127 | 30923186 | 132158 | chr9:030923127-030923186 | 1.20308   | 1.520744 | -0.057069 | 0.5680698    |
| A_16_P18599203 | 9 | 30958682 | 30958741 | 80934  | chr9:030958682-030958741 | 0.715713  | 1.049754 | -0.90314  | -0.26811743  |
| A_16_P02088940 | 9 | 30982433 | 30982492 | 182100 | chr9:030982433-030982492 | 0.855094  | 1.0649   | -0.558439 | 0.26283723   |
| A_14_P135246   | 9 | 31013099 | 31013158 | 189989 | chr9:031013099-031013158 | 0.700823  | 0.993024 | -0.31183  | 0.10098245   |
| A_16_P18599416 | 9 | 31056431 | 31056490 | 7424   | chr9:031056431-031056490 | 0.81921   | 1.048029 | -0.697295 | -0.04462719  |
| A_16_P02089086 | 9 | 31094145 | 31094204 | 197304 | chr9:031094145-031094204 | 1.316713  | 1.229893 | -0.433542 | 0.42007166   |
| A_16_P18599583 | 9 | 31134867 | 31134926 | 57695  | chr9:031134867-031134926 | 1.065008  | 1.216314 | -0.23558  | 0.16429654   |
| A_14_P139251   | 9 | 31181538 | 31181597 | 206960 | chr9:031181538-031181597 | 0.879023  | 0.991558 | -0.268943 | 0.2897979    |
| A_16_P18599743 | 9 | 31208658 | 31208717 | 236300 | chr9:031208658-031208717 | 0.398871  | 0.720439 | -1.031514 | -0.46875787  |
| A_16_P38697268 | 9 | 31226755 | 31226814 | 227413 | chr9:031226755-031226814 | 0.284357  | 0.5314   | -1.242218 | -0.4614756   |
| A_16_P38697299 | 9 | 31239564 | 31239623 | 71734  | chr9:031239564-031239623 | 0.611541  | 0.962716 | -0.660388 | -0.112778306 |
| A_16_P02089288 | 9 | 31252944 | 31253003 | 9496   | chr9:031252944-031253003 | 0.111861  | 0.382149 | -1.513201 | -1.0491626   |
| A_16_P18599861 | 9 | 31260683 | 31260742 | 165653 | chr9:031260683-031260742 | 0.44522   | 0.762549 | -1.062397 | -0.54721045  |



|                |   |          |          |        |                          |           |           |           |              |
|----------------|---|----------|----------|--------|--------------------------|-----------|-----------|-----------|--------------|
| A_16_P38697389 | 9 | 31275128 | 31275187 | 98828  | chr9:031275128-031275187 | 0.748734  | 0.803926  | -0.757571 | -0.3096655   |
| A_16_P18599923 | 9 | 31297979 | 31298038 | 24496  | chr9:031297979-031298038 | 0.519576  | 0.869468  | -0.920287 | -0.15599194  |
| A_16_P38697488 | 9 | 31331152 | 31331211 | 39938  | chr9:031331152-031331211 | 0.597639  | 0.942874  | -0.724293 | -0.24724331  |
| A_14_P114603   | 9 | 31357313 | 31357372 | 44444  | chr9:031357313-031357372 | 0.993079  | 1.247276  | -0.291355 | 0.27581364   |
| A_16_P18600101 | 9 | 31372245 | 31372304 | 104726 | chr9:031372245-031372304 | 0.748556  | 1.011177  | -0.98954  | -0.2430577   |
| A_16_P18600193 | 9 | 31408398 | 31408457 | 235853 | chr9:031408398-031408457 | 0.495234  | 0.679905  | -1.098135 | -0.46871376  |
| A_16_P38697757 | 9 | 31429061 | 31429120 | 156887 | chr9:031429061-031429120 | 0.692002  | 1.163135  | -0.642003 | -0.015000209 |
| A_16_P38697805 | 9 | 31448495 | 31448554 | 94343  | chr9:031448495-031448554 | 0.726621  | 0.942479  | -0.696272 | -0.15278709  |
| A_14_P133601   | 9 | 31463840 | 31463899 | 151453 | chr9:031463840-031463899 | 0.615694  | 0.971579  | -0.734702 | -0.156239    |
| A_16_P18600384 | 9 | 31485367 | 31485426 | 210362 | chr9:031485367-031485426 | 0.617049  | 0.881749  | -0.878391 | -0.26344976  |
| A_16_P18600398 | 9 | 31492861 | 31492920 | 123831 | chr9:031492861-031492920 | 1.099457  | 1.215051  | -0.221756 | 0.2631358    |
| A_16_P02089638 | 9 | 31500540 | 31500599 | 85128  | chr9:031500540-031500599 | 0.424472  | 0.75014   | -1.191798 | -0.6024718   |
| A_16_P18600431 | 9 | 31511170 | 31511229 | 218477 | chr9:031511170-031511229 | 0.675528  | 1.06746   | -0.782778 | -0.06872171  |
| A_16_P18600463 | 9 | 31523222 | 31523281 | 88274  | chr9:031523222-031523281 | 0.966452  | 1.136086  | -0.496944 | 0.16329095   |
| A_16_P02089678 | 9 | 31532873 | 31532932 | 162514 | chr9:031532873-031532932 | 1.092128  | 1.30079   | -0.363157 | 0.26401907   |
| A_16_P02089716 | 9 | 31557865 | 31557924 | 160962 | chr9:031557865-031557924 | 1.025761  | 1.294274  | -0.346911 | 0.16106546   |
| A_16_P38698105 | 9 | 31576295 | 31576354 | 70762  | AK124280                 | 0.481352  | 0.837711  | -0.704625 | -0.27948225  |
| A_16_P18600646 | 9 | 31589010 | 31589069 | 200532 | AK124280                 | 0.867763  | 1.226958  | -0.434376 | 0.20839983   |
| A_16_P38698169 | 9 | 31597599 | 31597658 | 97711  | AK124280                 | 0.633072  | 1.017681  | -0.742308 | -0.124454945 |
| A_16_P18600694 | 9 | 31605752 | 31605811 | 62161  | AK124280                 | 0.840986  | 1.305502  | -0.492464 | 0.10882622   |
| A_16_P18600726 | 9 | 31617795 | 31617854 | 218888 | AK124280                 | 0.660749  | 1.046155  | -0.781096 | 0.03866367   |
| A_16_P02089852 | 9 | 31632000 | 31632059 | 103399 | AK124280                 | 1.268407  | 1.525314  | -0.142979 | 0.40226585   |
| A_16_P38698302 | 9 | 31644235 | 31644294 | 109014 | AK124280                 | 0.344557  | 0.621407  | -1.019604 | -0.5711196   |
| A_16_P18600856 | 9 | 31664449 | 31664508 | 90318  | AK124280                 | 0.404041  | 0.788765  | -1.175289 | -0.5257494   |
| A_16_P38698405 | 9 | 31681989 | 31682048 | 187118 | AK124280                 | 0.65033   | 1.033461  | -0.816636 | -0.07234651  |
| A_16_P02089971 | 9 | 31702883 | 31702942 | 4633   | AK124280                 | 1.360717  | 1.56584   | 0.132267  | 0.7134594    |
| A_14_P101829   | 9 | 31713924 | 31713983 | 105793 | AK124280                 | 0.481482  | 0.504597  | -1.084683 | -0.2672114   |
| A_16_P18601044 | 9 | 31733442 | 31733501 | 76615  | AK124280                 | 0.795536  | 1.105365  | -0.640332 | -0.10945907  |
| A_16_P18601144 | 9 | 31788994 | 31789053 | 201180 | chr9:031788994-031789053 | 0.677228  | 1.107497  | -1.331356 | -0.066370934 |
| A_16_P18601231 | 9 | 31829311 | 31829370 | 216892 | chr9:031829311-031829370 | 0.541965  | 1.038656  | -0.694612 | -0.30965787  |
| A_16_P38698772 | 9 | 31860094 | 31860153 | 43356  | chr9:031860094-031860153 | 0.784526  | 0.993865  | -1.033834 | -0.24096388  |
| A_14_P136706   | 9 | 31881415 | 31881474 | 152684 | chr9:031881415-031881474 | -0.467867 | -0.002461 | -1.980525 | -1.5191152   |
| A_16_P38698894 | 9 | 31913915 | 31913974 | 34684  | chr9:031913915-031913974 | 0.613286  | 1.14871   | -0.725049 | -0.14632899  |
| A_16_P18601437 | 9 | 31933737 | 31933796 | 137218 | chr9:031933737-031933796 | 0.373432  | 0.828012  | -1.061582 | -0.5331305   |
| A_16_P18601490 | 9 | 31976262 | 31976321 | 87644  | chr9:031976262-031976321 | 0.171336  | 0.354989  | -1.355029 | -0.75759166  |
| A_14_P104494   | 9 | 32020469 | 32020528 | 216334 | chr9:032020469-032020528 | 0.884072  | 1.111735  | -0.267451 | 0.07433842   |
| A_16_P18601652 | 9 | 32063962 | 32064021 | 133907 | chr9:032063962-032064021 | 0.509027  | 0.990752  | -0.759281 | -0.28560227  |
| A_16_P18601710 | 9 | 32084190 | 32084249 | 211103 | chr9:032084190-032084249 | 0.662306  | 0.794742  | -0.715821 | -0.16666421  |
| A_16_P38699284 | 9 | 32131856 | 32131915 | 145190 | chr9:032131856-032131915 | 0.509944  | 0.951849  | -0.865951 | -0.17504379  |
| A_16_P02090480 | 9 | 32162607 | 32162666 | 56160  | chr9:032162607-032162666 | 0.85901   | 1.309328  | -0.514169 | -0.032394886 |
| A_14_P120414   | 9 | 32195770 | 32195829 | 196354 | chr9:032195770-032195829 | 0.309391  | 0.595034  | -0.517754 | -0.32318342  |
| A_16_P18601982 | 9 | 32241230 | 32241289 | 85412  | chr9:032241230-032241289 | 1.126021  | 1.60721   | -0.043915 | 0.53146636   |
| A_16_P18602081 | 9 | 32283241 | 32283300 | 52655  | chr9:032283241-032283300 | 1.15843   | 1.535046  | -0.092135 | 0.58344615   |
| A_16_P02090644 | 9 | 32310976 | 32311035 | 163006 | chr9:032310976-032311035 | 0.914865  | 1.314578  | -0.368685 | 0.15144451   |
| A_16_P18602166 | 9 | 32331957 | 32332016 | 36062  | chr9:032331957-032332016 | 1.163538  | 1.572007  | -0.359953 | 0.3905605    |
| A_16_P38699691 | 9 | 32349951 | 32350010 | 63258  | chr9:032349951-032350010 | 0.744087  | 0.997117  | -0.899664 | -0.11474672  |
| A_16_P38699702 | 9 | 32358928 | 32358987 | 79280  | chr9:032358928-032358987 | 0.7425    | 1.01282   | -0.810501 | -0.1926375   |
| A_14_P201522   | 9 | 32374264 | 32374323 | 151893 | chr9:032374264-032374323 | 0.576005  | 0.835823  | -0.861256 | -0.48277003  |
| A_14_P102783   | 9 | 32375919 | 32375966 | 187270 | ACO1                     | 0.839861  | 1.109052  | 0.337978  | 0.6565035    |
| A_16_P18602285 | 9 | 32385746 | 32385805 | 1432   | ACO1                     | 0.892251  | 1.06377   | -0.516398 | 0.1686286    |
| A_16_P02090766 | 9 | 32398614 | 32398673 | 147394 | ACO1                     | 0.936882  | 1.401693  | -0.488923 | 0.044151023  |
| A_16_P02090785 | 9 | 32408146 | 32408205 | 29513  | ACO1                     | 0.960892  | 1.497426  | -0.506669 | 0.26785144   |
| A_14_P138680   | 9 | 32415365 | 32415424 | 7732   | ACO1                     | 1.13E-04  | 0.337619  | -1.573132 | -1.0429847   |
| A_16_P02090813 | 9 | 32423786 | 32423845 | 17784  | ACO1                     | 0.69153   | 1.15366   | -0.569121 | -0.030496687 |
| A_16_P18602432 | 9 | 32429770 | 32429829 | 187128 | ACO1                     | 0.87515   | 1.10197   | -0.70544  | -0.046717063 |
| A_16_P18602453 | 9 | 32440560 | 32440619 | 43771  | ACO1                     | 1.099455  | 1.527932  | -0.313272 | 0.45197144   |
| A_14_P136455   | 9 | 32446057 | 32446116 | 219938 | DDX58                    | 1.045523  | 1.550308  | -0.204867 | 0.44363964   |
| A_16_P18602496 | 9 | 32456250 | 32456309 | 24617  | DDX58                    | 0.932117  | 1.342697  | -0.437972 | 0.13419074   |
| A_16_P38700021 | 9 | 32463040 | 32463099 | 66772  | DDX58                    | 0.276078  | 0.737156  | -1.170875 | -0.638819    |
| A_16_P18602530 | 9 | 32471409 | 32471468 | 142106 | DDX58                    | 0.809599  | 1.002477  | -0.481844 | -0.089565724 |
| A_16_P18602569 | 9 | 32482509 | 32482568 | 10648  | DDX58                    | 1.063273  | 1.529189  | -0.200687 | 0.5149013    |
| A_16_P38700096 | 9 | 32490919 | 32490978 | 88867  | DDX58                    | 0.981215  | 1.370178  | -0.139363 | 0.15425514   |
| A_16_P18602591 | 9 | 32496630 | 32496689 | 148501 | DDX58                    | 0.603035  | 0.994058  | -0.955483 | -0.43171102  |
| A_16_P38700118 | 9 | 32505542 | 32505601 | 55594  | DDX58                    | 0.987397  | 1.377842  | -0.433676 | 0.16702166   |
| A_14_P129780   | 9 | 32514411 | 32514470 | 163655 | DDX58                    | 0.646651  | 0.992094  | -0.711919 | -0.27627867  |
| A_16_P18602614 | 9 | 32521288 | 32521347 | 60389  | chr9:032521288-032521347 | 1.079496  | 1.349164  | -0.369918 | 0.27220947   |
| A_16_P18602626 | 9 | 32527229 | 32527288 | 10656  | chr9:032527229-032527288 | 1.417049  | 1.767818  | 0.072708  | 0.66233516   |
| A_16_P38700163 | 9 | 32534144 | 32534203 | 72635  | TOPORS                   | 0.743521  | 0.984242  | -0.698034 | -0.1254408   |
| A_14_P126475   | 9 | 32538760 | 32538819 | 9696   | TOPORS                   | 1.156692  | 1.366847  | -0.308254 | 0.18292293   |
| A_14_P107037   | 9 | 32541259 | 32541318 | 131994 | TOPORS                   | 0.665623  | 1.064101  | -0.854028 | -0.21696684  |
| A_14_P135984   | 9 | 32548887 | 32548946 | 90556  | NDUFB6                   | 0.718778  | 1.112232  | -0.734668 | -0.23631409  |
| A_16_P02090981 | 9 | 32552371 | 32552430 | 158796 | NDUFB6                   | 1.145152  | 1.592161  | 0.049647  | 0.5881773    |
| A_16_P18602707 | 9 | 32556055 | 32556110 | 22526  | NDUFB6                   | 0.80456   | 1.268613  | -0.516609 | 0.11983739   |

|                |   |          |          |        |                          |          |           |           |              |
|----------------|---|----------|----------|--------|--------------------------|----------|-----------|-----------|--------------|
| A_16_P02090992 | 9 | 32562552 | 32562611 | 33291  | NDUFB6                   | 1.133097 | 1.214035  | -0.318273 | 0.28280967   |
| A_16_P38700253 | 9 | 32572118 | 32572177 | 20633  | chr9:032572118-032572177 | 1.296205 | 1.607179  | -0.095676 | 0.5136323    |
| A_16_P18602755 | 9 | 32579683 | 32579742 | 194339 | chr9:032579683-032579742 | 0.386164 | 0.788038  | -1.011024 | -0.3287549   |
| A_16_P18602774 | 9 | 32591721 | 32591780 | 72579  | chr9:032591721-032591780 | 1.099684 | 1.481325  | -0.201015 | 0.38545382   |
| A_16_P18602791 | 9 | 32598689 | 32598748 | 190071 | chr9:032598689-032598748 | 0.265411 | 0.706792  | -1.244099 | -0.65821075  |
| A_16_P38700335 | 9 | 32607736 | 32607795 | 36327  | chr9:032607736-032607795 | 0.174723 | 0.680872  | -1.359442 | -0.66084725  |
| A_16_P02091055 | 9 | 32614635 | 32614694 | 217774 | chr9:032614635-032614694 | 1.132032 | 1.543795  | -0.185199 | 0.37525994   |
| A_14_P108455   | 9 | 32623070 | 32623127 | 99283  | TAF1L                    | 1.384173 | 1.8337    | 0.17913   | 0.6720832    |
| A_16_P38700386 | 9 | 32631607 | 32631666 | 87481  | AK091653                 | 1.232603 | 1.596892  | -0.134248 | 0.16638719   |
| A_16_P18602886 | 9 | 32639296 | 32639355 | 228650 | chr9:032639296-032639355 | 0.775625 | 1.163333  | -0.633397 | -0.24744081  |
| A_16_P18602901 | 9 | 32652137 | 32652196 | 138351 | chr9:032652137-032652196 | 0.850844 | 1.20091   | -0.52929  | -0.14831302  |
| A_16_P38700467 | 9 | 32665006 | 32665065 | 178186 | chr9:032665006-032665065 | 0.885585 | 1.226385  | -0.554342 | 0.079380855  |
| A_16_P02091127 | 9 | 32680591 | 32680650 | 173623 | chr9:032680591-032680650 | 0.995179 | 1.295072  | -0.534934 | 0.054841504  |
| A_16_P02091155 | 9 | 32696671 | 32696730 | 118506 | chr9:032696671-032696730 | 1.398087 | 1.749102  | -0.092443 | 0.7068632    |
| A_16_P18603030 | 9 | 32711784 | 32711843 | 100168 | chr9:032711784-032711843 | 0.845696 | 1.108427  | -0.604264 | -0.12800103  |
| A_16_P38700602 | 9 | 32730111 | 32730170 | 115744 | chr9:032730111-032730170 | 0.937288 | 1.499092  | -0.527526 | 0.1440033    |
| A_16_P02091219 | 9 | 32749696 | 32749755 | 31627  | chr9:032749696-032749755 | 0.736113 | 1.169212  | -0.796071 | -0.26524436  |
| A_16_P18603139 | 9 | 32757415 | 32757474 | 94920  | chr9:032757415-032757474 | 1.070056 | 1.438075  | -0.391681 | 0.2937766    |
| A_16_P38700688 | 9 | 32769204 | 32769263 | 157388 | chr9:032769204-032769263 | 0.685663 | 0.953928  | -0.816896 | -0.32279724  |
| A_16_P38700711 | 9 | 32777173 | 32777232 | 20319  | LOC401498                | 0.94934  | 1.22095   | -0.522244 | -0.002699122 |
| A_16_P02091268 | 9 | 32784055 | 32784114 | 146597 | chr9:032784055-032784114 | 1.007736 | 1.197027  | -0.633279 | -0.010610044 |
| A_16_P18603211 | 9 | 32792206 | 32792265 | 87657  | chr9:032792206-032792265 | 1.195383 | 1.393703  | -0.359105 | 0.27531996   |
| A_16_P18603224 | 9 | 32803501 | 32803560 | 132140 | chr9:032803501-032803560 | 0.418266 | 0.739815  | 0.049321  | 0.7487055    |
| A_14_P139980   | 9 | 32834623 | 32834682 | 235989 | chr9:032834623-032834682 | 1.09965  | 1.442746  | -0.328451 | 0.38984373   |
| A_16_P02091385 | 9 | 32827237 | 32827296 | 46786  | chr9:032827237-032827296 | 1.016309 | 1.461803  | -0.441117 | 0.18677777   |
| A_16_P18603472 | 9 | 32894286 | 32894345 | 170523 | chr9:032894286-032894345 | 1.229042 | 1.569547  | -0.456791 | 0.59814537   |
| A_16_P02091477 | 9 | 32929464 | 32929523 | 134140 | chr9:032929464-032929523 | 0.754815 | 1.117086  | -0.855968 | -0.19672483  |
| A_16_P38701115 | 9 | 32945146 | 32945205 | 66082  | AK124533                 | 1.288979 | 1.556231  | -0.166112 | 0.41217637   |
| A_16_P02091500 | 9 | 32955637 | 32955696 | 152633 | chr9:032955637-032955696 | 0.780018 | 1.143185  | -0.74521  | -0.20715272  |
| A_16_P18603629 | 9 | 32962547 | 32962606 | 165577 | chr9:032962547-032962606 | 0.767617 | 1.194058  | -0.536051 | -0.19407645  |
| A_16_P02091526 | 9 | 32966827 | 32966886 | 55571  | APTX                     | 0.823196 | 1.155203  | -0.609389 | -0.41449356  |
| A_14_P202089   | 9 | 32972795 | 32972853 | 101930 | APTX                     | 1.112133 | 1.423845  | -0.238403 | 0.27054346   |
| A_14_P121977   | 9 | 32978063 | 32978122 | 91474  | APTX                     | 0.997879 | 1.285134  | -0.413686 | 0.1143325    |
| A_16_P18603689 | 9 | 32986579 | 32986638 | 166873 | APTX                     | 1.154418 | 1.48511   | -0.312657 | 0.26088706   |
| A_16_P02091562 | 9 | 32992776 | 32992835 | 129868 | chr9:032992776-032992835 | 1.229135 | 1.496621  | -0.002872 | 0.36820167   |
| A_16_P38701251 | 9 | 33002120 | 33002179 | 97335  | chr9:033002120-033002179 | 1.013064 | 1.4537    | -0.492962 | 0.06986304   |
| A_16_P38701264 | 9 | 33006369 | 33006428 | 71269  | chr9:033006369-033006428 | 1.091697 | 1.435842  | -0.258344 | 0.206548     |
| A_16_P02091584 | 9 | 33013791 | 33013850 | 181776 | chr9:033013791-033013850 | 1.051427 | 1.396676  | -0.341127 | 0.24322103   |
| A_14_P102776   | 9 | 33019002 | 33019061 | 161800 | DNAJA1                   | 1.20466  | 1.447431  | -0.069423 | 0.39412266   |
| A_14_P108970   | 9 | 33025827 | 33025886 | 213020 | DNAJA1                   | 1.623564 | 1.864461  | 0.291811  | 0.8285891    |
| A_14_P106115   | 9 | 33027699 | 33027758 | 42063  | DNAJA1                   | 1.197738 | 1.480417  | -0.342521 | 0.29514116   |
| A_14_P137305   | 9 | 33036145 | 33036204 | 239652 | SMU1                     | 0.941678 | 1.266876  | -0.669261 | -0.14927629  |
| A_16_P02091634 | 9 | 33042775 | 33042834 | 7740   | SMU1                     | 0.490337 | 0.794232  | -0.937723 | -0.43983996  |
| A_16_P38701404 | 9 | 33050557 | 33050616 | 85514  | SMU1                     | 0.862798 | 1.17104   | -0.556168 | -0.023035094 |
| A_16_P38701430 | 9 | 33061478 | 33061537 | 9417   | SMU1                     | 1.220655 | 1.482097  | -0.070696 | 0.322533     |
| A_14_P100153   | 9 | 33066240 | 33066291 | 222127 | SMU1                     | 1.811039 | 2.035186  | 0.658919  | 1.0474653    |
| A_16_P02091682 | 9 | 33074788 | 33074847 | 53557  | chr9:033074788-033074847 | 1.708026 | 1.810636  | 0.292757  | 0.7117016    |
| A_16_P38701475 | 9 | 33090287 | 33090346 | 149732 | chr9:033090287-033090346 | 1.154558 | 1.509288  | -0.221477 | 0.20458391   |
| A_16_P02091697 | 9 | 33097359 | 33097414 | 68651  | BC045773                 | 1.453414 | -0.019376 | 0.134292  | 0.5942411    |
| A_16_P38701521 | 9 | 33103000 | 33103059 | 122487 | B4GALT1                  | 0.893498 | 1.325194  | -0.458889 | 0.09357345   |
| A_14_P117645   | 9 | 33114815 | 33114874 | 102843 | B4GALT1                  | 1.062836 | 1.595724  | -0.335251 | 0.25945717   |
| A_16_P02091744 | 9 | 33119975 | 33120034 | 2676   | B4GALT1                  | 1.215391 | 1.647254  | -0.201914 | 0.45850915   |
| A_16_P02091756 | 9 | 33126111 | 33126170 | 205736 | B4GALT1                  | 0.976029 | 1.423533  | -0.538039 | 0.057920948  |
| A_16_P18604047 | 9 | 33133742 | 33133801 | 154135 | B4GALT1                  | 1.203589 | 1.223908  | -0.220766 | -0.082268566 |
| A_16_P18604066 | 9 | 33144643 | 33144702 | 224547 | B4GALT1                  | 1.4787   | 1.804192  | 0.143462  | 0.5874754    |
| A_14_P119243   | 9 | 33155416 | 33155475 | 3985   | B4GALT1                  | 1.348366 | 1.742524  | 0.010014  | 0.6035248    |
| A_16_P18604126 | 9 | 33168488 | 33168547 | 21290  | chr9:033168488-033168547 | 1.822642 | 1.54488   | -0.08924  | 0.48603696   |
| A_16_P18604180 | 9 | 33194393 | 33194452 | 120960 | chr9:033194393-033194452 | 1.385339 | 1.111088  | -0.620178 | -0.076450944 |
| A_16_P18604215 | 9 | 33209274 | 33209333 | 141845 | chr9:033209274-033209333 | 1.489811 | 1.222866  | -0.575157 | -0.11564654  |
| A_16_P18604236 | 9 | 33215728 | 33215787 | 168229 | chr9:033215728-033215787 | 1.998004 | 1.652865  | -0.131451 | 0.5616996    |
| A_16_P38701836 | 9 | 33227011 | 33227070 | 45861  | chr9:033227011-033227070 | 1.759185 | 1.514299  | -0.212726 | 0.47991538   |
| A_16_P02091898 | 9 | 33232155 | 33232210 | 202006 | SPINK4                   | 1.320928 | 1.260395  | 0.064476  | 0.5940546    |
| A_14_P139968   | 9 | 33238412 | 33238467 | 177994 | SPINK4                   | 1.986831 | 1.682234  | -0.012966 | 0.4070051    |
| A_14_P136108   | 9 | 33245269 | 33245317 | 242523 | BAG1                     | 2.059919 | 2.029667  | 0.598398  | 0.9694859    |
| A_16_P38701909 | 9 | 33251034 | 33251093 | 226560 | BAG1                     | 1.37487  | 1.286547  | -0.711195 | -0.38292247  |
| A_14_P132950   | 9 | 33257864 | 33257923 | 1611   | CHMP5                    | 1.585169 | 1.48389   | -0.127538 | 0.3492415    |
| A_16_P38701960 | 9 | 33266360 | 33266419 | 195414 | CHMP5                    | 1.51066  | 1.344144  | -0.403321 | 0.071544304  |
| A_16_P02091974 | 9 | 33274577 | 33274636 | 209120 | chr9:033274577-033274636 | 1.888208 | 1.566798  | -0.261558 | 0.4441347    |
| A_16_P38702019 | 9 | 33284346 | 33284405 | 57552  | NFX1                     | 0.868287 | 1.356695  | -0.577269 | -0.070807725 |
| A_14_P105756   | 9 | 33293233 | 33293292 | 42189  | NFX1                     | 0.937712 | 1.23944   | -0.450686 | -0.17426208  |
| A_16_P18604482 | 9 | 33303591 | 33303650 | 119771 | NFX1                     | 1.42665  | 1.76424   | -0.03023  | 0.5099056    |
| A_16_P02092026 | 9 | 33308882 | 33308941 | 229303 | NFX1                     | 1.047497 | 1.379846  | -0.243128 | 0.07931263   |
| A_16_P02092033 | 9 | 33318641 | 33318700 | 47895  | NFX1                     | 1.289436 | 1.645656  | -0.053487 | 0.31818557   |

|                |   |          |          |        |                          |           |           |           |              |
|----------------|---|----------|----------|--------|--------------------------|-----------|-----------|-----------|--------------|
| A_16_P38702123 | 9 | 33328418 | 33328477 | 151342 | NFX1                     | 0.832193  | 1.290334  | -0.597477 | 0.03128819   |
| A_14_P126317   | 9 | 33337012 | 33337070 | 76722  | NFX1                     | 1.120824  | 1.554348  | -0.33214  | 0.27258363   |
| A_16_P02092060 | 9 | 33344135 | 33344194 | 8506   | NFX1                     | 1.208116  | 1.485577  | -0.176852 | 0.25979808   |
| A_16_P18604577 | 9 | 33354826 | 33354885 | 141879 | NFX1                     | 0.978894  | 1.239687  | -0.632622 | -0.07671535  |
| A_16_P02092085 | 9 | 33360763 | 33360821 | 68284  | NFX1                     | 1.136864  | 1.682756  | -0.214292 | 0.19631873   |
| A_16_P02092099 | 9 | 33368273 | 33368325 | 59688  | chr9:033368273-033368325 | 1.797895  | 1.956612  | 0.683418  | 1.0616028    |
| A_16_P02092107 | 9 | 33374723 | 33374771 | 45525  | chr9:033374723-033374771 | 0.99858   | 1.34355   | 0.024891  | 0.40534574   |
| A_14_P138615   | 9 | 33394021 | 33394066 | 183828 | chr9:033394021-033394066 | 1.244937  | 1.629422  | 0.554447  | 0.7423109    |
| A_16_P18604687 | 9 | 33400753 | 33400804 | 91760  | chr9:033400753-033400804 | 0.89378   | 1.365582  | 0.237338  | 0.5695379    |
| A_16_P02092128 | 9 | 33407831 | 33407887 | 53211  | chr9:033407831-033407887 | 1.016398  | 0.901562  | 0.2248    | 0.22556762   |
| A_16_P38702330 | 9 | 33412574 | 33412633 | 48437  | chr9:033412574-033412633 | 0.848402  | 1.273853  | -0.030848 | -0.27476698  |
| A_16_P38702342 | 9 | 33417475 | 33417524 | 133230 | chr9:033417475-033417524 | 1.166681  | 1.582606  | 0.397199  | 0.52371323   |
| A_16_P02092146 | 9 | 33424021 | 33424080 | 14605  | chr9:033424021-033424080 | 1.09923   | 1.487314  | 0.521578  | 0.32045168   |
| A_14_P113876   | 9 | 33431267 | 33431326 | 13851  | AQP3                     | 1.442901  | 1.741952  | 0.752706  | 0.51962423   |
| A_16_P02092172 | 9 | 33436925 | 33436984 | 232563 | AQP3                     | 1.134057  | 1.569327  | 0.496056  | 0.529274     |
| A_16_P02092180 | 9 | 33442676 | 33442731 | 43596  | AK128272                 | 1.071768  | 1.383402  | -0.462582 | 0.14036646   |
| A_16_P18604817 | 9 | 33448496 | 33448555 | 206193 | chr9:033448496-033448555 | 1.325929  | 1.693748  | 0.060012  | 0.37492546   |
| A_16_P02092197 | 9 | 33451584 | 33451643 | 20795  | NOL6                     | 0.992178  | 1.434091  | -0.377292 | 0.2112851    |
| A_14_P125761   | 9 | 33456965 | 33457009 | 94386  | NOL6                     | 1.099258  | 1.451797  | 0.471468  | 0.8525078    |
| A_14_P200911   | 9 | 33463213 | 33463272 | 129097 | NOL6                     | 0.980885  | 1.359832  | -0.575327 | 0.011154994  |
| A_16_P02092228 | 9 | 33468480 | 33468539 | 17254  | chr9:033468480-033468539 | 0.99984   | 1.463689  | -0.388594 | 0.17546998   |
| A_16_P18604870 | 9 | 33474125 | 33474184 | 169401 | chr9:033474125-033474184 | 1.440809  | 1.778676  | 0.363073  | 0.6141968    |
| A_16_P02092236 | 9 | 33485659 | 33485718 | 194964 | chr9:033485659-033485718 | 0.599659  | 0.967896  | -0.535207 | -0.15350547  |
| A_16_P02092246 | 9 | 33492692 | 33492751 | 168527 | chr9:033492692-033492751 | -0.072774 | 0.447393  | -0.97681  | -0.7174585   |
| A_16_P02092254 | 9 | 33503496 | 33503555 | 237643 | chr9:033503496-033503555 | 1.063116  | 1.501228  | -0.152931 | 0.42886174   |
| A_16_P02092259 | 9 | 33514238 | 33514282 | 63301  | chr9:033514238-033514282 | 0.822826  | 0.696626  | 0.030762  | 0.47146925   |
| A_16_P02092271 | 9 | 33545000 | 33545059 | 38608  | BC009440                 | 0.354703  | -0.543495 | -0.11579  | 0.362073     |
| A_16_P38702775 | 9 | 33562679 | 33562738 | 225588 | chr9:033562679-033562738 | 0.408631  | 0.738727  | -0.559263 | 0.12364471   |
| A_16_P02092278 | 9 | 33598877 | 33598934 | 72383  | chr9:033598877-033598934 | 1.205864  | 1.666999  | -0.127171 | 0.6925302    |
| A_16_P02092290 | 9 | 33611015 | 33611072 | 75313  | chr9:033611015-033611072 | 1.052825  | 1.15847   | -0.361041 | 0.13579628   |
| A_16_P02092300 | 9 | 33621117 | 33621176 | 52425  | chr9:033621117-033621176 | 0.78907   | 1.464775  | -0.615015 | -0.05575168  |
| A_16_P02092316 | 9 | 33630163 | 33630222 | 221273 | chr9:033630163-033630222 | 1.064323  | 1.516989  | -0.403935 | 0.37917382   |
| A_16_P02092319 | 9 | 33636818 | 33636877 | 11782  | chr9:033636818-033636877 | 0.833892  | 1.134225  | -0.584532 | -0.019212157 |
| A_16_P02092341 | 9 | 33654927 | 33654986 | 24033  | chr9:033654927-033654986 | 1.113804  | 1.526132  | -0.26177  | 0.31193393   |
| A_16_P02092345 | 9 | 33666369 | 33666428 | 189819 | BC038293                 | 0.883221  | 1.222466  | -0.668747 | -0.015462443 |
| A_16_P02092352 | 9 | 33676983 | 33677042 | 127843 | chr9:033676983-033677042 | 1.273755  | 1.714761  | 0.023404  | 0.76138127   |
| A_16_P02092362 | 9 | 33683553 | 33683612 | 162956 | chr9:033683553-033683612 | 1.330704  | 1.678099  | -0.118011 | 0.5858073    |
| A_16_P18605386 | 9 | 33705100 | 33705159 | 182162 | chr9:033705100-033705159 | 0.897275  | 1.49814   | -0.402069 | 0.3452265    |
| A_16_P38703098 | 9 | 33722828 | 33722887 | 222091 | chr9:033722828-033722887 | 1.159999  | 1.476688  | -0.082613 | 0.30752388   |
| A_16_P02092395 | 9 | 33738074 | 33738133 | 6613   | chr9:033738074-033738133 | 1.280168  | 1.539168  | 0.552168  | 0.72663254   |
| A_14_P134218   | 9 | 33745689 | 33745748 | 239600 | X71345                   | 0.698844  | 1.129653  | -0.119005 | -0.063586    |
| A_16_P02092407 | 9 | 33757107 | 33757166 | 145659 | X71345                   | 0.394069  | 0.948671  | -1.145341 | -0.66483253  |
| A_16_P38703158 | 9 | 33762934 | 33762985 | 15858  | X71345                   | 0.968959  | 1.28745   | 0.081394  | 0.043595523  |
| A_16_P02092412 | 9 | 33767785 | 33767844 | 97256  | X71345                   | 1.03443   | 1.392816  | -0.243974 | 0.20662174   |
| A_16_P02092413 | 9 | 33773609 | 33773668 | 101650 | X71345                   | 0.300453  | 0.422852  | -1.498008 | -0.6165129   |
| A_14_P124089   | 9 | 33778378 | 33778437 | 57383  | X71345                   | 1.10151   | 1.279687  | 0.240835  | 0.5380734    |
| A_16_P02092421 | 9 | 33782344 | 33782403 | 9057   | X71345                   | 0.595823  | 1.466824  | -0.759536 | -0.58070403  |
| A_16_P02092429 | 9 | 33791073 | 33791122 | 162645 | chr9:033791073-033791122 | 1.47421   | 1.567146  | 0.090226  | 0.42284083   |
| A_16_P02092432 | 9 | 33803335 | 33803394 | 21219  | chr9:033803335-033803394 | 1.030721  | 1.491282  | -0.266019 | 0.3926087    |
| A_14_P132380   | 9 | 33809009 | 33809068 | 92220  | UBE2R2                   | 1.244436  | 1.462881  | -0.136359 | 0.425993     |
| A_16_P18605583 | 9 | 33813991 | 33814050 | 84020  | UBE2R2                   | 0.911663  | 1.21505   | -0.700046 | -0.2048172   |
| A_16_P38703282 | 9 | 33819731 | 33819790 | 12925  | UBE2R2                   | 1.246372  | 1.585512  | -0.204138 | 0.21240482   |
| A_16_P38703292 | 9 | 33831855 | 33831914 | 147065 | UBE2R2                   | 1.307693  | 1.606978  | -0.281032 | 0.34500706   |
| A_16_P18605617 | 9 | 33843650 | 33843709 | 170251 | UBE2R2                   | 1.224291  | 1.516727  | -0.155707 | 0.43321422   |
| A_14_P116012   | 9 | 33852241 | 33852300 | 112821 | UBE2R2                   | 1.391363  | 1.632929  | 0.076915  | 0.6067313    |
| A_16_P02092483 | 9 | 33861643 | 33861702 | 303    | UBE2R2                   | 0.979725  | 1.360907  | -0.447834 | 0.16020936   |
| A_16_P38703354 | 9 | 33867615 | 33867674 | 73888  | UBE2R2                   | 0.580825  | 1.005693  | -0.914728 | -0.18796346  |
| A_16_P02092492 | 9 | 33876864 | 33876923 | 33035  | UBE2R2                   | 1.123172  | 1.496944  | -0.376781 | 0.25294724   |
| A_16_P38703376 | 9 | 33882249 | 33882308 | 112902 | UBE2R2                   | 0.839321  | 1.046617  | -0.840839 | -0.2974173   |
| A_14_P111916   | 9 | 33890470 | 33890529 | 222855 | UBE2R2                   | 0.773321  | 1.009277  | -0.780918 | -0.31822574  |
| A_16_P18605714 | 9 | 33896674 | 33896733 | 242301 | UBE2R2                   | 1.318188  | 1.478914  | -0.20009  | 0.3899267    |
| A_16_P18605727 | 9 | 33902029 | 33902088 | 66518  | UBE2R2                   | 1.164239  | 1.505779  | -0.103764 | 0.45869857   |
| A_16_P18605748 | 9 | 33909156 | 33909215 | 162582 | UBE2R2                   | 0.938069  | 1.184516  | -0.301478 | 0.06785816   |
| A_16_P02092560 | 9 | 33916648 | 33916705 | 100881 | UBAP2                    | 1.332599  | 1.535746  | -0.323929 | 0.21555772   |
| A_16_P38703504 | 9 | 33924519 | 33924578 | 90073  | UBAP2                    | 1.388363  | 1.573999  | -0.094105 | 0.45126832   |
| A_14_P123714   | 9 | 33931822 | 33931881 | 234908 | UBAP2                    | 0.431059  | 0.673255  | -0.167013 | -0.54863614  |
| A_16_P18605835 | 9 | 33938574 | 33938633 | 240249 | UBAP2                    | 1.142932  | 1.471522  | -0.118147 | 0.3668592    |
| A_16_P38703570 | 9 | 33947741 | 33947800 | 12099  | UBAP2                    | 1.250206  | 1.528579  | -0.092675 | -0.069158405 |
| A_16_P18605879 | 9 | 33953144 | 33953203 | 32799  | UBAP2                    | 1.5407    | 1.745385  | 0.194179  | 0.7217627    |
| A_14_P139249   | 9 | 33961695 | 33961753 | 19750  | UBAP2                    | 0.818479  | 1.12278   | -0.923577 | -0.040266782 |
| A_16_P02092626 | 9 | 33967367 | 33967426 | 38499  | UBAP2                    | 0.794593  | 1.180472  | -0.536802 | -0.10160798  |
| A_16_P38703624 | 9 | 33973248 | 33973307 | 74     | UBAP2                    | 1.236887  | 1.40901   | -0.238563 | 0.43079108   |
| A_16_P18605926 | 9 | 33979106 | 33979165 | 43996  | UBAP2                    | 0.863389  | 1.296994  | -0.630457 | 0.10205441   |

|                |   |          |          |        |                          |          |          |           |              |
|----------------|---|----------|----------|--------|--------------------------|----------|----------|-----------|--------------|
| A_16_P38703664 | 9 | 33988731 | 33988790 | 241412 | UBAP2                    | 0.647209 | 1.060266 | -0.924122 | -0.2339744   |
| A_16_P18605963 | 9 | 33994068 | 33994127 | 62385  | UBAP2                    | 1.060078 | 1.455774 | -0.388408 | 0.049504027  |
| A_16_P18605969 | 9 | 34000861 | 34000920 | 5087   | UBAP2                    | 1.300682 | 1.508518 | -0.172356 | 0.3633201    |
| A_14_P106489   | 9 | 34007112 | 34007171 | 207584 | UBAP2                    | 0.344495 | 0.638283 | -0.697799 | -0.13572687  |
| A_16_P18605996 | 9 | 34014617 | 34014676 | 50146  | UBAP2                    | 1.930573 | 2.584906 | 0.754369  | 1.5899321    |
| A_16_P02092690 | 9 | 34024505 | 34024564 | 236430 | UBAP2                    | 1.131068 | 1.502056 | -0.128227 | 0.30345112   |
| A_16_P18606035 | 9 | 34037834 | 34037893 | 32122  | UBAP2                    | 0.921663 | 1.374507 | -0.30378  | 0.12237172   |
| A_16_P02092707 | 9 | 34043530 | 34043589 | 112673 | chr9:034043530-034043589 | 0.924717 | 1.25522  | -0.566097 | -0.23380694  |
| A_16_P18606056 | 9 | 34049175 | 34049234 | 151138 | chr9:034049175-034049234 | 0.646115 | 0.9101   | -0.919631 | -0.33694303  |
| A_16_P02092711 | 9 | 34054702 | 34054761 | 197187 | chr9:034054702-034054761 | 1.290073 | 1.505281 | -0.071669 | 0.39922255   |
| A_16_P02092717 | 9 | 34060975 | 34061034 | 62710  | chr9:034060975-034061034 | 1.415029 | 1.586118 | 0.0842    | 0.47657645   |
| A_16_P38703798 | 9 | 34069235 | 34069294 | 21805  | chr9:034069235-034069294 | 0.852518 | 1.148442 | -0.582494 | -0.20999807  |
| A_14_P110483   | 9 | 34075974 | 34076033 | 109730 | chr9:034075974-034076033 | 0.810789 | 1.050104 | -0.588928 | 0.01636447   |
| A_16_P02092747 | 9 | 34086687 | 34086746 | 155023 | WDR40A                   | 1.058176 | 1.300956 | -0.553688 | 0.0291043    |
| A_16_P18606131 | 9 | 34093468 | 34093527 | 123169 | WDR40A                   | 1.151451 | 1.526691 | -0.312181 | 0.2510889    |
| A_14_P127668   | 9 | 34105673 | 34105732 | 186036 | WDR40A                   | 0.231325 | 0.77137  | -1.13379  | -0.5883196   |
| A_16_P18606170 | 9 | 34112313 | 34112372 | 38681  | WDR40A                   | 0.5589   | 0.839612 | -0.842808 | -0.4205109   |
| A_16_P18606207 | 9 | 34126427 | 34126486 | 75360  | chr9:034126427-034126486 | 0.686591 | 1.068939 | -0.801813 | -0.29313263  |
| A_16_P02092797 | 9 | 34141415 | 34141474 | 92590  | chr9:034141415-034141474 | 1.147592 | 1.440374 | -0.505085 | -0.28687748  |
| A_16_P18606231 | 9 | 34148278 | 34148337 | 224256 | chr9:034148278-034148337 | 0.335648 | 0.655935 | -1.113568 | -0.49292308  |
| A_16_P18606232 | 9 | 34155943 | 34156002 | 130387 | chr9:034155943-034156002 | 1.572027 | 1.913321 | 0.244909  | 0.9725691    |
| A_14_P102740   | 9 | 34168719 | 34168773 | 64468  | chr9:034168719-034168773 | 1.365111 | 1.65705  | -0.003845 | 0.6389346    |
| A_14_P100730   | 9 | 34177967 | 34178026 | 103811 | UBAP1                    | 0.380482 | 0.675898 | -1.414762 | -0.63670534  |
| A_16_P18606283 | 9 | 34190356 | 34190415 | 45251  | UBAP1                    | 1.34113  | 1.575916 | -0.164489 | 0.4565731    |
| A_16_P18606295 | 9 | 34196594 | 34196653 | 12332  | UBAP1                    | 0.899083 | 1.186978 | -0.742033 | -0.20688301  |
| A_16_P38704065 | 9 | 34210942 | 34211001 | 22285  | UBAP1                    | 1.018108 | 1.259001 | -0.315217 | 0.08989532   |
| A_16_P02092881 | 9 | 34224206 | 34224265 | 77132  | UBAP1                    | 0.681144 | 1.029958 | -0.857863 | -0.14746895  |
| A_16_P02092890 | 9 | 34231160 | 34231218 | 35143  | UBAP1                    | 1.17076  | 1.583555 | -0.007605 | 0.4952629    |
| A_16_P02092900 | 9 | 34238723 | 34238781 | 20948  | UBAP1                    | 1.340849 | 1.703919 | -0.058287 | 0.4779814    |
| A_16_P02092910 | 9 | 34242935 | 34242994 | 241250 | C9orf48                  | 0.586126 | 0.867124 | -1.02482  | -0.38590944  |
| A_14_P114097   | 9 | 34247917 | 34247975 | 164652 | C9orf48                  | 0.772746 | 1.106499 | -0.718836 | -0.37925237  |
| A_16_P18606428 | 9 | 34251581 | 34251640 | 99191  | chr9:034251581-034251640 | 0.606864 | 0.847762 | -0.76359  | -0.3657524   |
| A_16_P18606443 | 9 | 34261228 | 34261287 | 38622  | chr9:034261228-034261287 | 0.827814 | 1.156246 | -0.802339 | 0.11291195   |
| A_16_P02092940 | 9 | 34267524 | 34267583 | 169237 | chr9:034267524-034267583 | 1.021944 | 1.369525 | -0.641323 | 0.045304954  |
| A_16_P38704223 | 9 | 34279555 | 34279614 | 29680  | chr9:034279555-034279614 | 0.846114 | 1.145957 | -0.542684 | 0.028020382  |
| A_16_P38704250 | 9 | 34289909 | 34289968 | 137533 | chr9:034289909-034289968 | 0.958654 | 1.283886 | -0.386307 | 0.1691613    |
| A_14_P104789   | 9 | 34300936 | 34300995 | 37962  | AKO01795                 | 0.603569 | 1.023447 | -0.846995 | -0.22128803  |
| A_16_P02092996 | 9 | 34306572 | 34306631 | 39380  | chr9:034306572-034306631 | 0.823277 | 1.227392 | -0.576508 | -0.056825817 |
| A_16_P18606567 | 9 | 34314141 | 34314200 | 169947 | chr9:034314141-034314200 | 1.261662 | 1.611854 | -0.167497 | 0.36111405   |
| A_16_P18606577 | 9 | 34318120 | 34318179 | 99953  | chr9:034318120-034318179 | 1.061188 | 1.222173 | -0.302692 | -0.026471674 |
| A_16_P18606588 | 9 | 34321777 | 34321836 | 73407  | NUDT2                    | 1.464616 | 1.684913 | 0.210548  | 0.70593303   |
| A_14_P117683   | 9 | 34326250 | 34326303 | 148232 | NUDT2                    | 1.283716 | 1.446143 | -0.094732 | 0.4978486    |
| A_16_P18606610 | 9 | 34330253 | 34330312 | 44299  | NUDT2                    | 1.191542 | 1.511185 | 0.010341  | 0.360833478  |
| A_16_P38704393 | 9 | 34338656 | 34338715 | 154676 | chr9:034338656-034338715 | 1.155133 | 1.362611 | -0.416974 | 0.2243833    |
| A_16_P02093047 | 9 | 34342334 | 34342393 | 236698 | chr9:034342334-034342393 | 1.057203 | 1.410485 | -0.215041 | 0.26696154   |
| A_16_P18606650 | 9 | 34352595 | 34352654 | 108997 | chr9:034352595-034352654 | 1.128845 | 1.579451 | -0.075966 | 0.31863195   |
| A_16_P02093059 | 9 | 34356382 | 34356441 | 98846  | chr9:034356382-034356441 | 1.620053 | 1.33481  | 0.074585  | 0.7368309    |
| A_16_P02093061 | 9 | 34360148 | 34360207 | 11488  | KIAA1161                 | 1.331097 | 1.533971 | -0.016302 | 0.5533798    |
| A_16_P02093073 | 9 | 34365732 | 34365791 | 183642 | KIAA1161                 | 1.41973  | 1.754371 | 0.088695  | 0.6477257    |
| A_14_P136312   | 9 | 34371776 | 34371835 | 153353 | C9orf24                  | 1.316561 | 1.599703 | -0.028028 | 0.5941088    |
| A_16_P18606713 | 9 | 34374785 | 34374844 | 56706  | C9orf24                  | 1.13875  | 1.499265 | -0.293318 | 0.34194887   |
| A_16_P02093095 | 9 | 34381940 | 34381999 | 190853 | C9orf24                  | 1.210068 | 1.432118 | -0.138424 | 0.41110575   |
| A_14_P102888   | 9 | 34388235 | 34388294 | 92097  | C9orf25                  | 1.153435 | 1.337489 | -0.366235 | 0.1457538    |
| A_16_P18606763 | 9 | 34396499 | 34396558 | 210680 | C9orf25                  | 0.939519 | 1.117636 | -0.630714 | 0.20815064   |
| A_16_P02093132 | 9 | 34404109 | 34404168 | 117962 | C9orf25                  | 1.515556 | 1.869338 | 0.282388  | 0.849383     |
| A_16_P02093156 | 9 | 34418237 | 34418296 | 102804 | C9orf25                  | 1.370978 | 1.634769 | 0.029565  | 0.6341194    |
| A_16_P18606847 | 9 | 34425296 | 34425355 | 93305  | C9orf25                  | 0.855499 | 1.162354 | -0.634582 | -0.17886713  |
| A_16_P02093191 | 9 | 34439587 | 34439646 | 147643 | C9orf25                  | 0.982094 | 1.298748 | -0.586802 | 0.06198363   |
| A_16_P02093209 | 9 | 34448008 | 34448054 | 140353 | C9orf25                  | 0.946478 | 0.796707 | 0.239703  | 0.5099142    |
| A_16_P02093220 | 9 | 34456213 | 34456272 | 46447  | DNAI1                    | 0.414532 | 0.822856 | -1.126894 | -0.5901444   |
| A_14_P132242   | 9 | 34462039 | 34462098 | 23526  | DNAI1                    | 0.766791 | 1.126139 | -0.639051 | -0.12743956  |
| A_16_P18606955 | 9 | 34471318 | 34471377 | 31164  | DNAI1                    | 1.536906 | 1.734131 | -0.07389  | 0.6945909    |
| A_16_P02093268 | 9 | 34487164 | 34487220 | 157080 | DNAI1                    | 0.738771 | 0.901845 | -0.856334 | -0.26142305  |
| A_16_P02093294 | 9 | 34500055 | 34500113 | 149349 | DNAI1                    | 1.647296 | 1.997689 | 0.32226   | 1.0050595    |
| A_16_P18607061 | 9 | 34507087 | 34507146 | 16039  | DNAI1                    | 0.726396 | 1.118049 | -0.716821 | -0.11888391  |
| A_14_P117242   | 9 | 34510945 | 34510996 | 94648  | DNAI1                    | 0.754827 | 1.308233 | -0.208888 | 0.52532434   |
| A_16_P18607090 | 9 | 34515898 | 34515957 | 65041  | chr9:034515898-034515957 | 1.245867 | 1.553441 | -0.150471 | 0.4534803    |
| A_16_P18607098 | 9 | 34525009 | 34525068 | 230171 | chr9:034525009-034525068 | 1.299806 | 1.614818 | -0.20295  | 0.40948915   |
| A_16_P18607107 | 9 | 34528833 | 34528892 | 128130 | chr9:034528833-034528892 | 1.50124  | 1.811487 | 0.343178  | 0.7555164    |
| A_16_P02093342 | 9 | 34539246 | 34539305 | 177423 | chr9:034539246-034539305 | 1.661531 | 1.922544 | 0.236407  | 0.8760698    |
| A_16_P02093356 | 9 | 34546560 | 34546619 | 48430  | CNTFR                    | 1.133344 | 1.551045 | -0.10791  | 0.44317985   |
| A_16_P02093391 | 9 | 34562942 | 34563001 | 207488 | CNTFR                    | 1.344732 | 1.636086 | 0.092564  | 0.4918052    |
| A_14_P107103   | 9 | 34578605 | 34578663 | 3437   | CNTFR                    | 0.626396 | 1.011352 | -0.859355 | -0.51545864  |

|                |   |          |          |        |                          |          |          |           |              |
|----------------|---|----------|----------|--------|--------------------------|----------|----------|-----------|--------------|
| A_16_P02093443 | 9 | 34589376 | 34589435 | 119353 | chr9:034589376-034589435 | 1.05884  | 1.311267 | -0.276555 | 0.06347871   |
| A_16_P02093455 | 9 | 34594480 | 34594539 | 53026  | chr9:034594480-034594539 | 1.340685 | 1.545183 | 0.064485  | 0.48798558   |
| A_14_P107615   | 9 | 34600488 | 34600545 | 48031  | C9orf23                  | 1.553256 | 1.905044 | 0.503353  | 1.0115823    |
| A_14_P200249   | 9 | 34601846 | 34601896 | 147273 | C9orf23                  | 3.320144 | 2.473374 | -0.328421 | 0.3551662    |
| A_14_P119846   | 9 | 34604028 | 34604074 | 66136  | DCTN3                    | 1.459812 | 1.604116 | 0.273712  | 0.6341866    |
| A_14_P103245   | 9 | 34608506 | 34608565 | 108482 | DCTN3                    | 1.112819 | 1.28788  | -0.282145 | 0.33601546   |
| A_16_P18607368 | 9 | 34612125 | 34612183 | 238810 | ARID3C                   | 1.863414 | 2.106959 | 0.74661   | 1.1714158    |
| A_16_P02093493 | 9 | 34616739 | 34616798 | 196804 | ARID3C                   | 0.82186  | 1.078934 | -0.699083 | -0.24498224  |
| A_16_P02093502 | 9 | 34621353 | 34621409 | 239367 | chr9:034621353-034621409 | 1.588737 | 1.944174 | 0.496079  | 0.9049059    |
| A_14_P107916   | 9 | 34626747 | 34626806 | 173688 | OPRS1                    | 0.937089 | 1.34532  | -0.411449 | 0.013169482  |
| A_16_P18607424 | 9 | 34633764 | 34633823 | 183174 | chr9:034633764-034633823 | 1.291261 | 1.656008 | -0.031991 | 0.56166935   |
| A_14_P100216   | 9 | 34638095 | 34638150 | 212221 | GALT                     | 1.082867 | 1.363369 | -0.147393 | 0.3256806    |
| A_16_P18607456 | 9 | 34643535 | 34643591 | 174408 | AK094689                 | 1.299195 | 1.638896 | -0.026273 | 0.50977427   |
| A_14_P200250   | 9 | 34648339 | 34648398 | 119341 | IL11RA                   | 1.684808 | 1.794948 | 0.554027  | 0.9056072    |
| A_14_P131240   | 9 | 34651841 | 34651899 | 227205 | IL11RA                   | 1.083991 | 1.270582 | 0.365041  | 0.9641101    |
| A_14_P132346   | 9 | 34651900 | 34651957 | 185529 | CCL27                    | 0.684247 | 0.982547 | -0.717394 | -0.318909    |
| A_14_P112609   | 9 | 34654682 | 34654738 | 852    | BC037171                 | 0.340051 | 0.717569 | -0.282784 | -0.24177286  |
| A_16_P02093562 | 9 | 34659659 | 34659717 | 32660  | chr9:034659659-034659717 | 1.259899 | 1.621525 | 0.126442  | 0.46955755   |
| A_16_P18607516 | 9 | 34664332 | 34664391 | 129016 | chr9:034664332-034664391 | 0.443408 | 0.927961 | -1.053065 | -0.43695736  |
| A_16_P38705355 | 9 | 34670886 | 34670945 | 226078 | chr9:034670886-034670945 | 0.93099  | 1.253825 | -0.537486 | -0.116211504 |
| A_16_P02093577 | 9 | 34676435 | 34676494 | 87137  | chr9:034676435-034676494 | 1.213467 | 1.686113 | 0.0181    | 0.5039095    |
| A_14_P129790   | 9 | 34680988 | 34681036 | 226178 | CCL19                    | 1.908317 | 2.168135 | 0.799809  | 1.1418529    |
| A_16_P02093592 | 9 | 34686506 | 34686565 | 7874   | chr9:034686506-034686565 | 1.136448 | 0.945093 | -0.377176 | 0.18880859   |
| A_16_P18607560 | 9 | 34689649 | 34689708 | 28211  | chr9:034689649-034689708 | 1.518474 | 1.71678  | 0.345751  | 0.50311637   |
| A_16_P02093601 | 9 | 34694344 | 34694403 | 66021  | chr9:034694344-034694403 | 1.085964 | 1.276234 | -0.328372 | 0.09656913   |
| A_16_P18607590 | 9 | 34703703 | 34703762 | 243342 | chr9:034703703-034703762 | 0.873859 | 1.191705 | -0.384139 | 0.03937927   |
| A_16_P02093628 | 9 | 34712836 | 34712893 | 95510  | chr9:034712836-034712893 | 1.031971 | 1.255403 | 0.034532  | 0.33983576   |
| A_16_P02093638 | 9 | 34719022 | 34719081 | 51053  | chr9:034719022-034719081 | 1.207586 | 1.461721 | -0.219765 | 0.25473017   |
| A_16_P18607669 | 9 | 34735773 | 34735832 | 155921 | chr9:034735773-034735832 | 0.626934 | 0.846405 | -0.99461  | -0.47292697  |
| A_16_P18607704 | 9 | 34775697 | 34775756 | 14617  | chr9:034775697-034775756 | 1.146718 | 1.426447 | -0.05441  | 0.4968687    |
| A_16_P18607730 | 9 | 34792460 | 34792519 | 72504  | chr9:034792460-034792519 | 1.050423 | 1.436985 | -0.408846 | 0.2012764    |
| A_16_P18607756 | 9 | 34806766 | 34806825 | 228876 | chr9:034806766-034806825 | 1.378693 | 1.641471 | -0.160303 | 0.61081386   |
| A_16_P02093711 | 9 | 34819821 | 34819880 | 133052 | AL080137                 | 1.220817 | 1.43984  | -0.34692  | 0.1989509    |
| A_16_P02093722 | 9 | 34826627 | 34826683 | 59297  | BX648118                 | 0.762061 | 1.014061 | -0.667043 | -0.16876456  |
| A_16_P18607821 | 9 | 34833245 | 34833304 | 234389 | chr9:034833245-034833304 | 0.615546 | 1.108792 | -0.945322 | -0.33734387  |
| A_16_P18607823 | 9 | 34841760 | 34841819 | 127044 | chr9:034841760-034841819 | 0.815616 | 1.063561 | -0.554099 | -0.058984786 |
| A_14_P112392   | 9 | 34856614 | 34856673 | 161655 | chr9:034856614-034856673 | 1.345331 | 1.688361 | 0.002992  | 0.5328363    |
| A_16_P18607845 | 9 | 34865604 | 34865663 | 118682 | chr9:034865604-034865663 | 1.161759 | 1.297152 | -0.267842 | 0.23579866   |
| A_16_P02093752 | 9 | 34879751 | 34879810 | 61707  | chr9:034879751-034879810 | 0.641011 | 0.993813 | -0.828889 | -0.5567307   |
| A_16_P38705742 | 9 | 34892271 | 34892330 | 136005 | chr9:034892271-034892330 | 0.904135 | 1.175765 | -1.18886  | 0.20629053   |
| A_16_P18607923 | 9 | 34904691 | 34904750 | 25401  | chr9:034904691-034904750 | 1.197441 | 1.020212 | -0.323636 | 0.17372784   |
| A_16_P18607946 | 9 | 34918585 | 34918644 | 227664 | chr9:034918585-034918644 | 1.309113 | 1.623544 | -0.136808 | 0.35209835   |
| A_16_P18607978 | 9 | 34936431 | 34936490 | 58341  | chr9:034936431-034936490 | 0.765537 | 1.15916  | -0.696695 | -0.21308213  |
| A_16_P38705829 | 9 | 34945832 | 34945891 | 130326 | chr9:034945832-034945891 | 0.576788 | 1.013737 | -0.943046 | -0.38979197  |
| A_16_P38705848 | 9 | 34950986 | 34951045 | 217841 | AY956806                 | 1.226478 | 1.485147 | -0.007927 | 0.46406195   |
| A_16_P18608047 | 9 | 34963485 | 34963544 | 238594 | BC041169                 | 1.531681 | 1.677784 | 0.044871  | 0.6837811    |
| A_16_P02093864 | 9 | 34969515 | 34969574 | 240787 | BC041169                 | 1.344333 | 1.808087 | 0.11382   | 0.37952164   |
| A_16_P02093874 | 9 | 34973908 | 34973967 | 79841  | chr9:034973908-034973967 | 1.598765 | 1.869078 | 0.296966  | 0.74257296   |
| A_14_P122431   | 9 | 34980765 | 34980815 | 67270  | DNAJB5                   | 1.423146 | 1.472574 | -0.133651 | 0.28946918   |
| A_14_P124958   | 9 | 34986075 | 34986134 | 237171 | DNAJB5                   | 1.162845 | 1.485019 | -0.243605 | 0.20311804   |
| A_16_P38705988 | 9 | 34988682 | 34988741 | 226198 | chr9:034988682-034988741 | 0.844491 | 1.174366 | -0.906993 | -0.39022148  |
| A_16_P18608152 | 9 | 35001164 | 35001223 | 35864  | chr9:035001164-035001223 | 1.078111 | 1.221672 | -0.188396 | 0.2506539    |
| A_16_P02093915 | 9 | 35019841 | 35019899 | 173638 | AK056829                 | 1.574765 | 1.776821 | 0.440904  | 0.8786818    |
| A_16_P38706029 | 9 | 35028306 | 35028365 | 109493 | chr9:035028306-035028365 | 1.232425 | 1.610655 | -0.015642 | 0.5918939    |
| A_16_P38706037 | 9 | 35032792 | 35032851 | 144386 | C9orf131                 | 1.196889 | 1.666088 | -0.081677 | 0.48322293   |
| A_16_P02093939 | 9 | 35036415 | 35036474 | 83455  | chr9:035036415-035036474 | 1.334342 | 1.669833 | 0.208149  | 0.56041586   |
| A_16_P18608201 | 9 | 35044345 | 35044404 | 65024  | chr9:035044345-035044404 | 1.330444 | 1.53108  | -0.011213 | 0.3644585    |
| A_14_P124926   | 9 | 35049634 | 35049690 | 70097  | VCP                      | 1.443195 | 1.584221 | 0.170358  | 0.54468286   |
| A_16_P18608224 | 9 | 35052325 | 35052384 | 178584 | VCP                      | 1.429724 | 1.67612  | -0.069652 | 0.6108301    |
| A_16_P18608235 | 9 | 35055202 | 35055261 | 207819 | VCP                      | 1.558493 | 1.728819 | 0.324944  | 0.7499276    |
| A_14_P103760   | 9 | 35057909 | 35057967 | 193221 | VCP                      | 0.13656  | 0.71348  | -1.3007   | -0.68481475  |
| A_14_P127907   | 9 | 35063835 | 35063894 | 139651 | FANCG                    | 1.235206 | 1.53393  | 0.059741  | 0.50814116   |
| A_14_P108514   | 9 | 35066524 | 35066588 | 175512 | FANCG                    | 1.289754 | 1.576805 | 0.210296  | 0.5732828    |
| A_14_P120187   | 9 | 35068864 | 35068919 | 192537 | FANCG                    | 0.690839 | 1.062685 | -0.535828 | -0.2610614   |
| A_16_P18608289 | 9 | 35074185 | 35074232 | 46124  | chr9:035074185-035074232 | 1.342992 | 1.615402 | 0.078241  | 0.60695684   |
| A_14_P123344   | 9 | 35080704 | 35080763 | 145963 | PIGO                     | 1.480491 | 1.70995  | 0.179804  | 0.7498517    |
| A_16_P18608314 | 9 | 35083578 | 35083637 | 49806  | PIGO                     | 1.144455 | 1.493298 | -0.211219 | 0.27254257   |
| A_16_P18608327 | 9 | 35086929 | 35086988 | 158959 | chr9:035086929-035086988 | 0.759848 | 0.967339 | -0.784493 | -0.43277317  |
| A_14_P124126   | 9 | 35091632 | 35091689 | 8958   | STOML2                   | 1.280671 | 1.460631 | -0.077777 | 0.3891639    |
| A_14_P102628   | 9 | 35097349 | 35097397 | 216471 | KIAA1539                 | 1.050344 | 1.376943 | -0.330623 | 0.198732     |
| A_14_P122160   | 9 | 35100120 | 35100174 | 188181 | KIAA1539                 | 0.276816 | 0.484128 | -1.175489 | -0.87786746  |
| A_14_P100981   | 9 | 35105705 | 35105749 | 72482  | KIAA1539                 | 1.383613 | 1.687956 | 0.607757  | 1.0248837    |
| A_16_P18608396 | 9 | 35110237 | 35110296 | 106181 | chr9:035110237-035110296 | 0.962376 | 1.348151 | -0.46407  | -0.015365392 |

|                |   |          |          |        |                          |           |          |           |              |
|----------------|---|----------|----------|--------|--------------------------|-----------|----------|-----------|--------------|
| A_16_P02094065 | 9 | 35113870 | 35113929 | 190862 | chr9:035113870-035113929 | 1.084426  | 1.537514 | -0.272694 | 0.07177569   |
| A_16_P18608406 | 9 | 35125082 | 35125141 | 49503  | chr9:035125082-035125141 | 1.191861  | 1.504953 | 0.023887  | 0.25111097   |
| A_16_P02094072 | 9 | 35151556 | 35151615 | 97481  | chr9:035151556-035151615 | 0.787803  | 1.141952 | -0.464428 | -0.15612736  |
| A_16_P18608445 | 9 | 35159370 | 35159429 | 27320  | UNC13B                   | 1.44947   | 1.683631 | 0.293991  | 0.6441021    |
| A_16_P18608467 | 9 | 35170010 | 35170069 | 183043 | UNC13B                   | 0.59971   | 0.940986 | -0.7749   | -0.17997572  |
| A_16_P02094101 | 9 | 35175222 | 35175281 | 160947 | UNC13B                   | 1.176086  | 1.461094 | -0.399737 | 0.26720357   |
| A_14_P110697   | 9 | 35186492 | 35186551 | 146982 | UNC13B                   | 0.476972  | 0.631215 | -1.261371 | -0.60131246  |
| A_16_P18608487 | 9 | 35198067 | 35198126 | 171023 | UNC13B                   | 1.19895   | 1.592712 | -0.273517 | 0.16699283   |
| A_16_P02094118 | 9 | 35209388 | 35209447 | 61475  | UNC13B                   | 0.843538  | 1.025588 | -0.848517 | -0.12199056  |
| A_16_P18608518 | 9 | 35217962 | 35218021 | 5837   | UNC13B                   | 0.691228  | 1.002004 | -0.891961 | -0.5539585   |
| A_16_P02094143 | 9 | 35227750 | 35227809 | 237452 | UNC13B                   | 1.236061  | 1.530196 | 0.084048  | 0.39896226   |
| A_14_P138480   | 9 | 35233265 | 35233324 | 58792  | UNC13B                   | 0.652919  | 1.027164 | -0.483686 | -0.3901083   |
| A_16_P02094161 | 9 | 35249627 | 35249686 | 76485  | UNC13B                   | 0.778344  | 1.17536  | -0.651692 | 0.043315664  |
| A_16_P38706504 | 9 | 35256671 | 35256730 | 87467  | UNC13B                   | 1.041961  | 1.254211 | -0.569091 | 0.1831978    |
| A_16_P02094184 | 9 | 35267670 | 35267729 | 136612 | UNC13B                   | 0.945426  | 1.103851 | -0.619105 | -0.15859741  |
| A_16_P18608632 | 9 | 35273119 | 35273178 | 47376  | UNC13B                   | 0.89993   | 1.264614 | -0.476303 | 0.13162856   |
| A_16_P18608644 | 9 | 35278351 | 35278410 | 124742 | UNC13B                   | 0.205939  | 0.670424 | -1.385167 | -0.975093    |
| A_16_P18608669 | 9 | 35286259 | 35286318 | 2301   | UNC13B                   | 0.994526  | 1.297677 | -0.43598  | 0.0694576    |
| A_16_P02094226 | 9 | 35294835 | 35294894 | 154563 | UNC13B                   | 0.809562  | 1.214064 | -0.918792 | -0.24316877  |
| A_14_P135219   | 9 | 35303877 | 35303933 | 135463 | UNC13B                   | 0.749471  | 1.09559  | -0.851078 | -0.118593425 |
| A_16_P18608738 | 9 | 35312790 | 35312849 | 74980  | UNC13B                   | 1.350402  | 1.627343 | 0.165722  | 0.7668265    |
| A_16_P38706686 | 9 | 35324679 | 35324738 | 78625  | UNC13B                   | 1.177412  | 1.500146 | -0.250322 | 0.31329238   |
| A_16_P18608807 | 9 | 35334750 | 35334809 | 145021 | UNC13B                   | 1.397046  | 1.635256 | -0.075736 | 0.5448248    |
| A_16_P18608827 | 9 | 35340705 | 35340764 | 194371 | UNC13B                   | 0.078283  | 0.350488 | -1.489264 | -0.163667    |
| A_16_P02094313 | 9 | 35346022 | 35346081 | 42265  | UNC13B                   | 0.936151  | 1.187252 | -0.578726 | -0.14396557  |
| A_14_P133367   | 9 | 35352007 | 35352066 | 127573 | UNC13B                   | 0.728288  | 1.004495 | -0.916211 | -0.405335    |
| A_16_P02094339 | 9 | 35364682 | 35364741 | 169539 | UNC13B                   | 1.136095  | 1.456842 | -0.202276 | 0.24551547   |
| A_16_P18608931 | 9 | 35375675 | 35375734 | 31682  | UNC13B                   | 0.324108  | 0.612229 | -1.326733 | -0.9396194   |
| A_16_P02094377 | 9 | 35381505 | 35381564 | 77519  | UNC13B                   | 1.696079  | 2.072484 | 0.383264  | 0.8865897    |
| A_14_P123722   | 9 | 35394384 | 35394443 | 173687 | UNC13B                   | 1.165945  | 1.444735 | -0.116303 | 0.1113949    |
| A_16_P02094420 | 9 | 35403115 | 35403174 | 94682  | LOC158381                | 1.10871   | 1.479583 | -0.172088 | 0.35363358   |
| A_16_P18609034 | 9 | 35417927 | 35417986 | 114737 | LOC158381                | 0.893177  | 0.952892 | -0.582554 | -0.28460303  |
| A_16_P02094436 | 9 | 35423671 | 35423730 | 157259 | LOC158381                | 1.279969  | 1.621271 | 0.100541  | 0.541867     |
| A_16_P18609073 | 9 | 35434343 | 35434402 | 50004  | LOC158381                | 1.243923  | 1.647702 | 0.004691  | 0.48432368   |
| A_16_P38707035 | 9 | 35441090 | 35441149 | 214542 | BC031276                 | 0.801061  | 1.014413 | -0.50028  | -0.07588515  |
| A_16_P02094473 | 9 | 35454480 | 35454539 | 67250  | BC031276                 | 1.073488  | 1.146507 | -0.680028 | -0.080759555 |
| A_16_P18609123 | 9 | 35461313 | 35461372 | 7129   | BC031276                 | 0.835054  | 1.114897 | -0.890405 | -0.46185064  |
| A_16_P02094492 | 9 | 35467102 | 35467161 | 76309  | BC031276                 | 0.560548  | 0.898011 | -0.866702 | -0.23245665  |
| A_16_P18609158 | 9 | 35475889 | 35475948 | 47998  | chr9:035475889-035475948 | 1.153234  | 1.466815 | -0.256425 | 0.41752583   |
| A_16_P18609180 | 9 | 35486775 | 35486834 | 225343 | RUSC2                    | 0.163521  | 0.690244 | -1.351817 | -0.7706557   |
| A_16_P18609197 | 9 | 35495217 | 35495276 | 147919 | RUSC2                    | 0.609806  | 1.03814  | -0.848867 | -0.31989062  |
| A_16_P18609218 | 9 | 35501498 | 35501557 | 95249  | RUSC2                    | 0.878217  | 1.154911 | -0.807225 | -0.47250348  |
| A_16_P02094553 | 9 | 35507216 | 35507275 | 120899 | RUSC2                    | 1.591454  | 1.790424 | 0.11345   | 0.5701361    |
| A_16_P18609264 | 9 | 35520515 | 35520574 | 27905  | RUSC2                    | 1.396652  | 1.625096 | 0.068897  | 0.9840778    |
| A_16_P02094578 | 9 | 35526422 | 35526481 | 146119 | RUSC2                    | 1.411381  | 1.628538 | -0.129866 | 0.6002261    |
| A_14_P107058   | 9 | 35532843 | 35532902 | 75325  | RUSC2                    | -0.098902 | 0.329907 | -1.686905 | -1.3251379   |
| A_16_P02094607 | 9 | 35542917 | 35542976 | 215632 | RUSC2                    | 1.166387  | 1.326436 | -0.21155  | -0.02422227  |
| A_16_P02094617 | 9 | 35548755 | 35548814 | 42519  | RUSC2                    | 1.125738  | 1.653918 | 0.019302  | 0.31386524   |
| A_16_P02094630 | 9 | 35554312 | 35554371 | 44238  | chr9:035554312-035554371 | 1.437765  | 1.738848 | 0.095741  | 0.62254286   |
| A_16_P38707334 | 9 | 35564165 | 35564224 | 164816 | chr9:035564165-035564224 | 1.15196   | 1.178977 | -0.465013 | 0.0674562    |
| A_16_P18609386 | 9 | 35580950 | 35581009 | 168621 | chr9:035580950-035581009 | 0.895952  | 1.271406 | -0.366342 | 0.1362942    |
| A_16_P18609391 | 9 | 35587403 | 35587462 | 103047 | chr9:035587403-035587462 | 1.310935  | 1.633708 | 0.116155  | 0.45194775   |
| A_16_P02094645 | 9 | 35592931 | 35592990 | 95252  | chr9:035592931-035592990 | 0.985589  | 1.181651 | -0.787415 | -0.33983433  |
| A_14_P128330   | 9 | 35598815 | 35598866 | 235753 | TESK1                    | 1.884615  | 1.761911 | 0.319473  | 0.81839496   |
| A_14_P116075   | 9 | 35602878 | 35602935 | 49331  | CD72                     | 0.1997    | 0.618555 | -1.271174 | -0.69168454  |
| A_16_P18609441 | 9 | 35606351 | 35606410 | 73197  | CD72                     | 0.681793  | 1.116131 | -0.745649 | -0.2778054   |
| A_16_P02094682 | 9 | 35609821 | 35609879 | 57491  | DQ174771                 | 0.55869   | 0.750144 | -0.824191 | -0.45419836  |
| A_16_P02094685 | 9 | 35613486 | 35613545 | 95455  | DQ174771                 | 1.187726  | 1.461016 | -0.174201 | 0.25239658   |
| A_16_P18609467 | 9 | 35619874 | 35619933 | 165099 | DQ174771                 | 0.761596  | 1.51453  | -0.530885 | -0.22236344  |
| A_16_P38707445 | 9 | 35626487 | 35626546 | 227445 | DQ174771                 | 0.645952  | 1.047899 | -0.855694 | -0.35302627  |
| A_16_P02094696 | 9 | 35633491 | 35633550 | 173219 | DQ174771                 | 1.297251  | 1.528519 | -0.019995 | 0.4238791    |
| A_16_P38707466 | 9 | 35639252 | 35639311 | 201761 | chr9:035639252-035639311 | 0.868222  | 1.433258 | -0.683199 | -0.2152549   |
| A_16_P18609513 | 9 | 35644567 | 35644624 | 11948  | chr9:035644567-035644624 | 0.703711  | 0.984323 | -0.644115 | -0.23741764  |
| A_14_P132313   | 9 | 35648056 | 35648115 | 225016 | chr9:035648056-035648115 | 1.025317  | 1.315033 | -0.161257 | 0.25013295   |
| A_16_P38707505 | 9 | 35651458 | 35651517 | 46561  | C9orf100                 | 1.022799  | 1.510498 | -0.177249 | 0.15853539   |
| A_14_P119129   | 9 | 35654853 | 35654900 | 21463  | C9orf100                 | 0.940004  | 1.059877 | -0.557244 | -0.1803298   |
| A_16_P18609556 | 9 | 35660576 | 35660635 | 132057 | BC038673                 | 1.36744   | 1.666748 | -0.073105 | 0.38379768   |
| A_14_P121177   | 9 | 35664281 | 35664329 | 102338 | CA9                      | 1.114058  | 1.745424 | 0.134515  | 0.68373644   |
| A_14_P138050   | 9 | 35667180 | 35667239 | 177158 | CA9                      | 1.440278  | 1.718207 | 0.252841  | 0.76339      |
| A_14_P138856   | 9 | 35668536 | 35668595 | 72589  | CA9                      | 1.082887  | 1.221335 | -0.345915 | -0.15986267  |
| A_14_P107838   | 9 | 35673662 | 35673721 | 8534   | TPM2                     | 0.980582  | 1.295187 | -0.447239 | -4.29E-04    |
| A_16_P02094759 | 9 | 35678294 | 35678353 | 141104 | TPM2                     | 0.924762  | 1.259762 | -0.477003 | 0.123490736  |
| A_16_P18609626 | 9 | 35681541 | 35681600 | 167575 | chr9:035681541-035681600 | 1.060004  | 1.386927 | -0.431355 | 0.15708965   |

|                |   |          |          |        |                          |          |          |             |              |
|----------------|---|----------|----------|--------|--------------------------|----------|----------|-------------|--------------|
| A_16_P02094776 | 9 | 35690698 | 35690757 | 204016 | TLN1                     | 1.160574 | 1.507174 | -0.106324   | 0.5067729    |
| A_14_P120241   | 9 | 35698126 | 35698185 | 46408  | TLN1                     | 0.642842 | 1.037323 | -0.693846   | -0.42027986  |
| A_16_P02094805 | 9 | 35705257 | 35705316 | 211752 | TLN1                     | 0.599101 | 1.041304 | -0.642124   | -0.2619624   |
| A_16_P38707747 | 9 | 35711509 | 35711568 | 118008 | TLN1                     | 0.886585 | 1.305339 | -0.53194    | -0.07109532  |
| A_16_P02094834 | 9 | 35716736 | 35716795 | 167420 | TLN1                     | 1.275003 | 1.552007 | -0.213357   | 0.35374963   |
| A_14_P121653   | 9 | 35722931 | 35722978 | 65825  | CREB3                    | 1.373223 | 1.646146 | 0.09835     | 0.55391335   |
| A_14_P135440   | 9 | 35723127 | 35723173 | 163751 | CREB3                    | 1.049774 | 1.267907 | 0.472975    | 0.74526745   |
| A_14_P200251   | 9 | 35726945 | 35727002 | 220544 | CREB3                    | 1.449159 | 1.822798 | 0.25352     | 0.65497315   |
| A_14_P121067   | 9 | 35727452 | 35727502 | 62567  | GBA2                     | 0.985329 | 1.419951 | -0.272836   | 0.20375384   |
| A_14_P118026   | 9 | 35728745 | 35728791 | 213563 | GBA2                     | 1.445094 | 1.736279 | 0.589001    | 1.0015322    |
| A_16_P02094880 | 9 | 35737965 | 35738024 | 240699 | GBA2                     | 0.818149 | 0.835861 | -0.621265   | -0.19907632  |
| A_16_P02094889 | 9 | 35742360 | 35742419 | 181116 | KIAA0258                 | 0.767326 | 1.086299 | -0.787614   | -0.16618511  |
| A_14_P132355   | 9 | 35746179 | 35746238 | 25858  | D87447                   | 0.992416 | 1.445585 | -0.361878   | 0.16178787   |
| A_16_P18609841 | 9 | 35751808 | 35751867 | 163530 | BC014254                 | 1.600358 | 1.783827 | 0.223614    | 0.70620906   |
| A_16_P18609854 | 9 | 35756987 | 35757046 | 174882 | chr9:035756987-035757046 | 0.916896 | 1.336797 | -0.394087   | 0.14642055   |
| A_16_P02094933 | 9 | 35766650 | 35766709 | 82079  | chr9:035766650-035766709 | 1.392595 | 1.680673 | -0.022782   | 0.35772383   |
| A_16_P02094947 | 9 | 35777162 | 35777221 | 13707  | chr9:035777162-035777221 | 0.988775 | 1.271026 | -0.438162   | 0.120464936  |
| A_16_P02094962 | 9 | 35785348 | 35785407 | 232535 | NPR2                     | 1.259425 | 1.670954 | -0.055548   | 0.41070664   |
| A_16_P38708041 | 9 | 35792698 | 35792757 | 31620  | NPR2                     | 1.071661 | 1.125584 | -0.684155   | -0.22520205  |
| A_14_P129551   | 9 | 35798809 | 35798862 | 51769  | NPR2                     | 1.757999 | 1.980512 | 0.462436    | 0.9477417    |
| A_14_P200252   | 9 | 35801640 | 35801697 | 205931 | SPAG8                    | 1.018127 | 1.497481 | -0.340848   | 0.099785686  |
| A_14_P104409   | 9 | 35802929 | 35802988 | 95442  | HINT2                    | 1.632763 | 1.913823 | 0.24487     | 0.7610311    |
| A_14_P200253   | 9 | 35804206 | 35804265 | 237487 | HINT2                    | 0.545984 | 0.683336 | -1.116952   | -0.5013599   |
| A_16_P02095024 | 9 | 35811410 | 35811469 | 77160  | C9orf128                 | 1.607161 | 1.789288 | 0.532971    | 0.6309162    |
| A_16_P02095033 | 9 | 35816118 | 35816173 | 12096  | C9orf128                 | 0.42623  | 0.541011 | -1.238412   | -0.7889737   |
| A_14_P108539   | 9 | 35819796 | 35819840 | 160545 | C9orf127                 | 1.633757 | 1.690131 | 0.091797    | 0.6788862    |
| A_16_P18610058 | 9 | 35824867 | 35824926 | 163041 | C9orf127                 | 1.575525 | 1.931844 | 0.200987    | 0.6152929    |
| A_16_P02095057 | 9 | 35827978 | 35828037 | 135444 | C9orf127                 | 0.991888 | 1.495972 | -0.550054   | 0.017692074  |
| A_14_P115158   | 9 | 35832125 | 35832184 | 21959  | C9orf127                 | 1.038233 | 1.351071 | -0.370876   | 0.101509646  |
| A_16_P18610098 | 9 | 35837172 | 35837231 | 165493 | C9orf127                 | 0.578132 | 0.677611 | -1.104729   | -0.58122265  |
| A_16_P38708240 | 9 | 35841460 | 35841519 | 144207 | C9orf127                 | 1.387271 | 1.567419 | 0.056066    | 0.55560565   |
| A_16_P18610127 | 9 | 35845897 | 35845956 | 131712 | chr9:035845897-035845956 | 0.572704 | 0.749779 | -0.970249   | -0.42975783  |
| A_16_P02095109 | 9 | 35853345 | 35853403 | 208137 | AL832569                 | 1.101207 | 1.404175 | -0.546605   | 0.15721443   |
| A_16_P02095124 | 9 | 35861568 | 35861627 | 109475 | chr9:035861568-035861627 | 1.2231   | 1.705023 | -0.123214   | 0.58796924   |
| A_16_P18610182 | 9 | 35872626 | 35872685 | 110017 | chr9:035872626-035872685 | 0.973202 | 1.215615 | -0.710051   | -0.14896184  |
| A_16_P02095142 | 9 | 35885033 | 35885092 | 212356 | chr9:035885033-035885092 | 0.785029 | 1.163762 | -0.700795   | 0.006860584  |
| A_16_P18610272 | 9 | 35914336 | 35914395 | 180171 | chr9:035914336-035914395 | 0.77027  | 1.217486 | -0.19100922 | -0.19100592  |
| A_16_P18610304 | 9 | 35926585 | 35926644 | 128742 | chr9:035926585-035926644 | 0.984613 | 1.216773 | -0.631549   | 0.05123608   |
| A_16_P02095216 | 9 | 35933951 | 35934010 | 65994  | chr9:035933951-035934010 | 0.976177 | 1.256135 | -0.597015   | 0.23209807   |
| A_16_P38708471 | 9 | 35942550 | 35942609 | 104996 | chr9:035942550-035942609 | 0.778868 | 1.132845 | -0.863178   | -0.067703515 |
| A_14_P133985   | 9 | 35946958 | 35947017 | 170745 | chr9:035946958-035947017 | 0.455779 | 0.761974 | -1.107894   | -0.5489177   |
| A_16_P38708506 | 9 | 35953425 | 35953484 | 110556 | chr9:035953425-035953484 | 1.330987 | 1.587438 | -0.150779   | 0.63593024   |
| A_16_P38708508 | 9 | 35960900 | 35960959 | 62593  | chr9:035960900-035960959 | 0.541916 | 0.909268 | -1.141364   | -0.25055203  |
| A_16_P18610390 | 9 | 35971395 | 35971454 | 123501 | chr9:035971395-035971454 | 0.346751 | 1.667338 | -0.240323   | 0.50056535   |
| A_16_P18610398 | 9 | 35978317 | 35978376 | 211537 | chr9:035978317-035978376 | 1.106392 | 1.346387 | -0.296613   | 0.067332685  |
| A_16_P18610412 | 9 | 35983590 | 35983649 | 69818  | chr9:035983590-035983649 | 1.439547 | 1.641556 | -0.144782   | 0.57451516   |
| A_16_P18610420 | 9 | 35989498 | 35989557 | 108714 | chr9:035989498-035989557 | 0.874637 | 1.22395  | -0.591456   | -0.011233136 |
| A_16_P18610444 | 9 | 35997809 | 35997868 | 82687  | chr9:035997809-035997868 | 1.21238  | 1.062342 | -0.454249   | 0.20914853   |
| A_16_P02095287 | 9 | 36004818 | 36004877 | 53344  | chr9:036004818-036004877 | 1.307134 | 0.789308 | -0.511545   | 0.46456662   |
| A_16_P02095301 | 9 | 36019053 | 36019112 | 158048 | chr9:036019053-036019112 | 0.847797 | 1.192517 | -0.598234   | -0.073874235 |
| A_16_P18610508 | 9 | 36025991 | 36026050 | 161477 | chr9:036025991-036026050 | 1.520263 | 1.427742 | 0.430428    | 0.5915554    |
| A_16_P02095317 | 9 | 36031281 | 36031340 | 78234  | RECK                     | 0.822039 | 1.179993 | -0.850525   | -0.19032878  |
| A_14_P112860   | 9 | 36042266 | 36042325 | 131114 | RECK                     | 1.168156 | 1.523861 | -0.281167   | 0.34163025   |
| A_16_P02095335 | 9 | 36048810 | 36048869 | 4723   | RECK                     | 0.808892 | 1.151526 | -0.86245    | -0.16041285  |
| A_16_P18610580 | 9 | 36055595 | 36055654 | 106198 | RECK                     | 0.938268 | 1.086086 | -0.709804   | -0.27849892  |
| A_16_P18610604 | 9 | 36064045 | 36064102 | 204372 | RECK                     | 0.537394 | 0.766227 | -1.232489   | -0.36395305  |
| A_16_P38708785 | 9 | 36077943 | 36078002 | 141347 | RECK                     | 0.668524 | 0.949123 | -1.042643   | -0.37371475  |
| A_16_P18610659 | 9 | 36083040 | 36083094 | 79324  | RECK                     | 1.441574 | 1.674511 | 0.091065    | 0.5855235    |
| A_14_P131230   | 9 | 36090483 | 36090542 | 97541  | RECK                     | 0.667287 | 1.006112 | -0.791422   | -0.37363374  |
| A_16_P38708838 | 9 | 36099908 | 36099967 | 221331 | RECK                     | 0.805141 | 1.199921 | -0.676965   | -0.18218371  |
| A_16_P18610712 | 9 | 36105651 | 36105710 | 30853  | RECK                     | 0.684157 | 1.05466  | -0.832346   | -0.26682916  |
| A_16_P18610731 | 9 | 36111597 | 36111656 | 225917 | RECK                     | 0.849985 | 1.234413 | -0.755944   | -0.23355389  |
| A_16_P02095455 | 9 | 36116899 | 36116958 | 122912 | chr9:036116899-036116958 | 0.704658 | 1.055726 | -1.253842   | -0.34522408  |
| A_16_P18610761 | 9 | 36122444 | 36122502 | 191783 | chr9:036122444-036122502 | 1.063539 | 1.420039 | -0.46681    | 0.21741414   |
| A_16_P02095478 | 9 | 36130660 | 36130718 | 119530 | C9orf19                  | 1.778226 | 2.072487 | 0.36033     | 0.98673344   |
| A_16_P02095490 | 9 | 36135831 | 36135890 | 26443  | C9orf19                  | 1.246496 | 1.777571 | 0.203201    | 0.819401     |
| A_16_P18610818 | 9 | 36141025 | 36141084 | 105966 | C9orf19                  | 1.048539 | 1.286037 | -0.519389   | -0.01002039  |
| A_16_P02095504 | 9 | 36144634 | 36144693 | 169941 | C9orf19                  | 0.920497 | 1.348359 | -0.498808   | 0.004390061  |
| A_16_P02095507 | 9 | 36148693 | 36148752 | 201331 | C9orf19                  | 1.278946 | 1.672315 | -0.01085    | 0.5576127    |
| A_14_P130375   | 9 | 36153040 | 36153099 | 124953 | C9orf19                  | 0.829538 | 0.993573 | -1.084007   | 0.11554313   |
| A_14_P103078   | 9 | 36161237 | 36161296 | 153397 | CCIN                     | 1.187078 | 1.405938 | -0.751127   | -0.14852592  |
| A_16_P38709022 | 9 | 36163311 | 36163358 | 124461 | chr9:036163311-036163358 | 0.498331 | 0.895881 | -1.024545   | -0.5679099   |
| A_16_P02095528 | 9 | 36176197 | 36176256 | 106931 | chr9:036176197-036176256 | 1.350436 | 1.729235 | 0.009462    | 0.6545692    |

|                |   |          |          |        |                          |           |          |           |              |
|----------------|---|----------|----------|--------|--------------------------|-----------|----------|-----------|--------------|
| A_14_P114080   | 9 | 36182065 | 36182124 | 78784  | CLTA                     | 1.027431  | 1.294257 | -0.514614 | 0.1737557    |
| A_16_P38709062 | 9 | 36188907 | 36188966 | 69301  | CLTA                     | 0.991949  | 1.528006 | -0.394775 | 0.27691662   |
| A_16_P38709075 | 9 | 36193425 | 36193484 | 69073  | CLTA                     | 1.544209  | 1.911247 | 0.282687  | 0.80539876   |
| A_16_P38709102 | 9 | 36200587 | 36200646 | 221470 | CLTA                     | 0.781175  | 1.231532 | -0.949981 | -0.32012177  |
| A_14_P137115   | 9 | 36207256 | 36207315 | 104348 | GNE                      | 1.237531  | 1.626563 | -1.19E-04 | 0.6231898    |
| A_16_P02095600 | 9 | 36219673 | 36219732 | 142030 | GNE                      | 1.643243  | 1.858397 | 0.316952  | 0.75327843   |
| A_16_P02095619 | 9 | 36236435 | 36236494 | 239821 | GNE                      | 1.220268  | 1.640063 | -0.006497 | 0.44239765   |
| A_16_P38709223 | 9 | 36246585 | 36246644 | 164449 | GNE                      | 1.421608  | 1.670291 | 0.028822  | 0.6800568    |
| A_16_P18611054 | 9 | 36252211 | 36252270 | 113326 | chr9:036252211-036252270 | 0.888275  | 1.263299 | -0.599159 | -0.045317054 |
| A_16_P38709252 | 9 | 36261796 | 36261855 | 48165  | chr9:036261796-036261855 | 0.842134  | 1.152228 | -0.543509 | -0.048360497 |
| A_16_P18611089 | 9 | 36270283 | 36270342 | 45358  | chr9:036270283-036270342 | 0.906803  | 1.340186 | -0.775359 | -0.05852154  |
| A_16_P18611097 | 9 | 36277539 | 36277598 | 186402 | chr9:036277539-036277598 | 0.36944   | 0.87634  | -1.214101 | -0.5479361   |
| A_16_P18611127 | 9 | 36289421 | 36289480 | 25989  | chr9:036289421-036289480 | 1.391906  | 1.750311 | 0.21441   | 0.5498775    |
| A_16_P18611145 | 9 | 36296662 | 36296721 | 234507 | chr9:036296662-036296721 | 1.308968  | 1.71268  | -0.025591 | 0.5199641    |
| A_16_P02095695 | 9 | 36308328 | 36308387 | 33412  | chr9:036308328-036308387 | 1.046527  | 1.522479 | -0.397354 | 0.4126168    |
| A_16_P38709353 | 9 | 36315745 | 36315804 | 162689 | chr9:036315745-036315804 | 1.46012   | 1.654732 | 0.34739   | 0.7374876    |
| A_16_P02095707 | 9 | 36321530 | 36321588 | 137    | chr9:036321530-036321588 | 0.307365  | 0.748792 | -1.216313 | -0.6310178   |
| A_16_P38709382 | 9 | 36328832 | 36328891 | 85245  | RNF38                    | 0.678071  | 0.966476 | -0.892997 | -0.47562355  |
| A_14_P202036   | 9 | 36334799 | 36334858 | 179856 | RNF38                    | 0.737298  | 1.369506 | -0.591668 | -0.06328645  |
| A_16_P38709413 | 9 | 36341080 | 36341139 | 183517 | RNF38                    | 0.763868  | 1.342259 | -0.454724 | 0.14268816   |
| A_16_P18611245 | 9 | 36347721 | 36347780 | 134305 | RNF38                    | 1.315604  | 1.585815 | 0.035669  | 0.5547353    |
| A_14_P133280   | 9 | 36353448 | 36353507 | 6120   | RNF38                    | -1.929359 | 3.165742 | 1.427557  | 0.85043234   |
| A_16_P02095770 | 9 | 36359839 | 36359898 | 64635  | RNF38                    | 1.262366  | 1.701057 | -0.139806 | 0.4907042    |
| A_16_P38709495 | 9 | 36372768 | 36372827 | 238337 | RNF38                    | 1.324815  | 1.820507 | -0.035783 | 0.6569599    |
| A_16_P02095800 | 9 | 36380135 | 36380194 | 229331 | RNF38                    | 0.688308  | 1.151468 | -0.843601 | -0.17630005  |
| A_14_P109345   | 9 | 36390093 | 36390152 | 19606  | RNF38                    | 0.90287   | 1.465949 | -0.532974 | 0.34450108   |
| A_16_P18611372 | 9 | 36396031 | 36396090 | 193547 | chr9:036396031-036396090 | 0.704152  | 1.150005 | -0.769595 | -0.09836009  |
| A_14_P109893   | 9 | 36409434 | 36409493 | 208413 | chr9:036409434-036409493 | 1.083201  | 1.193621 | 0.072179  | 0.33229274   |
| A_16_P18611416 | 9 | 36418729 | 36418788 | 217979 | chr9:036418729-036418788 | 0.370652  | 0.861089 | -1.121375 | -0.60407597  |
| A_16_P38709636 | 9 | 36432195 | 36432254 | 122144 | chr9:036432195-036432254 | 0.87337   | 1.058752 | -0.821117 | -0.15804923  |
| A_16_P18611482 | 9 | 36447251 | 36447310 | 169498 | chr9:036447251-036447310 | 1.21496   | 1.03215  | -0.582449 | 0.31901515   |
| A_16_P18611531 | 9 | 36470867 | 36470926 | 81693  | chr9:036470867-036470926 | 0.941036  | 1.21932  | -0.392326 | -0.006070405 |
| A_16_P02095977 | 9 | 36529972 | 36529930 | 95529  | chr9:036529872-036529930 | 1.234667  | 1.525058 | -0.123469 | 0.3663255    |
| A_16_P18611660 | 9 | 36553862 | 36553921 | 39751  | chr9:036553862-036553921 | 1.029     | 1.31016  | -0.238687 | 0.32055026   |
| A_16_P18611678 | 9 | 36565768 | 36565827 | 141955 | MELK                     | 1.400785  | 1.719407 | 0.125029  | 0.5192923    |
| A_16_P18611692 | 9 | 36573746 | 36573805 | 118767 | MELK                     | 0.693533  | 1.004125 | -0.763389 | -0.29898113  |
| A_14_P121712   | 9 | 36579598 | 36579656 | 10253  | MELK                     | 1.638872  | 1.81466  | 0.40922   | 0.86355627   |
| A_16_P02096011 | 9 | 36587160 | 36587219 | 120636 | MELK                     | 1.057616  | 1.293321 | -0.412905 | 0.05421415   |
| A_16_P18611738 | 9 | 36597648 | 36597707 | 23412  | MELK                     | 1.139446  | 1.505308 | -0.173563 | 0.37090704   |
| A_16_P18611762 | 9 | 36611606 | 36611665 | 128001 | MELK                     | 1.359695  | 1.645335 | 0.038395  | 0.60456073   |
| A_14_P139424   | 9 | 36620266 | 36620325 | 216861 | MELK                     | 1.44161   | 1.537519 | 0.105663  | 0.67256236   |
| A_16_P02096058 | 9 | 36627813 | 36627872 | 171096 | MELK                     | 0.911412  | 1.238913 | -0.549309 | 0.09805591   |
| A_16_P02096069 | 9 | 36633037 | 36633096 | 114863 | MELK                     | 1.326685  | 1.531554 | -0.10963  | 0.53382766   |
| A_16_P18611829 | 9 | 36641704 | 36641763 | 216017 | MELK                     | 1.411915  | 1.669174 | 0.007704  | 0.5098115    |
| A_14_P129125   | 9 | 36647230 | 36647289 | 214236 | MELK                     | 1.392269  | 1.650505 | 0.033178  | 0.519156     |
| A_14_P122061   | 9 | 36659337 | 36659396 | 218552 | MELK                     | 0.943342  | 1.286139 | -0.60294  | -0.043253228 |
| A_16_P18611891 | 9 | 36667505 | 36667564 | 108556 | MELK                     | 0.738726  | 1.050446 | -0.842323 | -0.33502096  |
| A_16_P18611911 | 9 | 36679951 | 36680010 | 195241 | chr9:036679951-036680010 | 1.511831  | 1.905972 | 0.060636  | 0.82505673   |
| A_16_P18611948 | 9 | 36698759 | 36698818 | 215858 | chr9:036698759-036698818 | 1.074852  | 1.26728  | -0.371707 | 0.07569949   |
| A_14_P120896   | 9 | 36739801 | 36739860 | 111427 | chr9:036739801-036739860 | 0.869896  | 1.179048 | -0.421088 | -0.13084102  |
| A_16_P18612146 | 9 | 36771961 | 36772020 | 166432 | chr9:036771961-036772020 | 1.01929   | 1.313672 | -0.307109 | 0.21782017   |
| A_16_P18612223 | 9 | 36799042 | 36799101 | 23567  | chr9:036799042-036799101 | 1.095023  | 1.538053 | -0.403098 | 0.2416465    |
| A_16_P02096327 | 9 | 36811789 | 36811848 | 51651  | chr9:036811789-036811848 | 1.437777  | 1.668616 | 0.270133  | 0.8007898    |
| A_16_P38710508 | 9 | 36823383 | 36823442 | 195236 | chr9:036823383-036823442 | 0.95177   | 1.215379 | -0.449507 | -0.006077871 |
| A_14_P114256   | 9 | 36829459 | 36829511 | 232405 | PAX5                     | 0.974837  | 1.35809  | 0.407702  | 0.77172977   |
| A_16_P02096373 | 9 | 36836481 | 36836540 | 100659 | PAX5                     | 1.447837  | 1.640305 | 0.128589  | 0.46322584   |
| A_16_P02096393 | 9 | 36847030 | 36847089 | 190270 | PAX5                     | 1.513708  | 1.959281 | 0.220363  | 0.84344596   |
| A_16_P18612396 | 9 | 36855705 | 36855759 | 102309 | PAX5                     | 0.883067  | 1.209335 | -0.539246 | -0.010923579 |
| A_16_P02096421 | 9 | 36861991 | 36862049 | 144666 | PAX5                     | 1.2377    | 1.361181 | -0.419855 | 0.1894482    |
| A_16_P02096437 | 9 | 36871298 | 36871357 | 73277  | PAX5                     | 0.893647  | 1.19854  | -0.53651  | 0.060437992  |
| A_14_P103517   | 9 | 36883592 | 36883651 | 4746   | PAX5                     | 1.253263  | 1.502569 | 0.007057  | 0.3680339    |
| A_16_P02096469 | 9 | 36889524 | 36889574 | 78506  | PAX5                     | 1.441462  | 1.706631 | 0.233255  | 0.5936339    |
| A_16_P18612515 | 9 | 36894709 | 36894768 | 62607  | PAX5                     | 0.320812  | 0.699589 | -0.976685 | -0.28560972  |
| A_16_P02096499 | 9 | 36907114 | 36907173 | 36446  | PAX5                     | 0.487716  | 0.716764 | -1.007454 | -0.56848794  |
| A_16_P18612561 | 9 | 36914227 | 36914286 | 114948 | PAX5                     | 1.816375  | 2.042985 | 0.610967  | 1.07833      |
| A_16_P02096518 | 9 | 36923170 | 36923229 | 206293 | PAX5                     | 1.415914  | 1.663112 | 0.075204  | 0.62762964   |
| A_14_P116847   | 9 | 36930263 | 36930322 | 85816  | PAX5                     | 1.501546  | 1.904849 | 0.307105  | 0.65865326   |
| A_16_P18612630 | 9 | 36936916 | 36936973 | 133335 | PAX5                     | 1.710123  | 1.621063 | 0.354998  | 0.63536847   |
| A_16_P02096554 | 9 | 36946292 | 36946351 | 226276 | PAX5                     | 0.869052  | 1.133472 | -0.54334  | -0.12789175  |
| A_16_P02096570 | 9 | 36956026 | 36956085 | 208714 | PAX5                     | 1.028677  | 1.372067 | -0.0927   | 0.41746837   |
| A_16_P02096584 | 9 | 36962443 | 36962502 | 1343   | PAX5                     | 0.739228  | 1.062575 | -0.681594 | -0.53303254  |
| A_16_P02096594 | 9 | 36970017 | 36970076 | 64122  | PAX5                     | 1.258078  | 1.531779 | -0.259986 | 0.22953556   |
| A_14_P111937   | 9 | 36982705 | 36982764 | 140496 | PAX5                     | 0.846011  | 1.081457 | -0.924176 | -0.31670964  |



|                |   |          |          |        |                          |          |          |           |              |
|----------------|---|----------|----------|--------|--------------------------|----------|----------|-----------|--------------|
| A_16_P02096625 | 9 | 36988315 | 36988374 | 154394 | PAX5                     | 0.604423 | 0.862883 | -0.768958 | -0.10319796  |
| A_16_P38711014 | 9 | 36996073 | 36996132 | 42447  | PAX5                     | 0.981647 | 1.352838 | -0.308097 | 0.26205313   |
| A_16_P38711066 | 9 | 37011020 | 37011079 | 196460 | PAX5                     | 0.814723 | 1.064212 | -0.652097 | -0.038499042 |
| A_14_P122903   | 9 | 37024017 | 37024074 | 64522  | PAX5                     | 1.2828   | 1.414369 | -0.062414 | 0.41391116   |
| A_16_P02096716 | 9 | 37031411 | 37031470 | 68830  | chr9:037031411-037031470 | 1.266282 | 1.551116 | 0.0806    | 0.27552316   |
| A_16_P02096730 | 9 | 37040721 | 37040780 | 104055 | chr9:037040721-037040780 | 0.386547 | 0.758067 | -0.789094 | -0.4088043   |
| A_16_P18611188 | 9 | 37047353 | 37047412 | 213336 | chr9:037047353-037047412 | 0.926387 | 1.259071 | -0.392599 | 0.06854729   |
| A_16_P18612985 | 9 | 37064720 | 37064779 | 148180 | chr9:037064720-037064779 | 1.071626 | 1.239237 | -0.357358 | -0.09366125  |
| A_16_P18613024 | 9 | 37077995 | 37078054 | 147159 | AK091718                 | 0.942889 | 1.347439 | -0.522487 | 0.17489566   |
| A_16_P02096787 | 9 | 37088566 | 37088625 | 42699  | chr9:037088566-037088625 | 1.540136 | 1.787943 | 0.20122   | 0.68889225   |
| A_16_P38711319 | 9 | 37102403 | 37102462 | 174233 | chr9:037102403-037102462 | 0.615461 | 0.976189 | -1.144243 | -0.32274425  |
| A_16_P38711346 | 9 | 37111904 | 37111963 | 6966   | ZCCHC7                   | 0.688419 | 0.859355 | -0.890367 | -0.9183574   |
| A_14_P119036   | 9 | 37119266 | 37119325 | 185316 | ZCCHC7                   | 1.435044 | 1.575854 | 0.167446  | 0.6463369    |
| A_16_P18613138 | 9 | 37124532 | 37124591 | 142625 | ZCCHC7                   | 0.97828  | 1.418247 | -0.296672 | 0.1238914    |
| A_16_P18613169 | 9 | 37134115 | 37134174 | 46978  | ZCCHC7                   | 0.677283 | 1.178982 | -0.881269 | -0.22373301  |
| A_14_P104590   | 9 | 37146161 | 37146220 | 233373 | ZCCHC7                   | 0.949345 | 1.417021 | -0.61417  | 0.07508625   |
| A_16_P18613232 | 9 | 37160701 | 37160760 | 56749  | ZCCHC7                   | 1.022024 | 1.240502 | -0.456527 | 0.0432899    |
| A_16_P18613253 | 9 | 37168248 | 37168307 | 219546 | ZCCHC7                   | 0.866425 | 1.231378 | -0.641972 | -0.17869851  |
| A_14_P103909   | 9 | 37176788 | 37176847 | 53114  | ZCCHC7                   | 0.864406 | 1.182629 | -0.498555 | 0.02604185   |
| A_16_P18613294 | 9 | 37182757 | 37182816 | 126146 | ZCCHC7                   | 0.545091 | 0.799163 | -1.038544 | -0.48715556  |
| A_16_P18613312 | 9 | 37187910 | 37187969 | 150232 | ZCCHC7                   | 1.338225 | 1.479366 | 0.051116  | 0.55071616   |
| A_16_P18613329 | 9 | 37192993 | 37193052 | 24571  | ZCCHC7                   | 0.791312 | 1.191797 | -0.788595 | -0.21953765  |
| A_16_P38711589 | 9 | 37200772 | 37200831 | 96783  | ZCCHC7                   | 1.355295 | 1.659518 | 0.026012  | 0.49110204   |
| A_16_P18613368 | 9 | 37209416 | 37209475 | 106597 | ZCCHC7                   | 1.036646 | 1.341274 | -0.386665 | 0.0586852    |
| A_16_P18613401 | 9 | 37226691 | 37226749 | 162238 | ZCCHC7                   | 1.395372 | 1.718601 | -0.019882 | 0.5310699    |
| A_14_P124730   | 9 | 37236517 | 37236576 | 216401 | ZCCHC7                   | 0.779461 | 0.988926 | -1.002552 | -0.2406643   |
| A_16_P38711719 | 9 | 37248872 | 37248931 | 22544  | ZCCHC7                   | 1.279445 | 1.639772 | -0.062389 | 0.5340715    |
| A_16_P02097053 | 9 | 37260341 | 37260400 | 14597  | ZCCHC7                   | 1.053223 | 1.056599 | -0.55442  | 0.033159465  |
| A_16_P18613515 | 9 | 37266871 | 37266930 | 32415  | ZCCHC7                   | 0.459198 | 0.885831 | -0.831114 | -0.40711063  |
| A_16_P18613533 | 9 | 37275940 | 37275999 | 118632 | ZCCHC7                   | 0.646067 | 0.95342  | -0.651028 | -0.22477362  |
| A_16_P38711794 | 9 | 37283189 | 37283248 | 73631  | ZCCHC7                   | 1.074969 | 1.377854 | -0.354167 | 0.30056125   |
| A_16_P02097087 | 9 | 37289058 | 37289117 | 166085 | ZCCHC7                   | 0.658625 | 1.050283 | -0.735796 | -0.020147428 |
| A_16_P18613581 | 9 | 37295493 | 37295552 | 71312  | ZCCHC7                   | 0.777897 | 1.073362 | -0.659375 | -0.050507664 |
| A_16_P18613620 | 9 | 37310700 | 37310759 | 27663  | ZCCHC7                   | 0.576252 | 0.861559 | -0.550552 | -0.03420435  |
| A_14_P120276   | 9 | 37317772 | 37317830 | 168494 | ZCCHC7                   | 1.033759 | 1.469016 | 0.037232  | 0.85727596   |
| A_16_P38711920 | 9 | 37323267 | 37323326 | 246    | ZCCHC7                   | 0.421907 | 0.650386 | -1.258314 | -0.57909656  |
| A_16_P18613690 | 9 | 37331060 | 37331119 | 202470 | ZCCHC7                   | 0.896396 | 1.193021 | -0.272545 | 0.67318934   |
| A_16_P38711981 | 9 | 37344820 | 37344879 | 217579 | ZCCHC7                   | 0.913167 | 1.299375 | -0.30414  | 0.4453943    |
| A_16_P02097210 | 9 | 37350875 | 37350930 | 38384  | chr9:037350875-037350930 | 1.375922 | 1.690399 | 0.057566  | 0.97593087   |
| A_16_P18613765 | 9 | 37359557 | 37359615 | 128052 | chr9:037359557-037359615 | 1.869764 | 2.240579 | 0.844513  | 1.5487715    |
| A_16_P18613788 | 9 | 37368352 | 37368411 | 224295 | chr9:037368352-037368411 | 1.690573 | 2.029734 | 0.468427  | 1.1898818    |
| A_16_P18613823 | 9 | 37383052 | 37383107 | 220254 | chr9:037383052-037383107 | 0.957681 | 1.334982 | -0.33246  | 0.38133135   |
| A_16_P02097273 | 9 | 37399663 | 37399716 | 118115 | chr9:037399663-037399716 | 1.071613 | 1.622889 | 0.012415  | 0.7883472    |
| A_16_P18613873 | 9 | 37409265 | 37409324 | 40297  | chr9:037409265-037409324 | 0.877505 | 1.215018 | -0.569972 | 0.35205385   |
| A_14_P139958   | 9 | 37413984 | 37414041 | 44694  | GRHPR                    | 0.775277 | 1.074293 | -0.76629  | -0.05692348  |
| A_14_P123966   | 9 | 37420750 | 37420802 | 52323  | GRHPR                    | 0.392109 | 0.86232  | -0.748103 | -0.032317534 |
| A_16_P02097308 | 9 | 37424741 | 37424800 | 214895 | GRHPR                    | 1.205549 | 1.52523  | -0.066406 | 0.8144246    |
| A_16_P18613943 | 9 | 37431328 | 37431387 | 91167  | ZBTB5                    | 1.26664  | 1.539813 | 0.006837  | 0.73118925   |
| A_16_P18613950 | 9 | 37436195 | 37436254 | 34093  | ZBTB5                    | 0.880193 | 1.194795 | -0.303944 | 0.39880818   |
| A_16_P18613961 | 9 | 37441638 | 37441697 | 29610  | ZBTB5                    | 0.94511  | 1.172457 | -0.617155 | 0.33784443   |
| A_14_P111385   | 9 | 37450967 | 37451026 | 165249 | ZBTB5                    | 0.820321 | 1.186162 | -0.383179 | 0.4303058    |
| A_16_P38712269 | 9 | 37457089 | 37457148 | 221969 | chr9:037457089-037457148 | 1.420131 | 1.659129 | 0.216396  | 0.8672151    |
| A_16_P38712275 | 9 | 37461467 | 37461526 | 89844  | chr9:037461467-037461526 | 0.781793 | 1.304663 | -0.24218  | 0.58447623   |
| A_16_P38712277 | 9 | 37466900 | 37466959 | 156501 | chr9:037466900-037466959 | 1.069998 | 1.277094 | -0.077512 | 0.7358637    |
| A_16_P02097364 | 9 | 37473968 | 37474027 | 115132 | chr9:037473968-037474027 | 0.860644 | 1.163429 | -0.877684 | 0.20418806   |
| A_14_P128488   | 9 | 37479286 | 37479345 | 173717 | POLR1E                   | 0.087187 | 0.703339 | -1.483648 | -0.6326822   |
| A_16_P38712335 | 9 | 37484804 | 37484863 | 109074 | POLR1E                   | 0.506711 | 1.355103 | -0.569446 | 0.6206759    |
| A_14_P136992   | 9 | 37491694 | 37491753 | 161643 | POLR1E                   | 1.060939 | 1.283364 | -0.65394  | 0.20486803   |
| A_16_P18614099 | 9 | 37500558 | 37500617 | 47932  | chr9:037500558-037500617 | 0.839157 | 1.090708 | -0.654916 | 0.25955674   |
| A_16_P02097417 | 9 | 37504917 | 37504976 | 129294 | FBXO10                   | 0.471913 | 0.988064 | -0.903939 | 0.006594285  |
| A_16_P02097430 | 9 | 37512446 | 37512505 | 61148  | FBXO10                   | 1.205225 | 1.448957 | -0.204206 | 0.5298563    |
| A_16_P38712438 | 9 | 37521213 | 37521272 | 152790 | FBXO10                   | 1.135318 | 1.394754 | -0.188268 | 0.45263156   |
| A_16_P18614176 | 9 | 37530101 | 37530160 | 128282 | FBXO10                   | 1.143562 | 1.17869  | -0.484301 | 0.30521604   |
| A_16_P18614192 | 9 | 37536639 | 37536698 | 186468 | FBXO10                   | 1.654165 | 1.78482  | 0.353837  | 1.0333686    |
| A_16_P02097469 | 9 | 37552759 | 37552818 | 8400   | FBXO10                   | 0.821289 | 1.251675 | -0.717651 | 0.18999961   |
| A_16_P38712514 | 9 | 37558585 | 37558644 | 102626 | FBXO10                   | 1.068976 | 1.271896 | -0.386674 | 0.41529903   |
| A_16_P18614230 | 9 | 37563876 | 37563935 | 90740  | FBXO10                   | 0.996383 | 1.298623 | -0.448143 | 0.51187384   |
| A_16_P18614252 | 9 | 37574431 | 37574490 | 225866 | BC125124                 | 0.99463  | 1.289049 | -0.205452 | 0.47518826   |
| A_16_P18614278 | 9 | 37586332 | 37586391 | 168858 | BX641092                 | 0.40544  | 0.685457 | -0.645533 | -0.27719384  |
| A_16_P18614278 | 9 | 37586332 | 37586391 | 4426   | BX641092                 | 0.516146 | 0.678313 | -0.657204 | -0.37500298  |
| A_16_P18614278 | 9 | 37586332 | 37586391 | 240268 | BX641092                 | 0.490527 | 0.704431 | -0.696926 | -0.23464498  |
| A_16_P02097525 | 9 | 37597403 | 37597462 | 130946 | BX641092                 | 1.108877 | 1.34412  | -0.226673 | 0.5284543    |
| A_16_P18614327 | 9 | 37606590 | 37606649 | 72852  | BX641092                 | 1.404043 | 1.842754 | 0.203747  | 1.0854285    |

|                |   |          |          |        |                          |          |          |           |              |
|----------------|---|----------|----------|--------|--------------------------|----------|----------|-----------|--------------|
| A_16_P38712653 | 9 | 37614940 | 37614999 | 143332 | BX641092                 | 0.903484 | 1.22009  | -0.459548 | 0.3177582    |
| A_16_P18614395 | 9 | 37630509 | 37630568 | 127796 | BX641092                 | 1.133299 | 1.507586 | -0.094473 | 0.5769031    |
| A_16_P18614413 | 9 | 37637161 | 37637220 | 217801 | BX641092                 | 1.145996 | 1.437493 | -0.303906 | 0.42986614   |
| A_14_P126555   | 9 | 37650527 | 37650586 | 48816  | FRMPD1                   | 1.056504 | 1.318562 | -0.456228 | 0.34590346   |
| A_16_P18614476 | 9 | 37658702 | 37658761 | 161535 | FRMPD1                   | 0.943973 | 1.27909  | -0.161699 | 0.47112986   |
| A_16_P02097637 | 9 | 37671577 | 37671636 | 226651 | FRMPD1                   | 0.477776 | 0.724985 | -0.903458 | 0.019222543  |
| A_16_P18614540 | 9 | 37686619 | 37686678 | 144643 | FRMPD1                   | 0.710962 | 1.075648 | -0.867802 | 0.22678392   |
| A_16_P38712857 | 9 | 37695120 | 37695179 | 35170  | FRMPD1                   | 0.474155 | 0.799621 | -1.144359 | -0.0750643   |
| A_14_P109933   | 9 | 37701328 | 37701386 | 221496 | FRMPD1                   | 1.405249 | 1.722157 | -0.048981 | 0.85163844   |
| A_16_P02097694 | 9 | 37708444 | 37708500 | 30669  | FRMPD1                   | 1.416673 | 1.636995 | -0.021172 | 0.8947182    |
| A_16_P02097713 | 9 | 37718298 | 37718357 | 218809 | FRMPD1                   | 1.056501 | 1.435809 | -0.210456 | 0.4560584    |
| A_16_P02097722 | 9 | 37723479 | 37723538 | 68912  | FRMPD1                   | 1.072387 | 1.289138 | -0.367522 | 0.41487595   |
| A_16_P02097744 | 9 | 37737041 | 37737100 | 46468  | BX641092                 | 1.109985 | 1.617355 | -0.074753 | 0.60193396   |
| A_16_P18614704 | 9 | 37746137 | 37746196 | 68974  | RG9MTD3                  | 0.857157 | 1.196047 | -0.472081 | 0.32316023   |
| A_14_P134578   | 9 | 37750851 | 37750910 | 234798 | RG9MTD3                  | 1.009004 | 1.263005 | -0.385281 | 0.42494798   |
| A_14_P137395   | 9 | 37757134 | 37757193 | 149067 | RG9MTD3                  | 1.318352 | 1.450208 | -0.187759 | 0.5179629    |
| A_16_P38713046 | 9 | 37760988 | 37761047 | 60374  | RG9MTD3                  | 0.950325 | 1.166473 | -0.654801 | 0.27368543   |
| A_16_P38713051 | 9 | 37765306 | 37765365 | 90521  | RG9MTD3                  | 1.059887 | 1.355812 | -0.513344 | 0.47184438   |
| A_14_P132980   | 9 | 37768581 | 37768640 | 232972 | RG9MTD3                  | 0.446836 | 0.759697 | -1.397625 | -0.43179184  |
| A_14_P123135   | 9 | 37771956 | 37772013 | 203155 | EXOSC3                   | 1.011852 | 1.462809 | 0.101971  | 0.7052917    |
| A_16_P38713104 | 9 | 37779564 | 37779623 | 135325 | BX641092                 | 1.118273 | 1.432683 | -0.069576 | 0.5676834    |
| A_16_P38713114 | 9 | 37787346 | 37787405 | 164207 | BX641092                 | 1.091803 | 1.45916  | -0.305021 | 0.5091109    |
| A_16_P18614825 | 9 | 37797384 | 37797443 | 103142 | WDR32                    | 0.916575 | 1.211813 | -0.609063 | 0.39223647   |
| A_16_P02097832 | 9 | 37809296 | 37809355 | 236287 | WDR32                    | 0.84253  | 1.153105 | -0.662781 | 0.3293443    |
| A_16_P18614852 | 9 | 37818647 | 37818706 | 186670 | WDR32                    | 1.225036 | 1.55684  | -0.242619 | 0.78127444   |
| A_16_P38713201 | 9 | 37832125 | 37832184 | 176147 | WDR32                    | 0.70455  | 1.106974 | -0.73357  | 0.22304022   |
| A_14_P105464   | 9 | 37847269 | 37847328 | 131762 | WDR32                    | 0.954136 | 1.247955 | -0.555105 | 0.3382335    |
| A_16_P18614927 | 9 | 37855943 | 37856002 | 173227 | WDR32                    | 0.678698 | 1.241289 | -0.500835 | 0.2815544    |
| A_16_P02097902 | 9 | 37865924 | 37865983 | 80023  | BC094765                 | 0.758515 | 1.072303 | -0.830405 | 0.057510823  |
| A_16_P18614990 | 9 | 37875916 | 37875968 | 2257   | BC094765                 | 0.911753 | 1.166849 | -0.241448 | 0.9611118    |
| A_14_P101687   | 9 | 37883635 | 37883694 | 1445   | MCART1                   | 1.595615 | 1.736958 | 0.100415  | 1.004695     |
| A_16_P18615020 | 9 | 37887713 | 37887772 | 145513 | MCART1                   | 0.611838 | 1.09497  | -0.724605 | 0.058046892  |
| A_16_P18615030 | 9 | 37892684 | 37892743 | 236336 | MCART1                   | 0.455634 | 0.982159 | -0.84858  | -0.06133473  |
| A_16_P18615050 | 9 | 37898880 | 37898939 | 125353 | BC094765                 | 0.462706 | 0.898469 | -0.931518 | -1.70E-04    |
| A_16_P18615068 | 9 | 37905941 | 37906000 | 79376  | SHB                      | 0.982739 | 1.194805 | -0.589376 | 0.14661214   |
| A_14_P103259   | 9 | 37911524 | 37911583 | 185485 | SHB                      | 1.263037 | 1.492095 | -0.32691  | 0.66306275   |
| A_16_P18615116 | 9 | 37920602 | 37920661 | 240823 | SHB                      | 1.506831 | 1.877842 | 0.282091  | 1.106086     |
| A_16_P38713460 | 9 | 37926418 | 37926477 | 121395 | SHB                      | 0.475318 | 0.825258 | -0.994133 | -0.047971696 |
| A_16_P18615148 | 9 | 37932049 | 37932108 | 83751  | SHB                      | 0.962954 | 1.276931 | -0.415191 | 0.4041179    |
| A_16_P18615187 | 9 | 37943429 | 37943488 | 104791 | SHB                      | 1.254519 | 1.885622 | 0.126844  | 1.1056445    |
| A_16_P18615210 | 9 | 37950005 | 37950064 | 7667   | SHB                      | 0.766586 | 1.130701 | -0.602471 | 0.23041259   |
| A_16_P02098061 | 9 | 37958704 | 37958763 | 147566 | SHB                      | 0.94921  | 1.215945 | -0.580616 | 0.3785014    |
| A_16_P02098083 | 9 | 37969174 | 37969233 | 85971  | SHB                      | 0.988092 | 1.171521 | -0.505676 | 0.25070316   |
| A_16_P02098088 | 9 | 37974549 | 37974608 | 172135 | SHB                      | 1.11505  | 1.587263 | -0.204803 | 0.6026583    |
| A_16_P38713631 | 9 | 37980994 | 37981053 | 179781 | SHB                      | 1.016422 | 1.252169 | -0.573041 | 0.45867866   |
| A_14_P139815   | 9 | 37988780 | 37988839 | 178444 | SHB                      | 1.193752 | 1.139829 | -0.644022 | -0.17292884  |
| A_16_P02098144 | 9 | 37999670 | 37999729 | 52333  | SHB                      | 1.441805 | 1.861822 | 0.341781  | 1.1226857    |
| A_16_P02098166 | 9 | 38008959 | 38009018 | 39078  | SHB                      | 1.386478 | 1.67179  | -0.221181 | 0.6094879    |
| A_16_P02098178 | 9 | 38015085 | 38015144 | 124924 | SHB                      | 1.363863 | 1.627385 | -0.047745 | 0.92556477   |
| A_16_P18615446 | 9 | 38021514 | 38021573 | 1633   | SHB                      | 1.493715 | 1.765579 | 0.02071   | 0.94963807   |
| A_16_P02098220 | 9 | 38035621 | 38035680 | 72976  | SHB                      | 1.086534 | 1.488656 | -0.340871 | 0.61030245   |
| A_14_P132368   | 9 | 38040719 | 38040778 | 83085  | SHB                      | 0.766095 | 1.106823 | -0.899072 | 0.024140373  |
| A_16_P02098240 | 9 | 38047669 | 38047728 | 213532 | SHB                      | 1.402557 | 1.713127 | 0.034901  | 1.0199187    |
| A_16_P38713874 | 9 | 38054102 | 38054161 | 230690 | SHB                      | 0.311019 | 0.750691 | -1.383177 | -0.6139715   |
| A_16_P18615567 | 9 | 38060753 | 38060812 | 185941 | chr9:038060753-038060812 | 0.998674 | 1.467734 | -0.311348 | 0.5586506    |
| A_16_P02098272 | 9 | 38072435 | 38072494 | 205841 | chr9:038072435-038072494 | 1.63661  | 1.930126 | 0.259941  | 0.9465118    |
| A_16_P18615622 | 9 | 38087120 | 38087177 | 32335  | chr9:038087120-038087177 | 1.327278 | 1.633514 | -0.148088 | 0.7202198    |
| A_16_P18615723 | 9 | 38133648 | 38133707 | 117149 | AK057054                 | 1.082142 | 1.387595 | -0.367039 | 0.6334517    |
| A_16_P18615754 | 9 | 38147599 | 38147658 | 41207  | AK057054                 | 1.198201 | 1.5615   | -0.240917 | 0.66266763   |
| A_16_P02098392 | 9 | 38157686 | 38157745 | 191925 | AK057054                 | 1.100358 | 1.318877 | -0.445065 | 0.41956156   |
| A_16_P02098403 | 9 | 38168408 | 38168467 | 123320 | AK057054                 | 0.741502 | 1.203487 | -0.667415 | 0.22257459   |
| A_16_P02098420 | 9 | 38182580 | 38182639 | 123193 | AK057054                 | 1.282766 | 1.709662 | -0.309963 | 0.8074599    |
| A_16_P18615868 | 9 | 38195626 | 38195685 | 180281 | chr9:038195626-038195685 | 0.21845  | 0.537444 | -1.401129 | -0.30847424  |
| A_16_P18615894 | 9 | 38214865 | 38214924 | 119199 | chr9:038214865-038214924 | 1.229763 | 1.503923 | -0.32643  | 0.74134636   |
| A_16_P18615963 | 9 | 38245139 | 38245198 | 210041 | chr9:038245139-038245198 | 1.070213 | 1.599394 | -0.044833 | 0.77520096   |
| A_16_P38714348 | 9 | 38273587 | 38273646 | 139587 | chr9:038273587-038273646 | 0.818964 | 1.561087 | -0.114423 | 0.41946927   |
| A_16_P18616114 | 9 | 38324253 | 38324312 | 14484  | chr9:038324253-038324312 | 0.986841 | 1.34368  | -0.54725  | 0.36059564   |
| A_14_P102076   | 9 | 38343993 | 38344052 | 179663 | chr9:038343993-038344052 | 1.305728 | 1.764833 | -0.07021  | 0.74437696   |
| A_16_P02098644 | 9 | 38356682 | 38356741 | 228596 | chr9:038356682-038356741 | 0.54396  | 0.932904 | -1.030445 | -0.109822094 |
| A_16_P38714577 | 9 | 38370537 | 38370596 | 204988 | chr9:038370537-038370596 | 1.241104 | 1.424924 | -0.552574 | 0.4701093    |
| A_16_P02098672 | 9 | 38376255 | 38376312 | 156917 | chr9:038376255-038376312 | 1.270007 | 1.351703 | -0.470401 | 0.56398535   |
| A_16_P38714611 | 9 | 38381821 | 38381880 | 42552  | chr9:038381821-038381880 | 1.554827 | 1.871497 | 0.142555  | 1.0063016    |
| A_14_P200254   | 9 | 38387399 | 38387458 | 125097 | ALDH1B1                  | 1.397144 | 1.818262 | 0.237174  | 1.1046143    |

|                |   |          |          |        |                          |           |           |           |              |
|----------------|---|----------|----------|--------|--------------------------|-----------|-----------|-----------|--------------|
| A_14_P134247   | 9 | 38388612 | 38388671 | 73885  | ALDH1B1                  | 1.413709  | 1.796532  | 0.10831   | 1.1811619    |
| A_16_P18616308 | 9 | 38393205 | 38393251 | 4219   | chr9:038393205-038393251 | 1.014802  | 1.292464  | -0.678901 | 0.090202846  |
| A_16_P18616308 | 9 | 38393205 | 38393251 | 27256  | chr9:038393205-038393251 | 0.866683  | 1.145611  | -0.53637  | -0.012564004 |
| A_16_P18616308 | 9 | 38393205 | 38393251 | 187390 | chr9:038393205-038393251 | 0.912663  | 1.355723  | -0.678504 | 0.15860783   |
| A_16_P02098711 | 9 | 38398978 | 38399037 | 128786 | IGFBPL1                  | 1.114671  | 1.426869  | -0.608703 | 0.48151675   |
| A_16_P38714682 | 9 | 38401861 | 38401920 | 93944  | IGFBPL1                  | 1.442239  | 1.781456  | 0.111917  | 1.0243752    |
| A_16_P02098725 | 9 | 38405146 | 38405205 | 146511 | IGFBPL1                  | 1.278657  | 1.728739  | -0.126421 | 0.7782056    |
| A_16_P18616363 | 9 | 38409583 | 38409642 | 228276 | IGFBPL1                  | 0.767828  | 1.171894  | -0.807187 | 0.1428745    |
| A_16_P18616383 | 9 | 38417051 | 38417110 | 201221 | chr9:038417051-038417110 | 1.18571   | 1.535322  | -0.324608 | 0.56366277   |
| A_16_P02098750 | 9 | 38423625 | 38423684 | 109463 | chr9:038423625-038423684 | 0.582976  | 0.499827  | -0.767897 | 0.5302828    |
| A_16_P02098767 | 9 | 38435900 | 38435959 | 100742 | chr9:038435900-038435959 | 0.829452  | 1.331857  | -0.611878 | 0.40836486   |
| A_16_P18616450 | 9 | 38449475 | 38449534 | 108356 | chr9:038449475-038449534 | 1.274886  | 1.851008  | 0.170469  | 1.0372651    |
| A_16_P18616468 | 9 | 38461231 | 38461290 | 217220 | chr9:038461231-038461290 | 1.182074  | 1.507937  | -0.154905 | 0.87417555   |
| A_16_P02098799 | 9 | 38471288 | 38471347 | 55679  | chr9:038471288-038471347 | 0.850805  | 1.045631  | -0.631502 | 0.27965677   |
| A_16_P02098802 | 9 | 38477170 | 38477221 | 212313 | chr9:038477170-038477221 | 1.209116  | 1.418175  | -0.100618 | 0.6779528    |
| A_16_P02098814 | 9 | 38494864 | 38494913 | 85254  | chr9:038494864-038494913 | 0.937008  | 1.337327  | -0.039831 | 0.7869898    |
| A_16_P38714912 | 9 | 38511130 | 38511189 | 227402 | chr9:038511130-038511189 | 0.135153  | 0.380462  | -1.007215 | -0.22592267  |
| A_16_P02098827 | 9 | 38519751 | 38519810 | 41653  | chr9:038519751-038519810 | 1.404852  | 1.618033  | -0.120063 | 0.96747154   |
| A_14_P117703   | 9 | 38526827 | 38526886 | 49387  | chr9:038526827-038526886 | 1.348846  | 1.669372  | -0.162092 | 0.8010386    |
| A_16_P02098829 | 9 | 38526930 | 38526989 | 194342 | chr9:038526930-038526989 | 0.920919  | 1.257265  | -0.402694 | 0.41120932   |
| A_16_P38714997 | 9 | 38561787 | 38561846 | 131386 | AK093059                 | 0.413499  | 0.972416  | -0.516012 | -0.004912302 |
| A_16_P18616706 | 9 | 38589898 | 38589957 | 56677  | AB095935                 | 0.200444  | 0.532346  | -0.529606 | -0.03555633  |
| A_16_P02098849 | 9 | 38605688 | 38605735 | 135778 | AB095935                 | 0.63723   | 0.965062  | -0.483526 | 0.2289273    |
| A_14_P125308   | 9 | 38612201 | 38612248 | 95730  | BC041970                 | 0.845772  | 0.585929  | -0.208334 | -0.26851773  |
| A_16_P38715186 | 9 | 38627337 | 38627396 | 41522  | chr9:038627337-038627396 | 0.895686  | 1.083711  | -0.514671 | 0.100831434  |
| A_16_P02098880 | 9 | 38638149 | 38638208 | 124832 | chr9:038638149-038638208 | 0.934471  | 1.237504  | -0.413943 | 0.4663925    |
| A_14_P125020   | 9 | 38653212 | 38653271 | 63810  | chr9:038653212-038653271 | 0.429153  | 0.811318  | -0.903461 | -0.22676474  |
| A_16_P02098970 | 9 | 38693993 | 38694052 | 214628 | chr9:038693993-038694052 | 1.014347  | 1.333938  | -0.351154 | 0.4084046    |
| A_16_P18617088 | 9 | 38731378 | 38731437 | 201818 | chr9:038731378-038731437 | 0.547004  | 0.878221  | -0.694617 | 0.06061861   |
| A_14_P108800   | 9 | 38758232 | 38758291 | 242492 | chr9:038758232-038758291 | 0.515551  | 0.726827  | -0.963377 | -0.35120958  |
| A_16_P02099082 | 9 | 38805416 | 38805475 | 57493  | chr9:038805416-038805475 | 0.101079  | -0.038516 | -0.563877 | -0.13635331  |
| A_16_P02099102 | 9 | 39049899 | 39049958 | 203449 | chr9:039049899-039049958 | 0.764217  | 1.057842  | -0.297657 | 0.46691635   |
| A_16_P02099105 | 9 | 39062229 | 39062288 | 139623 | chr9:039062229-039062288 | 0.317681  | 0.212601  | -0.08766  | -0.3097332   |
| A_16_P02099121 | 9 | 39131835 | 39131894 | 81940  | CNTNAP3                  | -0.440287 | 0.168069  | -2.008819 | -1.1952134   |
| A_16_P38716358 | 9 | 39141696 | 39141755 | 164243 | CNTNAP3                  | 0.218285  | 0.138869  | -0.695031 | -0.21368682  |
| A_14_P128926   | 9 | 39146895 | 39146954 | 214759 | CNTNAP3                  | 0.448576  | 0.722016  | -0.659113 | 0.030034497  |
| A_16_P18617980 | 9 | 39157302 | 39157361 | 174804 | CNTNAP3                  | 0.048565  | 1.090188  | -0.68059  | 1.6020843    |
| A_16_P38716431 | 9 | 39167063 | 39167122 | 57598  | CNTNAP3                  | 0.394934  | 0.772932  | -0.605451 | -0.05562842  |
| A_16_P02099130 | 9 | 39244329 | 39244388 | 222267 | CNTNAP3                  | 0.452035  | 0.771431  | -0.408347 | -0.0669637   |
| A_16_P02099132 | 9 | 39355550 | 39355594 | 51452  | chr9:039355550-039355594 | 1.352423  | 1.460826  | 0.58456   | 1.3494517    |
| A_16_P02099137 | 9 | 39884879 | 39884938 | 63546  | BC018886                 | 0.633083  | 0.850296  | -0.483056 | 0.09375637   |
| A_16_P02099148 | 9 | 40622401 | 40622460 | 84400  | AK024257                 | 0.161272  | -0.473627 | -0.120296 | -0.02043572  |
| A_16_P18620488 | 9 | 40761173 | 40761232 | 184550 | BC031626                 | 0.358604  | -0.162593 | 0.389152  | 0.23216137   |
| A_16_P02099154 | 9 | 40764105 | 40764164 | 10597  | ZNF658                   | 0.158309  | 0.222516  | -0.417783 | -0.013997525 |
| A_16_P02099156 | 9 | 40781464 | 40781509 | 95308  | ZNF658                   | 0.397065  | 0.17221   | 0.174763  | 0.27912277   |
| A_16_P38720805 | 9 | 41543069 | 41543128 | 88879  | chr9:041543069-041543128 | 0.763319  | 1.099333  | -0.075998 | 0.52816904   |
| A_16_P18623184 | 9 | 41970428 | 41970483 | 188573 | AY098594                 | 0.516731  | -3.621418 | -1.501399 | -0.42061716  |
| A_16_P18629813 | 9 | 42348957 | 42349016 | 862    | CR933660                 | 0.440502  | 0.260796  | 0.054577  | 0.27099156   |
| A_16_P38728572 | 9 | 42362628 | 42362687 | 215871 | ANKRD20A3                | -0.03452  | 0.105081  | -1.284909 | -0.66363037  |
| A_16_P02099338 | 9 | 42903050 | 42903109 | 53518  | chr9:042903050-042903109 | 0.160233  | 0.418136  | -0.383574 | 0.41137064   |
| A_16_P38727881 | 9 | 43165653 | 43165711 | 229465 | chr9:043165653-043165711 | 0.428331  | 0.645621  | -0.402033 | 0.1844094    |
| A_16_P02099193 | 9 | 43445839 | 43445894 | 45934  | chr9:043445839-043445894 | 0.850992  | 1.065621  | -0.462805 | 0.4209935    |
| A_16_P02099208 | 9 | 43530076 | 43530135 | 157928 | chr9:043530076-043530135 | 1.010079  | 1.196466  | 0.233619  | 0.7975872    |
| A_16_P02099210 | 9 | 43550676 | 43550735 | 134715 | chr9:043550676-043550735 | 0.258392  | 0.466255  | -0.790253 | -0.13362187  |
| A_16_P18625348 | 9 | 43599449 | 43599508 | 163529 | chr9:043599449-043599508 | 0.433325  | 1.158087  | -1.005487 | -0.23701644  |
| A_16_P38723984 | 9 | 43626920 | 43626970 | 50734  | AK024257                 | 1.028509  | 1.596724  | 0.18008   | 0.9206197    |
| A_16_P02099244 | 9 | 44167273 | 44167323 | 227316 | chr9:044167273-044167323 | 0.522338  | 1.017371  | -0.726694 | -0.020341173 |
| A_16_P02099251 | 9 | 44199401 | 44199460 | 52968  | AY098593                 | 0.830427  | 0.75216   | 0.264103  | -0.48621225  |
| A_16_P38725280 | 9 | 44669464 | 44669508 | 27414  | chr9:044669464-044669508 | 1.333151  | 1.376842  | 0.569648  | 1.6430545    |
| A_16_P38725612 | 9 | 44810117 | 44810171 | 175899 | chr9:044810117-044810171 | 0.864105  | 1.208118  | 0.75969   | 1.038185     |
| A_16_P02099295 | 9 | 45419207 | 45419264 | 143135 | BC006438                 | 0.355328  | 0.249589  | -0.119985 | -0.15446687  |
| A_16_P38726904 | 9 | 46018067 | 46018111 | 53885  | chr9:046018067-046018111 | 0.801842  | 1.412911  | 0.64871   | 0.84056735   |
| A_16_P41916171 | 9 | 47002187 | 47002237 | 127459 | chr9:047002187-047002237 | 0.892475  | 1.312598  | 0.052504  | 1.0928931    |

Supplementary Table 1B: Array CGH data on chromosome 9p using Agilent 44K chip

| Probe Name   | Chr Name | Start   | Stop    | Feature num | Name of Gene             | SUM-149   | SUM-44   | SUM-52    | SUM-190   | SUM-225   |
|--------------|----------|---------|---------|-------------|--------------------------|-----------|----------|-----------|-----------|-----------|
| A_14_P110624 | 9        | 204367  | 204426  | 36322       | C9orf66                  | -0.570681 | -0.83489 | -0.454742 | -0.700998 | -0.852851 |
| A_14_P114068 | 9        | 322456  | 322515  | 35902       | DOCK8                    | -0.092361 | -0.20002 | 0.055988  | -0.348085 | 0.174027  |
| A_14_P135177 | 9        | 601628  | 601687  | 1401        | ANKRD15                  | -0.719249 | -0.95663 | -0.29974  | -0.558884 | -0.687276 |
| A_14_P101255 | 9        | 720034  | 720088  | 20758       | ANKRD15                  | 0.073144  | -0.29528 | -0.053363 | -0.198396 | -0.240568 |
| A_14_P134606 | 9        | 752947  | 753006  | 24224       | chr9:000752947-000753006 | -0.423089 | -0.6533  | -0.289181 | -0.496513 | -0.513842 |
| A_14_P137073 | 9        | 855779  | 855838  | 36561       | DMRT1                    | -0.359901 | -0.59634 | -0.330298 | -0.569239 | -0.480197 |
| A_14_P121763 | 9        | 883500  | 883559  | 165         | DMRT1                    | -0.161399 | -0.67298 | -0.439137 | -0.661137 | -0.832795 |
| A_14_P115828 | 9        | 973204  | 973263  | 40577       | DMRT3                    | -0.172364 | -0.97905 | -0.069188 | -0.269635 | 0.161656  |
| A_14_P132576 | 9        | 979894  | 979953  | 19870       | DMRT3                    | -0.506397 | -0.99739 | -0.411823 | -0.366805 | -0.494345 |
| A_14_P121618 | 9        | 980025  | 980073  | 24079       | DMRT3                    | -0.00129  | -0.62631 | -0.306326 | -0.258358 | -0.150231 |
| A_14_P113138 | 9        | 1046309 | 1046368 | 36249       | DMRT2                    | -0.607035 | -0.96924 | -0.29737  | -0.602199 | -0.624311 |
| A_14_P135575 | 9        | 1147109 | 1147168 | 30941       | chr9:001147109-001147168 | -0.487817 | -0.56158 | -0.68925  | -0.922933 | -0.123103 |
| A_14_P112976 | 9        | 1352641 | 1352700 | 11700       | chr9:001352641-001352700 | 0.442274  | -0.35966 | -0.56011  | -0.555416 | -0.115669 |
| A_14_P134334 | 9        | 1569408 | 1569467 | 21654       | chr9:001569408-001569467 | -0.489703 | -0.68883 | -1.252002 | -0.697775 | -0.522385 |
| A_14_P123587 | 9        | 1728515 | 1728574 | 41151       | chr9:001728515-001728574 | 0.140422  | -0.04914 | 0.066516  | -0.169643 | 0.066934  |
| A_14_P110528 | 9        | 1972355 | 1972414 | 11472       | chr9:001972355-001972414 | -0.318621 | -1.02676 | -0.87228  | -0.825305 | -0.941973 |
| A_14_P112263 | 9        | 2029442 | 2029500 | 14674       | SMARCA2                  | -0.719355 | -1.09632 | -0.903408 | -0.981466 | -0.781945 |
| A_14_P112573 | 9        | 2078528 | 2078587 | 26194       | SMARCA2                  | -0.591081 | -1.34629 | -0.769962 | -0.902063 | -1.099699 |
| A_14_P132731 | 9        | 2109502 | 2109561 | 41311       | SMARCA2                  | -0.468909 | -0.26215 | -0.207335 | -0.273792 | 0.028297  |
| A_14_P123409 | 9        | 2182590 | 2182649 | 9337        | SMARCA2                  | -0.439931 | -0.88054 | -0.336255 | -0.386634 | -0.49293  |
| A_14_P105740 | 9        | 2408075 | 2408134 | 39669       | chr9:002408075-002408134 | -0.343949 | -0.32749 | -0.199568 | -0.159974 | 0.121031  |
| A_14_P109730 | 9        | 2525632 | 2525691 | 19813       | AX747488                 | -0.986705 | -0.81941 | -0.680693 | -0.8465   | -1.230544 |
| A_14_P130747 | 9        | 2615492 | 2615551 | 10363       | VLDLR                    | -0.759276 | -0.86359 | -0.601145 | -0.745038 | -0.870176 |
| A_14_P109602 | 9        | 2619346 | 2619405 | 21421       | VLDLR                    | -0.330684 | -0.75845 | -0.205498 | -0.430259 | -0.214847 |
| A_14_P108753 | 9        | 2709261 | 2709320 | 24281       | KCNV2                    | -0.535401 | -0.51148 | -0.157834 | -0.345555 | -0.135158 |
| A_14_P121559 | 9        | 2822701 | 2822760 | 12012       | KIAA0020                 | -0.24309  | -0.59323 | -0.317911 | -0.496677 | -0.328769 |
| A_14_P121347 | 9        | 2906200 | 2906259 | 17913       | chr9:002906200-002906259 | -0.680353 | -0.82164 | -0.284985 | -0.512542 | -0.16947  |
| A_14_P138223 | 9        | 3187162 | 3187221 | 7559        | BC041456                 | -0.425512 | -0.42695 | -0.257963 | -0.440196 | -0.081523 |
| A_14_P129070 | 9        | 3237110 | 3237169 | 19345       | RFX3                     | -0.599708 | -0.69002 | -0.5309   | -0.95961  | -0.222722 |
| A_14_P112297 | 9        | 3336643 | 3336702 | 24325       | RFX3                     | -0.884061 | -0.68268 | -0.577302 | -0.96495  | -0.364323 |
| A_14_P101607 | 9        | 3385562 | 3385616 | 29342       | RFX3                     | -0.791118 | -0.7935  | -0.830606 | -0.799612 | -0.856784 |
| A_14_P122241 | 9        | 3470606 | 3470665 | 26881       | RFX3                     | -1.026703 | -1.15581 | -1.14746  | -1.053224 | -0.835398 |
| A_14_P128525 | 9        | 3509377 | 3509436 | 25091       | RFX3                     | -0.970137 | -1.02893 | -0.840039 | -0.853829 | -0.21962  |
| A_14_P110000 | 9        | 3718444 | 3718503 | 34812       | chr9:003718444-003718503 | -0.568172 | -1.08973 | -0.829493 | -0.64569  | -0.743734 |
| A_14_P109891 | 9        | 3817677 | 3817736 | 40083       | GLIS3                    | -0.461442 | -0.74724 | -0.54405  | -0.262421 | -0.630742 |
| A_14_P138328 | 9        | 3888848 | 3888894 | 2598        | GLIS3                    | -0.520856 | -0.67377 | -0.685012 | -0.603228 | -0.397249 |
| A_14_P104307 | 9        | 3922332 | 3922391 | 35691       | GLIS3                    | -0.168444 | -0.66154 | -0.50738  | -0.229934 | -0.593677 |
| A_14_P122098 | 9        | 4002525 | 4002584 | 34475       | GLIS3                    | -0.42751  | -0.43299 | -0.469566 | -0.335613 | -0.329051 |
| A_14_P100760 | 9        | 4142060 | 4142119 | 11478       | GLIS3                    | -0.433752 | -0.86028 | -0.718641 | -0.607062 | -0.709334 |
| A_14_P113556 | 9        | 4434820 | 4434879 | 12394       | chr9:004434820-004434879 | -0.434811 | -0.67155 | -0.898897 | -1.050239 | -0.745066 |
| A_14_P102455 | 9        | 4488207 | 4488266 | 44284       | SLC1A1                   | -0.487463 | -0.52536 | -0.426155 | -0.65925  | -0.332014 |
| A_14_P131198 | 9        | 4518230 | 4518289 | 31011       | SLC1A1                   | -0.206191 | -0.24821 | -0.393458 | -0.283872 | -0.37016  |
| A_14_P117164 | 9        | 4565987 | 4566046 | 36770       | SLC1A1                   | -0.09497  | -0.526   | -0.412354 | -0.532462 | -0.635394 |
| A_14_P105964 | 9        | 4577083 | 4577142 | 7623        | SLC1A1                   | -0.051104 | -0.47376 | -0.461192 | -1.662241 | -0.514832 |
| A_14_P121350 | 9        | 4617565 | 4617624 | 12106       | C9orf68                  | -0.288967 | -0.55885 | -0.212891 | -0.395616 | -0.532654 |
| A_14_P132707 | 9        | 4687068 | 4687127 | 23055       | CDC37L1                  | -0.771427 | -1.57426 | -1.365456 | -0.993018 | -1.510421 |
| A_14_P115092 | 9        | 4714235 | 4714294 | 30772       | AK3L1                    | -0.415086 | -0.74584 | -0.570402 | -0.464125 | -0.31314  |
| A_14_P107187 | 9        | 4730392 | 4730451 | 36908       | AK3L1                    | -0.39512  | -0.82349 | -0.408569 | 0.032277  | -0.256441 |
| A_14_P125252 | 9        | 4784084 | 4784143 | 22515       | RCL1                     | -0.5714   | -0.48083 | -0.289591 | -0.224089 | -0.327675 |
| A_14_P123360 | 9        | 4850997 | 4851056 | 3655        | RCL1                     | -0.297951 | -0.31902 | -0.145499 | -0.458519 | -0.321895 |
| A_14_P105543 | 9        | 5012053 | 5012112 | 1877        | JAK2                     | -0.732995 | -1.03149 | -0.546224 | -0.846601 | -1.104635 |
| A_14_P127099 | 9        | 5117767 | 5117826 | 18139       | JAK2                     | -0.184694 | -1.04851 | -0.272016 | -0.39572  | -0.378371 |
| A_14_P136058 | 9        | 5117827 | 5117886 | 43008       | JAK2                     | -0.391289 | -1.04943 | -0.610456 | -0.508747 | -0.683283 |
| A_14_P110162 | 9        | 5155709 | 5155768 | 32777       | INSL6                    | -0.700581 | -1.15708 | -0.360135 | -0.731036 | -0.479643 |
| A_14_P132861 | 9        | 5221815 | 5221874 | 24828       | INSL4                    | -1.024809 | -0.87901 | -0.700418 | -1.024954 | -0.558721 |
| A_14_P116102 | 9        | 5289937 | 5289996 | 8419        | RLN2                     | -0.713259 | -1.40414 | -0.800913 | -0.784634 | -0.861408 |
| A_14_P114773 | 9        | 5325065 | 5325124 | 11668       | RLN1                     | -0.783731 | -1.21552 | -0.852027 | -0.824943 | -0.880226 |
| A_14_P116588 | 9        | 5410412 | 5410471 | 38444       | C9orf46                  | -0.431874 | -0.87579 | -0.437502 | -0.372118 | -0.615043 |
| A_14_P127466 | 9        | 5427501 | 5427549 | 24212       | C9orf46                  | -0.419788 | -0.99246 | -0.653452 | -0.915113 | -0.860334 |
| A_14_P120124 | 9        | 5453902 | 5453961 | 29104       | PDCC1LG1                 | -1.307655 | -1.2961  | -0.32797  | -0.277665 | -1.160303 |
| A_14_P111176 | 9        | 5500695 | 5500754 | 31003       | PDCC1LG2                 | -0.484208 | -0.43992 | -0.48066  | -0.329996 | -0.403114 |
| A_14_P102548 | 9        | 5536660 | 5536719 | 33160       | PDCC1LG2                 | -0.073034 | -0.7449  | -0.37415  | -0.500981 | -0.328128 |
| A_14_P101695 | 9        | 5760926 | 5760985 | 2338        | KIAA1432                 | 0.300849  | -0.72607 | -0.427572 | -0.821037 | -0.721572 |
| A_14_P103344 | 9        | 5887594 | 5887646 | 35880       | MLANA                    | 0.28311   | -0.69732 | -0.699466 | -0.726703 | -0.599741 |
| A_14_P119048 | 9        | 5890207 | 5890266 | 26783       | MLANA                    | 0.68444   | -0.43505 | -0.56506  | -0.870311 | -0.782018 |
| A_14_P124382 | 9        | 5898765 | 5898824 | 31022       | MLANA                    | 0.167287  | -0.6881  | -0.672362 | -0.642549 | -0.511911 |
| A_14_P122666 | 9        | 5957327 | 5957386 | 38702       | THC2084564               | 0.688843  | -0.45222 | -0.545263 | -0.400546 | -0.508212 |
| A_14_P122767 | 9        | 6089101 | 6089160 | 9417        | chr9:006089101-006089160 | 0.590192  | -0.17926 | -0.517464 | -0.28143  | 0.037315  |
| A_14_P119264 | 9        | 6205819 | 6205878 | 40159       | C9orf26                  | 0.589818  | -0.34569 | -0.393287 | -0.397631 | -0.695555 |
| A_14_P108559 | 9        | 6234664 | 6234723 | 7912        | C9orf26                  | 0.267787  | -0.66491 | -0.724103 | -0.647567 | -0.374253 |
| A_14_P118373 | 9        | 6262516 | 6262575 | 16858       | chr9:006262516-006262575 | 0.577196  | -0.41637 | -0.144214 | -0.240738 | -0.143279 |

|              |   |          |          |       |                          |           |          |           |           |           |
|--------------|---|----------|----------|-------|--------------------------|-----------|----------|-----------|-----------|-----------|
| A_14_P102889 | 9 | 6318511  | 6318564  | 2925  | NYD-SP25                 | 0.229023  | -0.74644 | -0.476091 | -0.465663 | -0.281866 |
| A_14_P130340 | 9 | 6320667  | 6320726  | 26980 | NYD-SP25                 | 0.446259  | -0.84665 | -0.890976 | -0.759531 | -1.032491 |
| A_14_P129759 | 9 | 6321081  | 6321140  | 700   | NYD-SP25                 | 0.106336  | -1.04623 | -0.875495 | -0.777034 | -1.066075 |
| A_14_P124207 | 9 | 6405111  | 6405170  | 12893 | UHRF2                    | 0.447602  | -0.44638 | -0.19781  | -0.336227 | -0.026666 |
| A_14_P124483 | 9 | 6458389  | 6458448  | 18145 | UHRF2                    | 0.30408   | -0.71333 | -0.309173 | -0.119517 | -0.223822 |
| A_14_P104884 | 9 | 6516152  | 6516211  | 29097 | chr9:006516152-006516211 | 0.965779  | -0.46066 | -0.24435  | -0.366572 | -0.478762 |
| A_14_P119183 | 9 | 6582113  | 6582172  | 4736  | GLDC                     | 0.771803  | -0.23991 | -0.03777  | -0.184713 | -0.168211 |
| A_14_P134429 | 9 | 6610160  | 6610214  | 8529  | GLDC                     | 0.815582  | -0.34312 | -0.01753  | -0.268255 | -0.385977 |
| A_14_P111588 | 9 | 6684944  | 6685003  | 14501 | chr9:006684944-006685003 | 0.666603  | -0.3605  | -0.68357  | 0.109642  | -0.499807 |
| A_14_P126908 | 9 | 6804678  | 6804737  | 10577 | JMJD2C                   | 1.139135  | -0.15574 | -0.128683 | -0.184419 | -0.235069 |
| A_14_P122422 | 9 | 6848179  | 6848238  | 21173 | JMJD2C                   | 0.39433   | -1.07519 | -0.70542  | -0.736068 | -1.004781 |
| A_14_P119617 | 9 | 6883176  | 6883235  | 27920 | JMJD2C                   | 0.281324  | -0.61156 | -0.615227 | -0.549227 | -0.653616 |
| A_14_P123456 | 9 | 6923756  | 6923815  | 5315  | JMJD2C                   | 0.609405  | -0.4019  | -0.332734 | -0.684914 | -0.537116 |
| A_14_P135386 | 9 | 6967940  | 6967999  | 27091 | JMJD2C                   | 0.387858  | -0.39355 | -0.335852 | -0.432406 | -0.383263 |
| A_14_P114621 | 9 | 7019186  | 7019245  | 27361 | JMJD2C                   | 0.303832  | -0.15344 | -0.29718  | -0.519657 | -0.069311 |
| A_14_P117140 | 9 | 7058096  | 7058155  | 42560 | JMJD2C                   | 0.92145   | -0.12229 | -0.171482 | -0.41376  | -0.123062 |
| A_14_P101010 | 9 | 7096343  | 7096402  | 40097 | JMJD2C                   | 0.658597  | -0.85746 | -0.541338 | -0.743271 | -0.872897 |
| A_14_P123515 | 9 | 7160033  | 7160092  | 12239 | JMJD2C                   | 0.575789  | -0.51589 | -0.53956  | -0.636705 | -0.374206 |
| A_14_P109465 | 9 | 7192876  | 7192935  | 19167 | chr9:007192876-007192935 | 0.946597  | -0.02877 | -0.212777 | -0.507747 | -0.134349 |
| A_14_P105421 | 9 | 7356869  | 7356928  | 1527  | chr9:007356869-007356928 | 0.755857  | -0.4067  | -0.719695 | -0.495897 | -0.348652 |
| A_14_P139891 | 9 | 7447792  | 7447851  | 32923 | chr9:007447792-007447851 | 0.34366   | -1.24577 | -0.986082 | -1.240833 | -1.014832 |
| A_14_P110790 | 9 | 7649807  | 7649866  | 24517 | chr9:007649807-007649866 | 0.196096  | -0.5922  | -0.150367 | -0.238412 | 0.092419  |
| A_14_P113536 | 9 | 7769255  | 7769314  | 33745 | chr9:007769255-007769314 | 0.610952  | -0.22211 | -0.063815 | -0.410017 | -0.093233 |
| A_14_P119597 | 9 | 7952282  | 7952341  | 39472 | chr9:007952282-007952341 | 0.270502  | -0.93988 | -0.825606 | -0.965875 | -0.881364 |
| A_14_P138604 | 9 | 8106434  | 8106493  | 37154 | chr9:008106434-008106493 | 0.268223  | -0.35345 | -0.68683  | -0.979455 | -0.20287  |
| A_14_P103249 | 9 | 8256433  | 8256492  | 31770 | chr9:008256433-008256492 | 0.606276  | -0.59969 | -0.492227 | -0.461045 | -0.2324   |
| A_14_P133738 | 9 | 8307372  | 8307431  | 34572 | PTPRD                    | -0.031089 | -0.24055 | -0.342605 | -0.258928 | -0.173556 |
| A_14_P131834 | 9 | 8508294  | 8508353  | 31643 | PTPRD                    | 0.186459  | -0.95289 | -1.056539 | -0.756809 | -0.676569 |
| A_14_P134087 | 9 | 8626698  | 8626757  | 9765  | PTPRD                    | 0.123825  | -0.78369 | -0.756837 | -1.049394 | -0.602005 |
| A_14_P124062 | 9 | 8832502  | 8832561  | 7391  | PTPRD                    | 0.251914  | -0.61345 | -0.394911 | -0.542261 | -0.261363 |
| A_14_P138484 | 9 | 9215465  | 9215524  | 23020 | PTPRD                    | 0.153248  | -0.66201 | -0.757349 | -0.65646  | -0.293404 |
| A_14_P107785 | 9 | 9335062  | 9335121  | 22558 | PTPRD                    | 0.749719  | -0.79683 | -0.893704 | -0.853777 | -0.493997 |
| A_14_P130978 | 9 | 9443833  | 9443892  | 23381 | PTPRD                    | 1.019407  | -1.13736 | -0.640597 | -0.705546 | -1.27271  |
| A_14_P101993 | 9 | 9612217  | 9612276  | 32428 | PTPRD                    | 0.836217  | -1.13878 | -0.929972 | -1.089274 | -0.948539 |
| A_14_P123159 | 9 | 9793920  | 9793979  | 27969 | PTPRD                    | 0.496606  | -1.43897 | -1.567212 | -1.334047 | -1.091015 |
| A_14_P113716 | 9 | 10310424 | 10310483 | 28035 | PTPRD                    | 0.132029  | -0.96799 | -0.992873 | -1.362245 | -0.680008 |
| A_14_P118980 | 9 | 10430655 | 10430714 | 35317 | PTPRD                    | 0.117617  | -1.34158 | -1.37585  | -1.583907 | -0.99529  |
| A_14_P126142 | 9 | 10571443 | 10571502 | 28234 | PTPRD                    | 0.855393  | -1.20556 | -0.495208 | -1.004211 | -0.301383 |
| A_14_P112889 | 9 | 10676662 | 10676721 | 28505 | chr9:010676662-010676721 | 0.697105  | -0.82839 | -0.620272 | -0.896489 | -0.137645 |
| A_14_P101597 | 9 | 10872873 | 10872932 | 28928 | chr9:010872873-010872932 | 0.015301  | -1.59621 | -1.520618 | -1.862177 | -1.439326 |
| A_14_P137320 | 9 | 11027385 | 11027444 | 33092 | chr9:011027385-011027444 | 0.731309  | -0.42638 | -0.248104 | -0.498481 | -0.120628 |
| A_14_P103148 | 9 | 11209549 | 11209608 | 25681 | chr9:011209549-011209608 | 0.812767  | -0.73178 | -1.033834 | -1.050417 | -0.307665 |
| A_14_P105529 | 9 | 11447340 | 11447399 | 38054 | chr9:011447340-011447399 | 0.580324  | -0.83283 | -1.083636 | -1.20235  | -0.647468 |
| A_14_P122576 | 9 | 11563531 | 11563590 | 3096  | chr9:011563531-011563590 | 0.769945  | -0.7113  | -0.564369 | -0.931568 | -0.631444 |
| A_14_P135865 | 9 | 11687635 | 11687694 | 28571 | chr9:011687635-011687694 | 0.5482    | -1.21368 | -0.366733 | -0.647642 | -0.270309 |
| A_14_P118017 | 9 | 11808291 | 11808350 | 19394 | chr9:011808291-011808350 | -0.051558 | -1.14857 | -1.49696  | -0.903715 | -0.690266 |
| A_14_P136630 | 9 | 12038553 | 12038612 | 42383 | chr9:012038553-012038612 | 0.680895  | -0.66831 | -0.672443 | -0.732292 | -0.111007 |
| A_14_P131277 | 9 | 12265118 | 12265177 | 8213  | chr9:012265118-012265177 | 0.587453  | -1.01901 | -0.990905 | -0.931865 | -0.478554 |
| A_14_P101834 | 9 | 12395964 | 12396020 | 2674  | chr9:012395964-012396020 | 0.277613  | -0.98485 | -0.853168 | -0.864794 | -1.119337 |
| A_14_P101283 | 9 | 12527982 | 12528041 | 36110 | chr9:012527982-012528041 | 0.804717  | -0.6164  | -0.532694 | -0.794972 | -0.459139 |
| A_14_P110126 | 9 | 12683407 | 12683466 | 5857  | THC2025786               | 0.678802  | -0.65574 | -0.844989 | -0.719507 | -0.361012 |
| A_14_P101680 | 9 | 12688542 | 12688598 | 42640 | TYRP1                    | 0.548885  | -1.0836  | -0.82022  | -0.803651 | -0.194992 |
| A_14_P110857 | 9 | 12762471 | 12762530 | 37470 | chr9:012762471-012762530 | 0.185986  | -1.13384 | -0.759838 | -0.549083 | -0.404651 |
| A_14_P126048 | 9 | 12897767 | 12897826 | 22228 | chr9:012897767-012897826 | 0.285944  | -0.42944 | -0.523873 | -0.438784 | -0.189788 |
| A_14_P121826 | 9 | 12993652 | 12993711 | 14085 | chr9:012993652-012993711 | 0.627723  | -1.02396 | -0.490312 | -0.322787 | -0.423766 |
| A_14_P102069 | 9 | 13096806 | 13096865 | 10871 | MPDZ                     | 0.850179  | -1.03222 | -0.808428 | -0.699577 | -0.847384 |
| A_14_P124786 | 9 | 13105036 | 13105093 | 11768 | MPDZ                     | 0.647194  | -0.86806 | -0.646562 | -0.698225 | -0.705724 |
| A_14_P121943 | 9 | 13126136 | 13126195 | 6493  | MPDZ                     | 0.474627  | -1.05633 | -1.122428 | -0.970614 | -0.911616 |
| A_14_P126447 | 9 | 13173475 | 13173534 | 30660 | MPDZ                     | 0.633994  | -0.92618 | -0.98923  | -1.089228 | -0.803825 |
| A_14_P108991 | 9 | 13207213 | 13207272 | 38038 | MPDZ                     | 0.077201  | -1.1266  | -1.042335 | -0.887744 | -0.853221 |
| A_14_P120596 | 9 | 13240280 | 13240339 | 24746 | MPDZ                     | 0.523132  | -1.03154 | -0.874359 | -0.595623 | -0.96379  |
| A_14_P122672 | 9 | 13364245 | 13364304 | 7172  | chr9:013364245-013364304 | 0.94127   | -0.64281 | -0.756311 | -0.461129 | -0.573224 |
| A_14_P139386 | 9 | 13491678 | 13491737 | 27618 | chr9:013491678-013491737 | 1.070278  | -0.43969 | -0.36008  | -0.550986 | -0.42005  |
| A_14_P120872 | 9 | 13585855 | 13585914 | 15672 | chr9:013585855-013585914 | 0.604454  | -0.58845 | -0.668746 | -0.016142 | 0.235079  |
| A_14_P123311 | 9 | 13742900 | 13742959 | 39405 | chr9:013742900-013742959 | 0.894163  | -0.70807 | -0.346708 | -0.166057 | -0.261381 |
| A_14_P135954 | 9 | 13867280 | 13867339 | 36344 | chr9:013867280-013867339 | 0.556013  | -0.21178 | -0.075066 | -0.068794 | -0.128413 |
| A_14_P126505 | 9 | 14015606 | 14015665 | 25160 | chr9:014015606-014015665 | 1.324269  | -0.65067 | -0.384245 | -0.098274 | -0.282966 |
| A_14_P123749 | 9 | 14077982 | 14078041 | 3228  | NFIB                     | 0.489613  | -0.66715 | -0.621839 | -0.613809 | -0.360967 |
| A_14_P120779 | 9 | 14136754 | 14136813 | 13956 | NFIB                     | 0.570897  | -0.79322 | -0.953575 | -1.068849 | -0.745988 |
| A_14_P128032 | 9 | 14169741 | 14169792 | 34601 | NFIB                     | 0.55963   | -0.64888 | -0.655392 | -0.601372 | -0.601473 |
| A_14_P118937 | 9 | 14260425 | 14260484 | 19085 | NFIB                     | 0.854693  | -0.39973 | -0.093592 | -0.281079 | 0.079716  |
| A_14_P131058 | 9 | 14297028 | 14297079 | 1511  | NFIB                     | 0.899223  | -0.40856 | -0.287278 | -0.515128 | -0.445153 |
| A_14_P127735 | 9 | 14387186 | 14387245 | 37490 | NFIB                     | 0.744719  | -0.38623 | -0.733798 | -0.573976 | -0.508516 |

|              |   |          |          |       |                          |           |          |           |           |           |
|--------------|---|----------|----------|-------|--------------------------|-----------|----------|-----------|-----------|-----------|
| A_14_P112423 | 9 | 14496695 | 14496754 | 40550 | THC2126635               | 1.082478  | -0.18356 | -0.122612 | -0.532771 | -0.073544 |
| A_14_P111726 | 9 | 14600351 | 14600410 | 15353 | chr9:014600351-014600410 | 0.328082  | -0.94272 | -0.730602 | -0.891607 | -0.763024 |
| A_14_P125182 | 9 | 14629912 | 14629971 | 10544 | ZDHHC21                  | 0.142384  | -1.56266 | -1.009094 | -1.093977 | -0.937748 |
| A_14_P132360 | 9 | 14670121 | 14670180 | 38524 | ZDHHC21                  | 0.815103  | -1.05301 | -0.542988 | -0.563221 | -0.979345 |
| A_14_P128784 | 9 | 14710333 | 14710392 | 4140  | CER1                     | 0.713488  | -0.97127 | -0.500427 | -0.732008 | -0.263309 |
| A_14_P104174 | 9 | 14740215 | 14740274 | 5659  | FREM1                    | 0.909441  | -0.38455 | -0.132151 | -0.18062  | 0.294305  |
| A_14_P118605 | 9 | 14877042 | 14877101 | 19417 | FREM1                    | 0.707849  | -0.86169 | -0.609311 | -0.619285 | -0.472361 |
| A_14_P126687 | 9 | 15094399 | 15094458 | 40808 | AK127963                 | 0.954757  | -0.26743 | -0.187605 | -0.4092   | -0.173511 |
| A_14_P130440 | 9 | 15175692 | 15175751 | 15352 | C9orf52                  | 0.916645  | -0.38083 | -0.611791 | -0.270456 | -0.10536  |
| A_14_P111870 | 9 | 15215981 | 15216038 | 32061 | C9orf52                  | 0.705623  | -1.22064 | -0.987512 | -0.608294 | -0.996273 |
| A_14_P135249 | 9 | 15257912 | 15257965 | 1961  | C9orf52                  | 1.046401  | -0.73952 | -0.591411 | -0.831563 | -0.950162 |
| A_14_P111040 | 9 | 15295842 | 15295901 | 41263 | C9orf52                  | 0.948337  | -0.53802 | -0.363246 | -0.248467 | -0.295822 |
| A_14_P110174 | 9 | 15434582 | 15434638 | 2667  | SNAPC3                   | 0.826978  | -0.87198 | -0.485874 | -0.651304 | -0.545431 |
| A_14_P128808 | 9 | 15468451 | 15468510 | 19846 | PSIP1                    | 0.09227   | -1.52359 | -1.199424 | -1.25746  | -1.190838 |
| A_14_P105718 | 9 | 15496545 | 15496601 | 36343 | PSIP1                    | 1.237604  | -0.34499 | -0.703686 | -0.469641 | -0.531337 |
| A_14_P118169 | 9 | 15581401 | 15581460 | 16685 | C9orf93                  | 0.470006  | -1.00863 | -0.849976 | -0.959203 | -0.778359 |
| A_14_P115692 | 9 | 15735493 | 15735552 | 12097 | C9orf93                  | 0.559421  | -1.04741 | -0.90857  | -1.149708 | -0.884093 |
| A_14_P137240 | 9 | 15769098 | 15769157 | 7325  | C9orf93                  | 0.364037  | -0.64819 | -0.324093 | -0.328074 | -0.392496 |
| A_14_P112723 | 9 | 15835641 | 15835700 | 26154 | C9orf93                  | -0.78013  | -0.72097 | -0.525477 | -0.194231 | 0.27127   |
| A_14_P115272 | 9 | 15865748 | 15865807 | 5832  | C9orf93                  | 0.534722  | -0.47299 | -0.872794 | -1.052675 | -0.54115  |
| A_14_P121116 | 9 | 15910301 | 15910360 | 41712 | C9orf93                  | 0.849601  | -0.30346 | -0.353572 | -0.513703 | 0.166413  |
| A_14_P107760 | 9 | 16005445 | 16005504 | 15525 | AL832443                 | 0.774758  | -0.54269 | -0.544051 | -1.077682 | -0.302858 |
| A_14_P124281 | 9 | 16297883 | 16297942 | 4320  | chr9:016297883-016297942 | 1.370949  | -0.06625 | -0.337968 | -0.386644 | -0.586885 |
| A_14_P137212 | 9 | 16408754 | 16408813 | 24144 | BNC2                     | 0.982398  | -0.04407 | -0.22241  | 0.086662  | -0.13796  |
| A_14_P123856 | 9 | 16424825 | 16424884 | 11895 | BNC2                     | 0.777321  | -0.55237 | -0.802761 | -0.705427 | -0.580466 |
| A_14_P116156 | 9 | 16516550 | 16516609 | 40126 | BNC2                     | 0.835918  | -0.60318 | -0.352138 | -0.943051 | -0.106667 |
| A_14_P121758 | 9 | 16650469 | 16650528 | 37641 | BNC2                     | 0.513607  | -0.90955 | -0.66575  | -1.085785 | -0.701641 |
| A_14_P129982 | 9 | 16824893 | 16824952 | 31114 | CR933649                 | 0.278737  | -0.90009 | -0.248669 | -0.664981 | -0.283868 |
| A_14_P113415 | 9 | 17010094 | 17010153 | 28087 | chr9:017010094-017010153 | 0.596722  | -0.58106 | -0.82713  | -0.755117 | -0.637899 |
| A_14_P111589 | 9 | 17133289 | 17133345 | 8049  | C9orf39                  | 0.693208  | -1.23496 | -0.798234 | -0.998119 | -0.894811 |
| A_14_P139298 | 9 | 17185765 | 17185824 | 17745 | C9orf39                  | 0.509884  | -1.65704 | -1.144934 | -1.273537 | -1.055185 |
| A_14_P134003 | 9 | 17225697 | 17225756 | 2377  | C9orf39                  | 0.575797  | -1.05251 | -0.905072 | -0.748319 | -0.091797 |
| A_14_P111571 | 9 | 17288850 | 17288909 | 41399 | C9orf39                  | 0.458348  | -1.14941 | -1.357786 | -1.17103  | -0.978129 |
| A_14_P115836 | 9 | 17332315 | 17332374 | 42019 | C9orf39                  | 0.475841  | -1.16256 | -1.003612 | -0.953873 | -0.962628 |
| A_14_P135776 | 9 | 17456848 | 17456907 | 18602 | C9orf39                  | 0.589321  | -1.17083 | -1.420917 | -0.890693 | -1.04815  |
| A_14_P102486 | 9 | 17492885 | 17492944 | 29890 | C9orf39                  | 1.042781  | -0.6656  | -0.513875 | -0.468847 | -0.202123 |
| A_14_P123391 | 9 | 17568661 | 17568717 | 2216  | chr9:017568661-017568717 | 0.794289  | -0.93019 | 2.08139   | -0.437329 | -0.612948 |
| A_14_P107438 | 9 | 17620872 | 17620931 | 2225  | SH3GL2                   | 0.488719  | -0.73708 | -0.045424 | -0.699409 | -0.263824 |
| A_14_P100445 | 9 | 17699065 | 17699124 | 3617  | SH3GL2                   | 0.709575  | -0.44525 | -0.896464 | -1.1298   | -0.519596 |
| A_14_P112252 | 9 | 17751453 | 17751511 | 8599  | SH3GL2                   | 0.805727  | -0.21993 | -0.638994 | -0.707546 | -0.18585  |
| A_14_P101372 | 9 | 17786669 | 17786728 | 25538 | SH3GL2                   | 0.922403  | -0.42513 | -0.829745 | -0.827146 | -0.547392 |
| A_14_P123124 | 9 | 17841059 | 17841118 | 36978 | chr9:017841059-017841118 | 1.122161  | -0.39966 | -0.088792 | -0.570049 | -0.099392 |
| A_14_P117097 | 9 | 17975541 | 17975600 | 4862  | chr9:017975541-017975600 | 0.787811  | -0.62387 | -0.77743  | -1.411519 | -0.368926 |
| A_14_P116503 | 9 | 18176747 | 18176806 | 36200 | chr9:018176747-018176806 | 0.87154   | -0.82004 | -0.505143 | -0.792998 | -0.37998  |
| A_14_P129588 | 9 | 18278809 | 18278868 | 7581  | chr9:018278809-018278868 | 0.384028  | -0.43318 | -0.708495 | -0.409649 | -0.482325 |
| A_14_P135045 | 9 | 18388255 | 18388314 | 24751 | AI628643                 | 0.615636  | -0.56515 | -0.816102 | -0.70325  | -0.924141 |
| A_14_P121984 | 9 | 18464451 | 18464510 | 30517 | ADAMTSL1                 | 0.896349  | -0.66156 | -0.636265 | -0.600654 | -0.621678 |
| A_14_P124537 | 9 | 18523248 | 18523307 | 15805 | ADAMTSL1                 | 1.012589  | -0.15573 | -0.298861 | -0.456172 | -0.250217 |
| A_14_P116569 | 9 | 18564217 | 18564273 | 39095 | ADAMTSL1                 | 0.829663  | -0.63705 | -0.377995 | -0.809915 | -0.631031 |
| A_14_P121190 | 9 | 18629234 | 18629284 | 18140 | ADAMTSL1                 | 0.735606  | -0.82071 | -0.561785 | -0.589125 | -0.210633 |
| A_14_P132270 | 9 | 18671030 | 18671089 | 18069 | ADAMTSL1                 | 1.073255  | -0.60653 | -0.846444 | -0.608003 | -0.541159 |
| A_14_P124587 | 9 | 18733237 | 18733296 | 17086 | chr9:018733237-018733296 | 0.95146   | -0.33543 | -0.277397 | -0.161929 | -0.024659 |
| A_14_P118808 | 9 | 18828925 | 18828984 | 18481 | C9orf94                  | 0.816132  | -0.88239 | -0.56434  | -0.715997 | -0.393741 |
| A_14_P129080 | 9 | 18882921 | 18882980 | 17603 | C9orf94                  | 1.182585  | -0.54943 | -0.07926  | -0.331433 | -0.03751  |
| A_14_P100522 | 9 | 18940859 | 18940918 | 38040 | C9orf138                 | 1.011258  | -0.31053 | 0.0481    | -0.244325 | -0.034033 |
| A_14_P130412 | 9 | 18983768 | 18983827 | 2680  | C9orf138                 | 0.888936  | -0.75356 | -0.548116 | -0.463304 | -0.423759 |
| A_14_P106917 | 9 | 19012646 | 19012705 | 21556 | C9orf138                 | 0.67277   | -0.8008  | -0.767641 | -0.555903 | -0.850623 |
| A_14_P102520 | 9 | 19040855 | 19040914 | 37082 | RRAGA                    | 1.251911  | -0.71553 | -0.21913  | -0.544793 | -0.491734 |
| A_14_P110216 | 9 | 19047618 | 19047677 | 31023 | FAM29A                   | 0.861557  | -0.68627 | -0.494621 | -0.470714 | -0.578681 |
| A_14_P100674 | 9 | 19047891 | 19047950 | 27661 | FAM29A                   | 1.069943  | -0.58768 | -0.086258 | -0.482063 | -0.201654 |
| A_14_P106258 | 9 | 19086648 | 19086707 | 9826  | FAM29A                   | 0.718048  | -0.08281 | -0.128713 | -0.319507 | 0.131515  |
| A_14_P106258 | 9 | 19086648 | 19086707 | 24478 | FAM29A                   | 0.710636  | -0.09349 | -0.093304 | -0.224391 | 0.126479  |
| A_14_P106258 | 9 | 19086648 | 19086707 | 6643  | FAM29A                   | 0.703746  | -0.07434 | -0.108974 | -0.326434 | 0.098701  |
| A_14_P118582 | 9 | 19110377 | 19110436 | 38055 | ADFP                     | 1.146328  | -0.4187  | 0.455518  | -0.068908 | -0.06326  |
| A_14_P105692 | 9 | 19203822 | 19203881 | 15612 | AF274945                 | 1.418121  | -0.26496 | 0.090259  | -0.102156 | 0.021846  |
| A_14_P103673 | 9 | 19286099 | 19286158 | 13890 | C9orf55                  | 0.419294  | -0.46324 | -0.296944 | -0.749802 | -0.578735 |
| A_14_P108728 | 9 | 19314347 | 19314406 | 33445 | C9orf55                  | 0.708865  | -0.77256 | -0.082964 | -0.635857 | -0.495801 |
| A_14_P101924 | 9 | 19347623 | 19347682 | 39917 | C9orf55                  | 0.964227  | -0.5073  | -0.044581 | -0.270679 | -0.195832 |
| A_14_P135698 | 9 | 19368480 | 19368539 | 17010 | RPS6                     | -0.084504 | 0.097854 | 0.096681  | -0.042998 | 0.087485  |
| A_14_P105218 | 9 | 19501524 | 19501583 | 17746 | AK127092                 | 0.736104  | -0.84172 | -1.077557 | -0.982537 | -0.873489 |
| A_14_P110734 | 9 | 19540125 | 19540179 | 43140 | SLC24A2                  | 1.131763  | -0.11356 | -0.323589 | -0.427808 | -0.232434 |
| A_14_P115404 | 9 | 19587233 | 19587292 | 33145 | SLC24A2                  | 0.932402  | -0.10464 | -0.388495 | -0.262182 | 0.009979  |
| A_14_P100009 | 9 | 19636699 | 19636758 | 35267 | SLC24A2                  | 0.946306  | -0.06344 | -0.600048 | -0.778083 | -0.504947 |

|              |   |          |          |       |                          |           |          |           |           |           |
|--------------|---|----------|----------|-------|--------------------------|-----------|----------|-----------|-----------|-----------|
| A_14_P116599 | 9 | 19716199 | 19716258 | 17375 | SLC24A2                  | 0.224453  | -1.14846 | -0.611343 | -1.056603 | -0.894756 |
| A_14_P137232 | 9 | 19775974 | 19776033 | 26597 | SLC24A2                  | 1.013655  | -0.99689 | -0.852455 | -0.871488 | -0.568136 |
| A_14_P109715 | 9 | 19804638 | 19804697 | 33701 | chr9:019804638-019804697 | 0.636395  | -1.40539 | -1.111176 | -1.050573 | -1.168604 |
| A_14_P115522 | 9 | 19908661 | 19908720 | 38090 | chr9:019908661-019908720 | 0.753511  | -0.32599 | -0.435154 | -0.461942 | -0.279321 |
| A_14_P119246 | 9 | 20111574 | 20111633 | 20502 | chr9:020111574-020111633 | -0.139321 | -0.39852 | -0.477628 | -0.811111 | -0.331425 |
| A_14_P131247 | 9 | 20208937 | 20208996 | 7211  | chr9:020208937-020208996 | -0.118415 | -0.47827 | -0.619618 | -0.536454 | -0.222421 |
| A_14_P127715 | 9 | 20300511 | 20300570 | 8695  | chr9:020300511-020300570 | -0.0369   | -0.43109 | -0.47244  | -0.630638 | -0.383912 |
| A_14_P116482 | 9 | 20336094 | 20336153 | 14267 | MLLT3                    | -0.145982 | -0.74777 | -0.765617 | -0.59677  | -0.576381 |
| A_14_P126758 | 9 | 20446703 | 20446762 | 29484 | MLLT3                    | 0.389145  | -0.975   | -0.821354 | -0.778023 | -0.809748 |
| A_14_P111169 | 9 | 20510469 | 20510528 | 22032 | MLLT3                    | -0.169814 | -0.79028 | -0.5071   | -0.283275 | -0.401707 |
| A_14_P108723 | 9 | 20607752 | 20607811 | 37347 | MLLT3                    | -0.179286 | -0.77049 | -0.620852 | -0.76304  | -0.583597 |
| A_14_P125380 | 9 | 20640349 | 20640408 | 32454 | chr9:020640349-020640408 | -0.319092 | -0.77151 | -0.561685 | -0.615013 | -0.766465 |
| A_14_P113345 | 9 | 20684462 | 20684521 | 27447 | chr9:020684462-020684521 | -0.405248 | -0.9295  | -0.889573 | -0.959222 | -0.714672 |
| A_14_P116892 | 9 | 20768714 | 20768773 | 39576 | KIAA1797                 | 0.563394  | -0.25544 | -0.358135 | -0.480713 | -0.149473 |
| A_14_P113538 | 9 | 20810273 | 20810332 | 43119 | KIAA1797                 | -0.062516 | -0.50019 | -0.53638  | -0.487864 | -0.073933 |
| A_14_P115355 | 9 | 20864659 | 20864718 | 29178 | KIAA1797                 | -0.461649 | -0.70788 | -1.01502  | -1.119504 | -0.828705 |
| A_14_P132615 | 9 | 20943032 | 20943091 | 36694 | KIAA1797                 | -0.079706 | -0.55289 | -0.667244 | -0.594431 | -0.037898 |
| A_14_P106161 | 9 | 20992866 | 20992925 | 21395 | chr9:020992866-020992925 | -0.32315  | -0.89479 | -0.859501 | -0.676882 | -0.608013 |
| A_14_P124911 | 9 | 21067574 | 21067633 | 30607 | IFNB1                    | -0.130618 | -0.93951 | -0.538355 | -0.398962 | -0.329538 |
| A_14_P102024 | 9 | 21095075 | 21095134 | 12358 | chr9:021095075-021095134 | 0.099812  | -0.96867 | -1.014537 | -0.323969 | -0.199028 |
| A_14_P129669 | 9 | 21130864 | 21130923 | 36432 | IFNW1                    | -0.310134 | -0.93047 | -0.90205  | -1.111222 | -0.889458 |
| A_14_P131521 | 9 | 21131868 | 21131927 | 17302 | IFNW1                    | -0.038413 | -0.42713 | -0.368697 | -0.753813 | -0.050766 |
| A_14_P136897 | 9 | 21154498 | 21154557 | 18754 | chr9:021154498-021154557 | -0.386564 | -0.97676 | -0.899608 | -1.066    | -0.819531 |
| A_14_P105962 | 9 | 21168022 | 21168081 | 26296 | chr9:021168022-021168081 | -0.019859 | -0.59342 | -0.552326 | -0.85682  | -0.533519 |
| A_14_P104628 | 9 | 21231471 | 21231530 | 2519  | chr9:021231471-021231530 | -0.083961 | -0.71383 | -0.84668  | -1.295823 | -0.338632 |
| A_14_P116804 | 9 | 21294530 | 21294589 | 38845 | IFNA5                    | 0.05924   | -0.60433 | -0.34418  | -0.442505 | 0.026899  |
| A_14_P139584 | 9 | 21321182 | 21321241 | 39473 | KLHL9                    | -0.083851 | -0.61203 | -0.889922 | -0.195921 | -0.406595 |
| A_14_P105274 | 9 | 21337678 | 21337737 | 31533 | chr9:021337678-021337737 | -0.533373 | -1.29423 | -1.040281 | -1.163302 | -1.034716 |
| A_14_P127147 | 9 | 21362177 | 21362236 | 3814  | chr9:021362177-021362236 | -0.075363 | -1.08206 | -0.711478 | -1.040989 | -0.381401 |
| A_14_P104948 | 9 | 21374383 | 21374442 | 39835 | IFNA2                    | 0.121441  | -0.8603  | -0.49505  | -0.56436  | -0.211333 |
| A_14_P109107 | 9 | 21399800 | 21399850 | 15964 | IFNA8                    | 0.44716   | -0.7202  | -0.418006 | -0.301165 | -0.068095 |
| A_14_P105901 | 9 | 21431614 | 21431673 | 1449  | chr9:021431614-021431673 | -0.100543 | -1.07615 | -0.945477 | -0.90475  | -0.869157 |
| A_14_P101271 | 9 | 21471540 | 21471599 | 11305 | IFNE1                    | -0.1787   | -0.41291 | -0.893012 | -0.864169 | -0.738663 |
| A_14_P113652 | 9 | 21537336 | 21537395 | 41052 | AK124391                 | -6.199954 | -1.41443 | -1.230545 | -0.983545 | -1.005763 |
| A_14_P130737 | 9 | 21733410 | 21733469 | 22301 | chr9:021733410-021733469 | -5.003456 | -0.32419 | -0.704085 | -0.747517 | -0.204442 |
| A_14_P105352 | 9 | 21795270 | 21795329 | 10703 | MTAP                     | -4.052906 | -0.64217 | -0.175224 | -0.281656 | -0.249724 |
| A_14_P117235 | 9 | 21845114 | 21845173 | 18900 | MTAP                     | -4.38948  | -0.75266 | -0.761363 | -0.938408 | -0.979586 |
| A_14_P101143 | 9 | 21853204 | 21853263 | 14608 | MTAP                     | -4.454612 | -0.89241 | -0.658762 | -0.785305 | -0.872841 |
| A_14_P121053 | 9 | 21957548 | 21957607 | 38588 | C9orf53                  | -4.772336 | -1.10428 | -0.810284 | -0.740588 | -0.925523 |
| A_14_P129522 | 9 | 21958041 | 21958099 | 20452 | CDKN2A                   | -3.082735 | -0.90977 | -0.567499 | -0.563103 | -0.73971  |
| A_14_P130650 | 9 | 21968346 | 21968405 | 28823 | CDKN2A                   | -4.909179 | -1.30631 | -0.943173 | -1.160611 | -1.299896 |
| A_14_P112983 | 9 | 21980522 | 21980581 | 39890 | CDKN2A                   | -3.886752 | -0.73545 | -0.658425 | -0.679522 | -0.906729 |
| A_14_P102897 | 9 | 21993651 | 21993710 | 16778 | CDKN2B                   | -4.159651 | -0.95772 | -0.723257 | -0.752693 | -0.935094 |
| A_14_P103496 | 9 | 21998167 | 21998226 | 20387 | CDKN2B                   | -5.62442  | -1.09279 | -0.647171 | -0.841608 | -0.962622 |
| A_14_P127768 | 9 | 21998596 | 21998655 | 20500 | CDKN2B                   | -5.098234 | -1.23084 | -0.687134 | -1.097487 | -1.255368 |
| A_14_P118440 | 9 | 21998982 | 21999029 | 35953 | CDKN2B                   | -1.907127 | -0.55086 | 0.529111  | -0.790176 | -2.478843 |
| A_14_P106813 | 9 | 22136626 | 22136685 | 39329 | LOC401495                | -5.006992 | -1.08782 | -0.598273 | -0.712121 | -0.638607 |
| A_14_P113515 | 9 | 22316165 | 22316224 | 6314  | chr9:022316165-022316224 | -4.84499  | -0.87986 | -0.798418 | -0.772284 | -0.637206 |
| A_14_P129139 | 9 | 22690103 | 22690162 | 4142  | AX747623                 | -5.192927 | -0.34585 | -0.704022 | -0.810098 | -0.168709 |
| A_14_P127990 | 9 | 22889584 | 22889643 | 16321 | chr9:022889584-022889643 | -6.577623 | -0.6385  | -0.423866 | -0.463946 | -0.362755 |
| A_14_P116221 | 9 | 22992318 | 22992377 | 17657 | chr9:022992318-022992377 | -3.244513 | -0.03018 | -0.717943 | -0.522539 | -0.102904 |
| A_14_P102923 | 9 | 23425976 | 23426035 | 15451 | chr9:023425976-023426035 | -4.032987 | -0.8341  | -0.317323 | -0.642776 | -0.446244 |
| A_14_P128755 | 9 | 23649971 | 23650030 | 13523 | CR627240                 | -2.325228 | -0.1517  | -0.496284 | -0.512028 | -0.447386 |
| A_14_P113744 | 9 | 23680273 | 23680332 | 27434 | ELAVL2                   | -4.251452 | -0.38851 | -0.65757  | -0.659726 | -0.605376 |
| A_14_P101322 | 9 | 23714814 | 23714873 | 9485  | ELAVL2                   | -3.968281 | -0.40974 | -0.402153 | -0.657709 | -0.916976 |
| A_14_P106458 | 9 | 23779157 | 23779216 | 34983 | ELAVL2                   | -3.117608 | -0.93748 | -0.860581 | -1.058277 | -0.995801 |
| A_14_P116494 | 9 | 23816193 | 23816243 | 9723  | ELAVL2                   | -0.754246 | -0.32212 | -0.146774 | -0.215698 | -0.214357 |
| A_14_P123655 | 9 | 24022718 | 24022777 | 22871 | chr9:024022718-024022777 | -4.555069 | -0.36848 | -0.848194 | -0.871687 | -0.203735 |
| A_14_P124975 | 9 | 24136307 | 24136366 | 23227 | chr9:024136307-024136366 | -4.48416  | -0.97279 | -0.870529 | -1.001607 | -0.329621 |
| A_14_P133944 | 9 | 24538868 | 24538927 | 35819 | BU561092                 | -3.713721 | -0.83321 | -0.33938  | -0.635858 | -0.033014 |
| A_14_P116740 | 9 | 24684752 | 24684811 | 19474 | chr9:024684752-024684811 | -4.591509 | -0.92233 | -0.996193 | -1.148728 | -0.856437 |
| A_14_P107920 | 9 | 24873989 | 24874048 | 24516 | chr9:024873989-024874048 | -4.841781 | -1.39175 | -1.656347 | -1.438604 | -1.05512  |
| A_14_P103463 | 9 | 25081725 | 25081784 | 5513  | chr9:025081725-025081784 | -1.178216 | -0.76754 | -0.83977  | -0.831058 | -0.755006 |
| A_14_P115765 | 9 | 25195505 | 25195564 | 28069 | chr9:025195505-025195564 | -0.855633 | -0.61811 | -1.043545 | -0.944545 | -0.701161 |
| A_14_P125459 | 9 | 25357325 | 25357384 | 10376 | chr9:025357325-025357384 | -4.991399 | -1.28014 | -1.342699 | -1.255175 | -1.224222 |
| A_14_P104894 | 9 | 25573028 | 25573087 | 20088 | chr9:025573028-025573087 | -4.868785 | -1.26931 | -0.963636 | -0.987429 | -1.445665 |
| A_14_P109134 | 9 | 25728780 | 25728839 | 8139  | chr9:025728780-025728839 | -3.940201 | -1.023   | -0.58505  | -0.575875 | -0.836561 |
| A_14_P110074 | 9 | 25899346 | 25899405 | 40351 | chr9:025899346-025899405 | -6.243943 | -0.90526 | -0.824436 | -0.926378 | -0.403213 |
| A_14_P106279 | 9 | 26086341 | 26086400 | 32128 | FLJ16323                 | -5.151663 | -0.46699 | -0.491836 | -0.611618 | 0.026855  |
| A_14_P104406 | 9 | 26311885 | 26311944 | 34782 | chr9:026311885-026311944 | -2.074522 | -1.38515 | -0.927465 | -1.007137 | -0.614284 |
| A_14_P125576 | 9 | 26454989 | 26455048 | 8744  | chr9:026454989-026455048 | -1.854539 | -1.2665  | -1.193818 | -1.111128 | -1.090183 |
| A_14_P111432 | 9 | 26639384 | 26639443 | 22484 | chr9:026639384-026639443 | -1.643308 | -0.89363 | -0.538427 | -0.822208 | -0.385659 |
| A_14_P135744 | 9 | 26790767 | 26790826 | 17529 | chr9:026790767-026790826 | -2.104587 | -1.32014 | -1.490615 | -1.450651 | -1.213222 |

|              |   |          |          |       |                          |           |          |           |           |           |
|--------------|---|----------|----------|-------|--------------------------|-----------|----------|-----------|-----------|-----------|
| A_14_P118580 | 9 | 26831650 | 26831709 | 10720 | C9orf82                  | -1.195094 | -1.09886 | -0.685958 | -0.804143 | -1.141054 |
| A_14_P131102 | 9 | 26867539 | 26867598 | 10005 | C9orf82                  | -1.193729 | -0.93722 | -0.649361 | -0.81108  | -0.713145 |
| A_14_P134594 | 9 | 26904780 | 26904839 | 16894 | PLAA                     | -1.256792 | -0.74115 | -0.370688 | -0.725297 | -0.380744 |
| A_14_P127755 | 9 | 26933569 | 26933628 | 2210  | PLAA                     | -1.390894 | -0.95878 | -0.434063 | -0.776158 | -0.362403 |
| A_14_P120970 | 9 | 26989600 | 26989659 | 25158 | CCDC2                    | -0.905287 | -0.20385 | -0.49715  | -0.555268 | -0.605277 |
| A_14_P120037 | 9 | 27019070 | 27019129 | 25016 | CCDC2                    | -1.321814 | -1.01712 | -0.943013 | -0.876643 | -1.046746 |
| A_14_P132422 | 9 | 27052817 | 27052876 | 10868 | CCDC2                    | -0.963619 | -0.67552 | -0.318109 | -0.603127 | -0.469008 |
| A_14_P117680 | 9 | 27100164 | 27100223 | 16227 | TEK                      | -0.625354 | -0.90665 | -0.323938 | -0.456032 | -0.75481  |
| A_14_P137338 | 9 | 27111885 | 27111944 | 36120 | TEK                      | -1.179768 | -0.94543 | -0.361868 | -0.696578 | -0.778036 |
| A_14_P136657 | 9 | 27148028 | 27148087 | 14176 | TEK                      | -1.111494 | -0.3928  | -0.43119  | -0.676251 | -0.230121 |
| A_14_P116356 | 9 | 27220105 | 27220164 | 37866 | TEK                      | -1.084332 | -0.48509 | -0.624265 | -0.77367  | -0.437751 |
| A_14_P116356 | 9 | 27220105 | 27220164 | 22619 | TEK                      | -1.120181 | -0.43045 | -0.667163 | -0.502042 | -0.454321 |
| A_14_P116356 | 9 | 27220105 | 27220164 | 15342 | TEK                      | -1.317387 | -0.50812 | -0.658368 | -0.925927 | -0.465788 |
| A_14_P121378 | 9 | 27253839 | 27253898 | 8373  | C9orf14                  | -1.529009 | -0.55605 | -0.749331 | -1.090061 | -0.369027 |
| A_14_P125261 | 9 | 27316598 | 27316657 | 25487 | MOBK2B                   | -1.103844 | -0.29521 | -0.298209 | -0.93385  | -0.962774 |
| A_14_P109949 | 9 | 27364468 | 27364527 | 11670 | MOBK2B                   | -0.996486 | -0.23356 | -0.247863 | -0.434631 | -0.354429 |
| A_14_P103371 | 9 | 27445716 | 27445771 | 25546 | MOBK2B                   | -1.242962 | -0.27554 | -0.344457 | -0.742852 | -0.194176 |
| A_14_P129027 | 9 | 27514323 | 27514382 | 26454 | MOBK2B                   | -0.791172 | -0.62545 | -0.310619 | -0.627076 | -1.314162 |
| A_14_P113409 | 9 | 27546647 | 27546704 | 14483 | C9orf72                  | -0.573583 | -0.53232 | -0.493691 | -0.523063 | -0.347979 |
| A_14_P131150 | 9 | 27616876 | 27616935 | 3448  | chr9:027616876-027616935 | -1.457914 | -1.17751 | -0.905548 | -0.883293 | -0.931937 |
| A_14_P134672 | 9 | 27767632 | 27767691 | 6834  | chr9:027767632-027767691 | -1.381376 | -0.59952 | -0.854379 | -0.928534 | -0.500148 |
| A_14_P129354 | 9 | 27906783 | 27906842 | 18526 | chr9:027906783-027906842 | -1.681561 | -0.73691 | -0.758201 | -0.79327  | -0.322848 |
| A_14_P135485 | 9 | 27939969 | 27940028 | 14039 | FLJ31810                 | -1.339767 | -0.80521 | -0.813404 | -0.906181 | -0.170288 |
| A_14_P101686 | 9 | 28203365 | 28203424 | 8764  | FLJ31810                 | -1.499763 | -0.92584 | -0.968621 | -0.716821 | -0.615254 |
| A_14_P113468 | 9 | 28509569 | 28509628 | 13797 | FLJ31810                 | -1.174402 | -0.48532 | -0.425353 | -0.833166 | -0.055775 |
| A_14_P137718 | 9 | 28660476 | 28660535 | 34447 | THC2061367               | -1.660396 | -0.79056 | -0.702572 | -1.137282 | -0.691478 |
| A_14_P120186 | 9 | 28734987 | 28735046 | 13326 | THC2061367               | -1.569008 | -1.27737 | -1.254814 | -1.497119 | -0.83829  |
| A_14_P111082 | 9 | 29012489 | 29012548 | 36878 | THC2061367               | -1.893    | -0.71949 | -0.805334 | -0.96708  | -0.405433 |
| A_14_P106446 | 9 | 29209997 | 29210056 | 41400 | chr9:029209997-029210056 | -0.301057 | -0.74384 | -0.515764 | -0.530582 | -0.599267 |
| A_14_P102285 | 9 | 29447747 | 29447806 | 12052 | chr9:029447747-029447806 | -1.666021 | -0.99307 | -0.171746 | -0.799995 | -0.439321 |
| A_14_P128761 | 9 | 29591835 | 29591894 | 3664  | chr9:029591835-029591894 | -1.49124  | -1.25264 | -0.933135 | -0.771065 | -0.528237 |
| A_14_P107553 | 9 | 29743333 | 29743392 | 15327 | chr9:029743333-029743392 | -0.947712 | -1.24684 | -0.417564 | -0.63206  | 0.04634   |
| A_14_P119736 | 9 | 29908743 | 29908802 | 33669 | chr9:029908743-029908802 | -1.370828 | -0.91295 | -0.732565 | -0.855306 | -0.60802  |
| A_14_P106899 | 9 | 30134402 | 30134461 | 1909  | chr9:030134402-030134461 | -1.665022 | -1.18471 | -1.466333 | -1.451692 | -0.963018 |
| A_14_P125500 | 9 | 30414069 | 30414128 | 34807 | chr9:030414069-030414128 | -1.737744 | -0.77836 | -1.174513 | -1.164302 | -0.534738 |
| A_14_P133121 | 9 | 30542335 | 30542394 | 9261  | chr9:030542335-030542394 | -1.590582 | -1.0218  | -0.830885 | -0.899337 | -0.47221  |
| A_14_P116437 | 9 | 30737580 | 30737639 | 527   | chr9:030737580-030737639 | -1.845232 | -1.20022 | -0.881519 | -0.900935 | -0.731287 |
| A_14_P135246 | 9 | 31013099 | 31013158 | 19485 | chr9:031013099-031013158 | -1.259506 | -0.98532 | -0.944665 | -0.856001 | -0.961222 |
| A_14_P139251 | 9 | 31181538 | 31181597 | 9594  | chr9:031181538-031181597 | -1.666248 | -1.00424 | -0.628046 | -0.902625 | -0.383162 |
| A_14_P114603 | 9 | 31357313 | 31357372 | 39736 | chr9:031357313-031357372 | -1.429185 | -0.90464 | -0.811295 | -0.717688 | -0.30428  |
| A_14_P133601 | 9 | 31463840 | 31463899 | 27117 | chr9:031463840-031463899 | -1.369982 | -0.90913 | -0.623022 | -0.627233 | -0.744365 |
| A_14_P101829 | 9 | 31713924 | 31713983 | 29839 | AK124280                 | -1.103495 | -0.42343 | -0.384197 | -0.650896 | 0.199816  |
| A_14_P136706 | 9 | 31881415 | 31881474 | 10115 | chr9:031881415-031881474 | -1.509551 | -0.60281 | -0.792701 | -0.235702 | -0.006321 |
| A_14_P104494 | 9 | 32020469 | 32020528 | 41627 | chr9:032020469-032020528 | -1.171893 | -0.81662 | -0.493134 | -0.966595 | -0.658534 |
| A_14_P120414 | 9 | 32195770 | 32195829 | 30797 | chr9:032195770-032195829 | -0.108356 | -0.53315 | -0.426627 | -0.721354 | -0.397098 |
| A_14_P102783 | 9 | 32375919 | 32375966 | 43662 | ACO1                     | -0.196748 | -0.47689 | -0.251384 | -0.499104 | -0.556777 |
| A_14_P138680 | 9 | 32415365 | 32415424 | 38869 | ACO1                     | -0.26801  | -0.29991 | -0.051009 | -0.351746 | 0.010398  |
| A_14_P136455 | 9 | 32446057 | 32446116 | 8928  | DDX58                    | -0.398514 | -0.70998 | -0.699108 | -0.667171 | -0.550268 |
| A_14_P129780 | 9 | 32514411 | 32514470 | 22827 | DDX58                    | -0.34131  | -0.78593 | -0.394808 | -0.399123 | -0.188702 |
| A_14_P126475 | 9 | 32538760 | 32538819 | 13222 | TOPORS                   | -0.789772 | -0.95233 | -0.489666 | -0.578866 | -0.280276 |
| A_14_P107037 | 9 | 32541259 | 32541318 | 25023 | TOPORS                   | -0.629996 | -0.93741 | -0.271069 | -0.338185 | -0.157334 |
| A_14_P135984 | 9 | 32548887 | 32548946 | 36595 | NDUFB6                   | -0.781394 | -1.25872 | -0.750043 | -0.682009 | -0.671287 |
| A_14_P108455 | 9 | 32623070 | 32623127 | 40320 | TAF1L                    | -0.242441 | -0.18669 | 0.130563  | -0.422032 | -0.313469 |
| A_14_P139980 | 9 | 32834623 | 32834682 | 1286  | chr9:032834623-032834682 | -0.481246 | -0.69565 | -0.226804 | -0.700202 | -0.375251 |
| A_14_P121977 | 9 | 32978063 | 32978122 | 12719 | APTX                     | -0.221333 | -0.55536 | -0.394979 | -0.350955 | -0.512042 |
| A_14_P102776 | 9 | 33019002 | 33019061 | 40228 | DNAJA1                   | -0.210314 | -0.79661 | -0.048756 | -0.048488 | -0.250961 |
| A_14_P108970 | 9 | 33025827 | 33025886 | 9358  | DNAJA1                   | -0.009203 | -0.61132 | -0.252191 | -0.446168 | -0.561847 |
| A_14_P106115 | 9 | 33027699 | 33027758 | 34493 | DNAJA1                   | 0.310102  | -0.61513 | -0.010453 | -0.147188 | -0.351757 |
| A_14_P137305 | 9 | 33036145 | 33036204 | 10223 | SMU1                     | -0.495015 | -1.24846 | -0.463247 | -0.577762 | -0.83412  |
| A_14_P100153 | 9 | 33066240 | 33066291 | 3648  | SMU1                     | 0.002687  | -0.99931 | -0.705695 | -0.346006 | -0.761888 |
| A_14_P117645 | 9 | 33114815 | 33114874 | 36336 | B4GALT1                  | 0.300271  | -0.59371 | -0.351606 | 0.049563  | -0.372306 |
| A_14_P119243 | 9 | 33155416 | 33155475 | 16142 | B4GALT1                  | -0.085483 | -0.55169 | -0.518207 | -0.131123 | -0.624533 |
| A_14_P139968 | 9 | 33238412 | 33238467 | 19803 | SPINK4                   | 0.4897    | -0.20048 | 0.414472  | 0.81137   | 0.083227  |
| A_14_P136108 | 9 | 33245269 | 33245317 | 43268 | BAG1                     | -0.078878 | -0.68197 | -0.370995 | 0.267674  | -0.537136 |
| A_14_P132950 | 9 | 33257864 | 33257923 | 42479 | SNF7DC2                  | -0.087076 | 0.001221 | -0.087361 | -0.135322 | -0.224283 |
| A_14_P105756 | 9 | 33293233 | 33293292 | 43749 | NFX1                     | -0.237227 | -0.38054 | -0.047439 | 0.008222  | -0.403133 |
| A_14_P126317 | 9 | 33337012 | 33337070 | 3721  | NFX1                     | 0.095377  | -0.35934 | -0.332164 | -0.492873 | -0.728978 |
| A_14_P138615 | 9 | 33394021 | 33394066 | 15063 | AA491841                 | 0.489451  | -0.02201 | -0.014764 | 0.31958   | 0.204606  |
| A_14_P113876 | 9 | 33431267 | 33431326 | 17528 | AQP3                     | 0.69676   | 0.53175  | 0.54877   | 0.573817  | 0.447041  |
| A_14_P125761 | 9 | 33456965 | 33457009 | 39111 | NOL6                     | 0.238514  | -0.0026  | 0.139735  | 0.074749  | -0.019545 |
| A_14_P134218 | 9 | 33745689 | 33745748 | 30777 | PRSS3                    | 0.043089  | -0.81149 | -0.477978 | -0.441444 | -0.475216 |
| A_14_P124089 | 9 | 33778378 | 33778437 | 35017 | PRSS3                    | -0.610086 | -0.49348 | -0.535892 | -0.076755 | -0.701859 |
| A_14_P132380 | 9 | 33809009 | 33809068 | 998   | UBE2R2                   | 0.04892   | -0.72681 | -0.642012 | -0.7349   | -0.651292 |



|              |   |          |          |       |                          |           |          |           |           |           |
|--------------|---|----------|----------|-------|--------------------------|-----------|----------|-----------|-----------|-----------|
| A_14_P116012 | 9 | 33852241 | 33852300 | 8260  | UBE2R2                   | -0.111688 | -0.39057 | -0.18259  | -0.108489 | -0.178264 |
| A_14_P111916 | 9 | 33890470 | 33890529 | 34298 | UBE2R2                   | -0.137069 | -0.42567 | -0.188576 | -0.238136 | -0.474048 |
| A_14_P123714 | 9 | 33931822 | 33931881 | 6352  | UBAP2                    | -0.443945 | -0.41766 | -0.148242 | -0.327966 | -0.448892 |
| A_14_P139249 | 9 | 33961695 | 33961753 | 18021 | UBAP2                    | -0.036284 | -0.24556 | -0.164859 | -0.423963 | -0.390586 |
| A_14_P106489 | 9 | 34007112 | 34007171 | 25093 | UBAP2                    | -0.114319 | -0.21297 | 0.035694  | -0.143122 | -0.086189 |
| A_14_P110483 | 9 | 34075974 | 34076033 | 26664 | chr9:034075974-034076033 | -0.63266  | -0.08263 | 0.144104  | 0.101293  | 0.11623   |
| A_14_P127668 | 9 | 34105673 | 34105732 | 18411 | WDR40A                   | 0.072385  | -0.44704 | 0.036075  | -0.182369 | -0.389552 |
| A_14_P102740 | 9 | 34168719 | 34168773 | 22194 | LOC340499                | 0.184512  | -0.36265 | -0.150084 | -0.331644 | -0.284846 |
| A_14_P100730 | 9 | 34177967 | 34178026 | 18534 | UBAP1                    | 0.394711  | -0.19351 | -0.300198 | -0.123525 | -0.309849 |
| A_14_P114097 | 9 | 34247917 | 34247975 | 31169 | C9orf48                  | 0.306905  | -0.07417 | 0.039787  | 0.621816  | -0.076651 |
| A_14_P104789 | 9 | 34300936 | 34300995 | 27246 | KIF24                    | -6.72E-04 | -0.41329 | -0.03348  | -0.166138 | -0.151306 |
| A_14_P117683 | 9 | 34326250 | 34326303 | 28904 | NUDT2                    | 0.236063  | -0.052   | 0.075089  | -0.19192  | -0.354925 |
| A_14_P136312 | 9 | 34371776 | 34371835 | 18956 | C9orf24                  | 0.008258  | -0.16829 | -0.163932 | -0.022044 | -0.408169 |
| A_14_P102888 | 9 | 34388235 | 34388294 | 29180 | C9orf25                  | -0.071137 | -0.23526 | 0.026904  | -0.327557 | -0.318243 |
| A_14_P132242 | 9 | 34462039 | 34462098 | 32440 | DNAI1                    | 0.095943  | -0.62517 | -0.184587 | -0.257856 | -0.442656 |
| A_14_P117242 | 9 | 34510945 | 34510996 | 27001 | THC2146982               | -0.085688 | -0.39113 | -0.231334 | -0.217087 | -0.388803 |
| A_14_P107103 | 9 | 34578605 | 34578663 | 2415  | CNTFR                    | 0.626748  | 0.190371 | 0.407655  | 0.094846  | -0.331782 |
| A_14_P107615 | 9 | 34600488 | 34600545 | 28830 | chr9:034600488-034600545 | 0.507087  | 0.189805 | 0.219901  | 0.466607  | 0.217792  |
| A_14_P119846 | 9 | 34604028 | 34604074 | 1279  | DCTN3                    | 0.453383  | -0.23495 | -0.011482 | -0.063632 | -0.171023 |
| A_14_P103245 | 9 | 34608506 | 34608565 | 39908 | DCTN3                    | 0.357482  | 0.120128 | 0.397413  | 0.389238  | -0.076429 |
| A_14_P107916 | 9 | 34626747 | 34626806 | 22875 | OPRS1                    | 0.072721  | -0.52324 | -0.275523 | 0.60707   | -0.605241 |
| A_14_P100216 | 9 | 34638095 | 34638150 | 30140 | GALT                     | 0.750208  | 0.070485 | 0.205347  | 0.185019  | -0.012665 |
| A_14_P131240 | 9 | 34651841 | 34651899 | 2713  | IL11RA                   | -0.097607 | -0.2062  | 0.079657  | -0.315154 | -0.030782 |
| A_14_P132346 | 9 | 34651900 | 34651957 | 29035 | CCL27                    | 0.02268   | -0.88787 | -0.410581 | -0.651893 | -0.734062 |
| A_14_P112609 | 9 | 34654682 | 34654738 | 3637  | CCL27                    | 0.369595  | -0.37325 | -0.017687 | -0.387651 | -0.236943 |
| A_14_P129790 | 9 | 34680988 | 34681036 | 601   | CCL19                    | 0.153532  | -0.59691 | -0.158676 | -0.121458 | -0.190776 |
| A_14_P112392 | 9 | 34856614 | 34856673 | 23095 | chr9:034856614-034856673 | -0.636072 | -0.71814 | -0.541331 | -0.831641 | -0.474281 |
| A_14_P122431 | 9 | 34980765 | 34980815 | 15415 | DNAJB5                   | 0.061117  | -0.40556 | 0.012166  | -0.082556 | -0.158161 |
| A_14_P124958 | 9 | 34986075 | 34986134 | 680   | DNAJB5                   | -0.52438  | -1.29041 | -1.074702 | -0.900388 | -1.134492 |
| A_14_P124926 | 9 | 35049634 | 35049690 | 27009 | VCP                      | -0.403195 | -1.43459 | -0.763996 | -0.768318 | -0.741136 |
| A_14_P103760 | 9 | 35057909 | 35057967 | 6894  | VCP                      | 0.174796  | -0.34323 | 0.259517  | 0.118624  | -0.00406  |
| A_14_P127907 | 9 | 35063835 | 35063894 | 22798 | FANCG                    | 0.00863   | -0.5857  | -0.357786 | -0.249614 | -0.490074 |
| A_14_P108514 | 9 | 35066524 | 35066568 | 9958  | FANCG                    | 0.103031  | -0.80142 | -0.272602 | -0.203167 | -0.501794 |
| A_14_P120187 | 9 | 35068864 | 35068919 | 18008 | FANCG                    | 0.089587  | -0.73316 | 0.045152  | -0.020976 | -0.133443 |
| A_14_P123344 | 9 | 35080704 | 35080763 | 30042 | PIGO                     | 0.07574   | -0.92531 | -0.160909 | -0.140209 | -0.287277 |
| A_14_P124126 | 9 | 35091632 | 35091689 | 20322 | STOML2                   | -0.037205 | -0.90819 | 0.040275  | -0.077715 | -0.151656 |
| A_14_P102628 | 9 | 35097349 | 35097397 | 39368 | KIAA1539                 | 0.235307  | -0.69834 | 0.030316  | -0.131522 | -0.350677 |
| A_14_P122160 | 9 | 35100120 | 35100174 | 1425  | KIAA1539                 | 0.335394  | -0.32337 | 0.546033  | 0.165293  | 0.214261  |
| A_14_P100981 | 9 | 35105705 | 35105749 | 36923 | KIAA1539                 | -0.011362 | -0.35076 | -0.132259 | -0.263461 | -0.394752 |
| A_14_P110697 | 9 | 35186492 | 35186551 | 17025 | UNC13B                   | -0.180418 | -0.22701 | 0.151844  | -0.160532 | -0.126135 |
| A_14_P138480 | 9 | 35233265 | 35233324 | 5540  | UNC13B                   | -0.141204 | -0.52014 | -0.481864 | -0.478231 | -0.523293 |
| A_14_P135219 | 9 | 35303877 | 35303933 | 33947 | UNC13B                   | -0.41731  | -0.36807 | -0.122562 | -0.359524 | 0.20573   |
| A_14_P133367 | 9 | 35352007 | 35352066 | 38671 | UNC13B                   | -0.276304 | -0.2439  | -0.329889 | -0.275867 | -0.106933 |
| A_14_P123722 | 9 | 35394384 | 35394443 | 4842  | UNC13B                   | -0.481994 | -0.52684 | -0.389667 | -0.52361  | -0.491558 |
| A_14_P107058 | 9 | 35532843 | 35532902 | 5580  | RUSC2                    | -1.162804 | -0.80991 | -0.542459 | -0.659273 | -0.674067 |
| A_14_P128330 | 9 | 35598815 | 35598866 | 10047 | TESK1                    | -0.666665 | -0.46003 | 0.019753  | -0.077588 | -0.333928 |
| A_14_P116075 | 9 | 35602878 | 35602935 | 7051  | CD72                     | -0.568019 | -0.31496 | 1.324054  | -0.262706 | -0.397671 |
| A_14_P132313 | 9 | 35648056 | 35648115 | 17801 | chr9:035648056-035648115 | 0.033749  | 0.240067 | 0.369232  | 0.146065  | 0.095561  |
| A_14_P121234 | 9 | 35649099 | 35649150 | 23932 | C9orf100                 | -1.000998 | -0.04378 | 0.529981  | -0.318191 | -0.138888 |
| A_14_P119129 | 9 | 35654853 | 35654900 | 38469 | C9orf100                 | -0.055756 | -0.22467 | 0.428868  | 0.288874  | -0.012627 |
| A_14_P121177 | 9 | 35664281 | 35664329 | 397   | CA9                      | -1.119065 | -0.81381 | -0.250721 | -0.119337 | -0.609346 |
| A_14_P138050 | 9 | 35667180 | 35667239 | 18240 | CA9                      | -0.642137 | -0.32245 | 0.147768  | 0.090304  | -0.229929 |
| A_14_P138856 | 9 | 35668536 | 35668595 | 21573 | CA9                      | -0.422241 | -0.00782 | 0.445599  | 0.418159  | -0.090095 |
| A_14_P107838 | 9 | 35673662 | 35673721 | 764   | TPM2                     | -0.553652 | -0.21334 | 0.502398  | 0.323651  | -0.002602 |
| A_14_P120241 | 9 | 35698126 | 35698185 | 6363  | TLN1                     | -0.329637 | -0.29443 | 0.244007  | 0.138326  | 0.029051  |
| A_14_P121653 | 9 | 35722931 | 35722978 | 34668 | CREB3                    | -0.696304 | -0.49192 | 0.061098  | -0.201414 | -0.392774 |
| A_14_P135440 | 9 | 35723127 | 35723173 | 31645 | CREB3                    | -0.568528 | -0.56533 | 0.112943  | -0.200259 | -0.343242 |
| A_14_P121067 | 9 | 35727452 | 35727502 | 33045 | GBA2                     | -0.677692 | -0.6067  | 0.054048  | -0.218427 | -0.491192 |
| A_14_P118026 | 9 | 35728745 | 35728791 | 25857 | GBA2                     | -0.631747 | -0.64479 | -0.238199 | -0.351579 | -0.578587 |
| A_14_P132355 | 9 | 35746179 | 35746238 | 9015  | KIAA0258                 | -1.094422 | -0.59793 | -0.176142 | -0.458703 | -0.51531  |
| A_14_P129551 | 9 | 35798809 | 35798862 | 38101 | NPR2                     | -0.931423 | -0.72527 | -0.105751 | -0.144184 | -0.660985 |
| A_14_P104409 | 9 | 35802929 | 35802988 | 35621 | chr9:035802929-035802988 | -0.943359 | -0.47736 | 0.125811  | -0.104896 | -0.493479 |
| A_14_P108539 | 9 | 35819796 | 35819840 | 3379  | C9orf127                 | -0.137016 | -0.35257 | 1.964897  | -0.003548 | -1.990746 |
| A_14_P115158 | 9 | 35832125 | 35832184 | 16490 | C9orf127                 | -0.842672 | -0.54956 | -0.192008 | -0.245349 | -0.312452 |
| A_14_P133985 | 9 | 35946958 | 35947017 | 29829 | chr9:035946958-035947017 | -0.902599 | -0.51955 | -0.078742 | -0.422507 | -0.306743 |
| A_14_P112860 | 9 | 36042266 | 36042325 | 5148  | RECK                     | -0.863939 | -0.70775 | -0.299322 | -0.654788 | -0.365445 |
| A_14_P131230 | 9 | 36090483 | 36090542 | 33527 | RECK                     | -1.011807 | -0.35454 | -0.043837 | -0.386948 | 0.240484  |
| A_14_P130375 | 9 | 36153040 | 36153099 | 1194  | C9orf19                  | -0.407368 | -0.20271 | 0.048589  | 0.061182  | -0.533859 |
| A_14_P103078 | 9 | 36161237 | 36161296 | 19849 | CCIN                     | -0.613634 | -0.24078 | 0.124385  | 0.301014  | -0.016897 |
| A_14_P114080 | 9 | 36182065 | 36182124 | 30701 | CLTA                     | -0.656156 | -0.47529 | -0.022625 | -0.148346 | -0.337511 |
| A_14_P137115 | 9 | 36207256 | 36207315 | 38266 | GNE                      | -1.043526 | -0.64022 | 0.062034  | -0.303603 | -0.004079 |
| A_14_P133280 | 9 | 36353448 | 36353507 | 30360 | RNF38                    | 0.267234  | -2.11282 | -2.476257 | 0.847771  | -0.664607 |
| A_14_P109345 | 9 | 36390093 | 36390152 | 23287 | RNF38                    | -1.791359 | -0.9251  | -0.656517 | -0.645447 | -0.61795  |

|              |   |          |          |       |                          |           |          |           |           |           |
|--------------|---|----------|----------|-------|--------------------------|-----------|----------|-----------|-----------|-----------|
| A_14_P109893 | 9 | 36409434 | 36409493 | 27523 | chr9:036409434-036409493 | -0.585924 | -0.46535 | -0.383492 | -0.288143 | -0.367641 |
| A_14_P121712 | 9 | 36579598 | 36579656 | 19520 | MELK                     | -1.319689 | -0.70375 | -0.205263 | -0.229465 | -0.150649 |
| A_14_P139424 | 9 | 36620266 | 36620325 | 22854 | MELK                     | -1.020292 | -0.36072 | -0.131541 | -0.367982 | -0.013438 |
| A_14_P129125 | 9 | 36647230 | 36647289 | 7437  | MELK                     | -1.168392 | -0.58492 | -0.415887 | -0.698724 | -0.263186 |
| A_14_P122061 | 9 | 36659337 | 36659396 | 42388 | MELK                     | -1.247056 | -0.27264 | -0.258674 | -0.378761 | 0.065613  |
| A_14_P120896 | 9 | 36739801 | 36739860 | 13092 | chr9:036739801-036739860 | -0.85282  | -0.03284 | -0.647972 | -0.152222 | -0.40254  |
| A_14_P114256 | 9 | 36829459 | 36829511 | 19955 | PAX5                     | -0.151349 | -0.25263 | 0.157476  | -0.06433  | 0.237443  |
| A_14_P103517 | 9 | 36883592 | 36883651 | 29361 | PAX5                     | -0.724971 | -0.0894  | 0.063211  | 0.103743  | 0.379541  |
| A_14_P116847 | 9 | 36930263 | 36930322 | 6098  | PAX5                     | -0.904616 | -0.62269 | -0.226252 | -0.168177 | -0.346664 |
| A_14_P111937 | 9 | 36982705 | 36982764 | 15005 | PAX5                     | -0.576625 | -0.12592 | 0.053034  | -0.212223 | 0.299339  |
| A_14_P122903 | 9 | 37024017 | 37024074 | 27506 | PAX5                     | -1.034977 | -0.45815 | -0.229442 | -0.397878 | -0.250481 |
| A_14_P119036 | 9 | 37119266 | 37119325 | 37219 | ZCCHC7                   | -1.500462 | -1.10428 | -0.485299 | -0.588113 | -0.552382 |
| A_14_P104590 | 9 | 37146161 | 37146220 | 19473 | ZCCHC7                   | -1.225804 | -0.98276 | -0.524201 | -0.998213 | -0.503627 |
| A_14_P103909 | 9 | 37176788 | 37176847 | 31009 | ZCCHC7                   | -0.783364 | -0.53777 | -0.878374 | -0.387418 | -0.580087 |
| A_14_P124730 | 9 | 37236517 | 37236576 | 18277 | ZCCHC7                   | -1.626227 | -0.78357 | -0.702717 | -0.564948 | -0.419617 |
| A_14_P120276 | 9 | 37317772 | 37317830 | 16664 | ZCCHC7                   | -0.67681  | -0.67965 | -0.616171 | -0.509292 | -0.119725 |
| A_14_P126471 | 9 | 37347838 | 37347897 | 14201 | ZCCHC7                   | -0.653171 | -0.33738 | -0.464639 | -0.131357 | 0.217181  |
| A_14_P139958 | 9 | 37413984 | 37414041 | 6596  | GRHPR                    | -0.626091 | -0.30359 | -0.103525 | 0.078191  | 0.129845  |
| A_14_P123966 | 9 | 37420750 | 37420802 | 11635 | GRHPR                    | -0.352929 | 0.151713 | -0.100914 | 0.137635  | 0.562536  |
| A_14_P111385 | 9 | 37450967 | 37451026 | 22275 | ZBTB5                    | -1.198626 | -0.63232 | -0.129684 | -0.289636 | -0.102751 |
| A_14_P128488 | 9 | 37479286 | 37479345 | 25970 | PAF53                    | -1.185104 | -0.35894 | -0.33203  | -0.335467 | 0.101664  |
| A_14_P136992 | 9 | 37491694 | 37491753 | 15505 | PAF53                    | -0.785885 | -0.46065 | 0.011594  | 0.056499  | -0.315375 |
| A_14_P126555 | 9 | 37650527 | 37650586 | 17800 | FRMPD1                   | -0.994178 | -0.80799 | -0.369261 | -0.462833 | -0.401998 |
| A_14_P109933 | 9 | 37701328 | 37701386 | 23633 | FRMPD1                   | -1.45067  | -0.81439 | -0.395601 | -0.439327 | -0.268317 |
| A_14_P134578 | 9 | 37750851 | 37750910 | 11499 | RG9MTD3                  | -1.309696 | -0.60206 | 0.155138  | -0.487057 | -0.211183 |
| A_14_P137395 | 9 | 37757134 | 37757193 | 1954  | RG9MTD3                  | -1.171137 | -0.66404 | -0.058118 | -0.401533 | -0.368918 |
| A_14_P132980 | 9 | 37768581 | 37768640 | 23265 | RG9MTD3                  | -0.8491   | -0.25652 | 0.357503  | -0.141024 | -0.079308 |
| A_14_P123135 | 9 | 37771956 | 37772013 | 35712 | EXOSC3                   | -0.41937  | -0.82618 | -0.148217 | -0.116216 | -0.530158 |
| A_14_P105464 | 9 | 37847269 | 37847328 | 8007  | WDR32                    | -1.066916 | -0.91216 | -0.648659 | -0.729516 | -0.524796 |
| A_14_P101687 | 9 | 37883635 | 37883694 | 20380 | MCART1                   | -1.397225 | -1.18708 | -0.599216 | -0.676856 | -0.227236 |
| A_14_P103259 | 9 | 37911524 | 37911583 | 13380 | SHB                      | -0.408558 | -0.14037 | 0.020527  | 0.224446  | 0.442819  |
| A_14_P139815 | 9 | 37988780 | 37988839 | 24314 | SHB                      | -0.419609 | 0.430445 | 0.469984  | 0.22622   | 0.588404  |
| A_14_P132368 | 9 | 38040719 | 38040778 | 24659 | SHB                      | -0.563261 | -0.32135 | -0.121998 | -0.048217 | 0.118354  |
| A_14_P102076 | 9 | 38343993 | 38344052 | 25838 | chr9:038343993-038344052 | -0.738926 | -0.14585 | -0.159247 | -0.053977 | 0.780598  |
| A_14_P134247 | 9 | 38388612 | 38388671 | 38560 | chr9:038388612-038388671 | -0.650432 | -0.11325 | -0.147056 | 0.157891  | 0.750093  |
| A_14_P117703 | 9 | 38526827 | 38526886 | 19491 | chr9:038526827-038526886 | -1.792146 | -1.32892 | -0.932253 | -1.202012 | -0.207817 |
| A_14_P125308 | 9 | 38612201 | 38612248 | 27637 | C9orf122                 | 0.036897  | -0.24279 | 1.377149  | 0.049823  | -0.8073   |
| A_14_P125020 | 9 | 38653212 | 38653271 | 8716  | chr9:038653212-038653271 | -0.495922 | -0.67516 | -0.163017 | 0.190468  | 0.150269  |
| A_14_P108800 | 9 | 38758232 | 38758291 | 20963 | chr9:038758232-038758291 | -1.473163 | -0.74886 | -0.509728 | -0.878558 | 0.158629  |
| A_14_P107100 | 9 | 39130222 | 39130281 | 10537 | CNTNAP3                  | -0.258296 | -1.06561 | -0.84359  | -0.974129 | -0.480644 |
| A_14_P128926 | 9 | 39146895 | 39146954 | 33893 | CNTNAP3                  | -0.721116 | -0.99231 | -0.721222 | -0.718115 | -0.197211 |
| A_14_P127987 | 9 | 40238048 | 40238102 | 43340 | CNTNAP3                  | 0.022471  | -0.29781 | -0.1742   | -0.208093 | 0.456546  |
| A_14_P139744 | 9 | 40955632 | 40955673 | 19231 | CNTNAP3                  | -0.690485 | -1.51324 | -1.040579 | -1.52978  | -0.810979 |
| A_14_P125736 | 9 | 42531158 | 42531099 | 30720 | chr9:042531158-042531099 | -0.399461 | -1.1217  | -0.359293 | -0.635342 | -0.576788 |
